# Supplementary material for: From byproducts to NLO-active dyes: catalyst-free transfer hydrogenation in the modular synthesis of merocyanines
Source: Royal Society of Chemistry journal article supplement (doi:10.1039/d4nj00820k), 2024-01-01
Supplement: d4nj00820k1.pdf [file d4nj00820k1.pdf]

## Supporting Information for

### From byproducts to NLO-active dyes: catalyst-free transfer hydrogenation in the modular synthesis of merocyanines

*Jie Zou,<sup>†a,b,c</sup> Yi Pan,<sup>†b</sup> Di Zhang,<sup>a,b,c</sup> Jie Zhang,<sup>a,b</sup> Weilong Chen,<sup>a,b,c</sup> Hongyan Sun,<sup>a,b</sup>  
Kai-Chung Lau,<sup>b\*</sup> and Jingdong Luo<sup>a,b,c\*</sup>*

<sup>a</sup> Shenzhen Research Institute, City University of Hong Kong, Shenzhen 518057, China

<sup>b</sup> Department of Chemistry, City University of Hong Kong, Kowloon, Hong Kong SAR, China

<sup>c</sup> Hong Kong Institute for Clean Energy, City University of Hong Kong, Kowloon, Hong Kong SAR, China

<sup>†</sup> These authors contributed equally.

\*corresponding authors: kaichung@cityu.edu.hk, jingdluo@cityu.edu.hk.

### Table of Content

|                                       |     |
|---------------------------------------|-----|
| <b>1. Computational Details</b> ..... | 2   |
| <b>2. Synthetic Schemes</b> .....     | 6   |
| <b>3. Experimental Section</b> .....  | 10  |
| <b>4. Spectra</b> .....               | 28  |
| <b>5. X-ray crystallography</b> ..... | 109 |
| <b>6. References</b> .....            | 113 |

## 1. Computational Details

The preliminary calculations (Table S1) were done at the B3LYP-D3(BJ)/def2-TZVP//B3LYP-D3(BJ)/def2-SVP level of theory with the Gibbs free energy corrections taken at the B3LYP-D3(BJ)/def2-SVP level.<sup>1-4</sup> The solvent effect of acetic anhydride ( $\epsilon = 21.0$ ) was taken account by the Polarizable Continuum Model (PCM).<sup>5, 6</sup>

The complete reaction mechanisms and potential energy surfaces (Figure 4, and Figure S1 to S3) were calculated at the B3LYP-D3(BJ)/ma-TZVP level in PCM (acetic anhydride,  $\epsilon = 21.0$ ).<sup>7</sup> The nature of all stationary points (minima and transition state structures) was confirmed by vibrational frequencies calculations. All calculations were performed using Gaussian 16 quantum chemistry software package.<sup>8</sup>

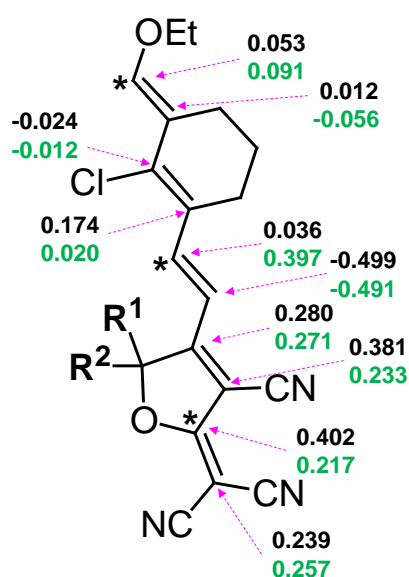

**Figure S1.** The atomic charges of carbon centers along the polymethine chain of **TCF-A2** ( $R^1$ ,  $R^2$  = methyl, in black) and **TCF-A6** ( $R^1$ ,  $R^2$  = 4-fluorophenyl, in green) at the B3LYP-D3(BJ)/ma-TZVP level of theory.

**Table S1.** The activation energy ( $\Delta G_{298}^\ddagger$ , kcal/mol) of the first TS in the initial step of hydride transfer (HT) and nucleophilic addition (NA) pathways, obtained at the B3LYP-D3(BJ)/def2-TZVP//B3LYP-D3(BJ)/def2-SVP level of theory (Gibbs free energy corrections at the B3LYP-D3(BJ)/def2-SVP level, **R** is -CH<sub>3</sub>) and at the B3LYP-D3(BJ)/ma-TZVP level (for both geometrical optimizations and energy corrections). The dielectric constant of 21.0 is used for the solvent of acetic anhydride.

|                                                                               |                                                     |                                                   |                  |
|-------------------------------------------------------------------------------|-----------------------------------------------------|---------------------------------------------------|------------------|
| <b>(i) HT pathway</b>                                                         |                                                     |                                                   |                  |
| $\Delta G_{298}^\ddagger$ at<br>B3LYP-D3(BJ)/def2-TZVP//B3LYP-D3(BJ)/def2-SVP | <b>26.5</b>                                         | <b>26.3</b>                                       | <b>36.5</b>      |
| $\Delta G_{298}^\ddagger$ at<br>B3LYP-D3(BJ)/ma-TZVP                          | <b>27.0</b><br>(detailed<br>pathway in<br>Figure 4) | <b>25.5</b><br>(detailed pathway<br>in Figure S3) | ---              |
| <b>(ii) NA pathway</b>                                                        |                                                     |                                                   |                  |
| $\Delta G_{298}^\ddagger$ at<br>B3LYP-D3(BJ)/def2-TZVP//B3LYP-D3(BJ)/def2-SVP | <b>37.0</b>                                         | <b>not found</b>                                  | <b>not found</b> |

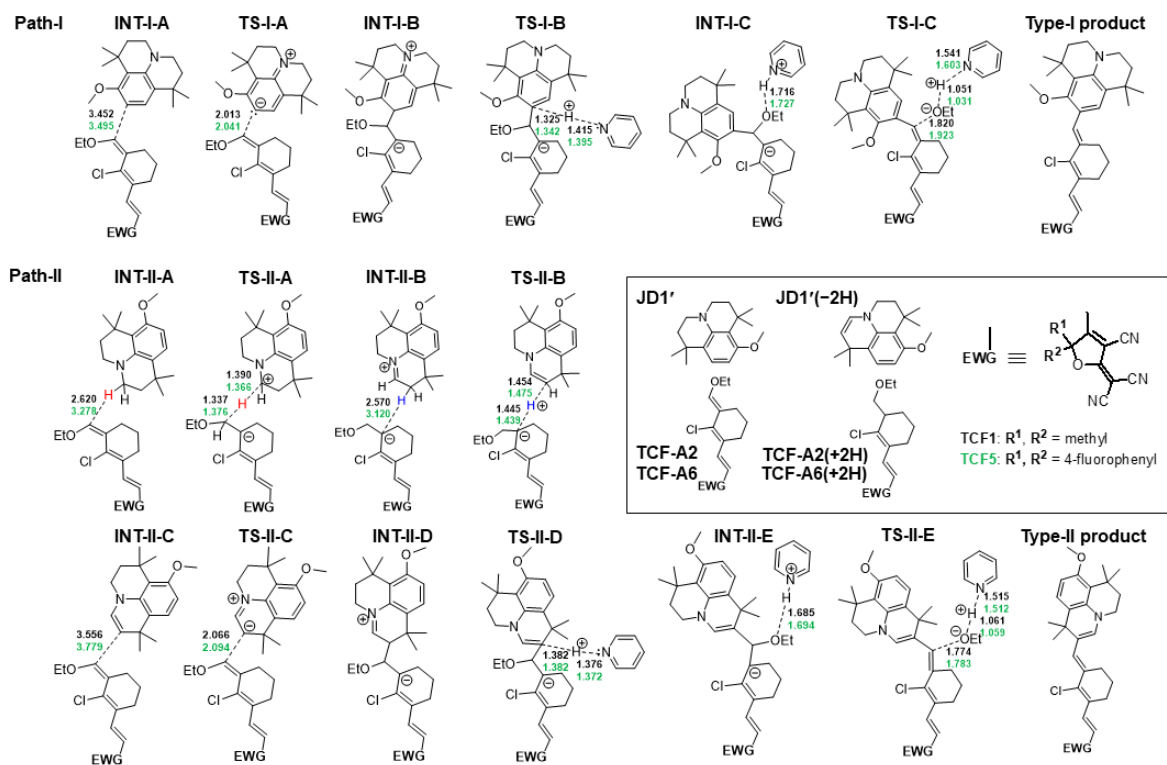

**Figure S2.** Structures of intermediates (**INTs**) and transition states (**TSs**) for the reactions between 8-methoxyjulolidine (**JD1'**) and two hemicyanine adducts bearing the electron-withdrawing group (EWG) of TCF, namely **TCF-A2** (**TCF1**-based) and **TCF-A6** (**TCF5**-based), by following the **Path I** or **Path II** to form new push-pull chromophores at the B3LYP-D3(BJ)/ma-TZVP level. Bond lengths are in angstrom ( $\text{\AA}$ ), black color for **TCF1**-based and green color for **TCF5**-based.

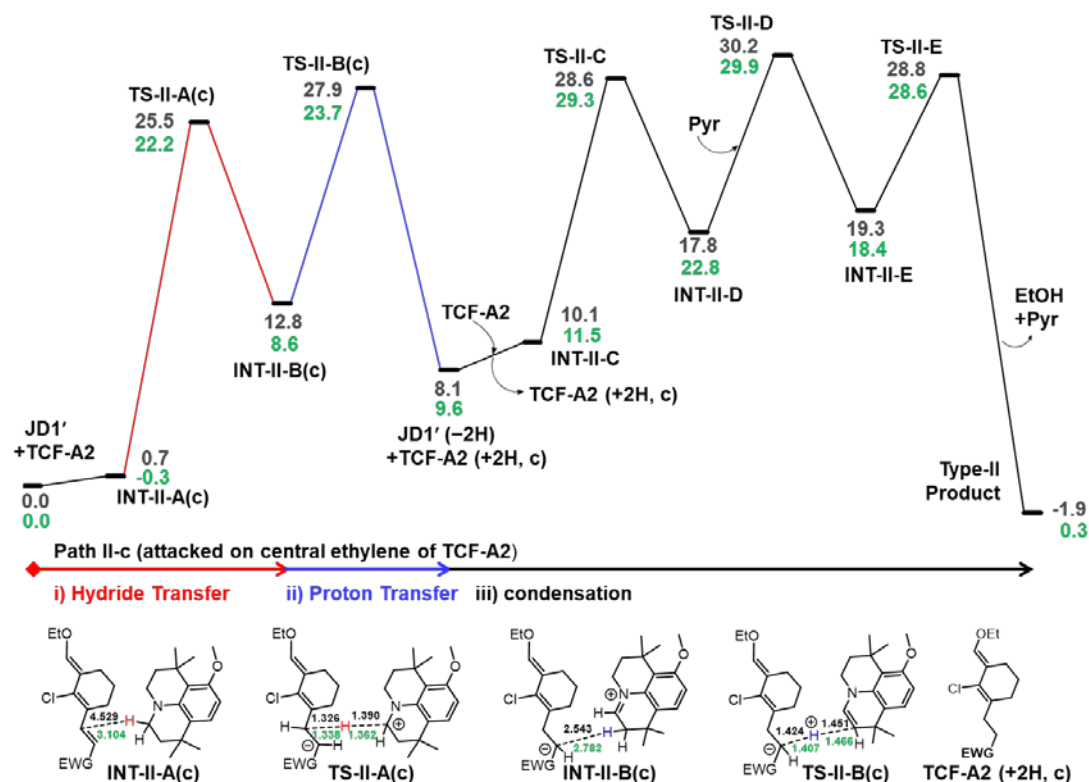

**Figure S3.** PES and structures of the reactions between 8-methoxyjulolidine (**JD1'**) and  $\pi$ -conjugated TCF acceptor **TCF-A2** (**TCF1**-based) and **TCF-A6** (**TCF5**-based)) by following the **Path II-c** (attacked on central ethylene) to form new push-pull chromophores at the B3LYP-D3(BJ)/ma-TZVP level ( $\Delta G_{298}$ , kcal/mol). The dielectric constant of 21.0 is used for the solvent of acetic anhydride. The condensation pathway is same as that in Figure 4, except that the PES is elevated by 3.2 kcal/mol for **TCF-A2** and 4.1 kcal/mol for **TCF-A6**, respectively.

## 2. Synthetic Schemes

### 2.1 Synthesis of acceptors TCF1-TCF5

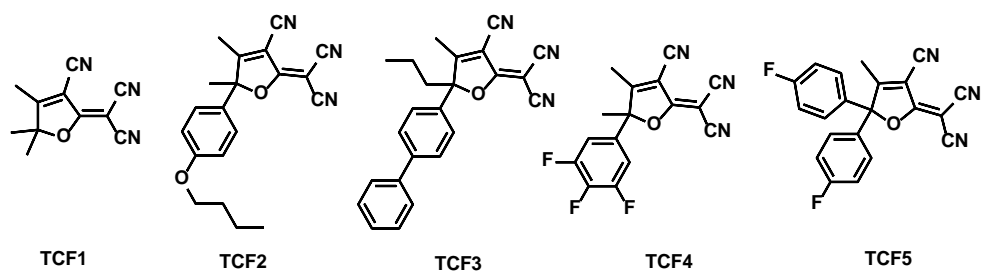

**Figure S4.** Molecular structures of TCF acceptors **TCF1-TCF5** in this study.

#### Scheme S1. Synthesis of the **TCF2** and **TCF3** acceptor.

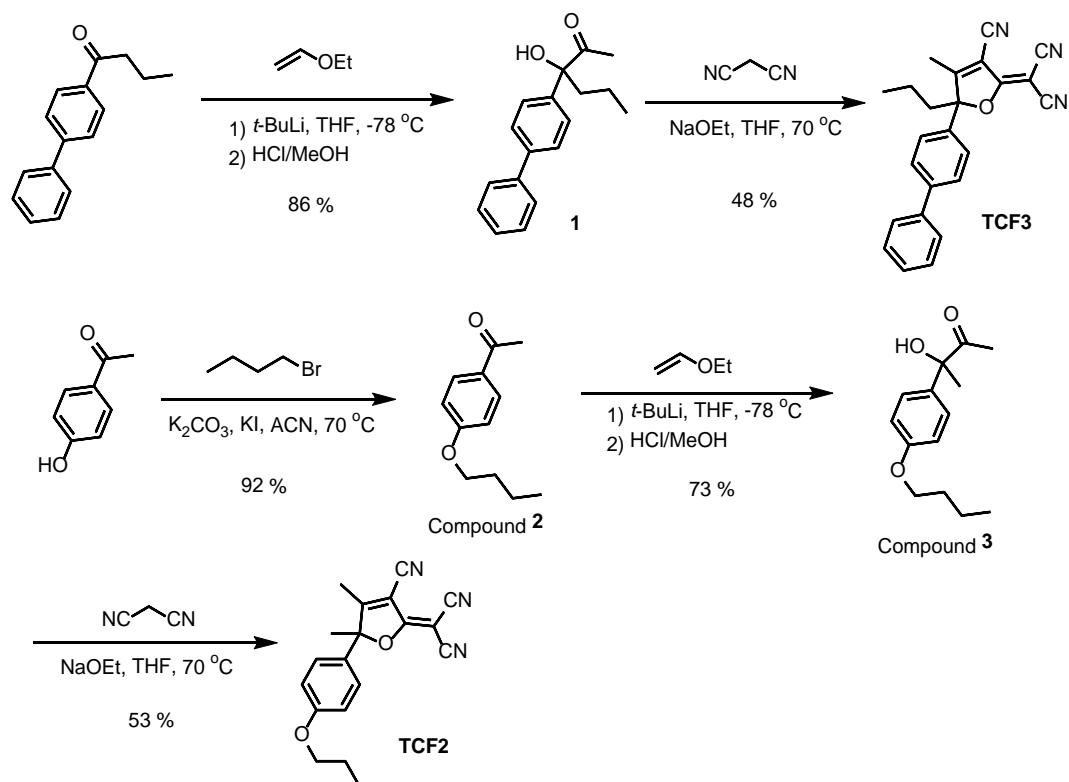

## 2.2 Synthesis of donor units JD1 and JD2

Scheme S2. Synthesis of the JD1 and JD2 donor.

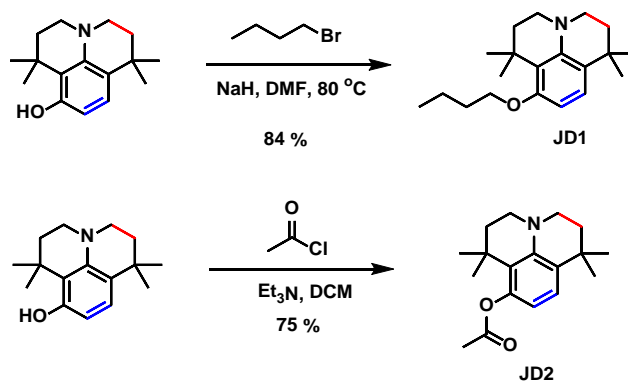

## 2.3 Synthesis of $\pi$ -conjugated trienyl precursor with terminal TCF acceptor units TCF-A1 to TCF-A7

Scheme S3. Synthesis of  $\pi$ -conjugated TCF acceptor precursors TCF-A1 to TCF-A7.

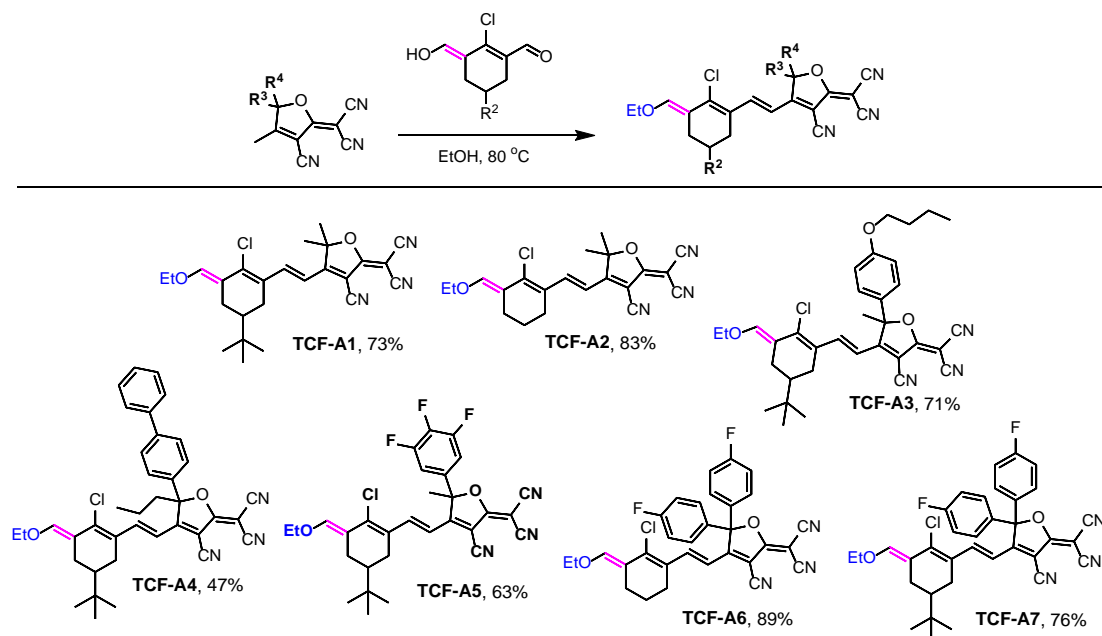

## 2.4 Optimization reactions of chromophores TE-I-1, TE-I-3 - TE-I-6, TE-II-1, and TE-II-3 - TE-II-6

**Table S2.** Evaluation of reaction time of TE-I-1 and TE-II-1.

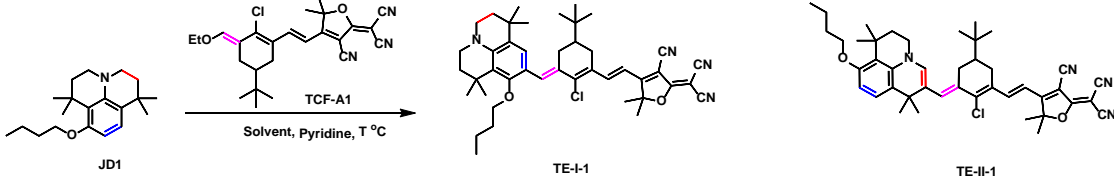

| Entry | Solvent           | Temperature | Time | TE-I-1 [%] | TE-II-1 [%] |
|-------|-------------------|-------------|------|------------|-------------|
| 1     | Ac <sub>2</sub> O | 80 °C       | 10 h | -          | 9           |
| 2     | Ac <sub>2</sub> O | 80 °C       | 14 h | 3          | 27          |
| 3     | Ac <sub>2</sub> O | 80 °C       | 18 h | 2          | 22          |

**Table S3.** Evaluation of reaction time of TE-I-3 and TE-II-3.

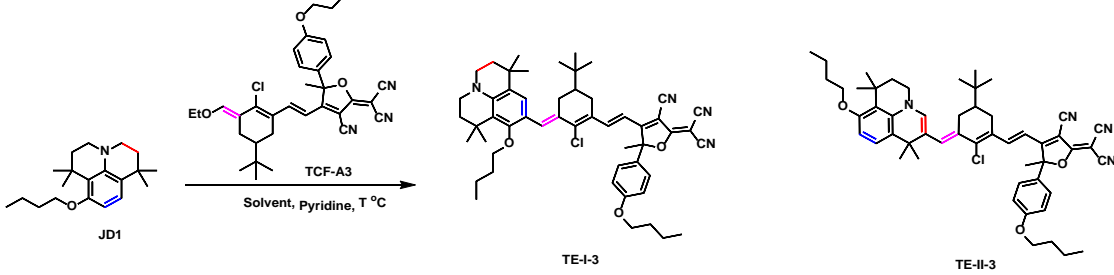

| Entry | Solvent           | Temperature | Time   | TE-I-3 [%] | TE-II-3 [%] |
|-------|-------------------|-------------|--------|------------|-------------|
| 1     | Ac <sub>2</sub> O | 80 °C       | 9.5 h  | 12         | 19          |
| 2     | Ac <sub>2</sub> O | 80 °C       | 13.5 h | 11         | 25          |
| 3     | Ac <sub>2</sub> O | 80 °C       | 16 h   | 6          | 19          |

**Table S4.** Evaluation of reaction time of TE-I-4 and TE-II-4.

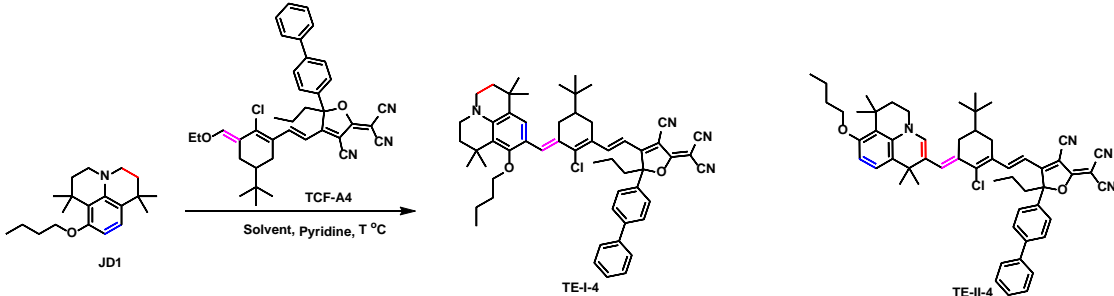

| Entry | Solvent           | Temperature | Time  | TE-I-4 [%] | TE-II-4 [%] |
|-------|-------------------|-------------|-------|------------|-------------|
| 1     | Ac <sub>2</sub> O | 80 °C       | 4 h   | 10         | 13          |
| 2     | Ac <sub>2</sub> O | 80 °C       | 6.5 h | 19         | 11          |
| 3     | Ac <sub>2</sub> O | 80 °C       | 15 h  | 3          | 4           |



**Table S5.** Evaluation of reaction time of **TE-I-5** and **TE-II-5**.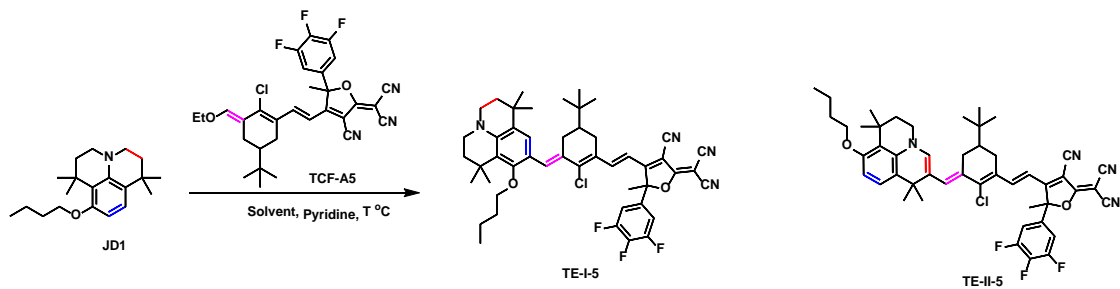

| Entry | Solvent           | Temperature | Time    | <b>TE-I-5</b> [%] | <b>TE-II-5</b> [%] |
|-------|-------------------|-------------|---------|-------------------|--------------------|
| 1     | Ac <sub>2</sub> O | 80 °C       | 1h40min | 25                | 4                  |
| 2     | Ac <sub>2</sub> O | 80 °C       | 2h      | 32                | 5                  |
| 3     | Ac <sub>2</sub> O | 80 °C       | 2h20min | 8                 | 9                  |

**Table S6.** Evaluation of reaction time of **TE-I-7** and **TE-II-7**.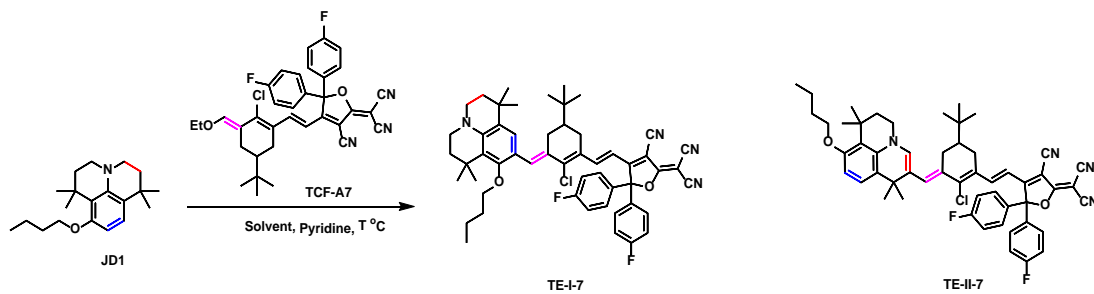

| Entry | Solvent           | Temperature | Time       | <b>TE-I-7</b> [%] | <b>TE-II-7</b> [%] |
|-------|-------------------|-------------|------------|-------------------|--------------------|
| 1     | Ac <sub>2</sub> O | 80 °C       | 1 h        | 26                | 2                  |
| 2     | Ac <sub>2</sub> O | 80 °C       | 1 h 40 min | 17                | 4                  |
| 3     | Ac <sub>2</sub> O | 80 °C       | 2 h        | 21                | 6                  |

### 3. Experimental Section

#### Materials and instruments

All chemicals were purchased from Energy Chemical or Dieckmann, and used as received unless otherwise mentioned. Acceptors **TCF1-TCF5** were synthesized by following the procedure previously reported.<sup>9-11</sup> Donors **JD1** was synthesized by following the procedure previously reported.<sup>12</sup> Hemicyanines **TCF-A1 - TCF-A7** were synthesized by following the procedure previously reported.<sup>10,13</sup>

The <sup>1</sup>H NMR and <sup>13</sup>C NMR spectra were recorded on Bruker 300MHz "AVANCE III HD" Nuclear Magnetic Resonance System (NMR-300), Bruker 400MHz "AVANCE III" Nuclear Magnetic Resonance System (NMR-400) and Bruker 600MHz "AVANCE III HD" Nuclear Magnetic Resonance System (NMR-600). High resolution mass spectrometry (HRMS) was taken at Thermo Scientific Q Exactive mass spectrometer and 4800 Plus MALDI TOF/TOF (SCIEX). For the formulation of EO polymers, the solvent dibromomethane (DBM) and 1,1,2-trichloroethane (TCE) were distilled prior to use. The cyclic voltammetric data were measured by Electrochemical Analyzer (CHI 750) using Ag/AgCl as the reference electrode, the platinum wire as working electrode, platinum gauze (5\*5\*0.3 mm) as counter electrode and 0.1 M tetrabutylammonium hexafluorophosphate (TBAPF) as the electrolyte in dichloromethane. Films used in absorption spectra and EO measurements were spin-coated on glass or ITO glass substrates with SPIN-PROCESS CONTROLLER. The UV-vis-NIR spectra of chromophores were recorded with Ultra-Violet Visible Scanning Spectrophotometer (Shimadzu 1700) and Ultra-Violet Visible Near Infra-red Spectrophotometer with Integrating Sphere (PE Lamda 750).

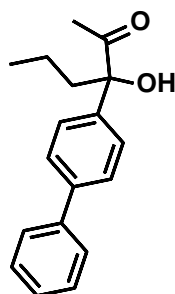

#### 3-([1,1'-biphenyl]-4-yl)-3-hydroxyhexan-2-one (1)

To a solution of ethyl vinyl ether (3.0 g, 41.7 mmol) in THF (15 mL) was added 20 mL of *t*-BuLi (1.3 M, 26 mmol) in pentane dropwise at -78 °C, under nitrogen for 2 h. The solution was warmed on an ice bath and stirred for 1 h. And then cooled to -78 °C. A solution of 4-phenylbutyrophenone (3.0 g, 13.4 mmol) in THF was added to the lithiated ether solution dropwise at -78 °C. The resulting mixture was stirred for 1 h at -78 °C, allowed to warm up to room temperature slowly for 2 h. The reaction was then quenched with 30 ml water, and the mixture was extracted with CH<sub>2</sub>Cl<sub>2</sub>. The combined organic layer was washed with water and dried over magnesium sulfate. After the solvent was evaporated, the residue was dissolved in 10 mL methanol and 10 mL HCl (aq) (1 M, 10 mmol) was added dropwise at room temperature. After stirring for 2 h, the resulting mixture was neutralized with NaHCO<sub>3</sub>, concentrated via rotary evaporation, and extracted with CH<sub>2</sub>Cl<sub>2</sub>. After the solvent was evaporated, the product was purified by chromatography (silica gel, ethyl acetate/hexane) to give a yellow oil (3.1 g, 86 %)

$^1\text{H}$  NMR ( $\text{CDCl}_3$ , 300MHz, ppm):  $\delta$  7.67-7.53 (m, 6H,  $\text{CH}_{\text{Ar}}$ ), 7.50-7.41 (m, 2H,  $\text{CH}_{\text{Ar}}$ ), 7.41-7.33 (m, 1H,  $\text{CH}_{\text{Ar}}$ ), 4.58 (bs, 1H, OH), 2.27-2.17 (m, 2H,  $\text{CH}_2$ ), 2.15 (s, 3H,  $\text{COCH}_3$ ), 1.66-1.48 (m, 1H,  $\text{CH}_2$ ), 1.32-1.16 (m, 1H,  $\text{CH}_2$ ), 1.03 (t,  $J = 7.3$  Hz, 3H,  $\text{CH}_3$ ).

$^{13}\text{C}\{^1\text{H}\}$  NMR ( $\text{CDCl}_3$ , 75MHz, ppm):  $\delta$  209.59, 140.75, 140.45, 140.03, 128.89, 127.56, 127.37, 127.13, 126.75, 82.64, 38.85, 23.75, 16.69, 14.51.

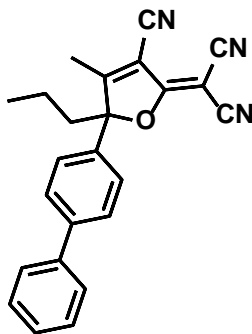

### 2-(5-([1,1'-biphenyl]-4-yl)-3-cyano-4-methyl-5-propylfuran-2(5H)-ylidene)malononitrile (**TCF3**)

To a solution of compound **1** (5.0 g, 18.7 mmol) and malonitrile (3.7 g, 56.1 mmol) in THF (20 mL) was added 2 mL of a freshly prepared solution of sodium ethoxide (1M, 2 mmol). The reaction mixture was stirred at 70 °C for 24 h, and then purified via flash chromatography on silica gel with a gradient eluent of  $\text{CH}_2\text{Cl}_2$  to afford a white solid (3.3 g, 48 %).

$^1\text{H}$  NMR ( $\text{CDCl}_3$ , 300MHz, ppm):  $\delta$  7.67 (d,  $J = 8.5$  Hz, 2H,  $\text{CH}_{\text{Ar}}$ ), 7.61-7.54 (m, 2H,  $\text{CH}_{\text{Ar}}$ ), 7.52-7.37 (m, 3H,  $\text{CH}_{\text{Ar}}$ ), 7.28 (d,  $J = 8.6$  Hz, 2H,  $\text{CH}_{\text{Ar}}$ ), 2.50 (ddd,  $J = 14.6, 11.7, 4.7$  Hz, 1H,  $\text{CH}_2$ ), 2.29 (s, 3H,  $\text{COCH}_3$ ), 2.27-2.11 (m, 1H,  $\text{CH}_2$ ), 1.41-1.19 (m, 2H,  $\text{CH}_2$ ), 1.04 (t,  $J = 7.3$  Hz, 3H,  $\text{CH}_3$ ).

$^{13}\text{C}\{^1\text{H}\}$  NMR ( $(\text{CD}_3)_2\text{CO}$ , 100MHz, ppm):  $\delta$  182.55, 177.13, 142.37, 139.58, 133.54, 129.02, 128.00, 127.74, 126.96, 126.21, 111.41, 110.85, 109.30, 105.10, 104.56, 57.48, 36.86, 16.40, 14.01, 13.19.

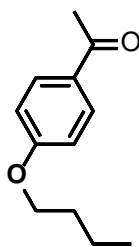

### 1-(4-butoxyphenyl)ethan-1-one (**2**)

A mixture of 1-bromobutane (4.5 g, 33.1 mmol), 4'-hydroxyacetophenone (3.0 g, 22.1 mmol), potassium carbonate (4.6 g, 33.1 mmol), and KI (0.4 g, 2.2 mmol) was dissolved in acetonitrile (20 mL). The reaction mixture was heated at 75 °C for 12 h. After cooling to room temperature, the reaction mixture was poured into water. The mixture was extracted with  $\text{CH}_2\text{Cl}_2$  and dried. After the removal of the solvents under reduced pressure, the residue was purified by column chromatography (silica gel, ethyl acetate/hexane) to give a colourless oil. (3.9 g, 92 %).

$^1\text{H}$  NMR ( $\text{CDCl}_3$ , 300MHz, ppm):  $\delta$  7.90-7.80 (m, 2H,  $\text{CH}_{\text{Ar}}$ ), 6.88-6.81 (m, 2H,  $\text{CH}_{\text{Ar}}$ ), 3.95 (t,  $J = 6.5$  Hz, 2H,  $\text{OCH}_2$ ), 2.48 (s, 3H,  $\text{COCH}_3$ ), 1.72 (tt,  $J = 12.8, 6.5$  Hz, 2H,  $\text{CH}_2$ ), 1.53-1.37 (m, 2H,  $\text{CH}_2$ ), 0.93 (t,  $J = 7.4$  Hz, 3H,  $\text{CH}_3$ ).

$^{13}\text{C}\{^1\text{H}\}$  NMR ( $\text{CDCl}_3$ , 100MHz, ppm):  $\delta$  196.61, 163.10, 130.52, 130.04, 114.08, 67.88, 31.11, 26.23, 19.16, 13.78.

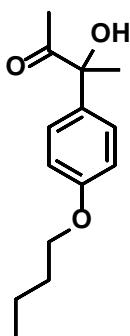

### 3-(4-butoxyphenyl)-3-hydroxybutan-2-one (**3**)

To a solution of ethyl vinyl ether (2.3 g, 31.2 mmol) in THF (10 mL) was added 16 mL of *t*-BuLi (1.3 M, 20.8 mmol) in pentane dropwise at  $-78\text{ }^{\circ}\text{C}$ , under nitrogen for 2 h. The solution was warmed on an ice bath and stirred for 1 h. And then cooled to  $-78\text{ }^{\circ}\text{C}$ . A solution of compound **2** (2.0 g, 10.4 mmol) in THF was added to the lithiated ether solution dropwise at  $-78\text{ }^{\circ}\text{C}$ . The resulting mixture was stirred for 1 h at  $-78\text{ }^{\circ}\text{C}$ , allowed to warm up to room temperature slowly for 2 h. The reaction was then quenched with 30 mL water, and the mixture was extracted with  $\text{CH}_2\text{Cl}_2$ . The combined organic layer was washed with water and dried over magnesium sulfate. After the solvent was evaporated, the residue was dissolved in 10 mL methanol and 10 mL HCl (aq) (1 M, 10 mmol) was added dropwise at room temperature. After stirring for 2 h, the resulting mixture was neutralized with  $\text{NaHCO}_3$ , concentrated via rotary evaporation, and extracted with  $\text{CH}_2\text{Cl}_2$ . After the solvent was evaporated, the product was purified by chromatography (silica gel, ethyl acetate/hexane) to give a yellow oil (1.8 g, 73 %).

$^1\text{H}$  NMR ( $\text{CDCl}_3$ , 300 MHz, ppm):  $\delta$  7.33-7.26 (m, 2H,  $\text{CH}_{\text{Ar}}$ ), 6.89-6.81 (m, 2H,  $\text{CH}_{\text{Ar}}$ ), 4.54 (s, 1H, OH), 3.92 (t,  $J = 6.5$  Hz, 2H,  $\text{OCH}_2$ ), 2.03 (s, 3H,  $\text{COCH}_3$ ), 1.79-1.63 (m, 5H,  $\text{CH}_2$ ,  $\text{CH}_3$ ), 1.46 (dq,  $J = 14.5$ , 7.3 Hz, 2H,  $\text{CH}_2$ ), 0.94 (t,  $J = 7.4$  Hz, 3H,  $\text{CH}_3$ ).

$^{13}\text{C}\{^1\text{H}\}$  NMR ( $\text{CDCl}_3$ , 75 MHz, ppm):  $\delta$  209.97, 158.91, 133.33, 127.16, 114.53, 79.52, 67.67, 31.28, 24.14, 23.40, 19.23, 13.85.

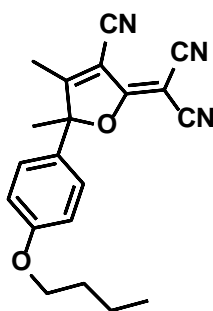

### 2-(5-(4-butoxyphenyl)-3-cyano-4,5-dimethylfuran-2(5H)-ylidene)malononitrile (**TCF2**)

To a solution of compound **3** (1.3 g, 5.5 mmol) and malonitrile (1.1 g, 16.5 mmol) in THF (5 mL) was added 0.5 mL of a freshly prepared solution of sodium ethoxide (1 M, 0.5 mmol). The reaction mixture was stirred at  $70\text{ }^{\circ}\text{C}$  for 24 h, and then purified via flash chromatography on silica gel with a gradient eluent of  $\text{CH}_2\text{Cl}_2$  to afford a white solid (1.0 g, 53 %).

$^1\text{H}$  NMR ( $(\text{CD}_3)_2\text{CO}$ , 300 MHz, ppm):  $\delta$  7.54-7.36 (m, 2H,  $\text{CH}_{\text{Ar}}$ ), 7.10-6.94 (m, 2H,  $\text{CH}_{\text{Ar}}$ ), 4.03 (t,  $J = 6.4$  Hz, 2H,  $\text{OCH}_2$ ), 2.30 (s, 3H,  $\text{CH}_3$ ), 2.13 (s, 3H,  $\text{CH}_3$ ), 1.82-1.68 (m, 2H,  $\text{CH}_2$ ), 1.56-1.41 (m, 2H,  $\text{CH}_2$ ), 0.96 (t,  $J = 7.4$  Hz, 3H,  $\text{CH}_3$ ).

$^{13}\text{C}\{^1\text{H}\}$  NMR ( $(\text{CD}_3)_2\text{CO}$ , 100MHz, ppm):  $\delta$  183.25, 176.92, 160.60, 127.60, 125.95, 115.00, 111.54, 110.97, 109.52, 104.96, 102.32, 67.61, 57.02, 31.05, 21.09, 18.96, 13.81, 13.20.

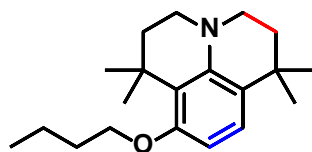

8-butoxy-1,1,7,7-tetramethyl-2,3,6,7-tetrahydro-1*H*,5*H*-pyrido[3,2,1-*ij*]quinoline (**JD1**)

To a solution of tetramethyljulolidine (3.0 g, 12.2 mmol) and NaH (60 %, dispersion in mineral oil) (0.7 g, 17.5 mmol) in DMF (20 mL) was added 1-bromobutane (2.0 g, 14.6 mmol). The reaction mixture was heated at 80 °C for 5 h. After cooling to room temperature, the reaction mixture was poured into water. The mixture was extracted with  $\text{CH}_2\text{Cl}_2$  and dried. After the removal of the solvents under reduced pressure, the residue was purified by column chromatography (silica gel, ethyl acetate/hexane) to give a yellow oil. (3.1 g, 84 %).

$^1\text{H}$  NMR ( $\text{CDCl}_3$ , 300MHz, ppm):  $\delta$  7.02 (d,  $J = 8.6$  Hz, 1H,  $\text{CH}_{\text{Ar}}$ ), 6.26 (d,  $J = 8.6$  Hz, 1H,  $\text{CH}_{\text{Ar}}$ ), 3.95 (t,  $J = 6.4$  Hz, 2H,  $\text{OCH}_2$ ), 3.15-2.98 (m, 4H,  $\text{NCH}_2$ ), 1.87-1.73 (m, 6H,  $\text{CH}_2$ ), 1.62-1.49 (m, 2H,  $\text{CH}_2$ ), 1.44 (s, 6H,  $\text{C}(\text{CH}_3)_2$ ), 1.29 (s, 6H,  $\text{C}(\text{CH}_3)_2$ ), 1.01 (t,  $J = 7.4$  Hz, 3H,  $\text{CH}_3$ ).

$^{13}\text{C}\{^1\text{H}\}$  NMR ( $\text{CDCl}_3$ , 75MHz, ppm):  $\delta$  156.86, 143.47, 124.74, 124.20, 117.93, 100.50, 67.20, 47.74, 47.30, 41.07, 37.59, 32.64, 32.30, 32.23, 31.77, 29.52, 19.77, 13.97.

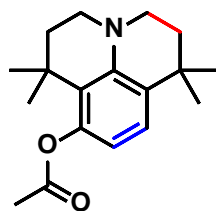

1,1,7,7-tetramethyl-2,3,6,7-tetrahydro-1*H*,5*H*-pyrido[3,2,1-*ij*]quinolin-8-yl acetate (**JD2**)

To a solution of tetramethyljulolidine (4.0 g, 16.3 mmol) and  $\text{Et}_3\text{N}$  (3.0 g, 29.4 mmol) in DCM (20 mL) was added acetyl chloride (1.9 g, 24.5 mmol) at 0 °C. The reaction mixture was warmed up to room temperature for 5 h. The reaction mixture was poured into water. The mixture was extracted with  $\text{CH}_2\text{Cl}_2$  and dried. After the removal of the solvents under reduced pressure, the residue was purified by column chromatography (silica gel, ethyl acetate/hexane) to give a yellow oil. (3.5 g, 75 %).

$^1\text{H}$  NMR ( $\text{CDCl}_3$ , 300MHz, ppm):  $\delta$  7.06 (d,  $J = 8.5$  Hz, 1H,  $\text{CH}_{\text{Ar}}$ ), 6.29 (d,  $J = 8.4$  Hz, 1H,  $\text{CH}_{\text{Ar}}$ ), 3.16-3.05 (m, 4H,  $\text{NCH}_2$ ), 2.34 (s, 3H,  $\text{COCH}_3$ ), 1.84-1.72 (m, 4H,  $\text{CH}_2$ ), 1.37 (s, 6H,  $\text{C}(\text{CH}_3)_2$ ), 1.30 (s, 6H,  $\text{C}(\text{CH}_3)_2$ ).

$^{13}\text{C}\{^1\text{H}\}$  NMR ( $\text{CDCl}_3$ , 75MHz, ppm):  $\delta$  169.93, 148.10, 143.26, 128.40, 124.86, 121.38, 111.21, 47.50, 46.96, 40.09, 37.05, 32.47, 32.20, 31.91, 29.83, 21.90.

**General Procedure for the synthesis of compounds TCF-A1 - TCF-A7**

Acceptor units **TCF1-TCF5** (2.5 mmol, 1.0 eq) and the bisaldehyde-like precursors (1.5 eq) were mixed in 10 mL EtOH. The reaction mixture was allowed to stir at 80 °C for 12 h and monitored by TLC. The dark red precipitate was collected via filtration.

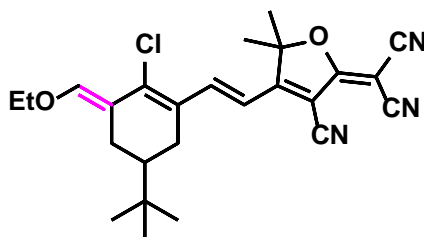

2-(4-((*E*)-2-((*E*)-5-(*tert*-butyl)-2-chloro-3-(ethoxymethylene)cyclohex-1-en-1-yl)vinyl)-3-cyano-5,5-dimethylfuran-2(*5H*)-ylidene)malononitrile (**TCF-A1**).

dark red solid (802 mg, 73 %).

$^1\text{H}$  NMR ( $\text{CDCl}_3$ , 400MHz, ppm):  $\delta$  8.05 (d,  $J = 15.9$  Hz, 1H, =CH), 7.20 (s, 1H, =CH), 6.46 (d,  $J = 15.9$  Hz, 1H, =CH), 4.13 (q,  $J = 7.1$  Hz, 2H,  $\text{OCH}_2$ ), 2.94 (d,  $J = 15.0$  Hz, 1H,  $\text{CH}_2$ ), 2.62 (d,  $J = 15.1$  Hz, 1H,  $\text{CH}_2$ ), 2.09 (dd,  $J = 15.7, 12.1$  Hz, 1H,  $\text{CH}_2$ ), 1.84 (t,  $J = 14.8$  Hz, 1H,  $\text{CH}_2$ ), 1.77 (s, 6H,  $\text{C}(\text{CH}_3)_2$ ), 1.49-1.40 (m, 1H, CH), 1.38 (t,  $J = 7.1$  Hz, 3H,  $\text{CH}_3$ ), 0.99 (s, 9H,  $\text{C}(\text{CH}_3)_3$ ).

$^{13}\text{C}\{^1\text{H}\}$  NMR ( $\text{CDCl}_3$ , 75MHz, ppm):  $\delta$  175.79, 174.52, 153.77, 144.57, 142.93, 128.15, 116.92, 112.91, 112.24, 111.47, 110.63, 97.57, 97.35, 70.62, 56.14, 42.07, 32.33, 27.48, 27.32, 26.95, 26.90, 24.94, 15.49.

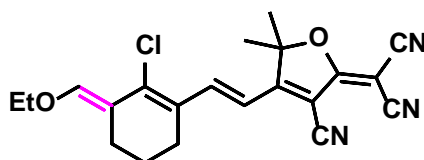

2-(4-((*E*)-2-((*E*)-2-chloro-3-(ethoxymethylene)cyclohex-1-en-1-yl)vinyl)-3-cyano-5,5-dimethylfuran-2(*5H*)-ylidene)malononitrile (**TCF-A2**).

dark red solid (795 mg, 83 %).

$^1\text{H}$  NMR ( $\text{CDCl}_3$ , 300MHz, ppm):  $\delta$  8.05 (d,  $J = 15.9$  Hz, 1H, =CH), 7.20 (s, 1H, =CH), 6.47 (d,  $J = 15.9$  Hz, 1H, =CH), 4.12 (q,  $J = 7.1$  Hz, 2H,  $\text{OCH}_2$ ), 2.50 (dt,  $J = 9.6, 4.9$  Hz, 4H,  $\text{CH}_2$ ), 1.84-1.74 (m, 8H,  $\text{CH}_2$ ,  $\text{C}(\text{CH}_3)_2$ ), 1.36 (t,  $J = 7.1$  Hz, 3H,  $\text{CH}_3$ ).

$^{13}\text{C}\{^1\text{H}\}$  NMR ( $\text{CDCl}_3$ , 150MHz, ppm):  $\delta$  175.78, 174.52, 153.86, 144.36, 142.96, 128.00, 116.22, 113.18, 112.22, 111.44, 110.66, 97.63, 97.37, 70.59, 56.16, 26.85, 26.32, 23.76, 20.45, 15.45.

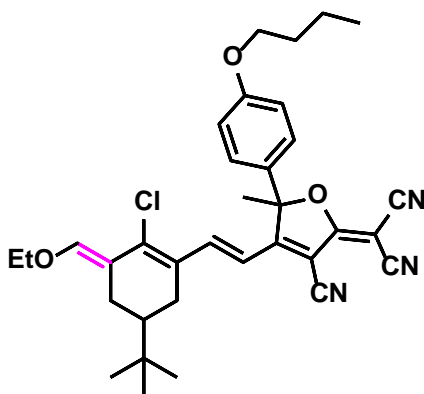

2-(5-(4-butoxyphenyl)-4-((*E*)-2-((*E*)-5-(*tert*-butyl)-2-chloro-3-(ethoxymethylene)cyclohex-1-en-1-yl)vinyl)-3-cyano-5-methylfuran-2(*5H*)-ylidene)malononitrile (**TCF-A3**).

dark red solid (610 mg, 71 %).

$^1\text{H}$  NMR ( $\text{CDCl}_3$ , 600MHz, ppm):  $\delta$  7.58 (dd,  $J = 21.3, 15.8$  Hz, 1H, =CH), 7.25-7.18 (m, 2H,  $\text{CH}_{\text{Ar}}$ ), 7.09 (s, 1H, =CH), 6.96-6.88 (m, 2H,  $\text{CH}_{\text{Ar}}$ ), 6.47 (dd,  $J = 15.7, 2.6$  Hz, 1H, =CH), 4.11-4.02 (m, 2H,  $\text{OCH}_2$ ),

4.02-3.91 (m, 2H, OCH<sub>2</sub>), 2.86 (d, *J* = 14.9 Hz, 1H, CH<sub>2</sub>), 2.52 (dd, *J* = 9.5, 6.4 Hz, 1H, CH<sub>2</sub>), 2.11 (d, *J* = 3.0 Hz, 3H, CH<sub>3</sub>), 2.02-1.94 (m, 1H, CH<sub>2</sub>), 1.82-1.71 (m, 3H, CH<sub>2</sub>), 1.52-1.43 (m, 2H, CH<sub>2</sub>), 1.38-1.29 (m, 4H, CH, CH<sub>3</sub>), 0.99-0.93 (m, 12H, CH<sub>3</sub>, C(CH<sub>3</sub>)<sub>3</sub>).

<sup>13</sup>C{<sup>1</sup>H} NMR (CDCl<sub>3</sub>, 150MHz, ppm): δ 175.90, 175.88, 174.32, 174.27, 160.61, 153.50, 153.47, 146.23, 146.13, 142.74, 128.29, 128.26, 127.48, 127.42, 127.36, 127.31, 116.96, 115.25, 115.23, 113.18, 113.13, 112.10, 111.55, 110.56, 98.94, 98.92, 98.18, 98.16, 70.51, 67.94, 56.46, 56.44, 42.07, 41.96, 32.28, 31.15, 27.39, 27.31, 27.28, 24.96, 24.91, 24.88, 19.20, 15.42, 13.83.

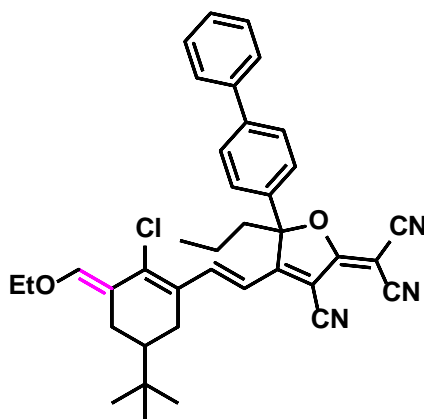

3-(5-([1,1'-biphenyl]-4-yl)-4-((*E*)-2-((*E*)-5-(*tert*-butyl)-2-chloro-3-(ethoxymethylene)cyclohex-1-en-1-yl)vinyl)-3-cyano-5-propylfuran-2(*5H*)-ylidene)malononitrile (**TCF-A4**).

dark red solid (389 mg, 47 %).

<sup>1</sup>H NMR (CDCl<sub>3</sub>, 400MHz, ppm): δ 7.73 (dd, *J* = 15.7, 4.8 Hz, 1H, =CH), 7.68-7.54 (m, 4H, CH<sub>Ar</sub>), 7.42 (dt, *J* = 17.1, 8.0 Hz, 5H, CH<sub>Ar</sub>), 7.11 (s, 1H, =CH), 6.50 (dd, *J* = 15.7, 7.0 Hz, 1H, =CH), 4.08 (q, *J* = 7.1 Hz, 2H, OCH<sub>2</sub>), 2.88 (d, *J* = 15.0 Hz, 1H, CH<sub>2</sub>), 2.77-2.65 (m, 1H, CH<sub>2</sub>), 2.58-2.39 (m, 2H, CH<sub>2</sub>), 2.02 (dd, *J* = 15.7, 12.1 Hz, 1H, CH<sub>2</sub>), 1.78 (t, *J* = 14.6 Hz, 1H, CH<sub>2</sub>), 1.39-1.21 (m, 6H, CH, CH<sub>2</sub>, CH<sub>3</sub>), 1.08-1.00 (m, 3H, CH<sub>3</sub>), 0.95 (s, 9H, C(CH<sub>3</sub>)<sub>3</sub>).

<sup>13</sup>C{<sup>1</sup>H} NMR (CDCl<sub>3</sub>, 150MHz, ppm): δ 176.62, 176.57, 172.84, 172.77, 153.72, 153.66, 145.80, 145.65, 143.16, 143.06, 142.03, 139.66, 134.96, 134.88, 129.05, 128.97, 128.43, 128.27, 128.09, 128.03, 127.17, 126.36, 126.30, 126.24, 121.70, 117.02, 116.99, 113.22, 113.19, 112.02, 111.47, 110.52, 110.48, 102.16, 101.37, 101.34, 99.01, 98.84, 70.56, 56.24, 56.21, 43.40, 42.00, 41.92, 39.23, 39.13, 32.43, 32.30, 27.40, 27.29, 26.95, 24.88, 16.58, 16.40, 15.43, 13.99.

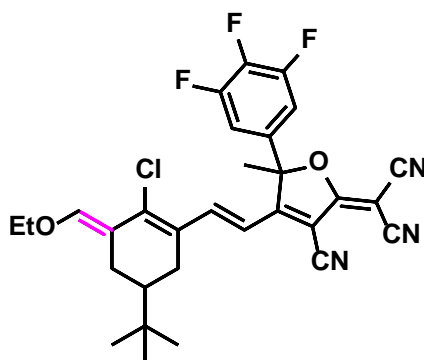

2-(4-((*E*)-2-((*E*)-5-(*tert*-butyl)-2-chloro-3-(ethoxymethylene)cyclohex-1-en-1-yl)vinyl)-3-cyano-5-methyl-5-(3,4,5-trifluorophenyl)furan-2(*5H*)-ylidene)malononitrile (**TCF-A5**)

dark red solid (554 mg , 63 %).

$^1\text{H}$  NMR ( $\text{CDCl}_3$ , 600MHz, ppm):  $\delta$  7.55 (t,  $J = 16.0$  Hz, 1H, =CH), 7.18 (s, 1H, =CH), 7.01 (dd,  $J = 12.1$ , 5.7 Hz, 2H,  $\text{CH}_{\text{Ar}}$ ), 6.45 (d,  $J = 15.7$  Hz, 1H, =CH), 4.11 (qd,  $J = 7.1$ , 3.3 Hz, 2H,  $\text{OCH}_2$ ), 2.89 (d,  $J = 14.9$  Hz, 1H,  $\text{CH}_2$ ), 2.61-2.49 (m, 1H,  $\text{CH}_2$ ), 2.11 (d,  $J = 3.4$  Hz, 3H,  $\text{CH}_3$ ), 2.05-1.97 (m, 1H,  $\text{CH}_2$ ), 1.82-1.75 (m, 1H,  $\text{CH}_2$ ), 1.40-1.31 (m, 4H, CH,  $\text{CH}_3$ ), 0.96 (s, 9H,  $\text{C}(\text{CH}_3)_3$ ).

$^{13}\text{C}\{^1\text{H}\}$  NMR ( $\text{CDCl}_3$ , 150MHz, ppm):  $\delta$  175.19, 171.98, 171.95, 154.66, 154.59, 152.53, 150.76, 146.20, 146.09, 144.13, 132.51, 128.33, 128.29, 117.22, 117.19, 112.47, 111.58, 111.26, 111.22, 111.11, 110.97, 110.19, 98.19, 98.14, 96.50, 70.84, 70.83, 57.68, 42.01, 41.90, 32.29, 27.41, 27.30, 27.27, 24.91, 24.89, 24.83, 24.78, 15.43.

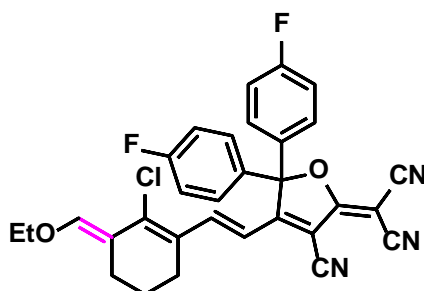

2-(4-((*E*)-2-((*E*)-2-chloro-3-(ethoxymethylene)cyclohex-1-en-1-yl)vinyl)-3-cyano-5,5-bis(4-fluorophenyl)furan-2(*5H*)-ylidene)malononitrile (**TCF-A6**)

dark red solid (672 mg , 89 %).

$^1\text{H}$  NMR ( $\text{CDCl}_3$ , 300MHz, ppm):  $\delta$  7.84 (d,  $J = 15.7$  Hz, 1H, =CH), 7.28 (dd,  $J = 5.0$ , 2.0 Hz, 3H,  $\text{CH}_{\text{Ar}}$ ), 7.26-7.23 (m, 1H,  $\text{CH}_{\text{Ar}}$ ), 7.18-7.11 (m, 5H, =CH,  $\text{CH}_{\text{Ar}}$ ), 6.54 (d,  $J = 15.7$  Hz, 1H, =CH), 4.09 (q,  $J = 7.1$  Hz, 2H,  $\text{OCH}_2$ ), 2.41 (dt,  $J = 11.4$ , 6.0 Hz, 4H,  $\text{CH}_2$ ), 1.83-1.63 (m, 2H,  $\text{CH}_2$ ), 1.34 (t,  $J = 7.1$  Hz, 3H,  $\text{CH}_3$ ).

$^{13}\text{C}\{^1\text{H}\}$  NMR ( $\text{CDCl}_3$ , 150MHz, ppm):  $\delta$  175.28, 170.62, 164.36, 162.69, 154.50, 146.80, 144.07, 132.37, 132.35, 130.25, 130.19, 129.49, 129.43, 128.19, 116.89, 116.74, 116.47, 116.39, 116.24, 114.47, 111.68, 111.05, 110.68, 102.00, 98.41, 70.72, 58.48, 57.35, 26.15, 23.67, 20.29, 18.44, 16.13, 15.41.

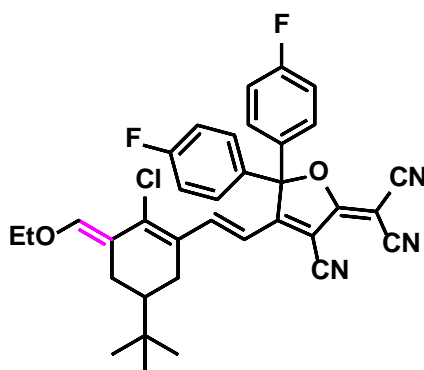

2-(4-((*E*)-2-((*E*)-5-(*tert*-butyl)-2-chloro-3-(ethoxymethylene)cyclohex-1-en-1-yl)vinyl)-3-cyano-5,5-bis(4-fluorophenyl)furan-2(*5H*)-ylidene)malononitrile (**TCF-A7**)

dark red solid (633 mg , 76 %).

$^1\text{H}$  NMR ( $\text{CDCl}_3$ , 300MHz, ppm):  $\delta$  7.76 (d,  $J = 15.7$  Hz, 1H, =CH), 7.32-7.26 (m, 3H,  $\text{CH}_{\text{Ar}}$ ), 7.24 (t,  $J = 2.6$  Hz, 1H,  $\text{CH}_{\text{Ar}}$ ), 7.21-7.08 (m, 5H, =CH,  $\text{CH}_{\text{Ar}}$ ), 6.57 (d,  $J = 15.7$  Hz, 1H, =CH), 4.09 (q,  $J = 7.1$  Hz, 2H,



OCH<sub>2</sub>), 2.87 (d, *J* = 14.8 Hz, 1H, CH<sub>2</sub>), 2.52 (d, *J* = 14.6 Hz, 1H, CH<sub>2</sub>), 1.99 (dd, *J* = 15.9, 12.0 Hz, 1H, CH<sub>2</sub>), 1.86-1.70 (m, 1H, CH<sub>2</sub>), 1.43-1.27 (m, 4H, CH, CH<sub>3</sub>), 0.95 (s, 9H, C(CH<sub>3</sub>)<sub>3</sub>).  
<sup>13</sup>C{<sup>1</sup>H} NMR (CDCl<sub>3</sub>, 100MHz, ppm): δ 175.25, 170.65, 164.74, 162.24, 154.46, 147.23, 144.04, 132.41, 132.38, 132.32, 132.29, 130.35, 130.27, 130.18, 128.38, 117.19, 116.41, 116.39, 116.19, 116.17, 114.22, 111.71, 111.10, 110.58, 102.00, 98.55, 70.76, 57.26, 41.88, 32.29, 27.30, 27.26, 24.85, 15.45.

### General Procedure for the synthesis of Chromophores TE-I-1 - TE-I-9 and TE-II-1 - TE-II-8

Acceptor units TCF-A1 - TCF-A7 (110 mg, 1.0 eq) and compound JD1-JD2 (1.1 eq) were mixed in 2 mL of acetic anhydride, and two drops of pyridine was added. The reaction mixture was allowed to stir at 80 °C for corresponding reaction time and monitored by TLC. After removal of the solvents, the crude product was purified by flash chromatography eluting with ethyl acetate/hexane to give a dark solid.

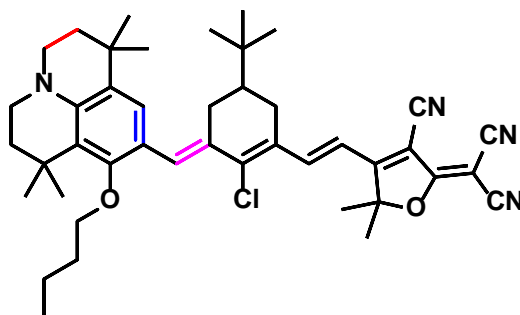

2-(4-((*E*)-2-((*E*)-3-((8-butoxy-1,1,7,7-tetramethyl-2,3,6,7-tetrahydro-1*H*,5*H*-pyrido[3,2-*ij*]quinolin-9-yl)methylene)-5-(*tert*-butyl)-2-chlorocyclohex-1-en-1-yl)vinyl)-3-cyano-5,5-dimethylfuran-2(*5H*)-ylidene)malononitrile (**TE-I-1**).

14 h, dark solid (5 mg, 3 %).

<sup>1</sup>H NMR (CD<sub>2</sub>Cl<sub>2</sub>, 600MHz, ppm): δ 8.23 (d, *J* = 15.8 Hz, 1H, =CH), 7.60 (s, 1H, =CH), 7.16 (s, 1H, CH<sub>Ar</sub>), 6.55 (d, *J* = 15.8 Hz, 1H, =CH), 3.87-3.71 (m, 2H, OCH<sub>2</sub>), 3.32-3.10 (m, 5H, NCH<sub>2</sub>, CH<sub>2</sub>), 2.72 (d, *J* = 14.6 Hz, 1H, CH<sub>2</sub>), 2.29 (dt, *J* = 15.8, 12.9 Hz, 2H, CH<sub>2</sub>), 1.84-1.70 (m, 12H, CH<sub>2</sub>, C(CH<sub>3</sub>)<sub>2</sub>), 1.53-1.49 (m, 2H, CH<sub>2</sub>), 1.41 (d, *J* = 9.4 Hz, 6H, C(CH<sub>3</sub>)<sub>2</sub>), 1.31-1.22 (m, 7H, CH, C(CH<sub>3</sub>)<sub>2</sub>), 1.02-0.92 (m, 12H, CH<sub>3</sub>, C(CH<sub>3</sub>)<sub>3</sub>).

<sup>13</sup>C{<sup>1</sup>H} NMR (CD<sub>2</sub>Cl<sub>2</sub>, 150MHz, ppm): 175.94, 174.21, 158.37, 146.13, 145.10, 144.41, 134.40, 130.71, 130.64, 126.66, 125.54, 122.39, 117.00, 113.87, 112.34, 111.73, 110.88, 97.51, 97.44, 75.41, 55.69, 47.34, 46.77, 43.03, 39.90, 36.24, 32.57, 32.26, 32.24, 32.10, 31.15, 30.48, 29.88, 29.73, 27.74, 27.10, 26.67, 26.59, 22.64, 19.44, 13.92, 13.86.

HR-MS calcd for C<sub>43</sub>H<sub>53</sub>ClN<sub>4</sub>O<sub>2</sub> [M+H]<sup>+</sup> m/z 693.39298, found m/z 693.39276.

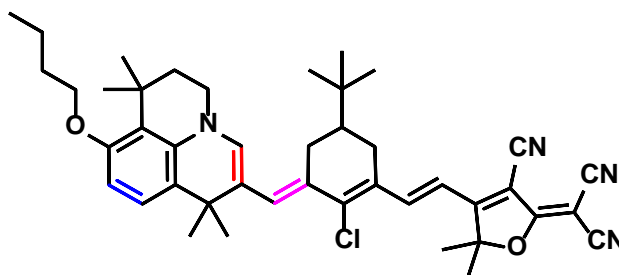

2-(4-((*E*)-2-((*E*)-3-((8-butoxy-1,1,7,7-tetramethyl-6,7-dihydro-1*H*,5*H*-pyrido[3,2-*ij*]quinolin-2-yl)methylene)-5-(*tert*-butyl)-2-chlorocyclohex-1-en-1-yl)vinyl)-3-cyano-5,5-dimethylfuran-2(*5H*)-ylidene)malononitrile

rile (**TE-II-1**).

14 h, dark solid (47 mg, 27 %).

$^1\text{H}$  NMR ( $\text{CD}_2\text{Cl}_2$ , 600MHz, ppm):  $\delta$  8.22 (d,  $J = 15.6$  Hz, 1H, =CH), 7.41 (s, 0.25H, =CH), 7.34 (s, 0.74H, =CH), 7.13 (dd,  $J = 13.5, 8.7$  Hz, 1H,  $\text{CH}_{\text{Ar}}$ ), 6.57 (t,  $J = 9.3$  Hz, 1H,  $\text{CH}_{\text{Ar}}$ ), 6.54-6.42 (m, 2H, =CH), 3.98 (dt,  $J = 17.0, 6.5$  Hz, 2H,  $\text{OCH}_2$ ), 3.65-3.47 (m, 2H,  $\text{NCH}_2$ ), 3.14 (d,  $J = 14.2$  Hz, 1H,  $\text{CH}_2$ ), 2.70 (d,  $J = 15.9$  Hz, 1H,  $\text{CH}_2$ ), 2.28-2.09 (m, 2H,  $\text{CH}_2$ ), 1.82 (dt,  $J = 9.9, 5.7$  Hz, 4H,  $\text{CH}_2$ ), 1.77 (s, 6H,  $\text{C}(\text{CH}_3)_2$ ), 1.57-1.48 (m, 4H, CH,  $\text{CH}_3$ ), 1.47-1.39 (m, 9H,  $\text{CH}_3$ ,  $\text{C}(\text{CH}_3)_2$ ), 1.30 (d,  $J = 4.9$  Hz, 2H,  $\text{CH}_2$ ), 1.02-0.98 (m, 12H,  $\text{CH}_3$ ,  $\text{C}(\text{CH}_3)_3$ ).

$^{13}\text{C}\{^1\text{H}\}$  NMR ( $\text{CD}_2\text{Cl}_2$ , 150MHz, ppm):  $\delta$  176.20, 173.86, 156.78, 156.25, 146.44, 144.98, 137.71, 136.33, 134.78, 134.16, 133.08, 130.36, 129.40, 125.36, 125.19, 124.72, 124.66, 119.67, 118.61, 117.95, 115.43, 112.70, 112.47, 112.29, 112.09, 111.33, 106.87, 106.51, 100.00, 97.19, 97.14, 95.56, 67.81, 54.58, 47.92, 47.63, 43.11, 43.07, 39.72, 36.68, 36.37, 36.13, 32.65, 32.42, 32.20, 32.11, 31.95, 31.58, 31.56, 31.54, 31.21, 30.96, 30.80, 29.40, 28.17, 28.14, 27.51, 27.13, 26.72, 26.70, 26.64, 26.61, 22.65, 19.72, 19.64, 13.88, 13.63.

HR-MS calcd for  $\text{C}_{43}\text{H}_{51}\text{ClN}_4\text{O}_2$   $[\text{M}+\text{H}]^+$   $m/z$  691.37733, found  $m/z$  691.37701.

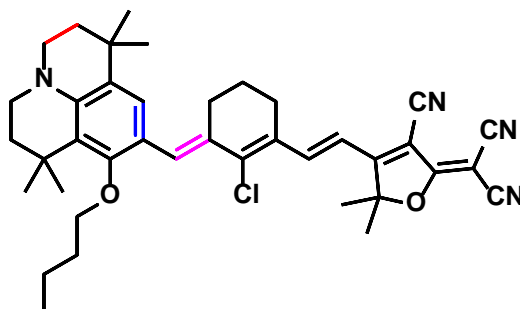

2-(4-(((*E*)-2-(((*E*)-3-((8-butoxy-1,1,7,7-tetramethyl-2,3,6,7-tetrahydro-1*H*,5*H*-pyrido[3,2,1-*ij*]quinolin-9-yl)methylene)-2-chlorocyclohex-1-en-1-yl)vinyl)-3-cyano-5,5-dimethylfuran-2(5*H*)-ylidene)malononitrile (**TE-I-2**).

14h, dark solid (7 mg, 4 %).

$^1\text{H}$  NMR ( $\text{CD}_2\text{Cl}_2$ , 300MHz, ppm):  $\delta$  8.19 (d,  $J = 15.9$  Hz, 1H, =CH), 7.59 (s, 1H, =CH), 7.10 (s, 1H,  $\text{CH}_{\text{Ar}}$ ), 6.56 (d,  $J = 15.8$  Hz, 1H, =CH), 3.79 (dd,  $J = 8.5, 4.8$  Hz, 2H,  $\text{OCH}_2$ ), 3.48-3.02 (m, 4H,  $\text{NCH}_2$ ), 2.83 (dd,  $J = 13.0, 7.6$  Hz, 2H,  $\text{CH}_2$ ), 2.61 (t,  $J = 6.0$  Hz, 2H,  $\text{CH}_2$ ), 1.91-1.68 (m, 14H,  $\text{CH}_2$ ,  $\text{C}(\text{CH}_3)_2$ ), 1.49 (dd,  $J = 10.1, 4.9$  Hz, 2H,  $\text{CH}_2$ ), 1.42 (d,  $J = 8.5$  Hz, 6H,  $\text{C}(\text{CH}_3)_2$ ), 1.25 (s, 6H,  $\text{C}(\text{CH}_3)_2$ ), 0.96 (t,  $J = 7.4$  Hz, 3H,  $\text{CH}_3$ ).

$^{13}\text{C}\{^1\text{H}\}$  NMR ( $\text{CD}_2\text{Cl}_2$ , 150MHz, ppm):  $\delta$  175.93, 175.75, 174.28, 174.23, 158.31, 157.47, 146.22, 144.88, 144.76, 144.43, 138.42, 134.70, 133.71, 133.50, 131.90, 131.56, 130.67, 130.27, 128.69, 126.80, 126.69, 125.53, 124.82, 123.21, 122.35, 121.44, 117.02, 115.07, 114.15, 112.32, 111.73, 111.44, 110.89, 110.65, 108.69, 99.99, 97.73, 97.54, 75.37, 75.11, 75.03, 55.70, 47.35, 46.77, 46.06, 45.69, 39.91, 39.79, 36.29, 35.83, 34.07, 33.41, 33.32, 33.17, 32.77, 32.55, 32.27, 32.20, 32.10, 31.58, 30.72, 29.81, 29.54, 29.14, 28.88, 26.70, 26.60, 26.55, 21.75, 21.71, 19.44, 19.39, 13.92.

HR-MS calcd for  $\text{C}_{39}\text{H}_{45}\text{ClN}_4\text{O}_2$   $[\text{M}+\text{H}]^+$   $m/z$  637.33038, found  $m/z$  637.33002.

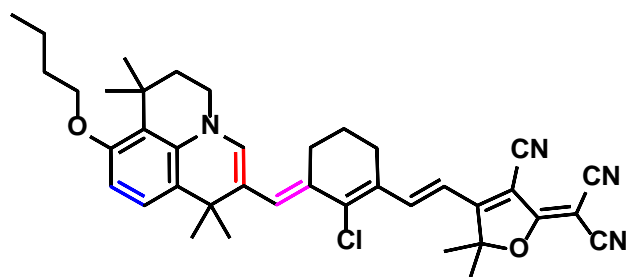

2-(4-((*E*)-2-((*E*)-3-((8-butoxy-1,1,7,7-tetramethyl-6,7-dihydro-1*H*,5*H*-pyrido[3,2,1-*ij*]quinolin-2-yl)methylene)-2-chlorocyclohex-1-en-1-yl)vinyl)-3-cyano-5,5-dimethylfuran-2(*5H*)-ylidene)malononitrile (**TE-II-2**).

14h, dark solid (40 mg , 22 %).

$^1\text{H}$  NMR ( $\text{CD}_2\text{Cl}_2$ , 300MHz, ppm):  $\delta$  8.18 (d,  $J = 15.6$  Hz, 1H, =CH), 7.36 (s, 1H, =CH), 7.14 (d,  $J = 8.7$  Hz, 1H,  $\text{CH}_{\text{Ar}}$ ), 6.51 (dd,  $J = 31.5, 12.0$  Hz, 3H, =CH,  $\text{CH}_{\text{Ar}}$ ), 3.96 (t,  $J = 6.4$  Hz, 2H,  $\text{OCH}_2$ ), 3.60-3.48 (m, 2H,  $\text{NCH}_2$ ), 2.77 (s, 2H,  $\text{CH}_2$ ), 2.57 (t,  $J = 5.7$  Hz, 2H,  $\text{CH}_2$ ), 1.89-1.71 (m, 12H,  $\text{CH}_2$ ,  $\text{C}(\text{CH}_3)_2$ ), 1.60-1.50 (m, 2H,  $\text{CH}_2$ ), 1.43 (d,  $J = 5.3$  Hz, 12H,  $\text{C}(\text{CH}_3)_2$ ), 0.99 (t,  $J = 7.4$  Hz, 3H,  $\text{CH}_3$ ).

$^{13}\text{C}\{^1\text{H}\}$  NMR ( $\text{CD}_2\text{Cl}_2$ , 100MHz, ppm):  $\delta$  176.21, 173.81, 156.76, 146.68, 144.78, 136.91, 136.63, 134.01, 129.48, 129.21, 124.77, 124.71, 119.74, 115.53, 112.76, 112.55, 112.15, 111.41, 106.59, 99.99, 97.15, 95.43, 67.80, 54.40, 47.64, 39.68, 36.30, 32.64, 32.24, 32.10, 31.53, 30.87, 29.87, 28.12, 26.66, 26.26, 21.48, 19.72, 19.64, 13.64.

HR-MS calcd for  $\text{C}_{39}\text{H}_{43}\text{ClN}_4\text{O}_2$   $[\text{M}+\text{H}]^+$   $m/z$  635.31473, found  $m/z$  635.31439.

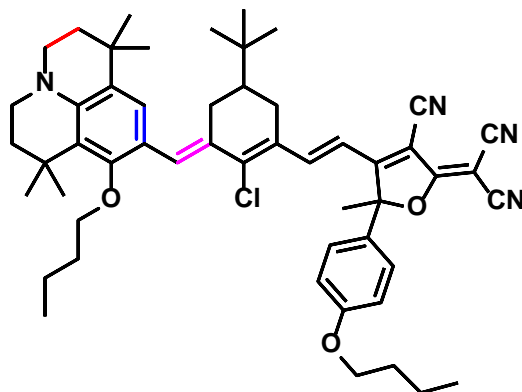

2-(4-((*E*)-2-((*E*)-3-((8-butoxy-1,1,7,7-tetramethyl-2,3,6,7-tetrahydro-1*H*,5*H*-pyrido[3,2,1-*ij*]quinolin-9-yl)methylene)-5-(*tert*-butyl)-2-chlorocyclohex-1-en-1-yl)vinyl)-5-(4-butoxyphenyl)-3-cyano-5-methylfuran-2(*5H*)-ylidene)malononitrile (**TE-I-3**).

13.5 h, dark solid (17 mg , 11 %).

$^1\text{H}$  NMR ( $\text{CD}_2\text{Cl}_2$ , 300MHz, ppm):  $\delta$  7.73 (dd,  $J = 15.7, 6.5$  Hz, 1H, =CH), 7.52 (s, 1H, =CH), 7.33 (dd,  $J = 8.9, 2.9$  Hz, 2H,  $\text{CH}_{\text{Ar}}$ ), 7.13 (d,  $J = 5.9$  Hz, 1H,  $\text{CH}_{\text{Ar}}$ ), 6.99 (dd,  $J = 8.8, 5.4$  Hz, 2H,  $\text{CH}_{\text{Ar}}$ ), 6.62 (d,  $J = 15.7$  Hz, 1H, =CH), 4.01 (q,  $J = 6.1$  Hz, 2H,  $\text{OCH}_2$ ), 3.89-3.68 (m, 2H,  $\text{OCH}_2$ ), 3.34-3.10 (m, 5H,  $\text{NCH}_2$ ,  $\text{CH}_2$ ), 2.66 (d,  $J = 15.4$  Hz, 1H,  $\text{CH}_2$ ), 2.36-2.13 (m, 5H,  $\text{CH}_2$ ,  $\text{CH}_3$ ), 1.89-1.68 (m, 8H,  $\text{CH}_2$ ), 1.52 (dd,  $J = 14.9, 7.5$  Hz, 4H,  $\text{CH}_2$ ), 1.43 (d,  $J = 5.5$  Hz, 6H,  $\text{C}(\text{CH}_3)_2$ ), 1.33-1.21 (m, 7H, CH,  $\text{C}(\text{CH}_3)_2$ ), 1.06-0.89 (m, 15H,  $\text{CH}_3$ ,  $\text{C}(\text{CH}_3)_3$ ).

$^{13}\text{C}\{^1\text{H}\}$  NMR ( $\text{CD}_2\text{Cl}_2$ , 150MHz, ppm):  $\delta$  176.04, 176.01, 173.88, 173.84, 160.71, 160.69, 158.36, 146.68, 146.52, 146.15, 146.13, 144.41, 134.37, 130.73, 130.71, 127.59, 127.52, 127.45, 126.64, 125.53, 122.35, 116.98, 115.15, 115.12, 114.08, 112.24, 111.80, 110.74, 99.02, 98.05, 75.36, 68.00, 55.97, 55.94, 47.33,

46.76, 43.00, 42.90, 39.89, 36.22, 32.55, 32.22, 32.18, 32.07, 31.16, 31.14, 31.12, 30.44, 29.86, 29.71, 29.69, 27.64, 27.56, 27.07, 24.69, 24.63, 19.41, 19.37, 19.17, 19.15, 13.91, 13.88, 13.58.

HR-MS calcd for C<sub>52</sub>H<sub>63</sub>ClN<sub>4</sub>O<sub>3</sub> [M+H]<sup>+</sup> m/z 827.46615, found m/z 827.46582.

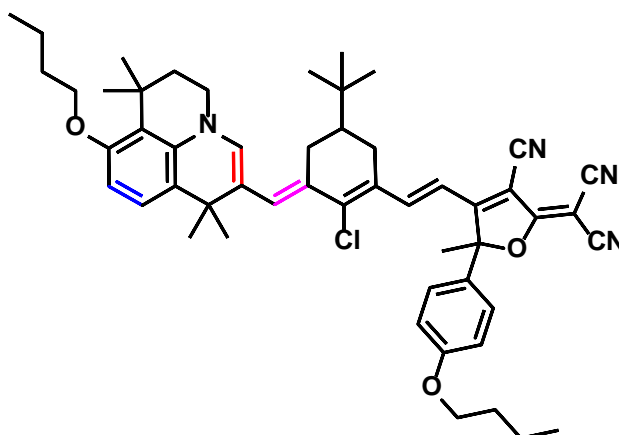

2-(4-((*E*)-2-((*E*)-3-((8-butoxy-1,1,7,7-tetramethyl-6,7-dihydro-1*H*,5*H*-pyrido[3,2,1-*ij*]quinolin-2-yl)methylene)-5-(*tert*-butyl)-2-chlorocyclohex-1-en-1-yl)vinyl)-5-(4-butoxyphenyl)-3-cyano-5-methylfuran-2(5*H*)-ylidene)malononitrile (**TE-II-3**).

13.5 h, dark solid (40 mg, 25 %).

<sup>1</sup>H NMR (CDCl<sub>3</sub>, 300MHz, ppm): δ 7.70-7.45 (m, 1H, =CH), 7.22 (dd, *J* = 10.5, 7.7 Hz, 3H, CH<sub>Ar</sub>, =CH), 7.12 (d, *J* = 8.6 Hz, 1H, CH<sub>Ar</sub>), 6.92 (dd, *J* = 8.8, 3.7 Hz, 2H, CH<sub>Ar</sub>), 6.69-6.15 (m, 3H, CH<sub>Ar</sub>, =CH), 4.12-3.87 (m, 4H, OCH<sub>2</sub>), 3.49 (s, 2H, NCH<sub>2</sub>), 3.15-2.89 (m, 1H, CH<sub>2</sub>), 2.56 (d, *J* = 15.3 Hz, 1H, CH<sub>2</sub>), 2.21-1.91 (m, 5H, CH<sub>2</sub>, CH<sub>3</sub>), 1.71-1.86 (m, 6H, CH<sub>2</sub>), 1.58-1.49 (m, 4H, CH<sub>2</sub>), 1.45 (t, *J* = 3.4 Hz, 6H, C(CH<sub>3</sub>)<sub>2</sub>), 1.39 (dd, *J* = 10.4, 5.1 Hz, 6H, C(CH<sub>3</sub>)<sub>2</sub>), 1.30 (d, *J* = 2.6 Hz, 1H, CH), 1.05-0.85 (m, 15H, CH<sub>3</sub>, C(CH<sub>3</sub>)<sub>3</sub>).

<sup>13</sup>C{<sup>1</sup>H} NMR (CD<sub>2</sub>Cl<sub>2</sub>, 150MHz, ppm): δ 176.25, 173.53, 160.56, 156.77, 146.48, 146.43, 137.74, 136.43, 136.36, 136.04, 134.07, 130.34, 130.28, 129.47, 127.95, 127.84, 127.62, 127.54, 125.37, 124.71, 124.66, 119.72, 115.52, 115.09, 112.71, 112.62, 112.18, 111.15, 106.56, 98.64, 96.13, 67.99, 67.81, 54.78, 47.66, 43.03, 42.93, 39.68, 36.64, 36.34, 36.10, 32.64, 32.40, 32.14, 32.09, 31.98, 31.90, 31.53, 31.17, 31.15, 30.93, 30.77, 29.40, 28.14, 27.40, 27.28, 27.09, 24.75, 24.69, 19.71, 19.63, 19.16, 13.62, 13.58.

HR-MS calcd for C<sub>52</sub>H<sub>61</sub>ClN<sub>4</sub>O<sub>3</sub> [M+H]<sup>+</sup> m/z 825.45050, found m/z 825.45020.

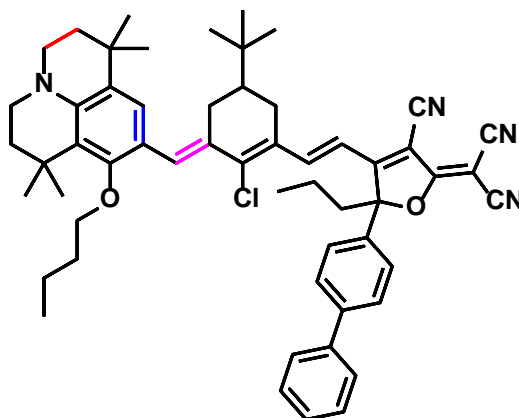

2-(5-([1,1'-biphenyl]-4-yl)-4-((*E*)-2-((*E*)-3-((8-butoxy-1,1,7,7-tetramethyl-2,3,6,7-tetrahydro-1*H*,5*H*-pyrid

o[3,2,1-*ij*]quinolin-9-yl)methylene)-5-(*tert*-butyl)-2-chlorocyclohex-1-en-1-yl)vinyl)-3-cyano-5-propylfuran-2(5*H*)-ylidene)malononitrile (**TE-I-4**).

6.5h, dark solid (30 mg , 19 %).

<sup>1</sup>H NMR (CDCl<sub>3</sub>, 300MHz, ppm): δ 7.79 (d, *J* = 15.6 Hz, 1H, =CH), 7.66 (t, *J* = 8.1 Hz, 2H, CH<sub>Ar</sub>), 7.56 (dd, *J* = 14.8, 7.9 Hz, 3H, CH<sub>Ar</sub>, =CH), 7.50-7.33 (m, 5H, CH<sub>Ar</sub>), 7.08 (d, *J* = 7.2 Hz, 1H, CH<sub>Ar</sub>), 6.59 (dd, *J* = 15.6, 5.7 Hz, 1H, =CH), 3.76 (dd, *J* = 13.1, 6.4 Hz, 2H, OCH<sub>2</sub>), 3.18 (t, *J* = 15.5 Hz, 5H, NCH<sub>2</sub>, CH<sub>2</sub>), 2.73 (dd, *J* = 17.9, 7.7 Hz, 1H, CH<sub>2</sub>), 2.54 (dd, *J* = 28.8, 14.7 Hz, 2H, CH<sub>2</sub>), 2.16 (dd, *J* = 28.0, 15.3 Hz, 2H, CH<sub>2</sub>), 1.78 (d, *J* = 14.5 Hz, 6H, CH<sub>2</sub>), 1.52-1.36 (m, 10H, CH<sub>2</sub>, C(CH<sub>3</sub>)<sub>2</sub>), 1.23 (dd, *J* = 21.3, 5.5 Hz, 7H, CH, C(CH<sub>3</sub>)<sub>2</sub>), 1.07 (t, *J* = 7.4 Hz, 3H, CH<sub>3</sub>), 0.99-0.88 (m, 12H, CH<sub>3</sub>, C(CH<sub>3</sub>)<sub>3</sub>).

<sup>13</sup>C{<sup>1</sup>H} NMR (CD<sub>2</sub>Cl<sub>2</sub>, 150MHz, ppm): δ 176.72, 176.67, 172.33, 172.29, 158.43, 146.48, 146.28, 146.11, 144.49, 143.04, 143.02, 139.69, 139.67, 135.25, 135.14, 134.60, 130.71, 130.69, 128.91, 128.89, 128.00, 127.94, 127.08, 126.65, 126.49, 126.39, 125.54, 122.35, 116.99, 114.11, 114.08, 112.15, 111.78, 110.72, 110.69, 101.41, 98.78, 98.60, 75.41, 55.72, 55.70, 47.34, 46.76, 42.95, 42.85, 39.86, 39.08, 38.99, 36.19, 32.54, 32.23, 32.19, 32.07, 31.58, 31.09, 30.43, 30.40, 29.84, 29.68, 27.65, 27.54, 27.07, 22.65, 19.41, 19.35, 16.41, 13.90, 13.87, 13.85, 13.69.

HR-MS calcd for C<sub>56</sub>H<sub>63</sub>ClN<sub>4</sub>O<sub>2</sub> [M+H]<sup>+</sup> m/z 859.47123, found m/z 859.47076.

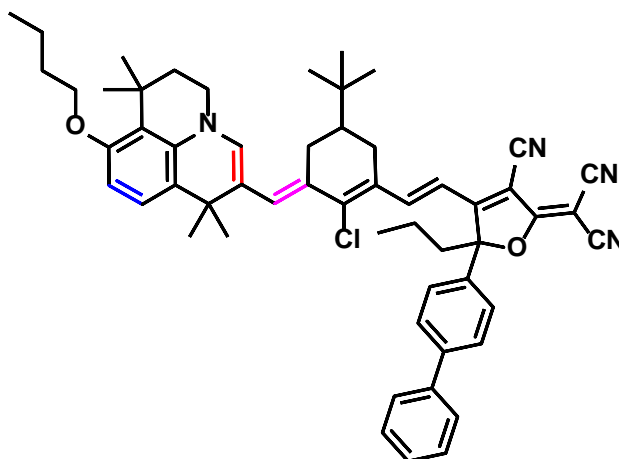

2-(5-([1,1'-biphenyl]-4-yl)-4-((*E*)-2-((*E*)-3-((8-butoxy-1,1,7,7-tetramethyl-6,7-dihydro-1*H*,5*H*-pyrido[3,2,1-*ij*]quinolin-2-yl)methylene)-5-(*tert*-butyl)-2-chlorocyclohex-1-en-1-yl)vinyl)-3-cyano-5-propylfuran-2(5*H*)-ylidene)malononitrile (**TE-II-4**).

6.5h, dark solid (17 mg , 11 %).

<sup>1</sup>H NMR (CD<sub>2</sub>Cl<sub>2</sub>, 300MHz, ppm): δ 7.85 (d, *J* = 15.4 Hz, 1H, =CH), 7.74 (dd, *J* = 8.5, 3.9 Hz, 2H, CH<sub>Ar</sub>), 7.66 (t, *J* = 6.0 Hz, 2H, CH<sub>Ar</sub>), 7.50 (ddd, *J* = 12.0, 6.2, 4.1 Hz, 4H, CH<sub>Ar</sub>), 7.46-7.40 (m, 1H, CH<sub>Ar</sub>), 7.33 (d, *J* = 19.3 Hz, 1H, =CH), 7.15 (dd, *J* = 8.7, 2.2 Hz, 1H, CH<sub>Ar</sub>), 6.68-6.41 (m, 3H, CH<sub>Ar</sub>, =CH), 4.00 (dd, *J* = 11.8, 5.5 Hz, 2H, OCH<sub>2</sub>), 3.55 (dd, *J* = 11.3, 5.2 Hz, 2H, NCH<sub>2</sub>), 3.09 (d, *J* = 13.9 Hz, 1H, CH<sub>2</sub>), 2.84-2.43 (m, 3H, CH<sub>2</sub>), 2.15 (ddd, *J* = 28.6, 18.5, 8.4 Hz, 2H, CH<sub>2</sub>), 1.92-1.78 (m, 4H, CH<sub>2</sub>), 1.62-1.53 (m, 2H, CH<sub>2</sub>), 1.49-1.30 (m, 15H, CH, CH<sub>2</sub>, C(CH<sub>3</sub>)<sub>2</sub>), 1.12-0.95 (m, 16H, CH<sub>3</sub>, C(CH<sub>3</sub>)<sub>3</sub>).

<sup>13</sup>C{<sup>1</sup>H} NMR (CD<sub>2</sub>Cl<sub>2</sub>, 150MHz, ppm): δ 176.92, 171.81, 156.77, 146.82, 145.90, 142.81, 139.71, 138.76, 136.74, 135.55, 134.00, 130.34, 129.42, 128.96, 128.92, 128.05, 127.98, 127.83, 127.09, 126.50, 126.41, 125.40, 124.75, 119.79, 115.72, 112.71, 112.19, 111.15, 106.66, 101.03, 96.82, 67.82, 54.48, 48.02, 47.72, 42.99, 42.90, 42.01, 39.68, 39.19, 36.65, 36.36, 36.10, 32.65, 32.50, 32.16, 32.10, 31.99, 31.59, 31.53, 30.92, 30.77, 29.39, 28.12, 27.29, 27.11, 26.90, 25.44, 22.66, 20.52, 19.71, 19.63, 16.40, 13.89, 13.73,

13.63.

HR-MS calcd for C<sub>56</sub>H<sub>61</sub>ClN<sub>4</sub>O<sub>2</sub> [M+H]<sup>+</sup> m/z 857.45558, found m/z 857.45514.

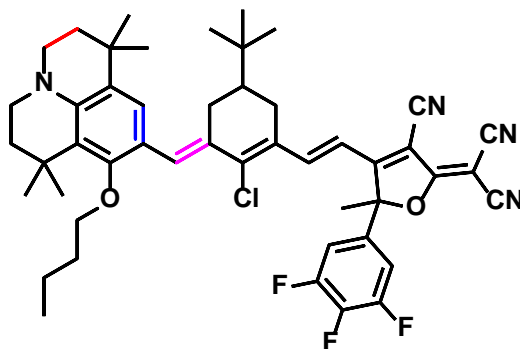

2-(4-((*E*)-2-((*E*)-3-((8-butoxy-1,1,7,7-tetramethyl-2,3,6,7-tetrahydro-1*H*,5*H*-pyrido[3,2,1-*ij*]quinolin-9-yl)methylene)-5-(*tert*-butyl)-2-chlorocyclohex-1-en-1-yl)vinyl)-3-cyano-5-methyl-5-(3,4,5-trifluorophenyl)furan-2(5*H*)-ylidene)malononitrile (**TE-I-5**).

2h, dark solid (51 mg, 32 %).

<sup>1</sup>H NMR (CD<sub>2</sub>Cl<sub>2</sub>, 300MHz, ppm): δ 7.67 (dd, *J* = 15.6, 3.4 Hz, 1H, =CH), 7.59 (s, 1H, =CH), 7.15 (d, *J* = 3.6 Hz, 1H, CH<sub>Ar</sub>), 7.10 (t, *J* = 7.2 Hz, 2H, CH<sub>Ar</sub>), 6.54 (d, *J* = 15.6 Hz, 1H, =CH), 3.75 (dt, *J* = 8.9, 4.4 Hz, 2H, OCH<sub>2</sub>), 3.33-3.09 (m, 5H, CH<sub>2</sub>, NCH<sub>2</sub>), 2.64 (d, *J* = 14.3 Hz, 1H, CH<sub>2</sub>), 2.36-2.08 (m, 5H, CH<sub>2</sub>, CH<sub>3</sub>), 1.84-1.68 (m, 6H, CH<sub>2</sub>), 1.50-1.44 (m, 2H, CH<sub>2</sub>), 1.40 (d, *J* = 7.0 Hz, 6H, C(CH<sub>3</sub>)<sub>2</sub>), 1.29-1.19 (m, 7H, CH, C(CH<sub>3</sub>)<sub>2</sub>), 0.99-0.91 (m, 12H, CH<sub>3</sub>, C(CH<sub>3</sub>)<sub>3</sub>).

<sup>13</sup>C{<sup>1</sup>H} NMR (CD<sub>2</sub>Cl<sub>2</sub>, 150MHz, ppm): δ 175.42, 171.40, 158.81, 152.41, 150.78, 147.61, 146.60, 146.49, 144.94, 135.66, 130.58, 126.71, 125.71, 122.41, 117.02, 113.10, 111.91, 111.43, 111.35, 111.31, 110.56, 97.41, 97.33, 96.53, 75.75, 75.73, 56.72, 47.39, 46.80, 42.96, 42.87, 39.72, 36.03, 32.53, 32.24, 32.20, 32.06, 31.58, 30.96, 30.58, 30.24, 29.78, 29.58, 27.59, 27.47, 27.08, 24.57, 24.51, 22.65, 19.42, 19.39, 13.88, 13.79.

HR-MS calcd for C<sub>48</sub>H<sub>52</sub>ClF<sub>3</sub>N<sub>4</sub>O<sub>2</sub> [M+H]<sup>+</sup> m/z 809.38037, found m/z 809.38007.

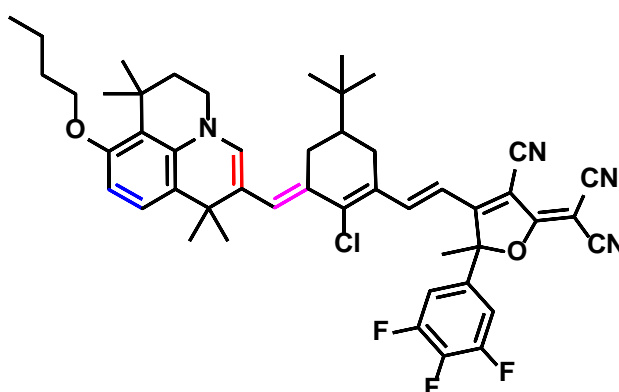

2-(4-((*E*)-2-((*E*)-3-((8-butoxy-1,1,7,7-tetramethyl-6,7-dihydro-1*H*,5*H*-pyrido[3,2,1-*ij*]quinolin-2-yl)methylene)-5-(*tert*-butyl)-2-chlorocyclohex-1-en-1-yl)vinyl)-3-cyano-5-methyl-5-(3,4,5-trifluorophenyl)furan-2(5*H*)-ylidene)malononitrile (**TE-II-5**).

2h, dark solid (8 mg, 5 %).

<sup>1</sup>H NMR (CD<sub>2</sub>Cl<sub>2</sub>, 300MHz, ppm): δ 7.61 (dd, *J* = 15.3, 7.3 Hz, 1H, =CH), 7.42 (d, *J* = 18.8 Hz, 1H, =CH), 7.19-7.03 (m, 3H, CH<sub>Ar</sub>), 6.62 (dd, *J* = 17.7, 9.5 Hz, 2H, =CH, CH<sub>Ar</sub>), 6.43 (d, *J* = 15.3 Hz, 1H, =CH), 3.96

(t,  $J = 6.5$  Hz, 2H, OCH<sub>2</sub>), 3.57 (dt,  $J = 13.6, 6.6$  Hz, 2H, NCH<sub>2</sub>), 3.03 (d,  $J = 13.9$  Hz, 1H, CH<sub>2</sub>), 2.63 (d,  $J = 15.7$  Hz, 1H, CH<sub>2</sub>), 2.19-2.05 (m, 5H, CH<sub>2</sub>, CH<sub>3</sub>), 1.87-1.75 (m, 4H, CH<sub>2</sub>), 1.61-1.49 (m, 2H, CH<sub>2</sub>), 1.48-1.28 (m, 13H, CH, C(CH<sub>3</sub>)<sub>2</sub>), 1.02-0.95 (m, 12H, CH<sub>3</sub>, C(CH<sub>3</sub>)<sub>3</sub>).

<sup>13</sup>C{<sup>1</sup>H} NMR (CD<sub>2</sub>Cl<sub>2</sub>, 100MHz, ppm): δ 175.73, 170.58, 156.80, 156.15, 152.78, 150.21, 147.97, 145.97, 145.87, 138.60, 138.29, 138.19, 133.44, 133.39, 130.20, 130.14, 129.29, 129.23, 125.78, 125.58, 125.17, 125.14, 124.93, 120.30, 120.27, 116.97, 116.91, 112.51, 112.02, 111.47, 111.40, 111.29, 111.24, 111.20, 107.79, 107.26, 95.97, 94.51, 67.87, 54.82, 48.55, 48.18, 42.93, 42.82, 39.54, 36.71, 36.45, 36.00, 32.79, 32.70, 32.50, 32.40, 32.14, 31.49, 31.30, 31.24, 30.85, 30.73, 29.66, 28.03, 27.97, 27.27, 27.12, 24.63, 24.58, 19.71, 19.63, 13.89, 13.62.

HR-MS calcd for C<sub>48</sub>H<sub>50</sub>ClF<sub>3</sub>N<sub>4</sub>O<sub>2</sub> [M+H]<sup>+</sup> m/z 807.36472, found m/z 807.36420.

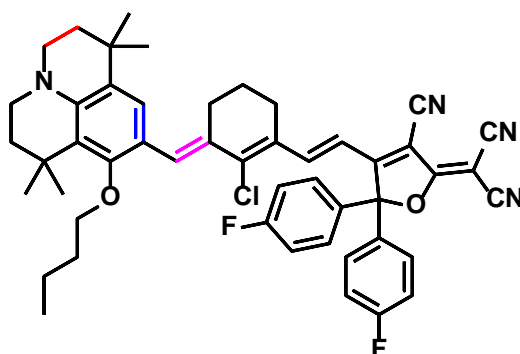

2-(4-((*E*)-2-((*E*)-3-((8-butoxy-1,1,7,7-tetramethyl-2,3,6,7-tetrahydro-1*H*,5*H*-pyrido[3,2-*ij*]quinolin-9-yl)methylene)-2-chlorocyclohex-1-en-1-yl)vinyl)-3-cyano-5,5-bis(4-fluorophenyl)furan-2(5*H*)-ylidene)malononitrile (**TE-I-6**).

3h, dark solid (34 mg, 21 %).

<sup>1</sup>H NMR (CD<sub>2</sub>Cl<sub>2</sub>, 300MHz, ppm): δ 7.96 (d,  $J = 15.6$  Hz, 1H, =CH), 7.59 (s, 1H, =CH), 7.37 (ddd,  $J = 8.2, 5.1, 2.6$  Hz, 4H, CH<sub>Ar</sub>), 7.26-7.08 (m, 5H, CH<sub>Ar</sub>), 6.67 (d,  $J = 15.6$  Hz, 1H, =CH), 3.77 (t,  $J = 6.7$  Hz, 2H, OCH<sub>2</sub>), 3.41-3.08 (m, 4H, NCH<sub>2</sub>), 2.88-2.72 (m, 2H, CH<sub>2</sub>), 2.54 (t,  $J = 6.0$  Hz, 2H, CH<sub>2</sub>), 1.90-1.66 (m, 8H, CH<sub>2</sub>), 1.50 (dd,  $J = 15.0, 7.4$  Hz, 2H, CH<sub>2</sub>), 1.42 (s, 6H, C(CH<sub>3</sub>)<sub>2</sub>), 1.26 (s, 6H, C(CH<sub>3</sub>)<sub>2</sub>), 0.97 (t,  $J = 7.4$  Hz, 3H, CH<sub>3</sub>).

<sup>13</sup>C{<sup>1</sup>H} NMR (CD<sub>2</sub>Cl<sub>2</sub>, 150MHz, ppm): δ 175.46, 170.00, 164.36, 162.70, 158.69, 147.67, 147.20, 144.88, 135.84, 132.61, 132.59, 130.74, 130.43, 130.38, 130.26, 126.72, 125.67, 122.35, 117.07, 116.18, 116.04, 115.14, 111.94, 111.50, 111.02, 101.95, 97.75, 75.62, 56.44, 47.39, 46.79, 39.74, 36.10, 32.51, 32.21, 32.05, 30.51, 29.69, 29.17, 26.43, 21.62, 19.37, 13.86.

HR-MS calcd for C<sub>49</sub>H<sub>47</sub>ClF<sub>2</sub>N<sub>4</sub>O<sub>2</sub> [M+H]<sup>+</sup> m/z 797.34284, found m/z 797.34247.

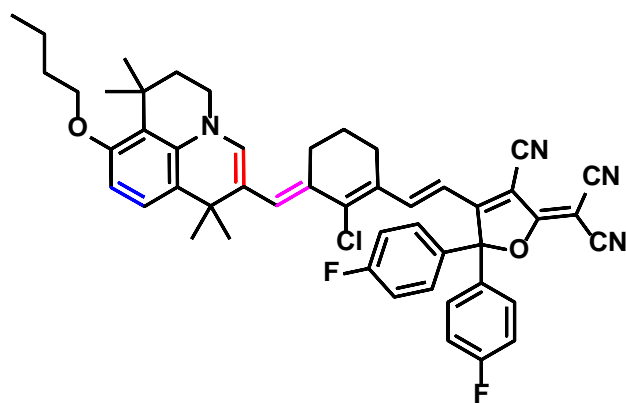

2-(4-((*E*)-2-((*E*)-3-((8-butoxy-1,1,7,7-tetramethyl-2,3,6,7-tetrahydro-1*H*,5*H*-pyrido[3,2-*ij*]quinolin-9-yl)methylene)-2-chlorocyclohex-1-en-1-yl)vinyl)-3-cyano-5,5-bis(4-fluorophenyl)furan-2(5*H*)-ylidene)malononitrile (**TE-II-6**).

3h, dark solid (16 mg, 10 %).

$^1\text{H}$  NMR ( $\text{CD}_2\text{Cl}_2$ , 300MHz, ppm):  $\delta$  7.89 (d,  $J = 15.2$  Hz, 1H, =CH), 7.43 (s, 1H, =CH), 7.37 (ddd,  $J = 8.2, 5.2, 2.6$  Hz, 4H,  $\text{CH}_{\text{Ar}}$ ), 7.25-7.13 (m, 5H,  $\text{CH}_{\text{Ar}}$ ), 6.73 (s, 1H, =CH), 6.63 (d,  $J = 8.8$  Hz, 1H,  $\text{CH}_{\text{Ar}}$ ), 6.56 (d,  $J = 15.2$  Hz, 1H, =CH), 4.00 (t,  $J = 6.5$  Hz, 2H,  $\text{OCH}_2$ ), 3.66-3.53 (m, 2H,  $\text{NCH}_2$ ), 2.74 (t,  $J = 5.5$  Hz, 2H,  $\text{CH}_2$ ), 2.52 (t,  $J = 5.9$  Hz, 2H,  $\text{CH}_2$ ), 1.85 (tt,  $J = 11.1, 5.6$  Hz, 6H,  $\text{CH}_2$ ), 1.63-1.53 (m, 2H,  $\text{CH}_2$ ), 1.46 (d,  $J = 12.0$  Hz, 12H,  $\text{C}(\text{CH}_3)_2$ ), 1.03 (t,  $J = 7.4$  Hz, 3H,  $\text{CH}_3$ ).

$^{13}\text{C}\{^1\text{H}\}$  NMR ( $\text{CD}_2\text{Cl}_2$ , 150MHz, ppm):  $\delta$  175.75, 168.96, 164.23, 162.57, 156.80, 156.14, 148.25, 146.62, 140.41, 138.84, 138.60, 137.25, 133.33, 133.12, 133.10, 132.26, 130.41, 130.35, 129.56, 129.21, 125.88, 125.58, 125.27, 124.90, 120.38, 119.41, 117.08, 116.02, 115.87, 113.21, 112.58, 112.15, 111.72, 107.89, 107.37, 101.26, 94.55, 67.88, 54.31, 48.53, 48.16, 39.55, 36.65, 36.40, 36.04, 32.69, 32.61, 32.14, 31.57, 31.50, 31.12, 30.79, 30.34, 30.11, 27.99, 26.02, 22.64, 21.33, 19.69, 19.61, 13.86, 13.60.

HR-MS calcd for  $\text{C}_{49}\text{H}_{45}\text{ClF}_2\text{N}_4\text{O}_2$   $[\text{M}+\text{H}]^+$   $m/z$  795.32719, found  $m/z$  795.44165.

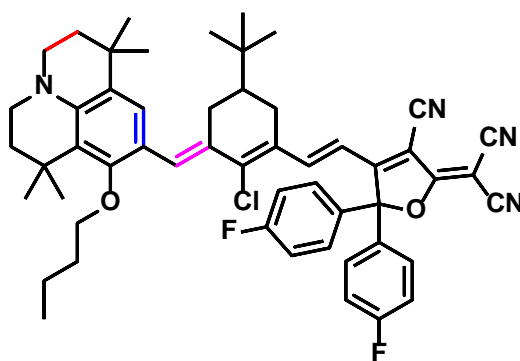

2-(4-((*E*)-2-((*E*)-3-((8-butoxy-1,1,7,7-tetramethyl-2,3,6,7-tetrahydro-1*H*,5*H*-pyrido[3,2-*ij*]quinolin-9-yl)methylene)-5-(*tert*-butyl)-2-chlorocyclohex-1-en-1-yl)vinyl)-3-cyano-5,5-bis(4-fluorophenyl)furan-2(5*H*)-ylidene)malononitrile (**TE-I-7**).

1h, dark solid (41 mg, 26 %).

$^1\text{H}$  NMR ( $\text{CD}_2\text{Cl}_2$ , 300MHz, ppm):  $\delta$  7.87 (d,  $J = 15.6$  Hz, 1H, =CH), 7.55 (s, 1H, =CH), 7.40-7.28 (m, 4H,  $\text{CH}_{\text{Ar}}$ ), 7.18 (ddd,  $J = 13.3, 6.1, 3.9$  Hz, 5H,  $\text{CH}_{\text{Ar}}$ ), 6.66 (d,  $J = 15.6$  Hz, 1H, =CH), 3.73 (dd,  $J = 11.2, 6.7$  Hz, 2H,  $\text{OCH}_2$ ), 3.32-3.08 (m, 5H,  $\text{CH}_2$ ,  $\text{NCH}_2$ ), 2.62 (d,  $J = 14.4$  Hz, 1H,  $\text{CH}_2$ ), 2.33-2.07 (m, 2H,  $\text{CH}_2$ ), 1.82-1.65 (m, 6H,  $\text{CH}_2$ ), 1.46 (dd,  $J = 15.1, 7.4$  Hz, 2H,  $\text{CH}_2$ ), 1.39 (d,  $J = 6.3$  Hz, 6H,  $\text{C}(\text{CH}_3)_2$ ), 1.23 (d,  $J = 19.6$  Hz, 7H, CH,  $\text{C}(\text{CH}_3)_2$ ), 1.00-0.88 (m, 12H,  $\text{CH}_3$ ,  $\text{C}(\text{CH}_3)_3$ ).



$^{13}\text{C}\{^1\text{H}\}$  NMR ( $\text{CD}_2\text{Cl}_2$ , 150MHz, ppm):  $\delta$  175.44, 169.98, 164.37, 164.35, 162.71, 162.69, 158.75, 147.54, 147.50, 144.88, 135.55, 132.66, 132.63, 132.59, 132.57, 130.76, 130.70, 130.52, 130.46, 130.43, 130.37, 126.71, 125.69, 122.39, 117.04, 116.17, 116.02, 114.91, 111.96, 111.52, 110.94, 101.93, 97.82, 75.66, 56.39, 47.38, 46.80, 42.86, 39.73, 36.05, 32.53, 32.21, 32.19, 32.06, 30.97, 30.54, 30.26, 29.77, 29.60, 27.52, 27.06, 19.38, 13.87.

HR-MS calcd for  $\text{C}_{53}\text{H}_{55}\text{ClF}_2\text{N}_4\text{O}_2$   $[\text{M}+\text{H}]^+$   $m/z$  853.40544, found  $m/z$  853.40521.

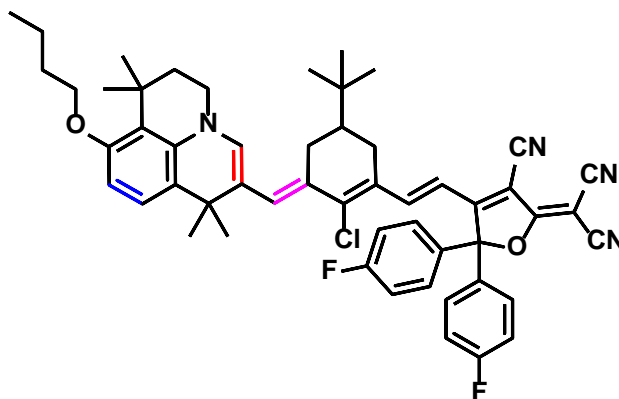

2-(4-((*E*)-2-((*E*)-3-((8-butoxy-1,1,7,7-tetramethyl-6,7-dihydro-1*H*,5*H*-pyrido[3,2,1-*ij*]quinolin-2-yl)methylene)-5-(*tert*-butyl)-2-chlorocyclohex-1-en-1-yl)vinyl)-3-cyano-5,5-bis(4-fluorophenyl)furan-2(5*H*)-ylidene)malononitrile (**TE-II-7**).

1h, dark solid (3 mg, 2 %).

$^1\text{H}$  NMR ( $\text{CD}_2\text{Cl}_2$ , 300MHz, ppm):  $\delta$  7.80 (d,  $J = 15.2$  Hz, 1H, =CH), 7.40-7.27 (m, 5H, =CH,  $\text{CH}_{\text{Ar}}$ ), 7.22-7.08 (m, 5H,  $\text{CH}_{\text{Ar}}$ ), 6.67-6.51 (m, 3H, =CH,  $\text{CH}_{\text{Ar}}$ ), 3.96 (t,  $J = 6.5$  Hz, 2H,  $\text{OCH}_2$ ), 3.65-3.46 (m, 2H,  $\text{NCH}_2$ ), 3.01 (d,  $J = 13.7$  Hz, 1H,  $\text{CH}_2$ ), 2.61 (d,  $J = 14.2$  Hz, 1H,  $\text{CH}_2$ ), 2.19-2.03 (m, 2H,  $\text{CH}_2$ ), 1.88-1.74 (m, 4H,  $\text{CH}_2$ ), 1.59-1.49 (m, 2H,  $\text{CH}_2$ ), 1.47-1.36 (m, 13H, CH,  $\text{C}(\text{CH}_3)_2$ ), 1.03-0.91 (m, 12H,  $\text{CH}_3$ ,  $\text{C}(\text{CH}_3)_3$ ).

$^{13}\text{C}\{^1\text{H}\}$  NMR ( $\text{CD}_2\text{Cl}_2$ , 150MHz, ppm):  $\delta$  175.70, 169.10, 164.24, 162.60, 162.58, 156.80, 156.16, 147.94, 146.94, 138.45, 138.04, 133.47, 133.11, 133.09, 133.00, 132.98, 130.49, 130.43, 130.40, 130.35, 129.44, 125.73, 125.55, 125.12, 124.90, 120.27, 116.88, 116.03, 115.88, 113.20, 112.52, 112.09, 111.54, 107.73, 107.24, 101.34, 95.04, 67.88, 54.55, 48.48, 48.14, 42.85, 39.56, 36.44, 36.03, 32.73, 32.69, 32.36, 32.13, 31.50, 31.20, 30.85, 30.72, 28.04, 27.99, 27.19, 27.10, 19.69, 19.62, 13.87, 13.61.

HR-MS calcd for  $\text{C}_{53}\text{H}_{53}\text{ClF}_2\text{N}_4\text{O}_2$   $[\text{M}+\text{H}]^+$   $m/z$  851.38979, found  $m/z$  851.38934.

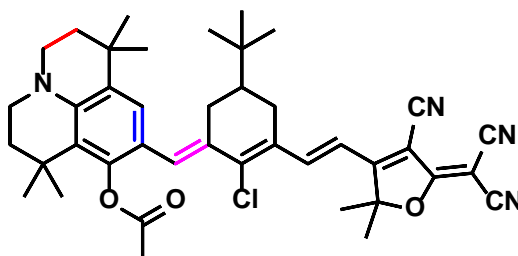

2-((*E*)-(5-(*tert*-butyl)-2-chloro-3-((*E*)-2-(4-cyano-5-(dicyanomethylene)-2,2-dimethyl-2,5-dihydrofuran-3-yl)vinyl)cyclohex-2-en-1-ylidene)methyl)-1,1,7,7-tetramethyl-2,3,6,7-tetrahydro-1*H*,5*H*-pyrido[3,2,1-*ij*]quinolin-8-yl acetate (**TE-I-8**).

A peak at 679.38776 suggests the formation of **TE-I-8**.

HR-MS calcd for  $C_{41}H_{47}ClN_4O_3 M^+$  m/z 679.34095, found m/z 679.38776.

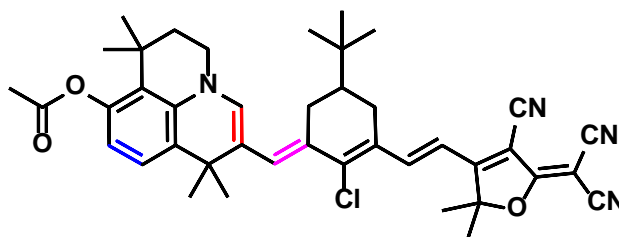

2-((*E*)-(5-(*tert*-butyl)-2-chloro-3-((*E*)-2-(4-cyano-5-(dicyanomethylene)-2,2-dimethyl-2,5-dihydrofuran-3-yl)vinyl)cyclohex-2-en-1-ylidene)methyl)-1,1,7,7-tetramethyl-6,7-dihydro-1*H*,5*H*-pyrido[3,2-*ij*]quinolin-8-yl acetate (**TE-II-8**).

15h, dark solid (19 mg, 11 %).

$^1H$  NMR ( $CD_2Cl_2$ , 400MHz, ppm):  $\delta$  8.19 (d,  $J = 15.8$  Hz, 1H, =CH), 7.26 (d,  $J = 6.0$  Hz, 1H, =CH), 7.17 (t,  $J = 8.5$  Hz, 1H,  $CH_{Ar}$ ), 6.57 (t,  $J = 8.5$  Hz, 1H,  $CH_{Ar}$ ), 6.49 (dd,  $J = 15.7, 3.7$  Hz, 1H, =CH), 6.35 (d,  $J = 24.8$  Hz, 1H, =CH), 3.60-3.45 (m, 2H,  $NCH_2$ ), 3.15 (d,  $J = 14.4$  Hz, 1H,  $CH_2$ ), 2.67 (d,  $J = 14.4$  Hz, 1H,  $CH_2$ ), 2.33-2.06 (m, 5H,  $CH_2$ ,  $COCH_3$ ), 1.87-1.80 (m, 2H,  $CH_2$ ), 1.74 (d,  $J = 14.4$  Hz, 6H,  $C(CH_3)_2$ ), 1.50-1.38 (m, 6H,  $C(CH_3)_2$ ), 1.38-1.27 (m, 7H, CH,  $C(CH_3)_2$ ), 0.99 (s, 9H,  $C(CH_3)_3$ ).

$^{13}C\{^1H\}$  NMR ( $CD_2Cl_2$ , 150MHz, ppm):  $\delta$  176.05, 174.09, 169.53, 169.41, 148.13, 147.84, 145.82, 145.03, 135.89, 135.08, 134.95, 134.90, 133.78, 131.43, 131.29, 129.99, 129.85, 129.69, 129.05, 125.19, 124.66, 123.23, 122.53, 117.87, 117.48, 115.81, 114.92, 113.27, 113.20, 112.46, 111.86, 111.06, 97.39, 96.70, 55.28, 47.53, 47.01, 43.21, 43.14, 38.87, 36.72, 36.32, 35.78, 32.46, 32.28, 32.22, 32.08, 31.58, 31.42, 30.90, 30.77, 30.70, 30.64, 29.85, 28.72, 28.58, 27.65, 27.10, 26.93, 26.66, 26.57, 22.64, 21.55, 21.49, 13.87.

HR-MS calcd for  $C_{41}H_{45}ClN_4O_3 [M+H]^+$  m/z 677.32530, found m/z 677.32489.

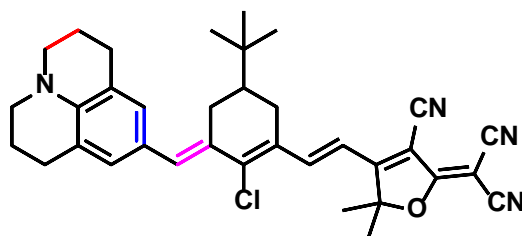

2-(4-((*E*)-2-((*E*)-5-(*tert*-butyl)-2-chloro-3-((2,3,6,7-tetrahydro-1*H*,5*H*-pyrido[3,2-*ij*]quinolin-9-yl)methylene)cyclohex-1-en-1-yl)vinyl)-3-cyano-5,5-dimethylfuran-2(5*H*)-ylidene)malononitrile (**TE-I-9**).

15h, dark solid (77 mg, 54 %).

$^1H$  NMR ( $CDCl_3$ , 300MHz, ppm):  $\delta$  8.10 (d,  $J = 15.9$  Hz, 1H, =CH), 7.36 (s, 1H, =CH), 6.97 (s, 2H,  $CH_{Ar}$ ), 6.54 (d,  $J = 15.9$  Hz, 1H, =CH), 3.27 (dd,  $J = 11.4, 5.7$  Hz, 5H,  $CH_2$ ,  $NCH_2$ ), 2.81-2.59 (m, 5H,  $CH_2$ ), 2.20 (dd,  $J = 27.2, 12.0$  Hz, 2H,  $CH_2$ ), 2.01 (dd,  $J = 11.6, 6.0$  Hz, 4H,  $CH_2$ ), 1.80 (s, 6H,  $C(CH_3)_2$ ), 1.55-1.43 (m, 1H, CH), 1.00 (s, 9H,  $C(CH_3)_3$ ).

$^{13}C\{^1H\}$  NMR ( $CD_2Cl_2$ , 150MHz, ppm):  $\delta$  176.04, 174.14, 146.12, 145.13, 144.09, 137.78, 130.58, 130.52, 130.27, 123.35, 121.09, 113.48, 112.44, 111.83, 111.01, 97.45, 96.88, 55.38, 49.96, 43.02, 32.25, 30.10, 27.79, 27.56, 27.11, 26.64, 26.58, 21.62.

HR-MS calcd for  $C_{35}H_{37}ClN_4O [M+H]^+$  m/z 565.27287, found m/z 565.27295.

HRMS/HPLC experiment to identify the formation of INT-b

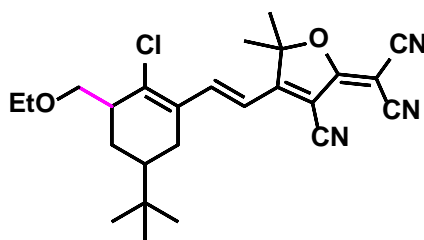

INT-b

HR-MS analysis of reaction with **JD1** and **TCF-A1** in  $\text{Ac}_2\text{O}$  at 80 °C for 2 days:

Products were separated on a J&K Scientific HPLC C18-H column (10  $\mu\text{m}$ , 21.2 x 250 mm) with a linear gradient using a combination of solvent A (acetonitrile, 1% FA) and solvent B (water, 1% FA) at a flow rate of 6 mL/minute. Gradient protocol in minutes: 0 (5% A); 5 (10% A); 55 (95% A), 55-60 (95% A). High-resolution spectra for the reaction product **INT-b** at elution time of 43 -46 min. A peak at 439.29248 suggest the formation of **INT-b**.

HR-MS calcd for  $\text{C}_{25}\text{H}_{30}\text{ClN}_3\text{O}_2 \text{M}^+$   $m/z$  439.20265, found  $m/z$  439.29248.

Final - Shots 400 - 20200709; Label K5

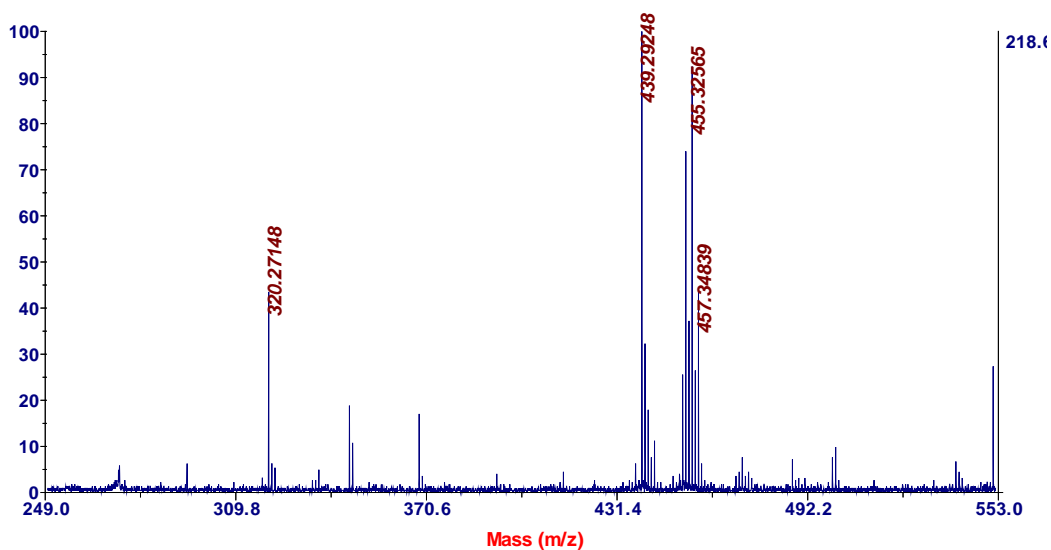

Figure S5. HRMS spectrum of compound **TCF-A1(+2H)**.

## 4. Spectra

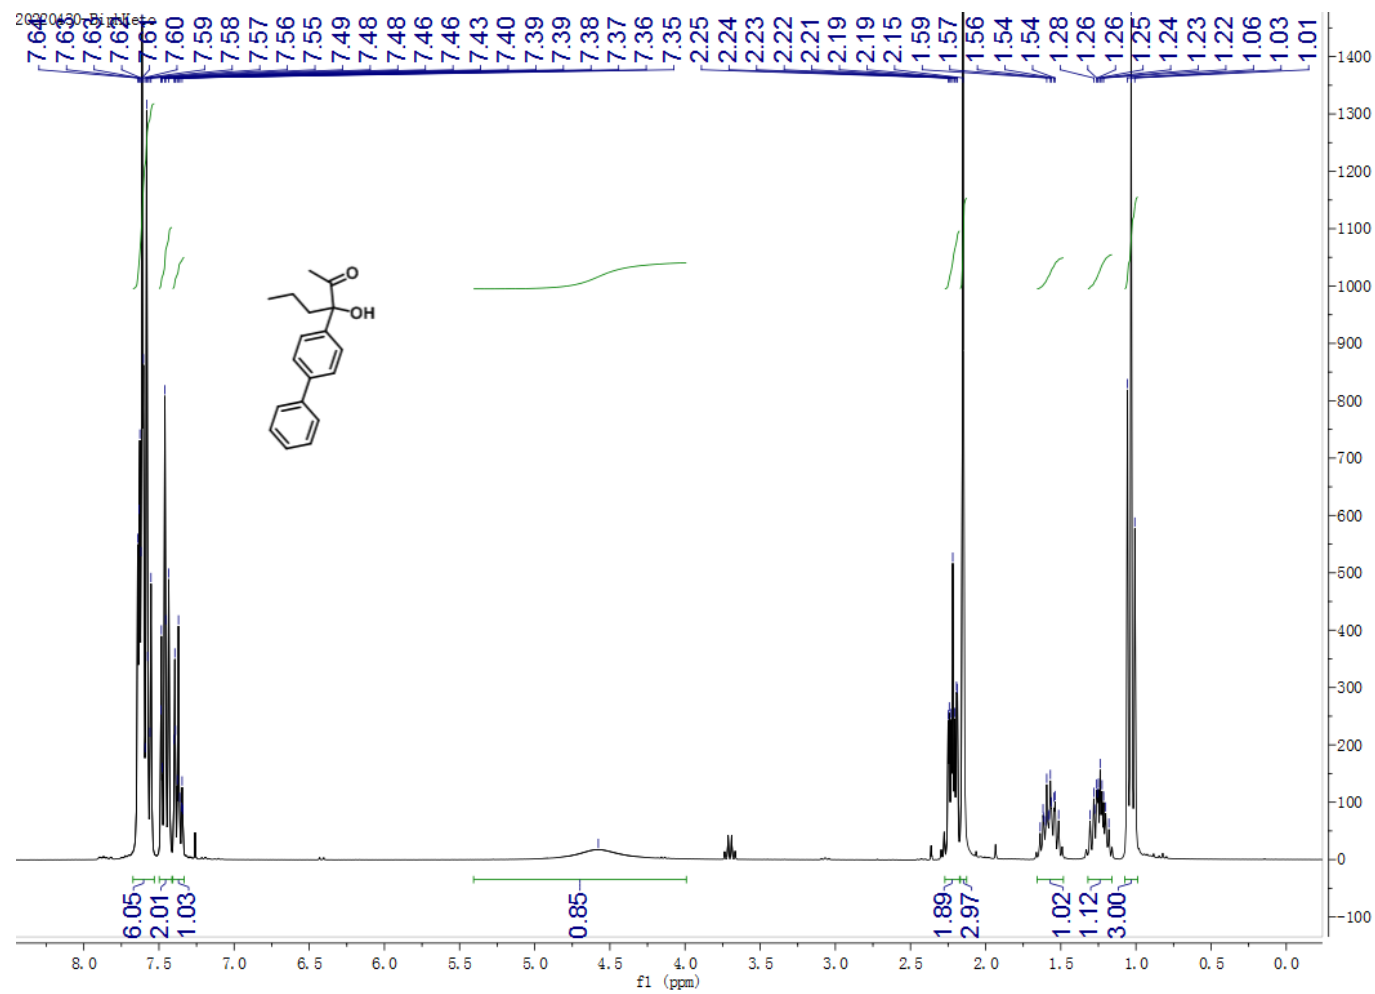

Figure S6. <sup>1</sup>H NMR spectrum of compound 1.

20220630-BiphKeto-C-300

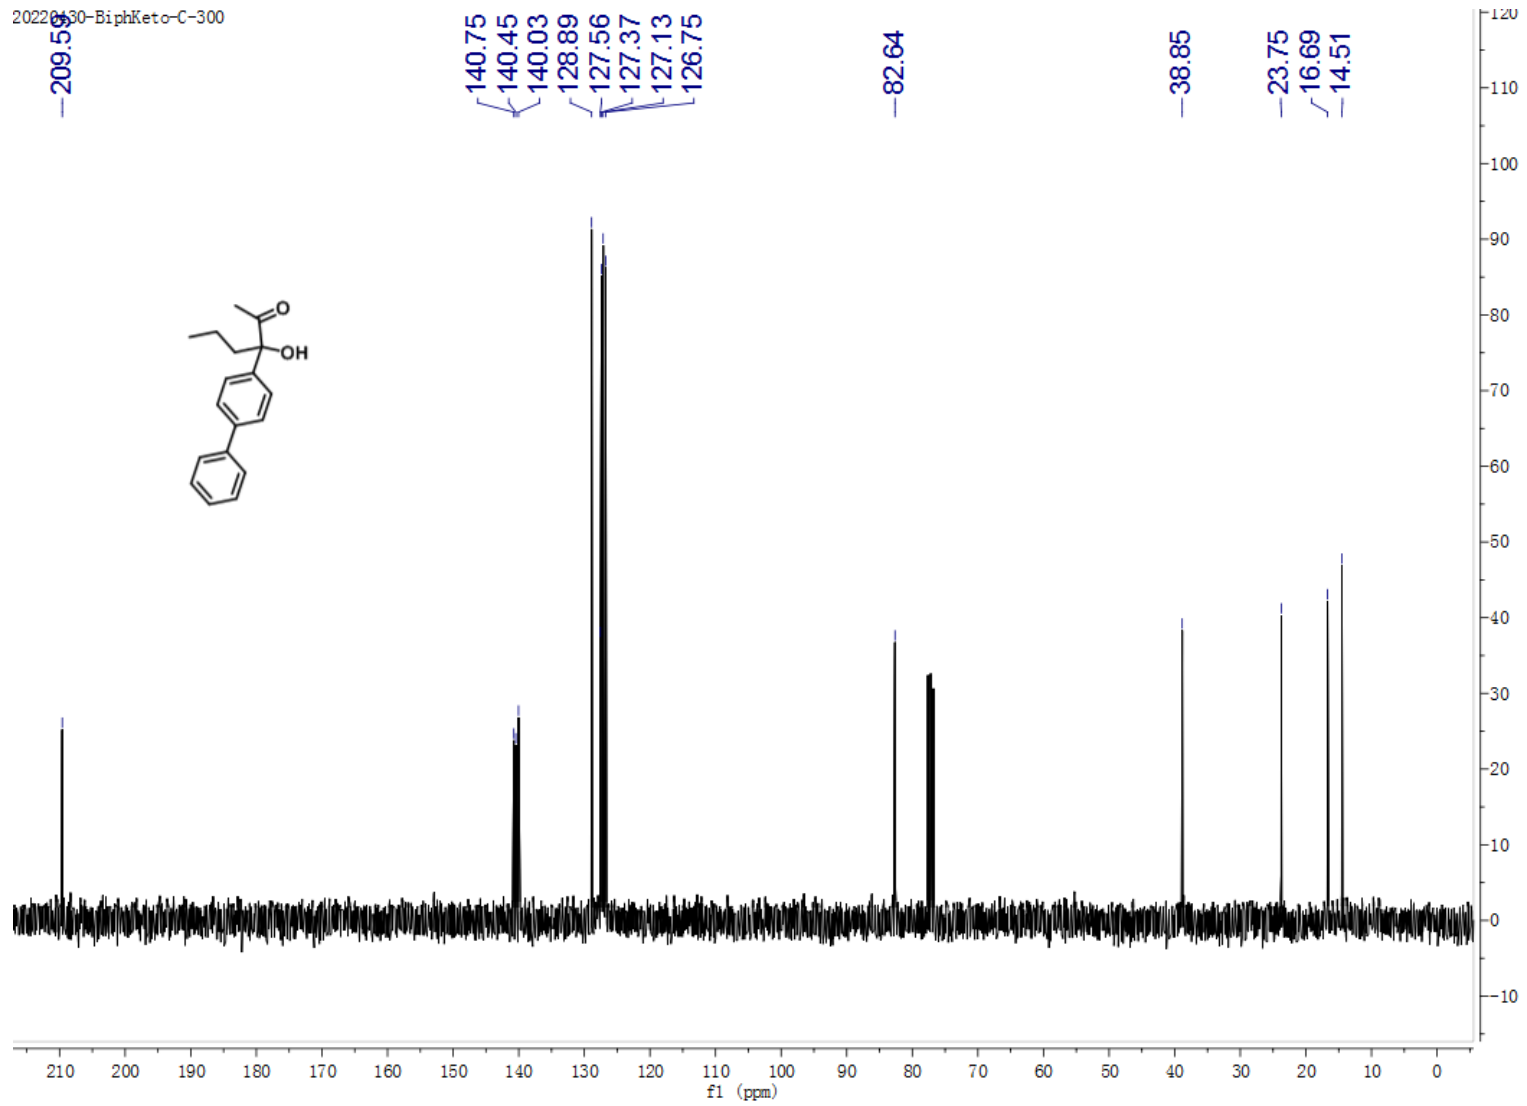

Figure S7. <sup>13</sup>C NMR spectrum of compound 1.

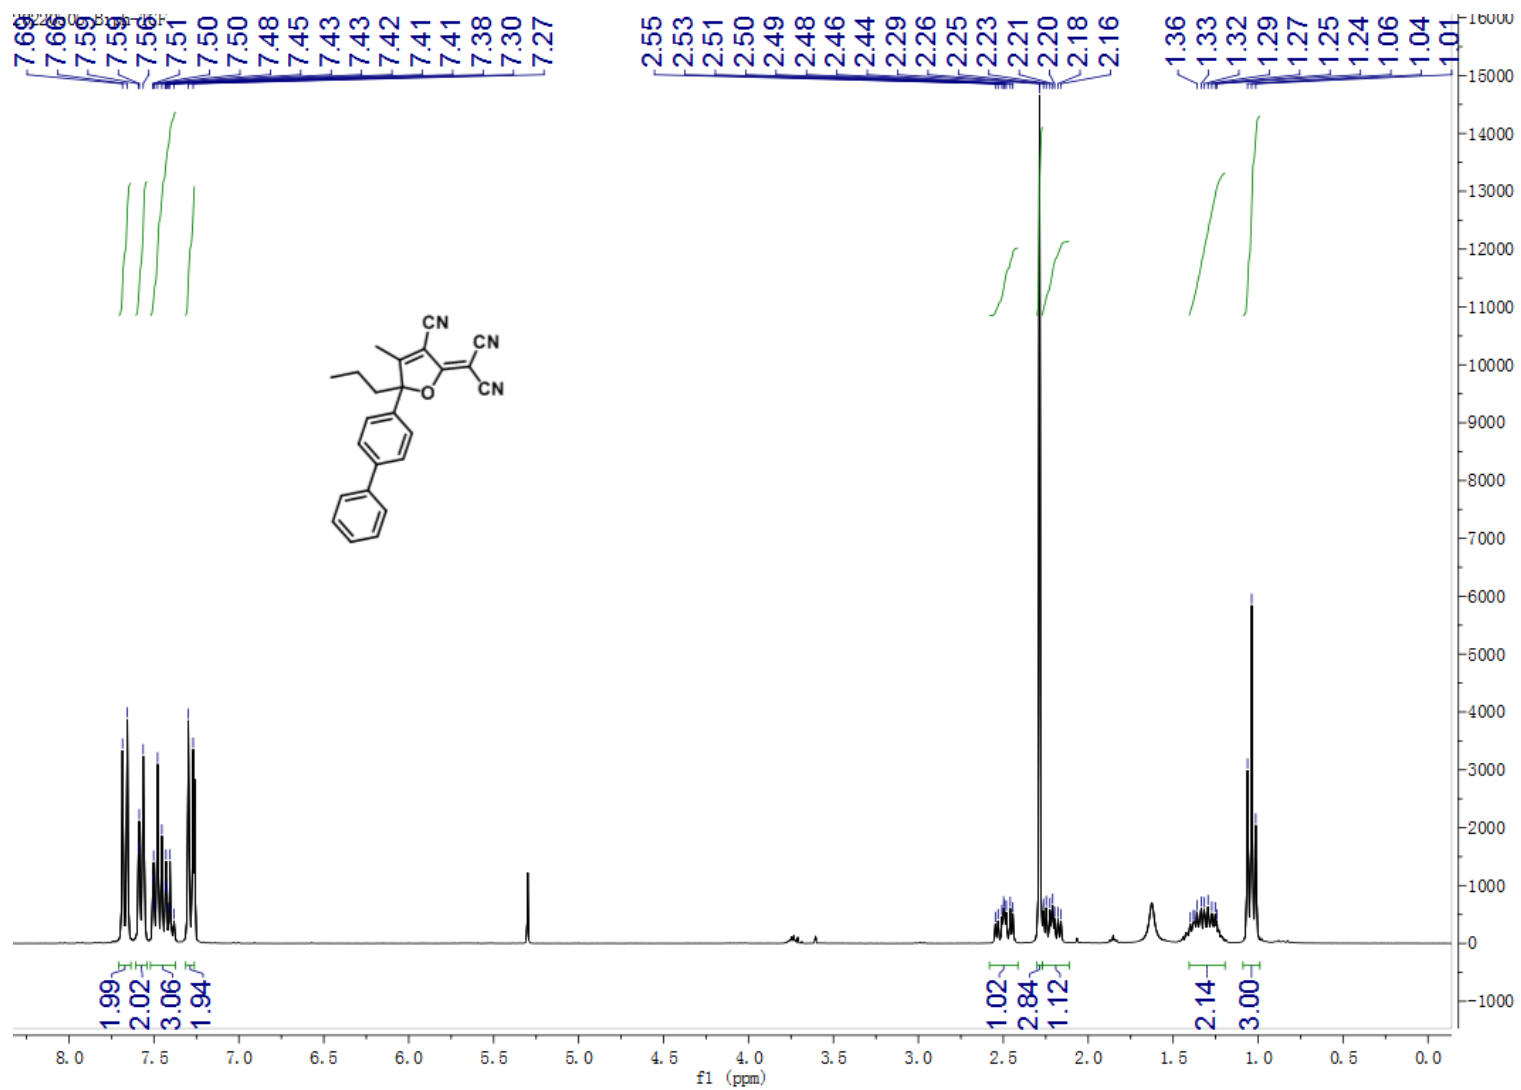

Figure S8. <sup>1</sup>H NMR spectrum of compound TCF3.

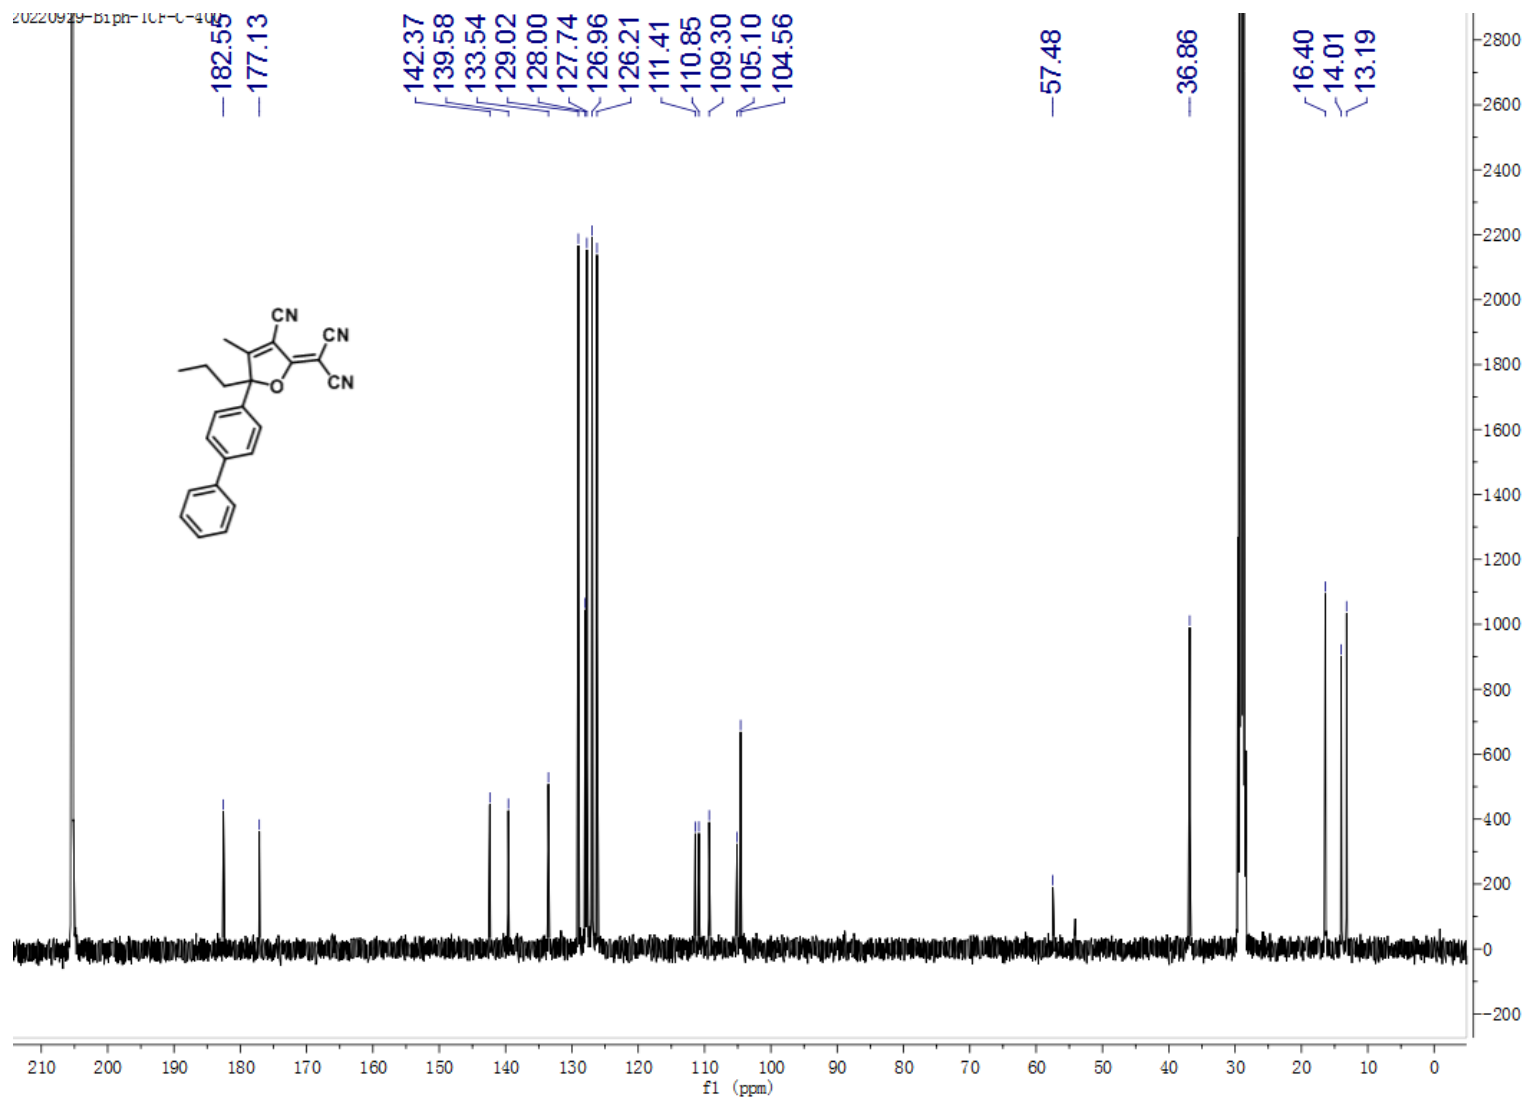

Figure S9.  $^{13}\text{C}$  NMR spectrum of compound TCF3.

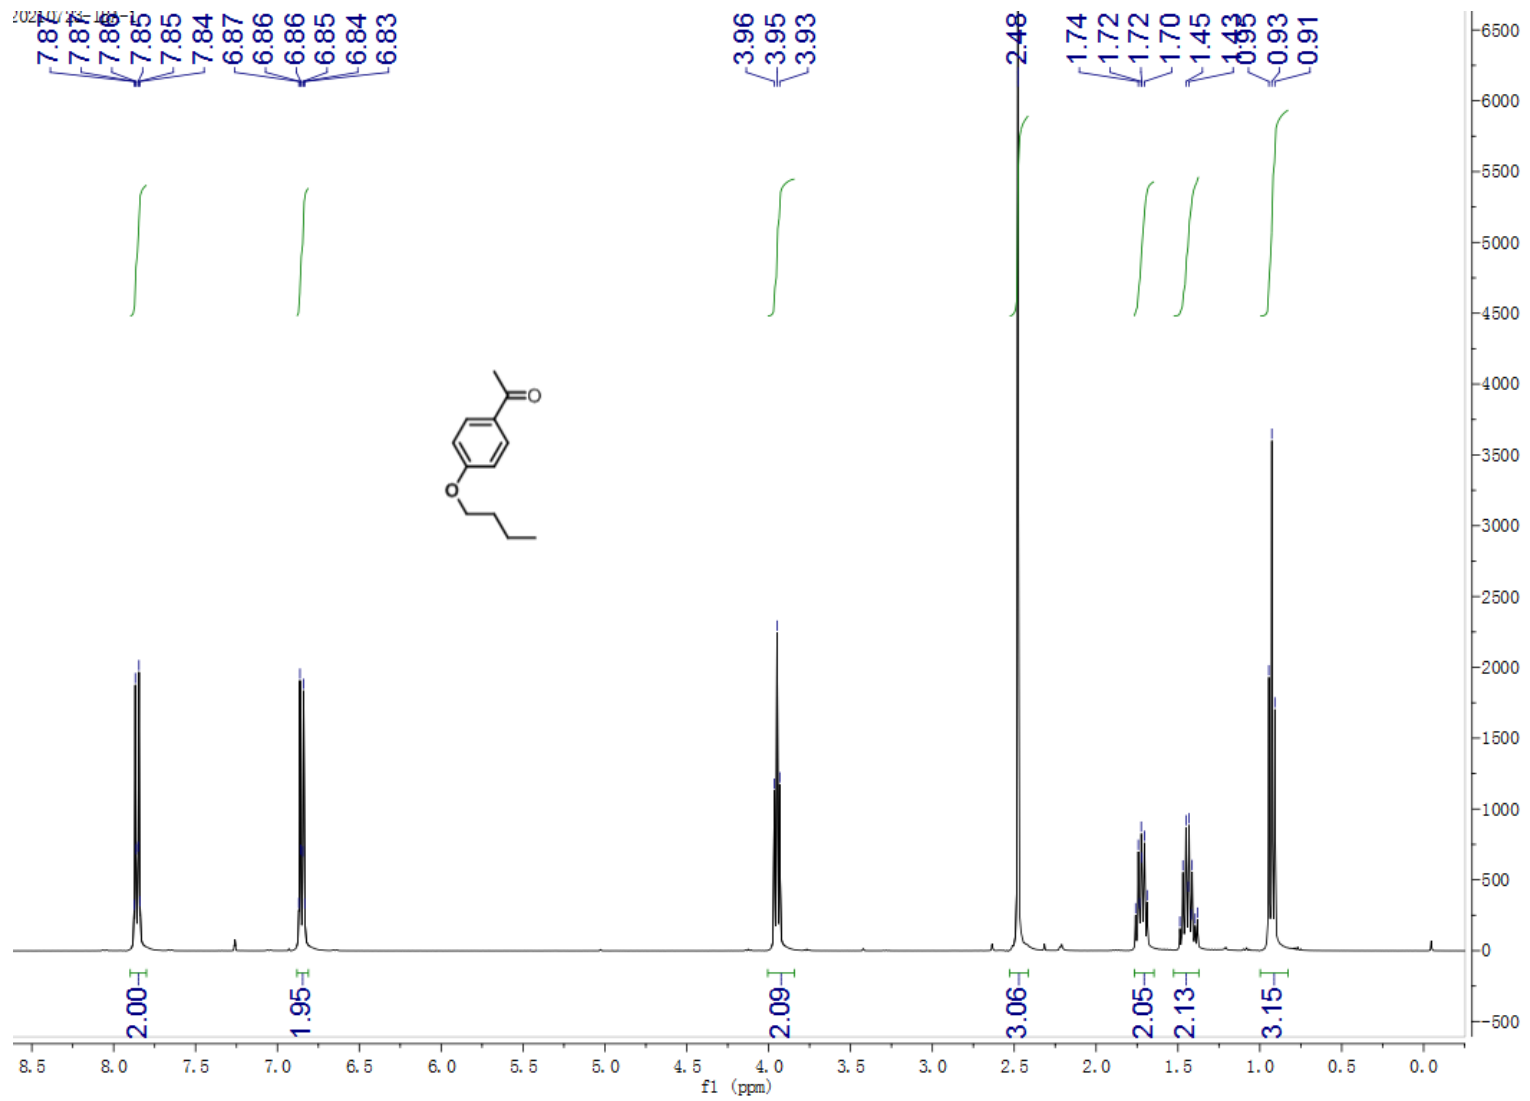

Figure S10. <sup>1</sup>H NMR spectrum of compound 2.



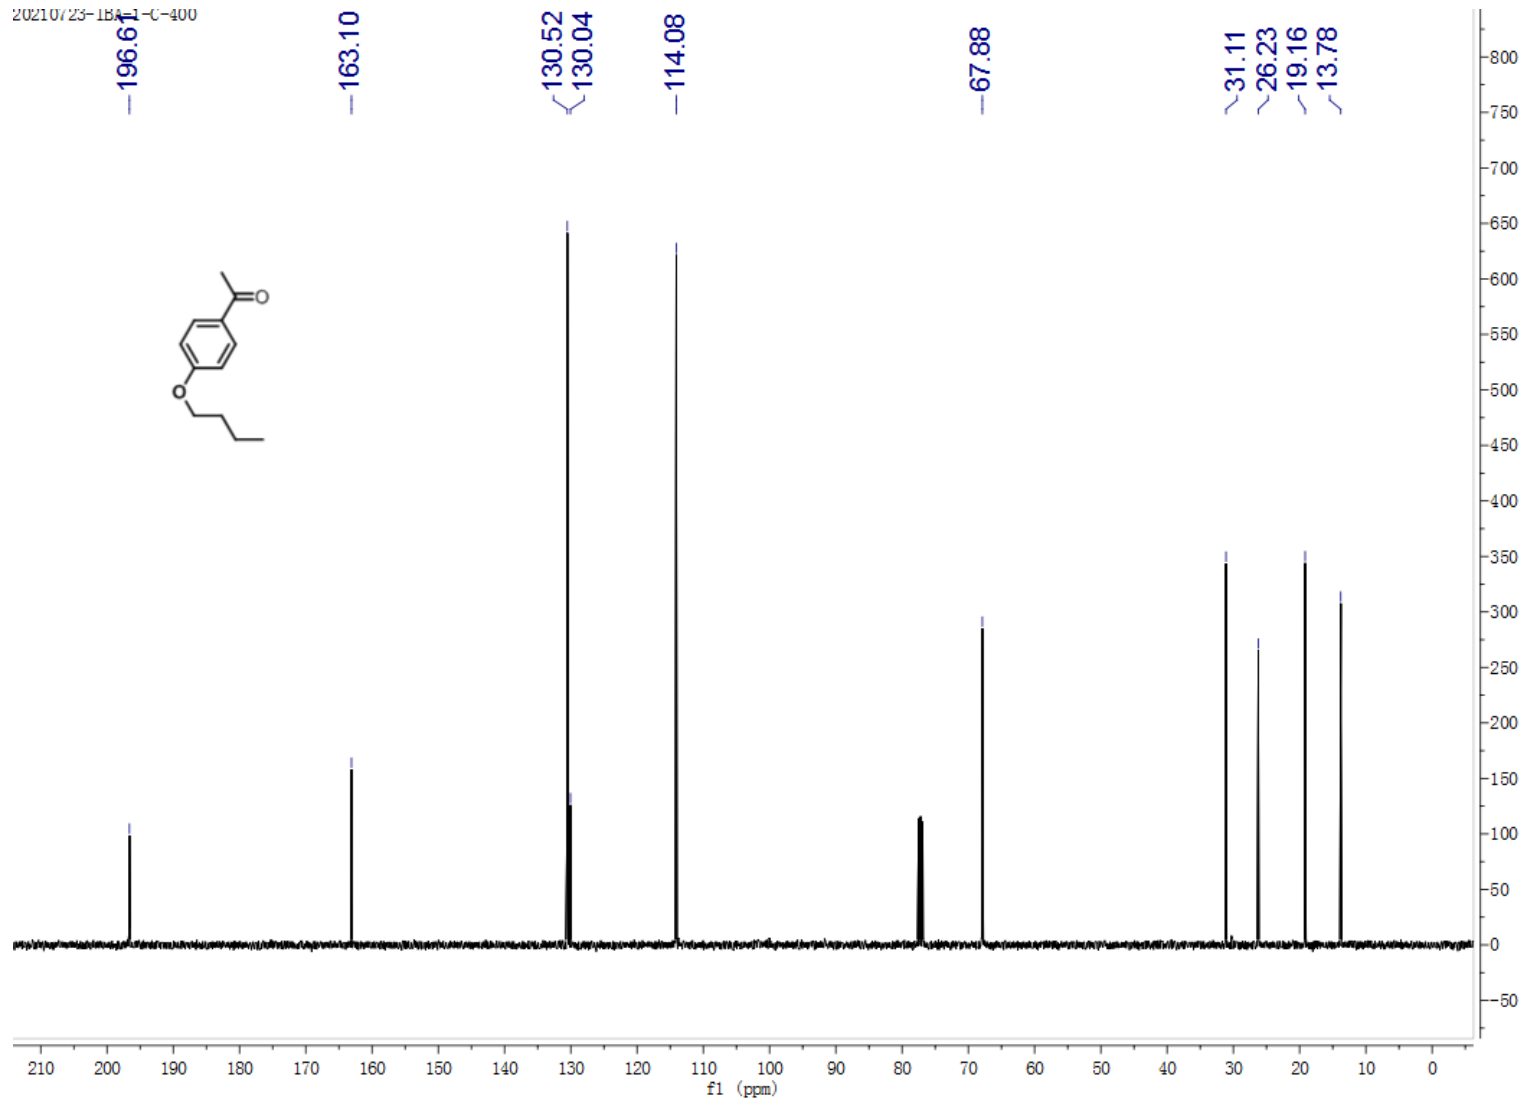

Figure S11.  $^{13}\text{C}$  NMR spectrum of compound 2.

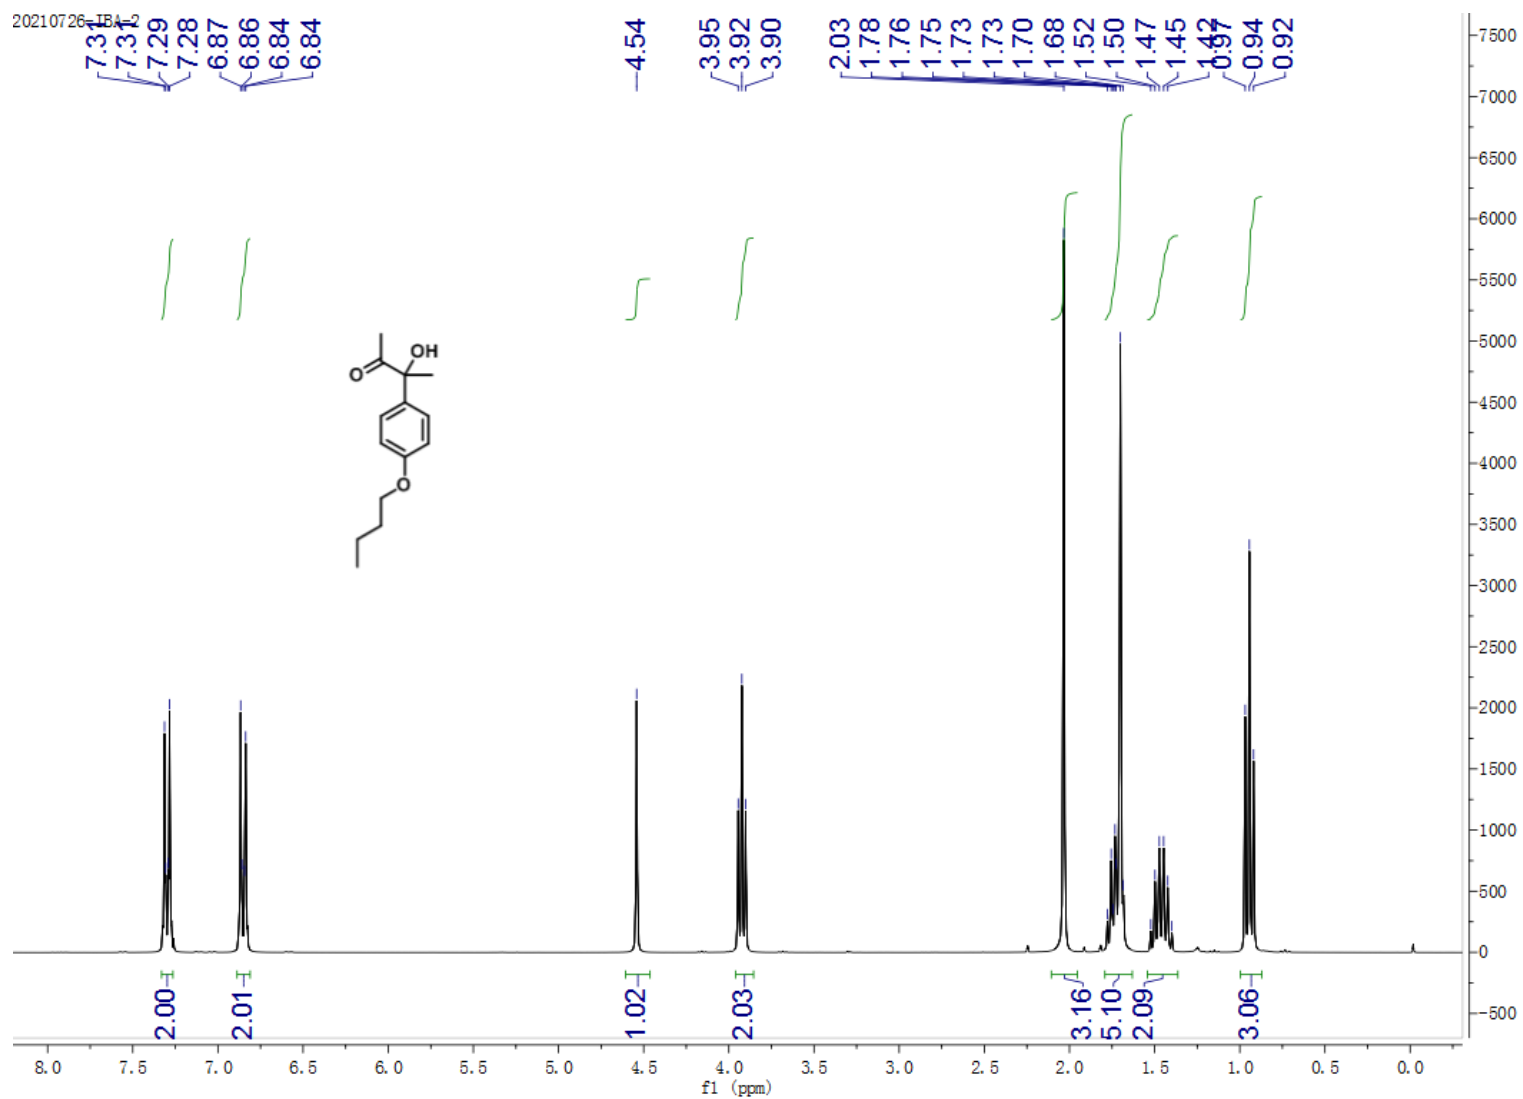

Figure S12.  $^1\text{H}$  NMR spectrum of compound 3.

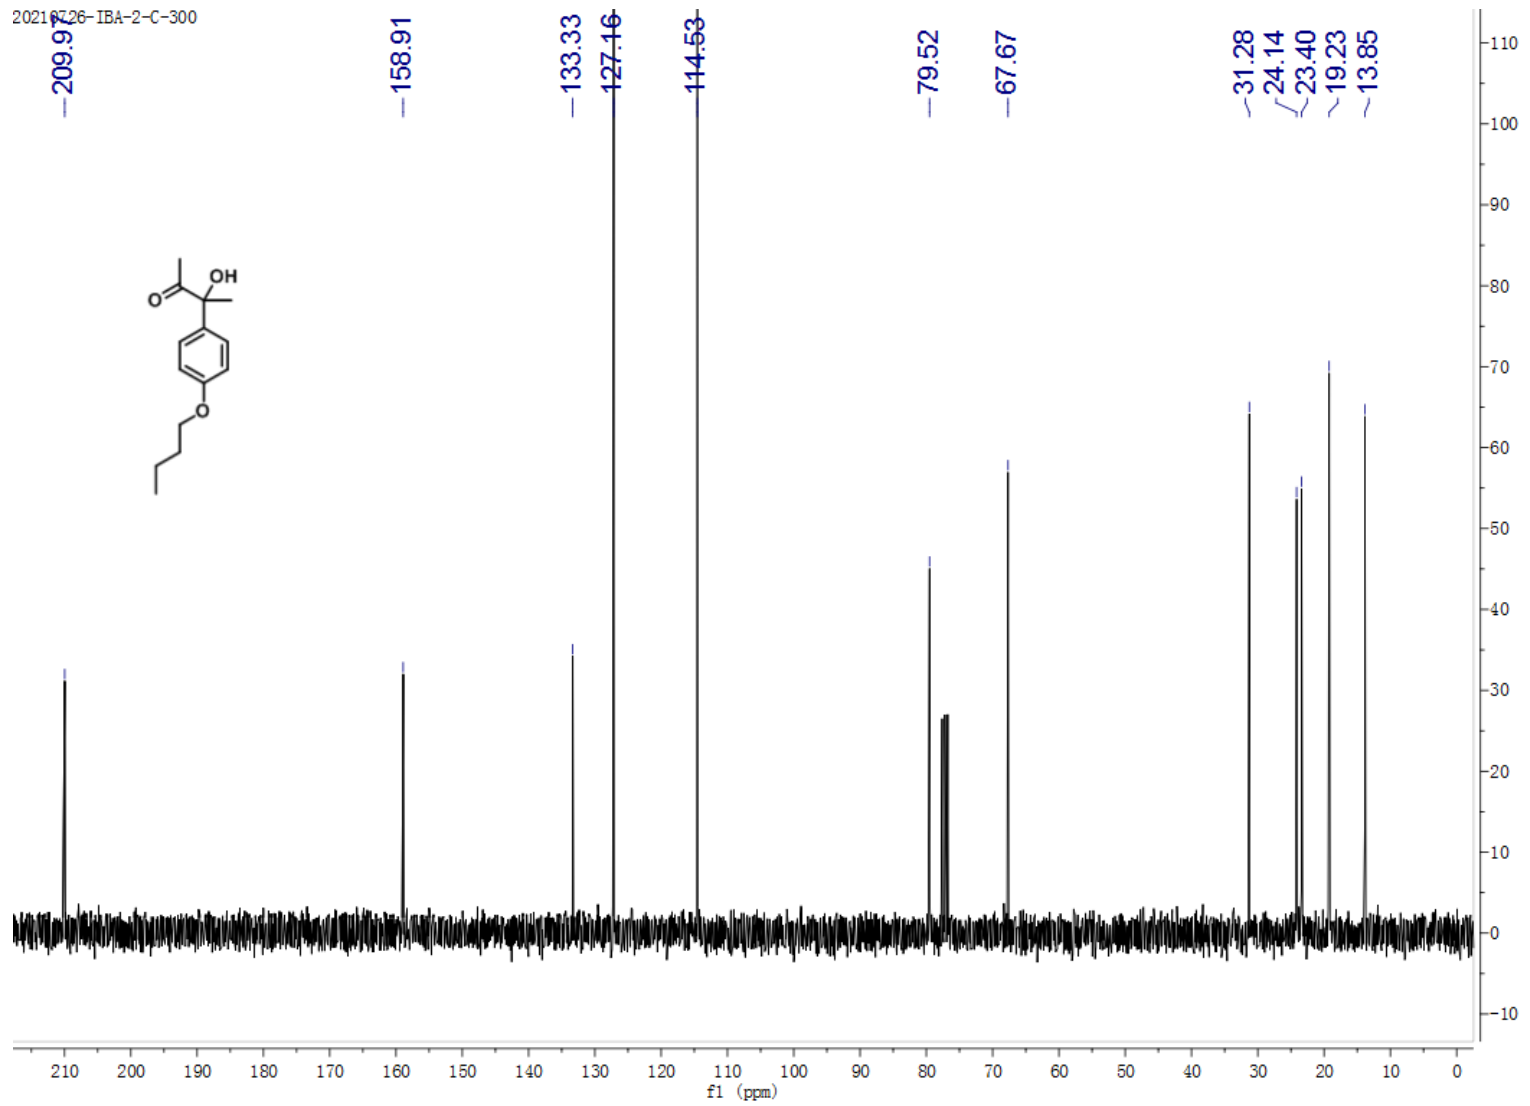

**Figure S13.**  $^{13}\text{C}$  NMR spectrum of compound **3**.

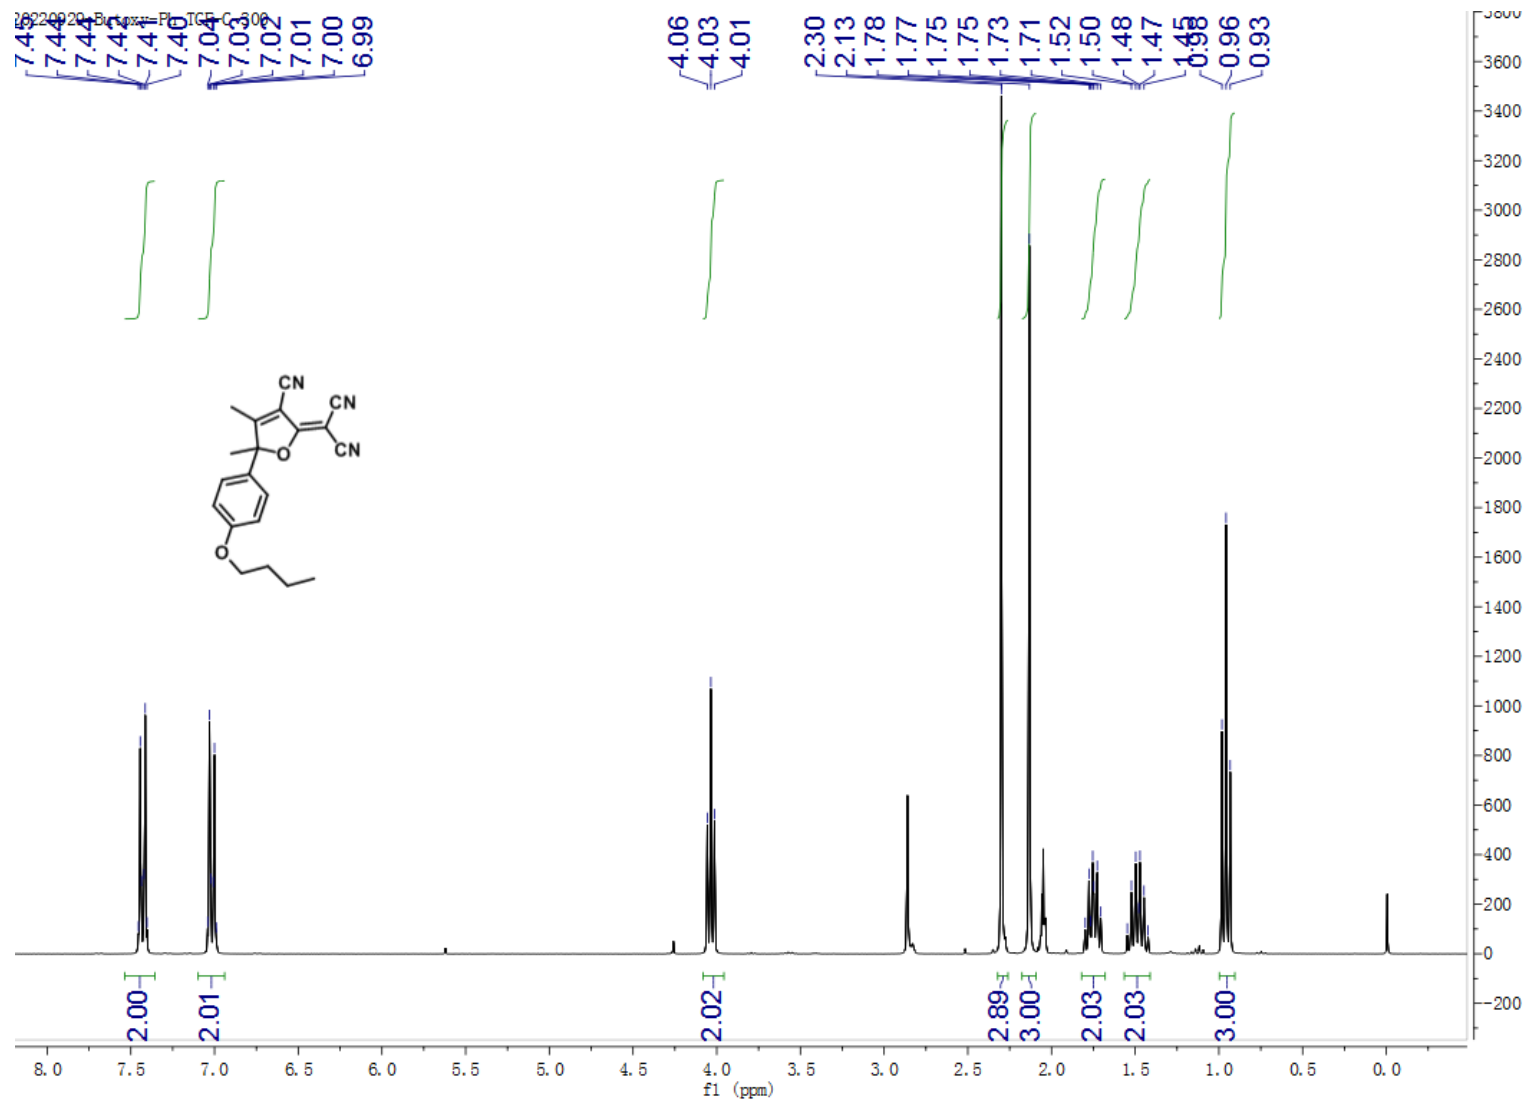

Figure S14. <sup>1</sup>H NMR spectrum of compound TCF2.

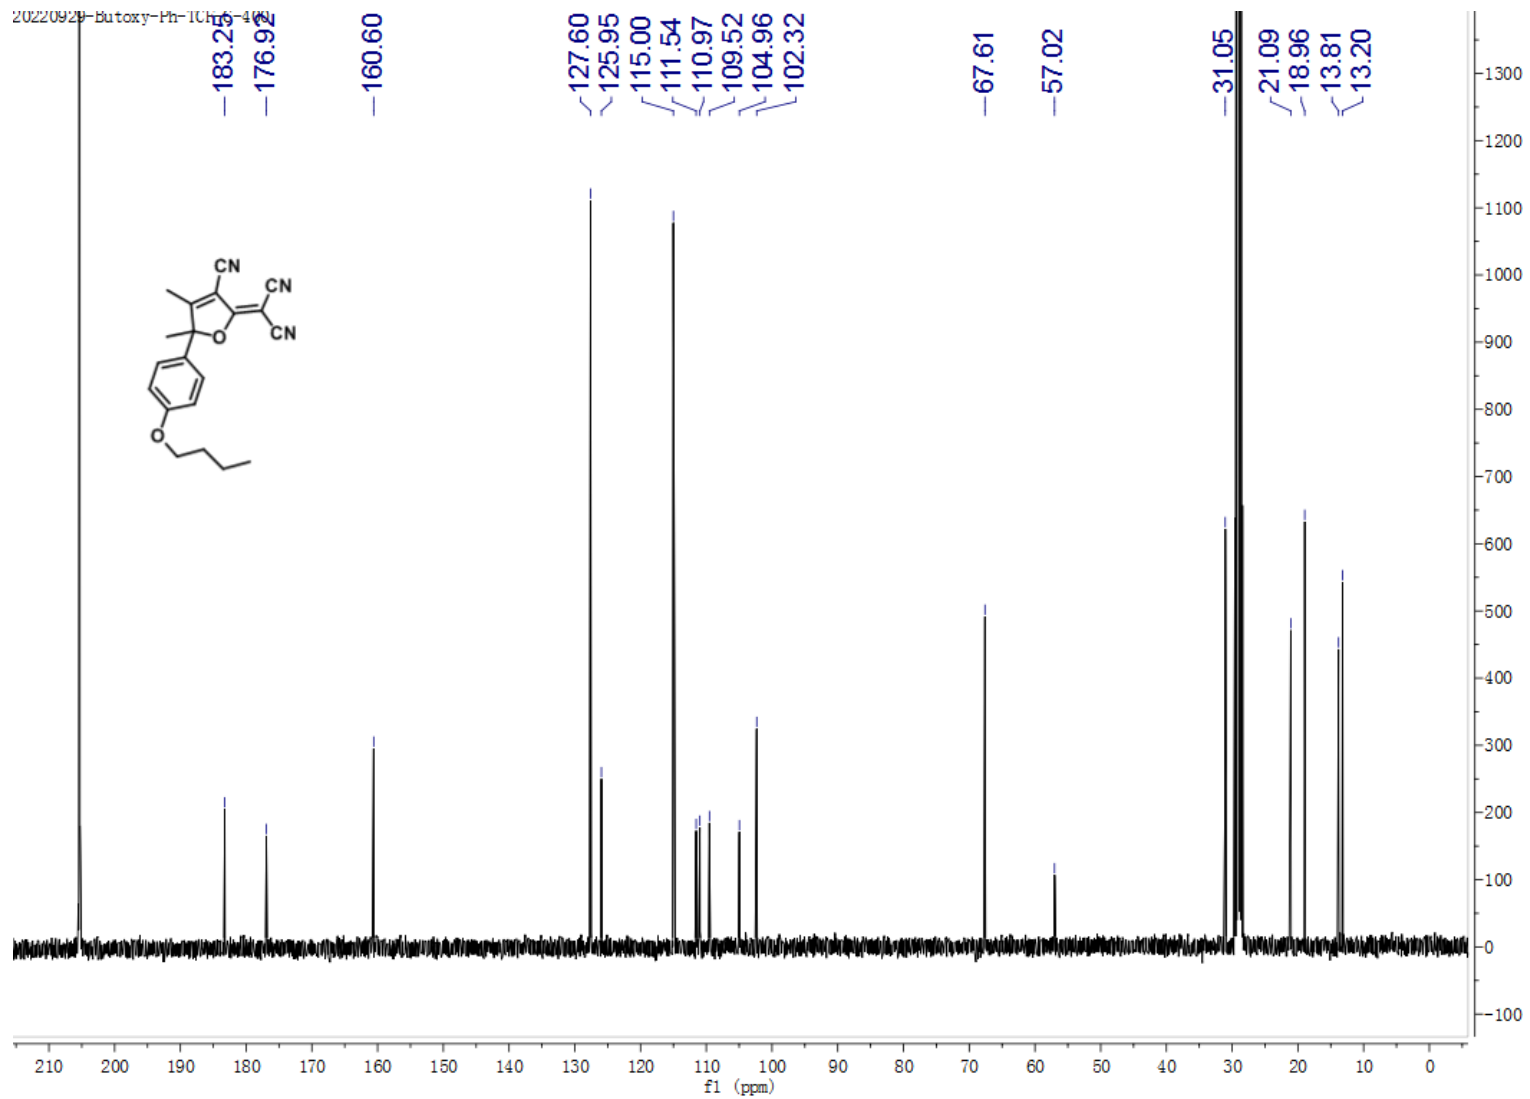

Figure S15.  $^{13}\text{C}$  NMR spectrum of compound TCF2.

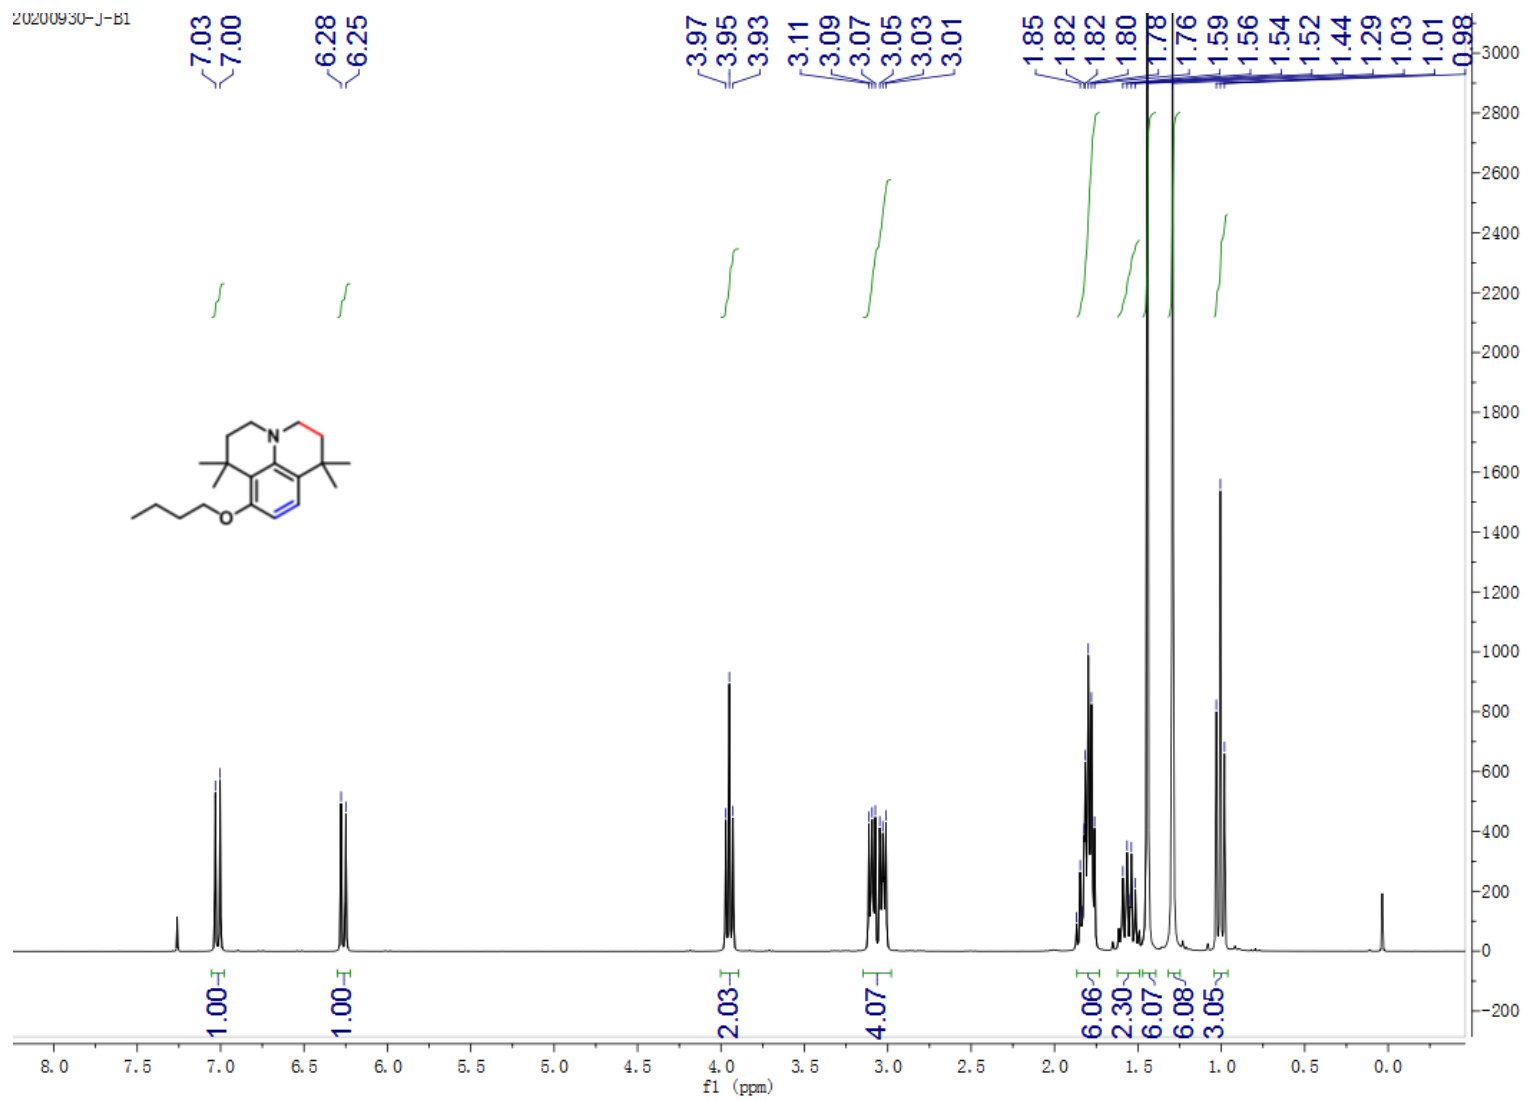

Figure S16.  $^1\text{H}$  NMR spectrum of compound JD1.

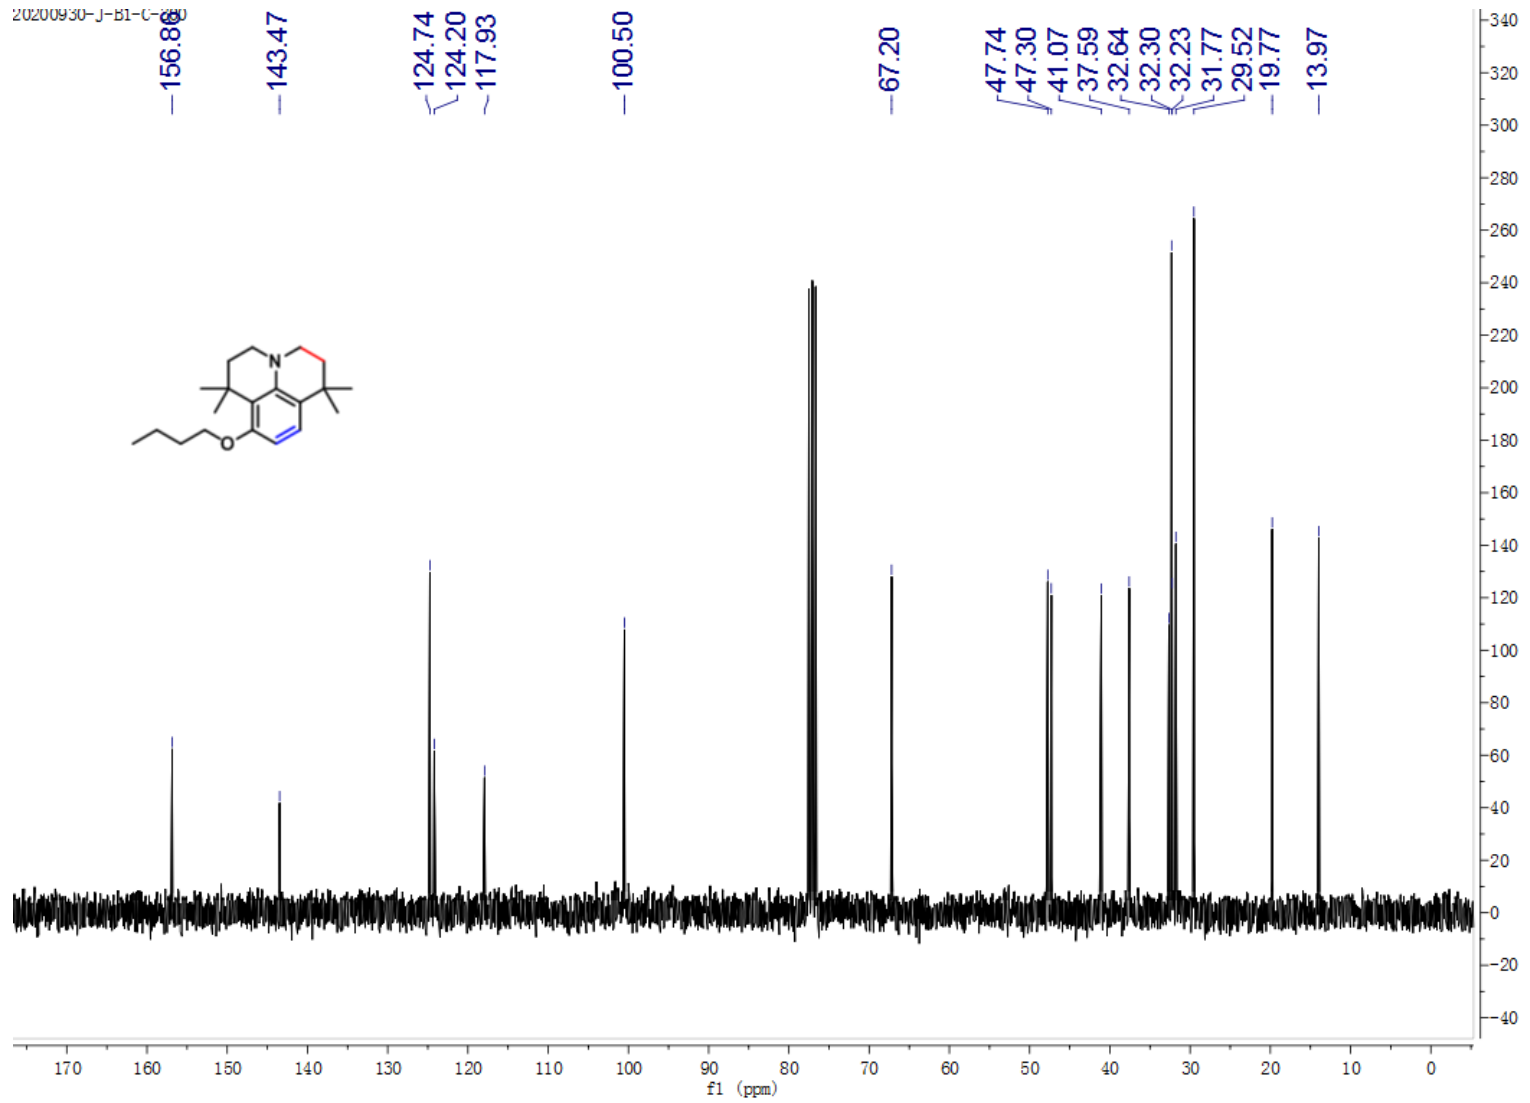

Figure S17.  $^{13}\text{C}$  NMR spectrum of compound JD1.

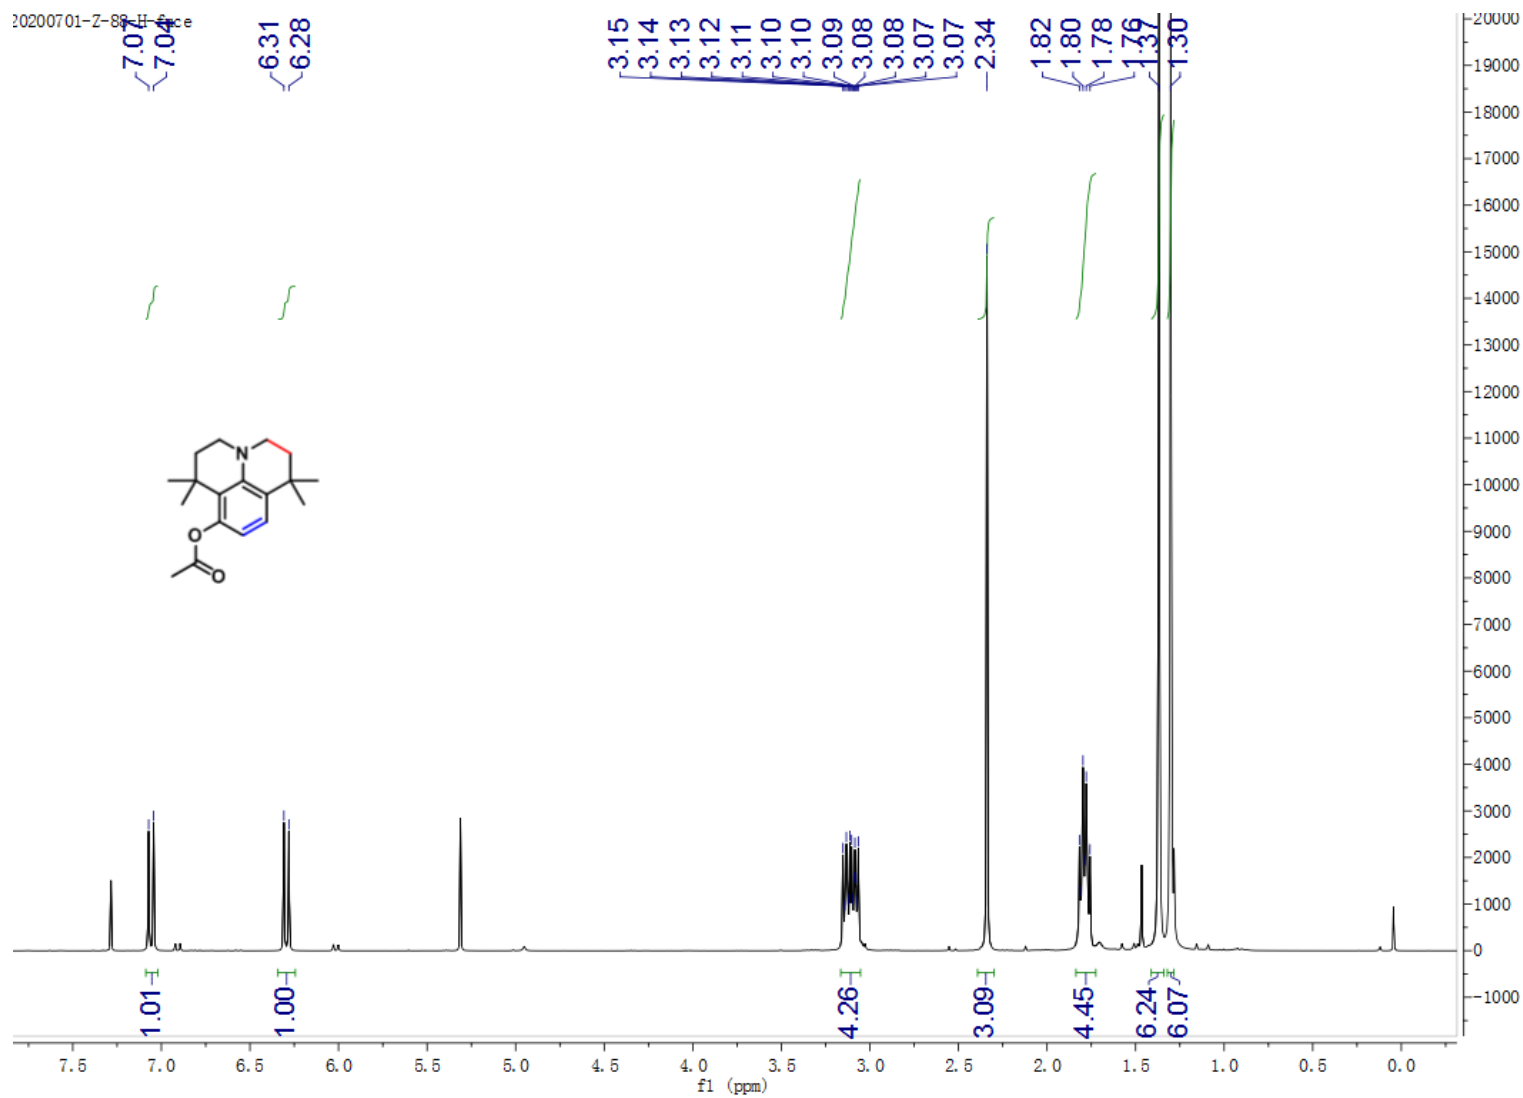

Figure S18.  $^1\text{H}$  NMR spectrum of compound JD2.



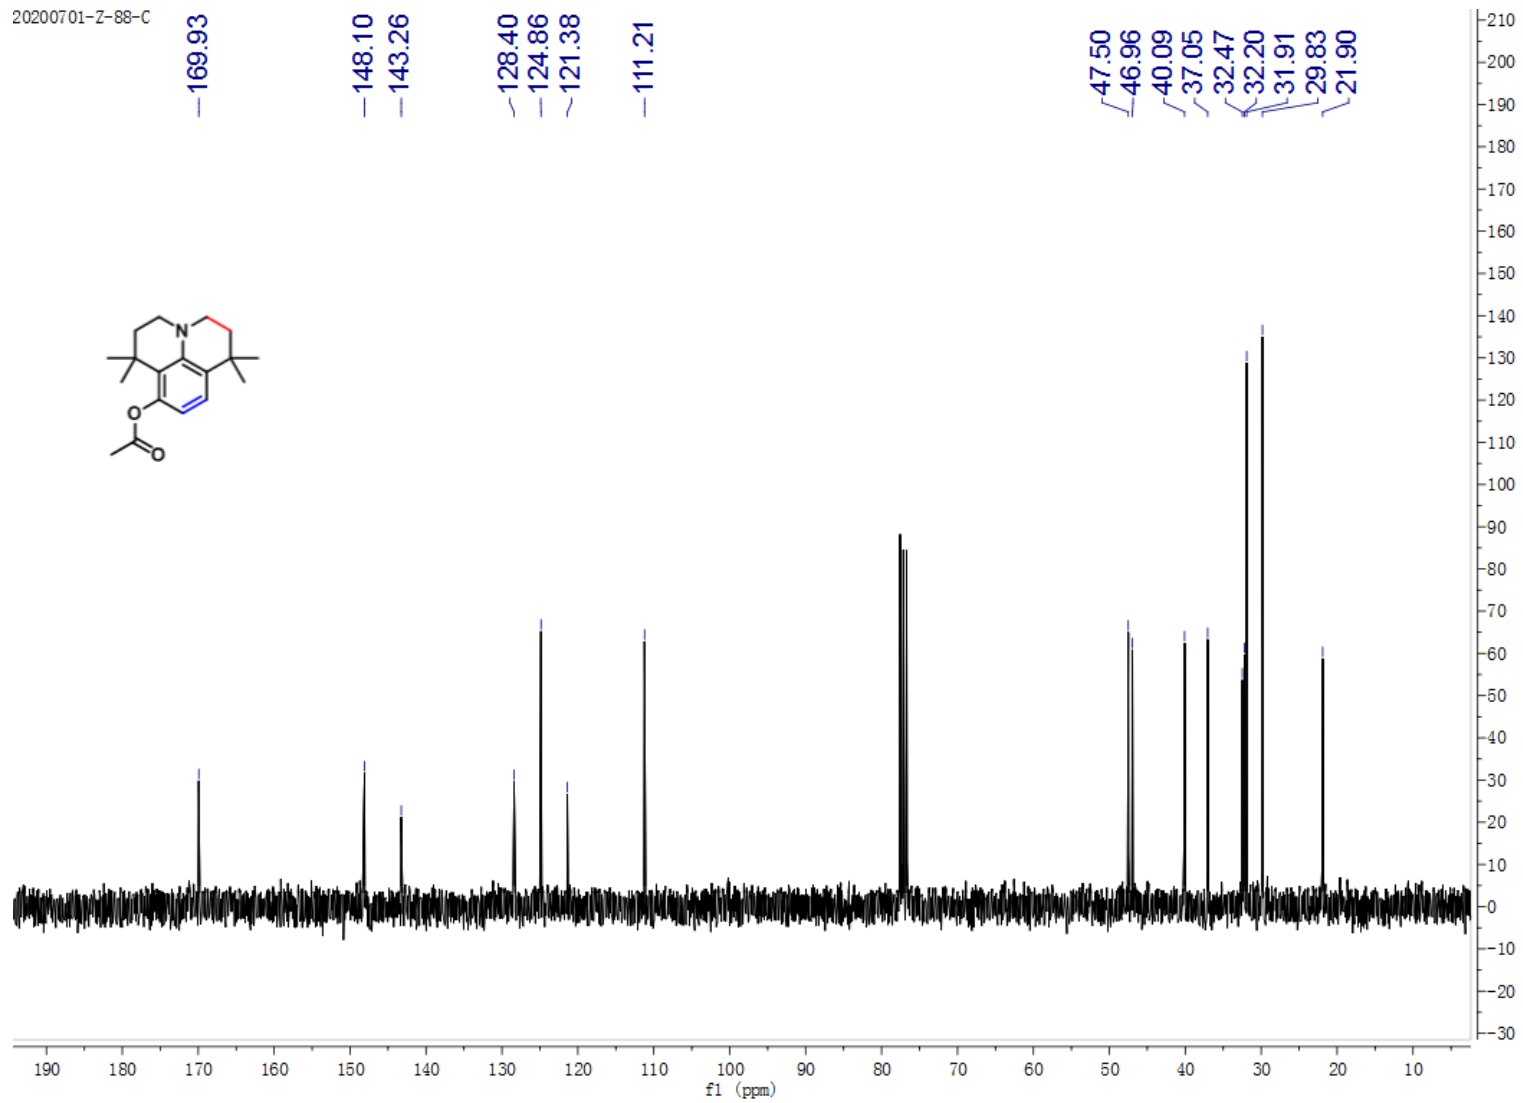

Figure S19.  $^{13}\text{C}$  NMR spectrum of compound JD2.

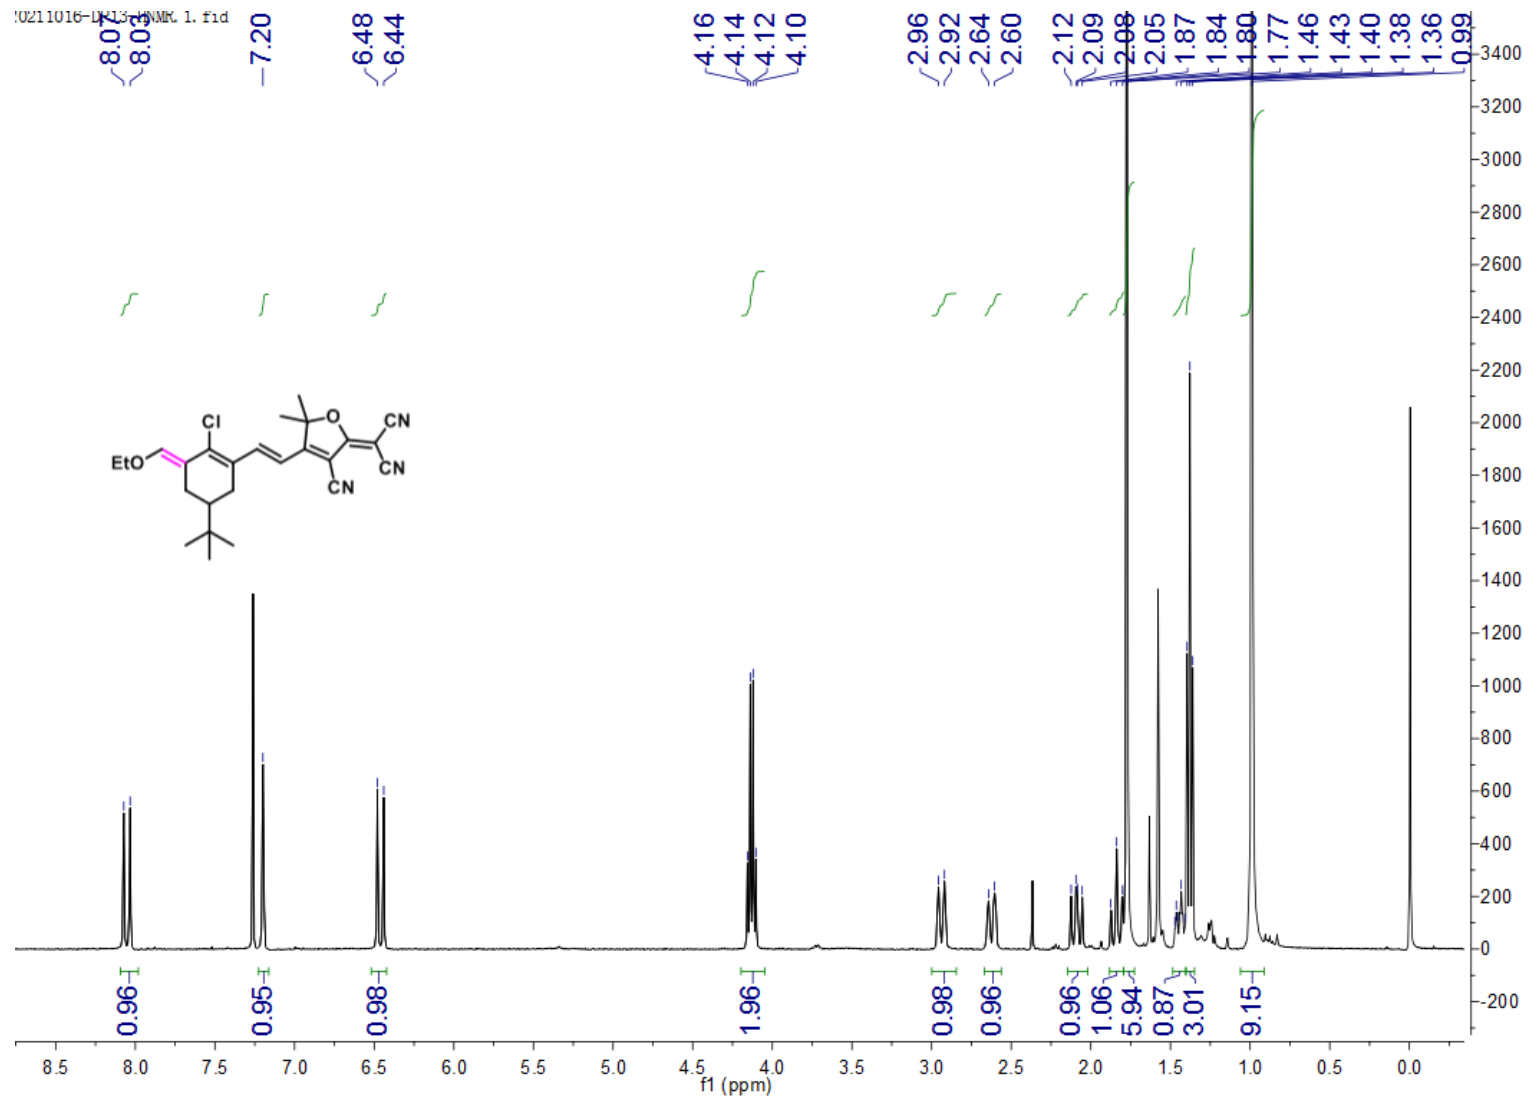

Figure S20. <sup>1</sup>H NMR spectrum of compound TCF-A1.

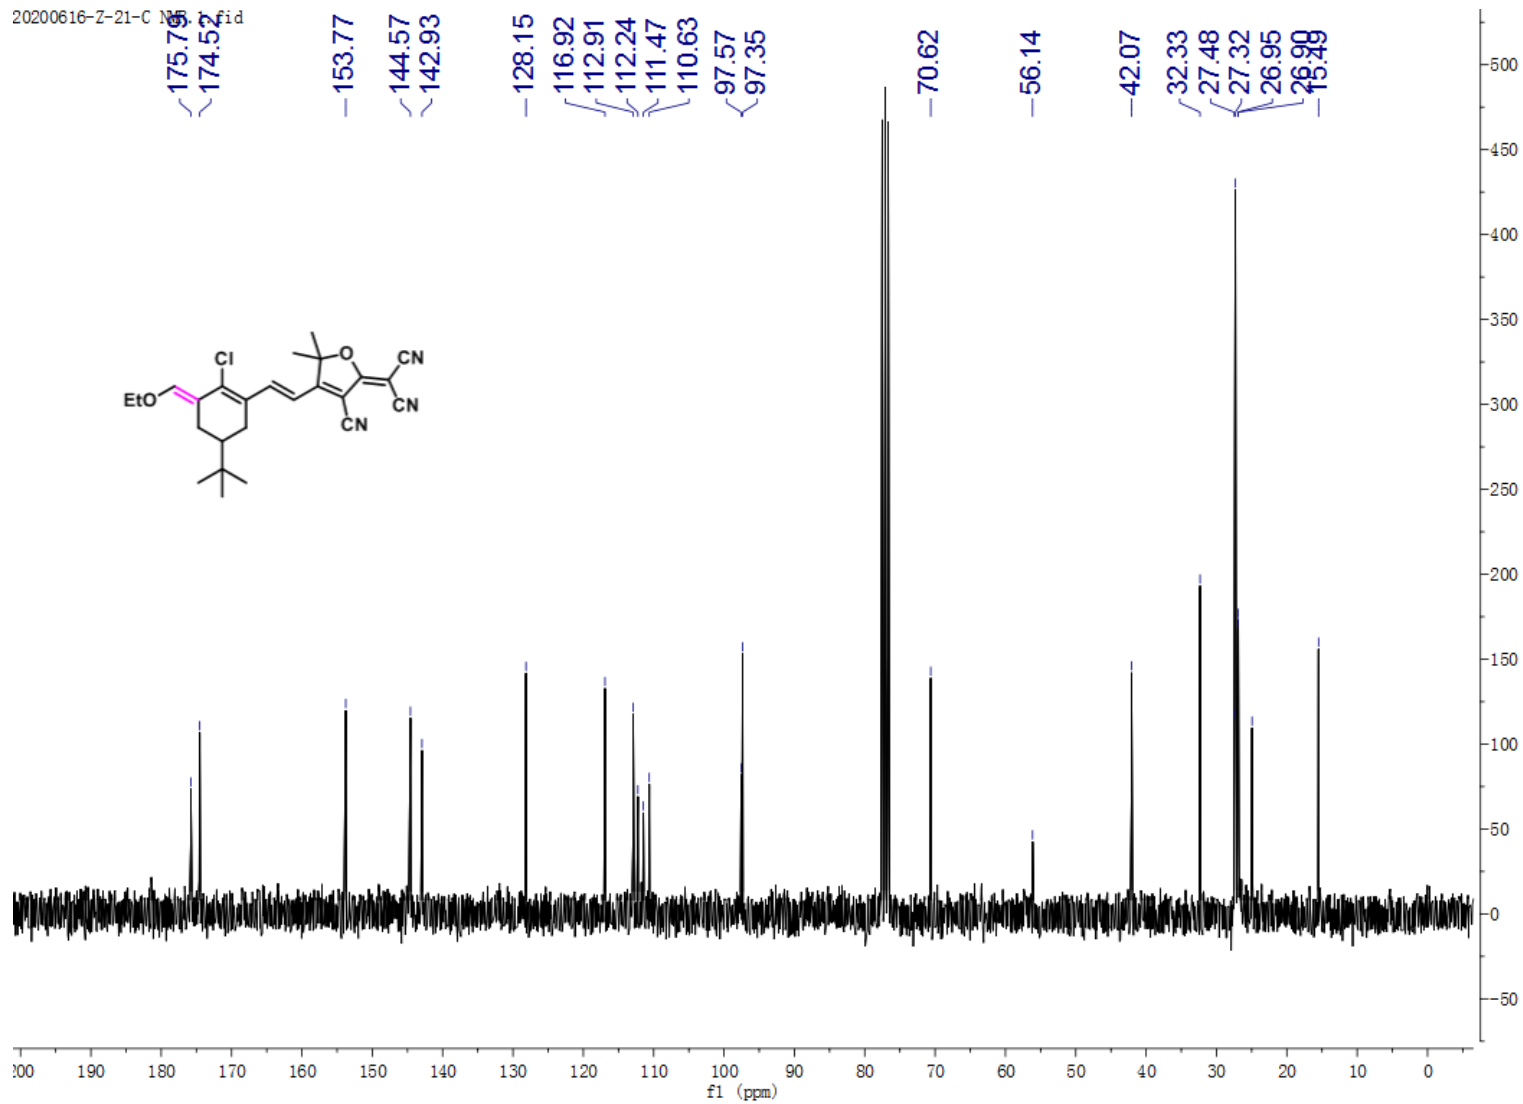

Figure S21. <sup>13</sup>C NMR spectrum of compound TCF-A1.

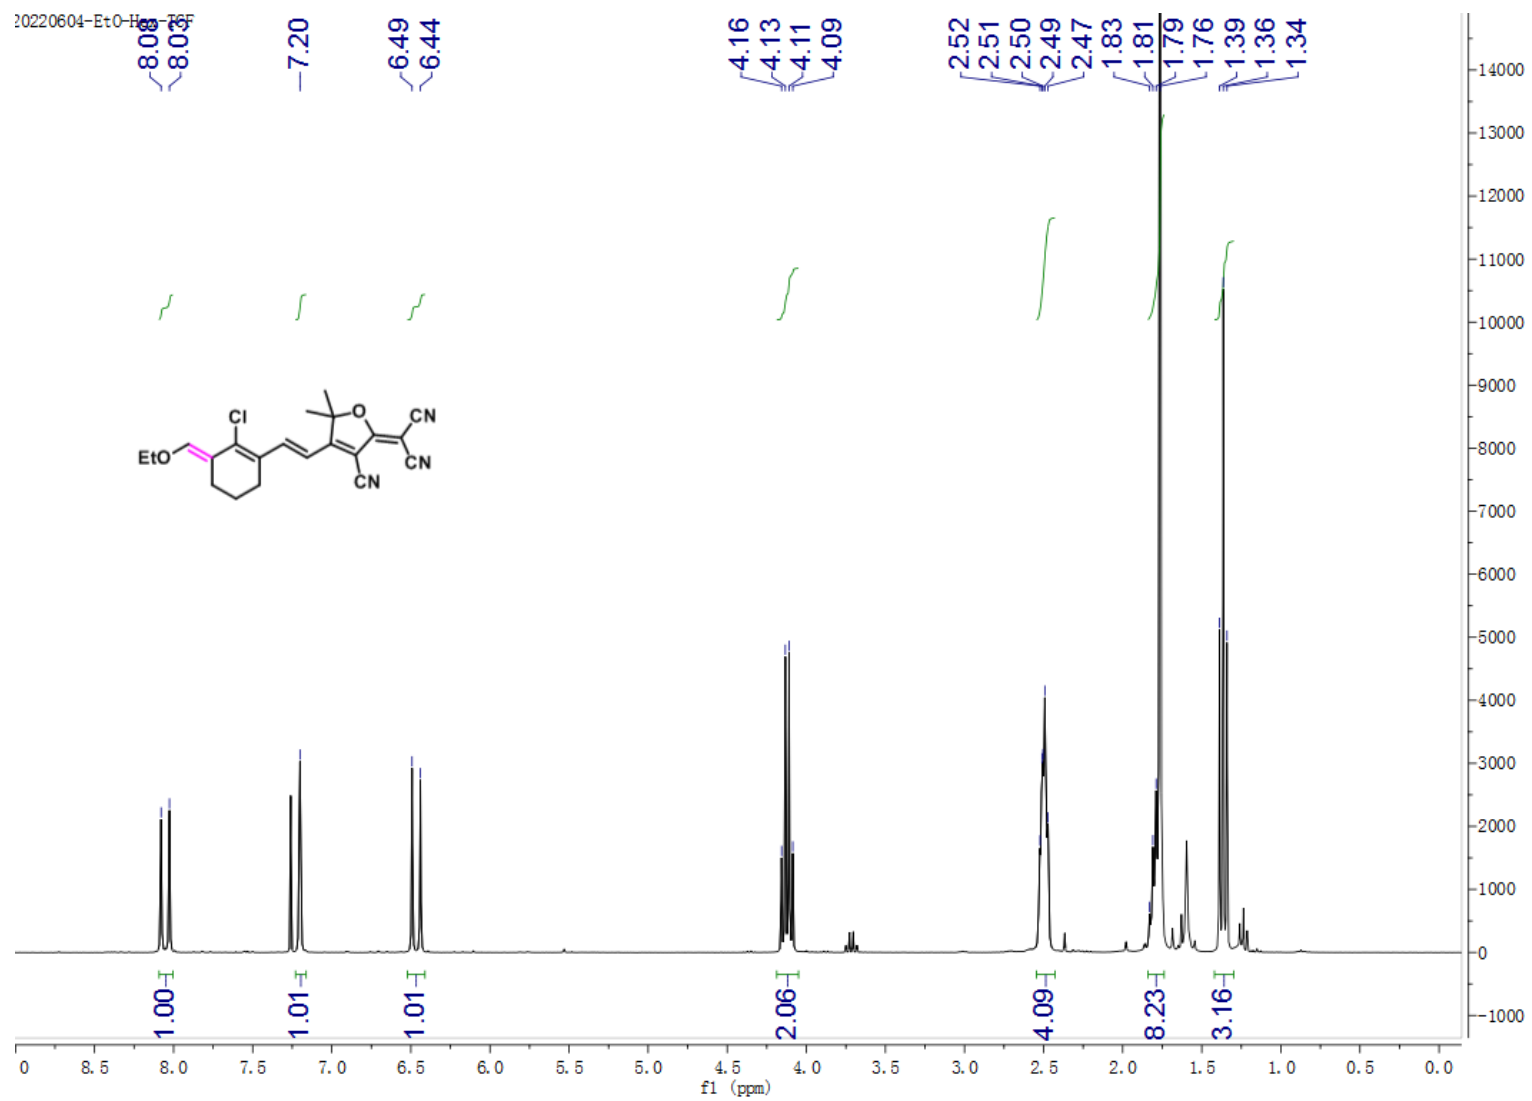

Figure S22. <sup>1</sup>H NMR spectrum of compound TCF-A2.

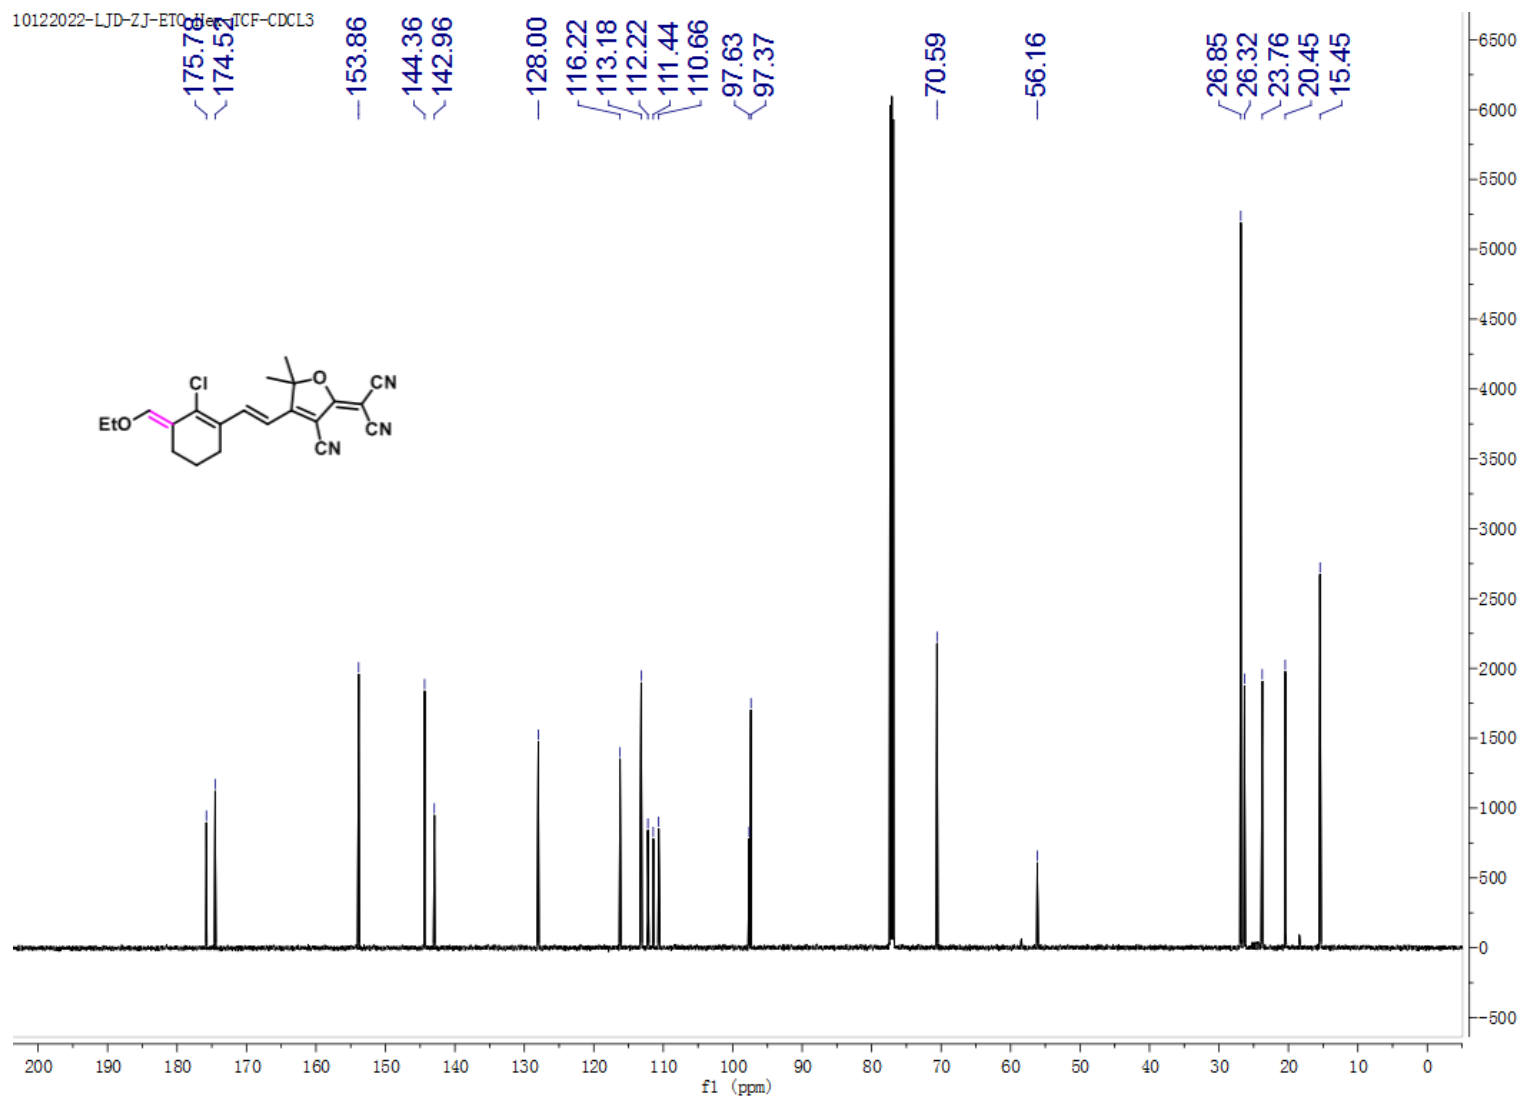

Figure S23.  $^{13}\text{C}$  NMR spectrum of compound TCF-A2.

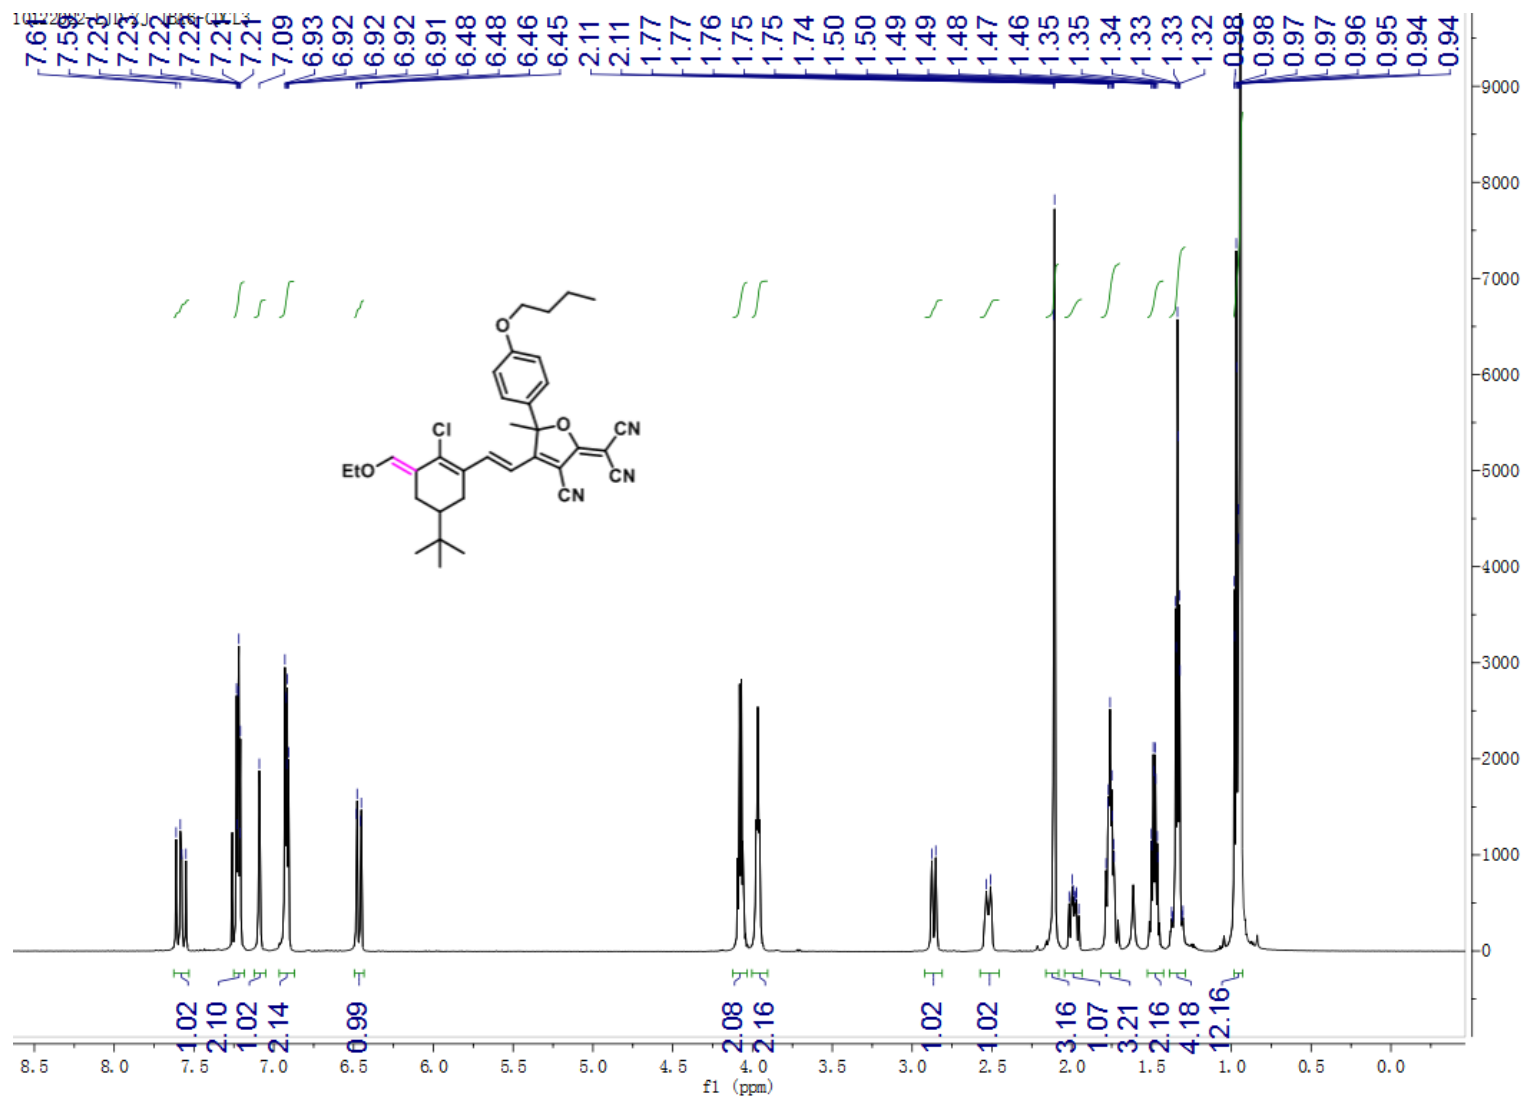

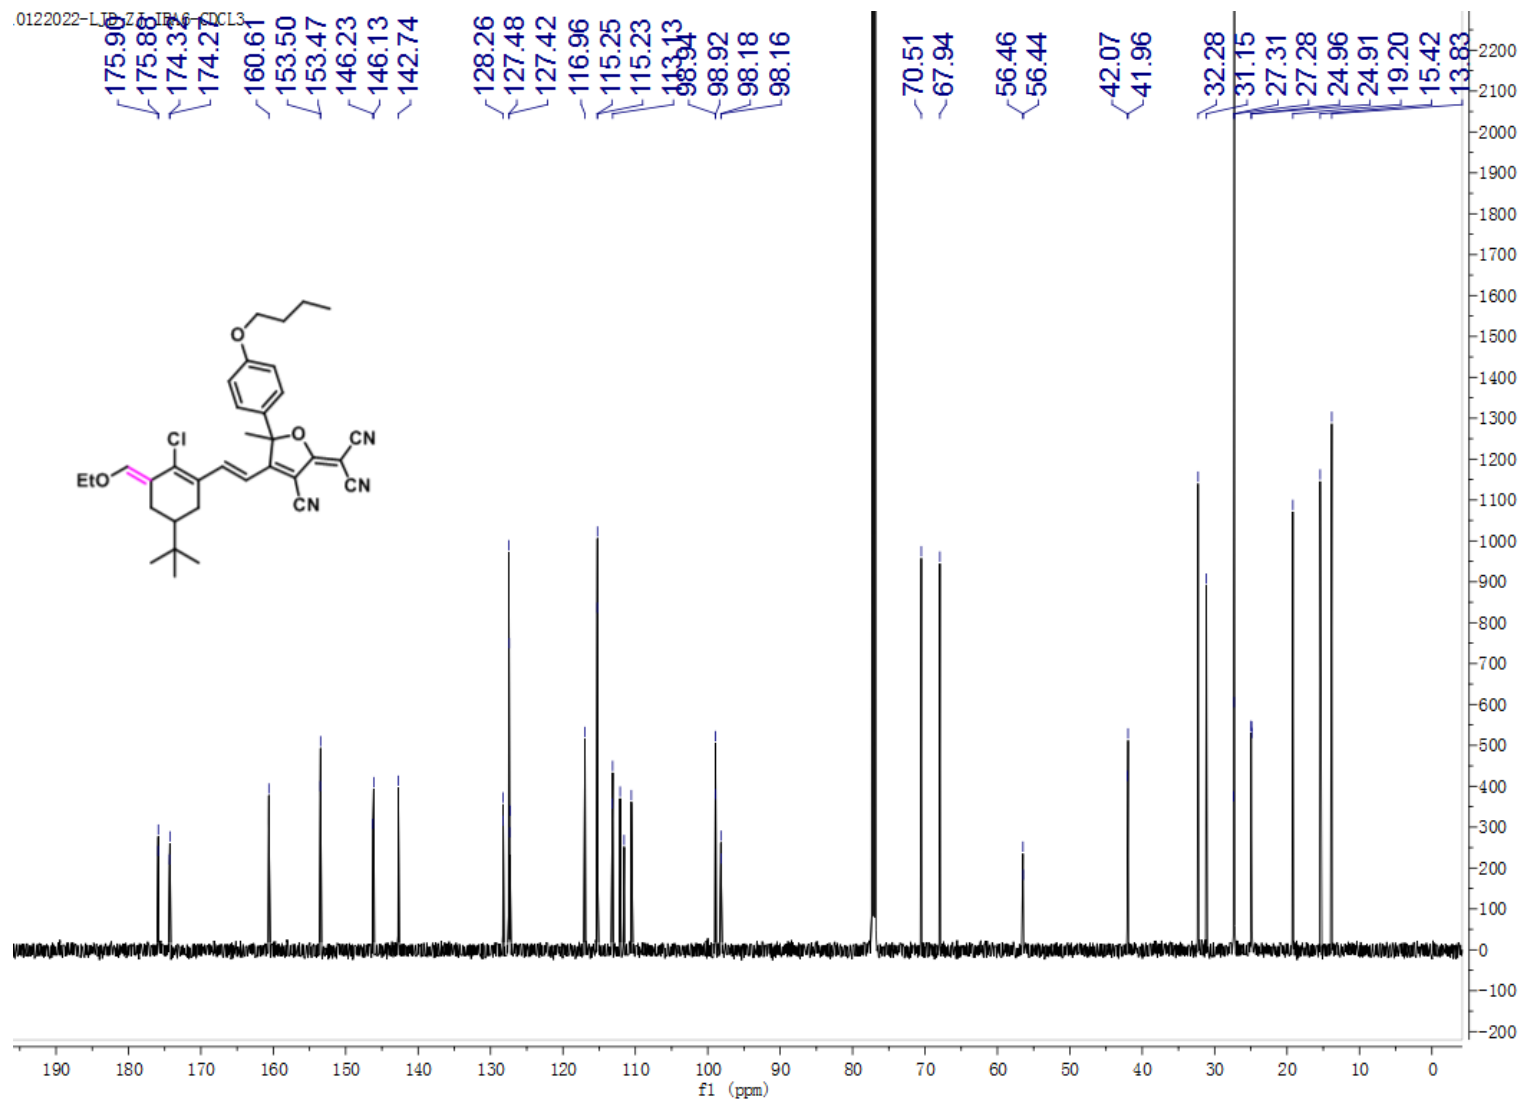

Figure S25.  $^{13}\text{C}$  NMR spectrum of compound TCF-A3.

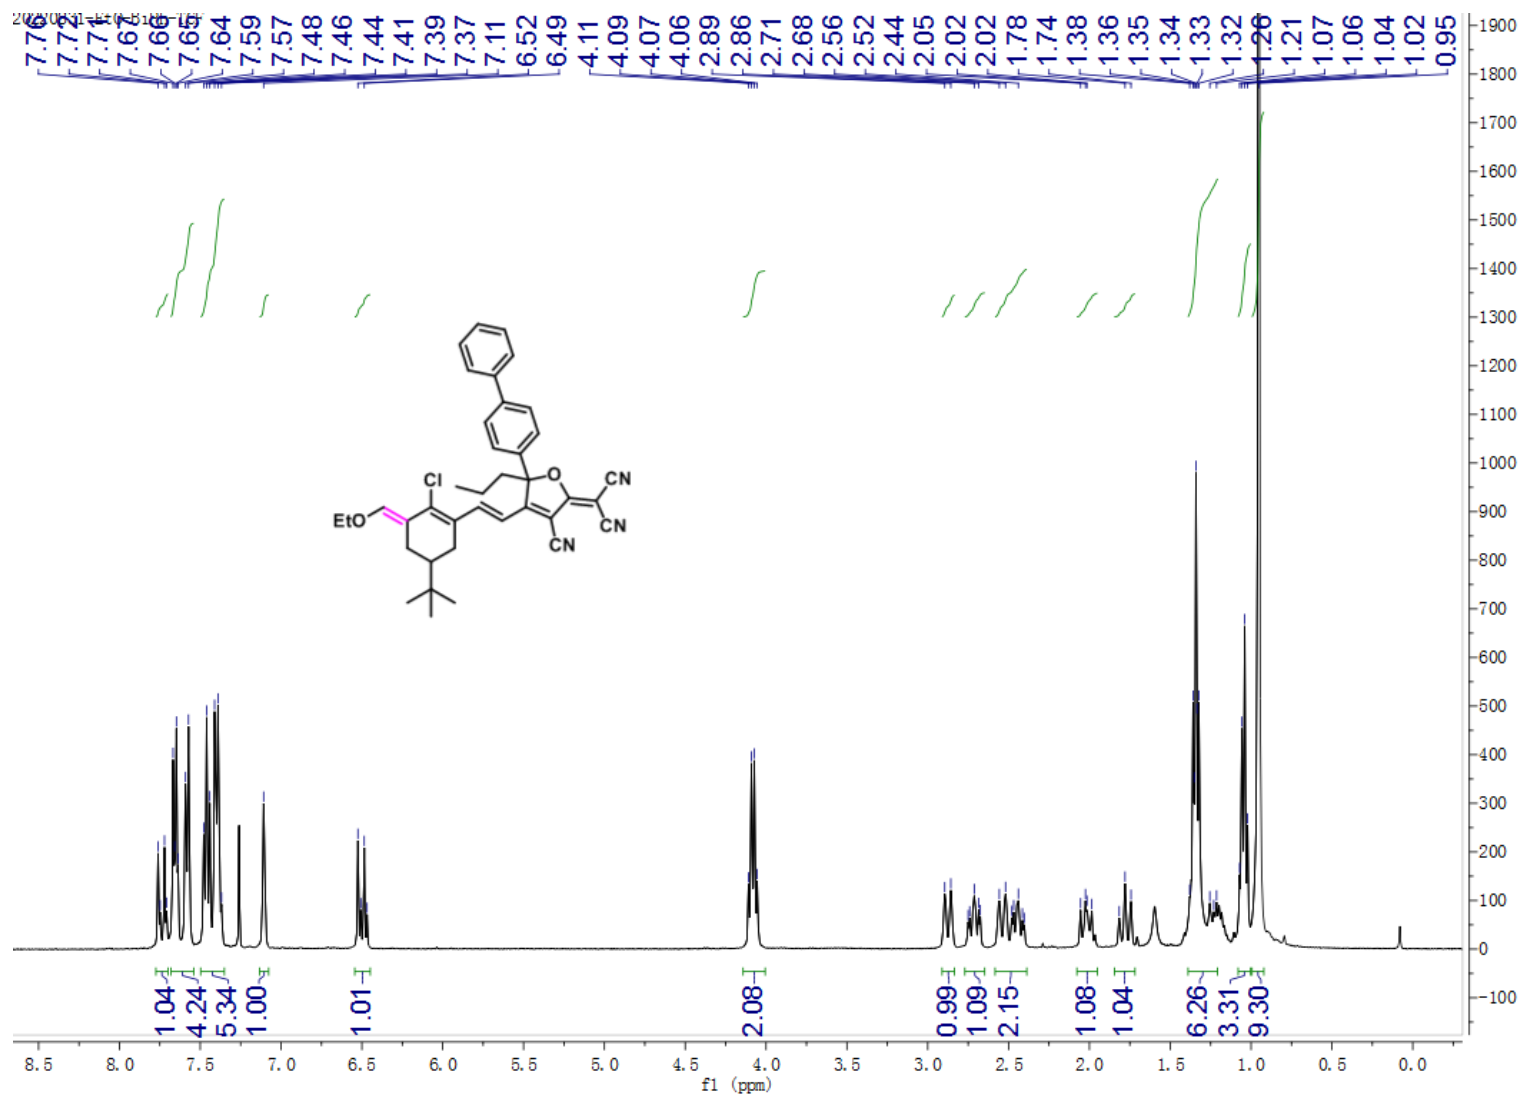

Figure S26. <sup>1</sup>H NMR spectrum of compound TCF-A4.



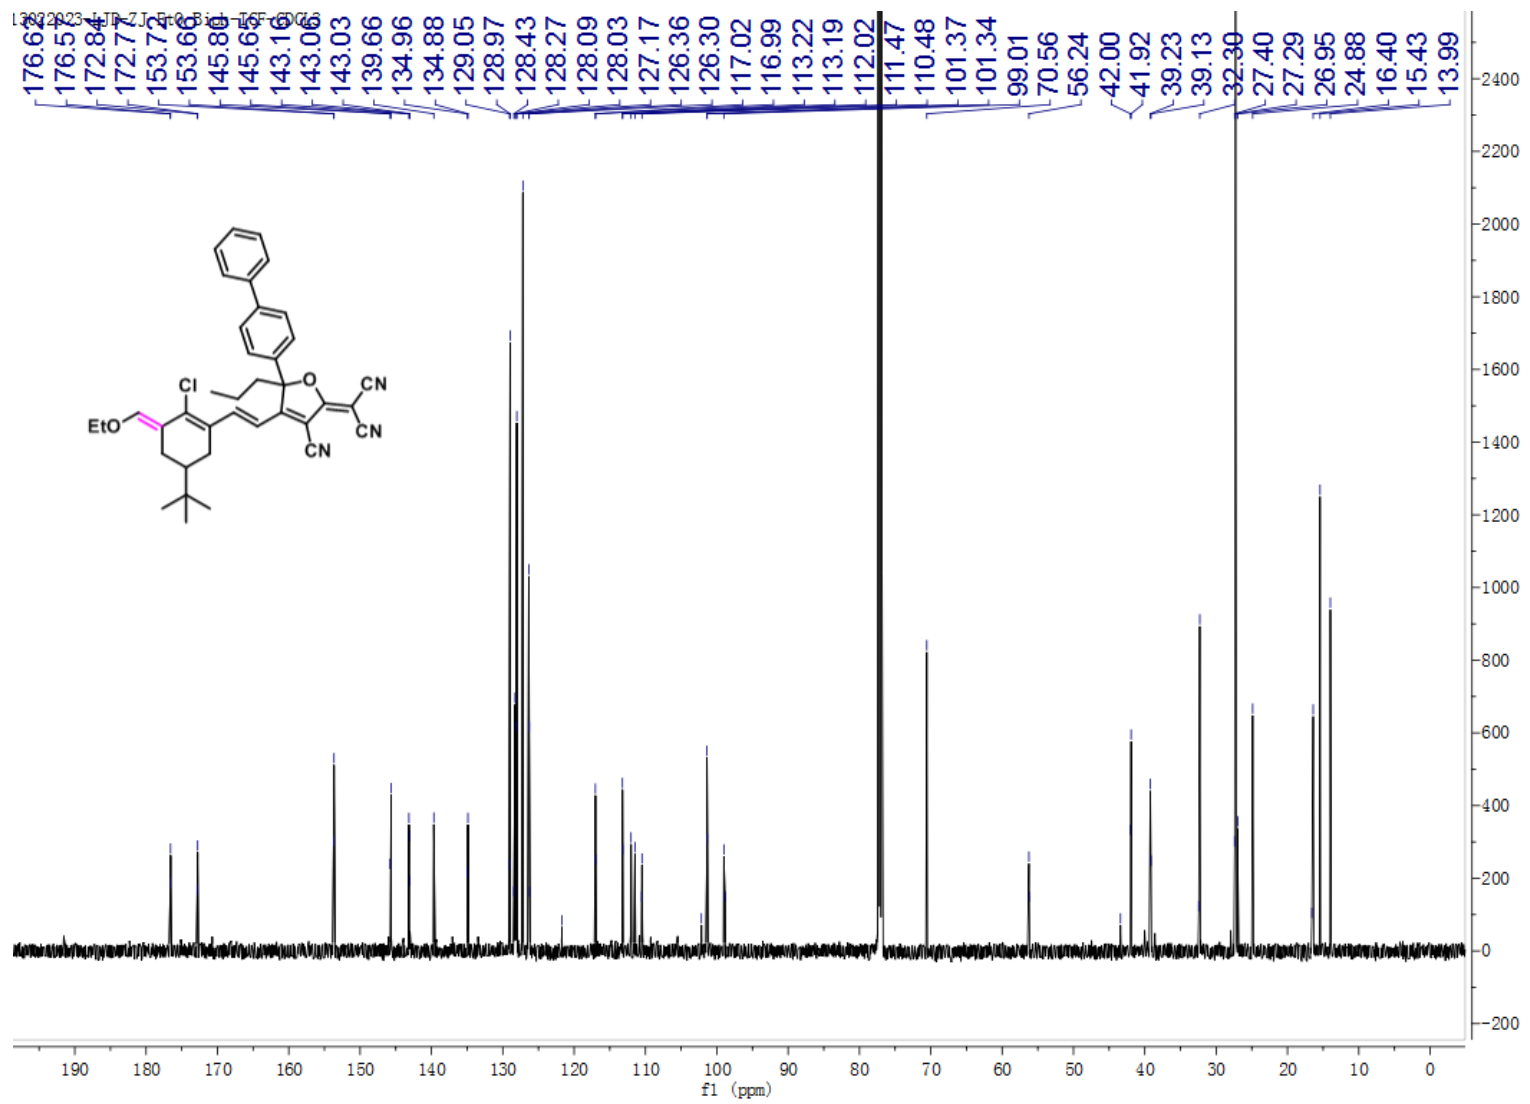

Figure S27  $^{13}\text{C}$  NMR spectrum of compound TCF-A4.

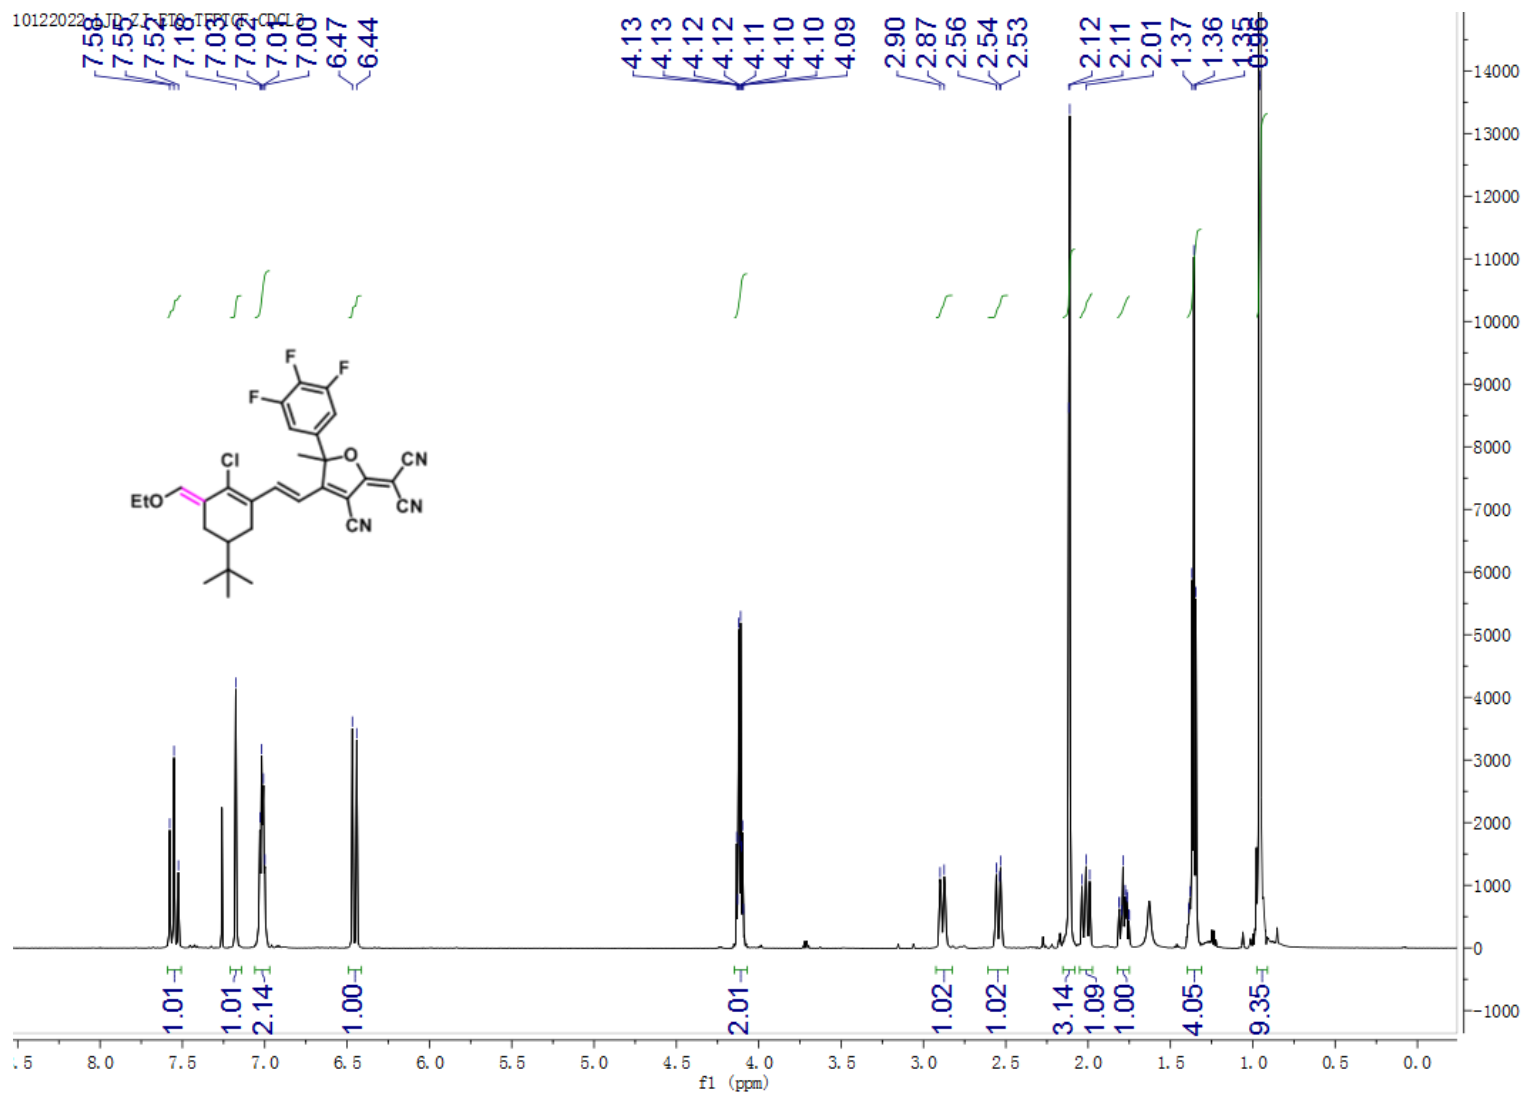

Figure S28. <sup>1</sup>H NMR spectrum of compound TCF-A5.

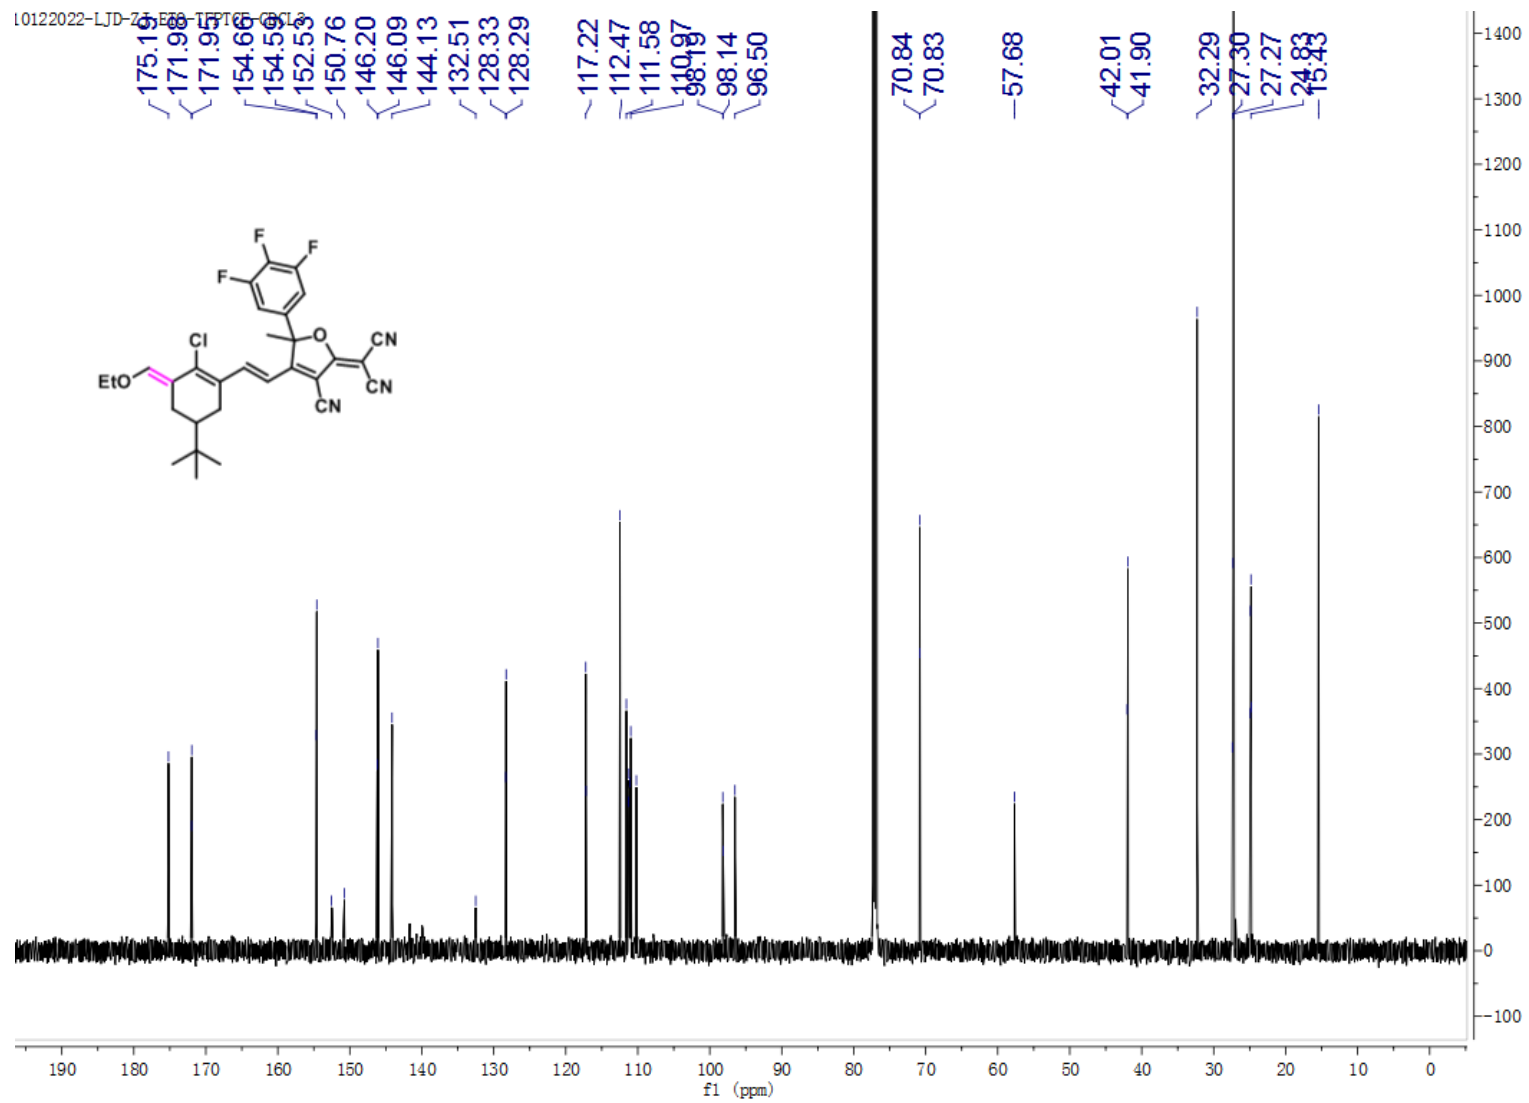

Figure S29. <sup>13</sup>C NMR spectrum of compound TCF-A5.

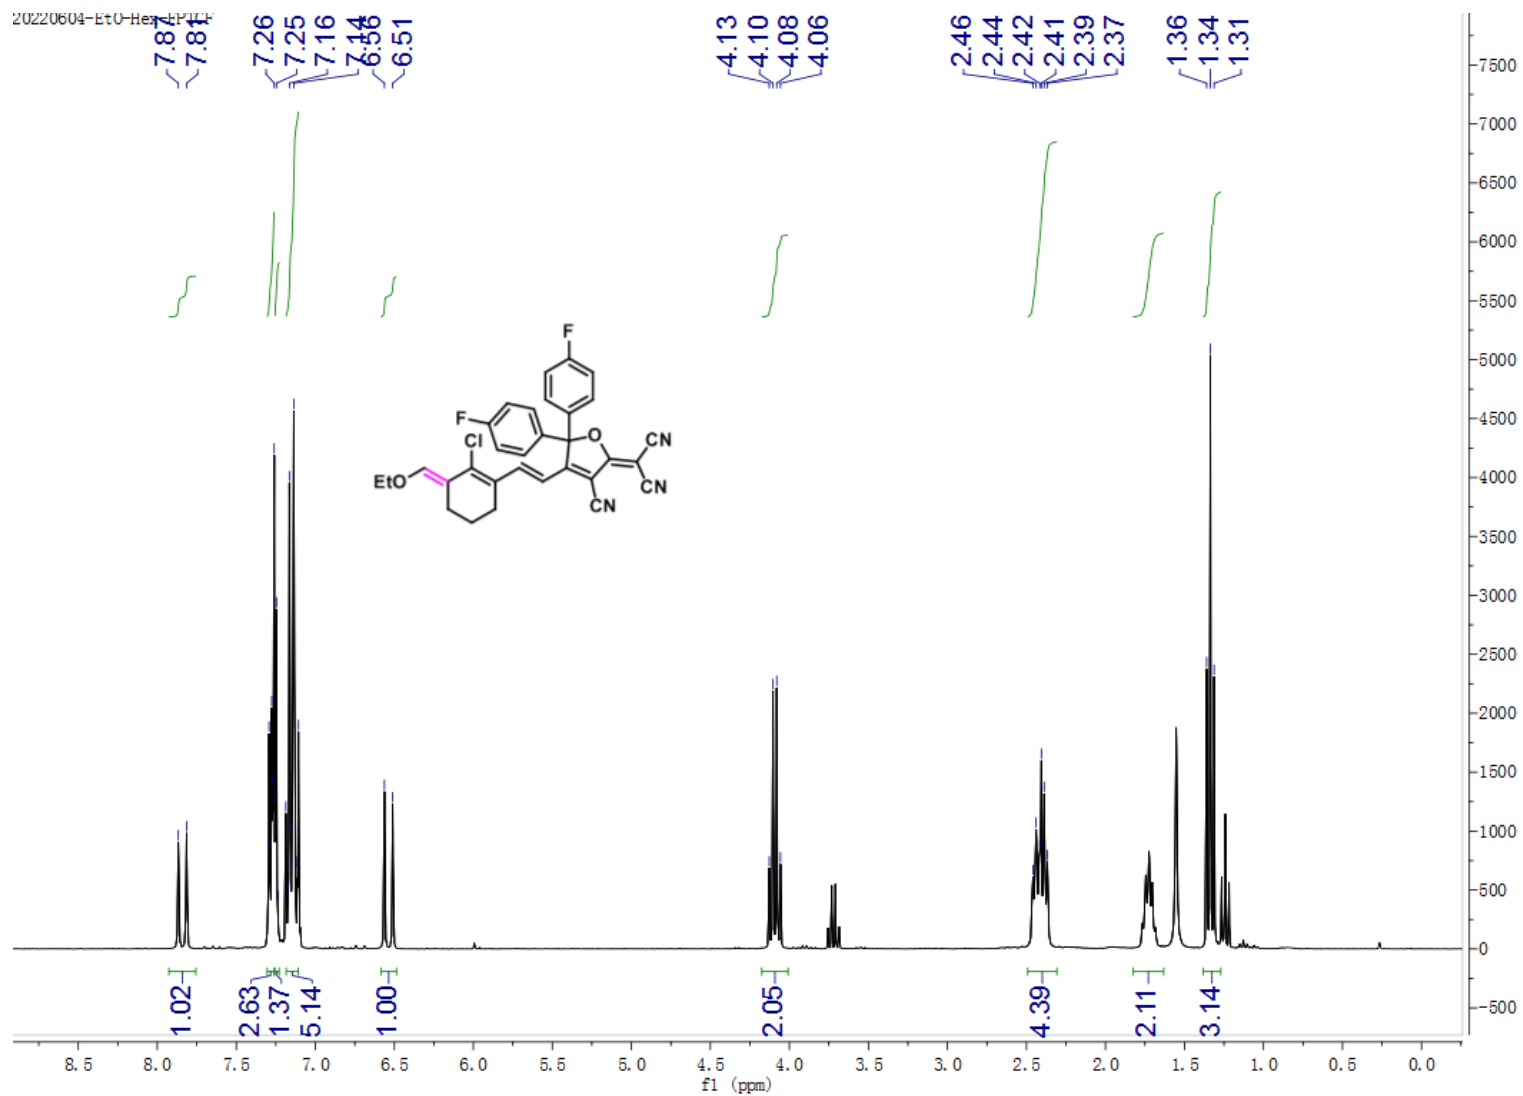

Figure S30. <sup>1</sup>H NMR spectrum of compound TCF-A6.

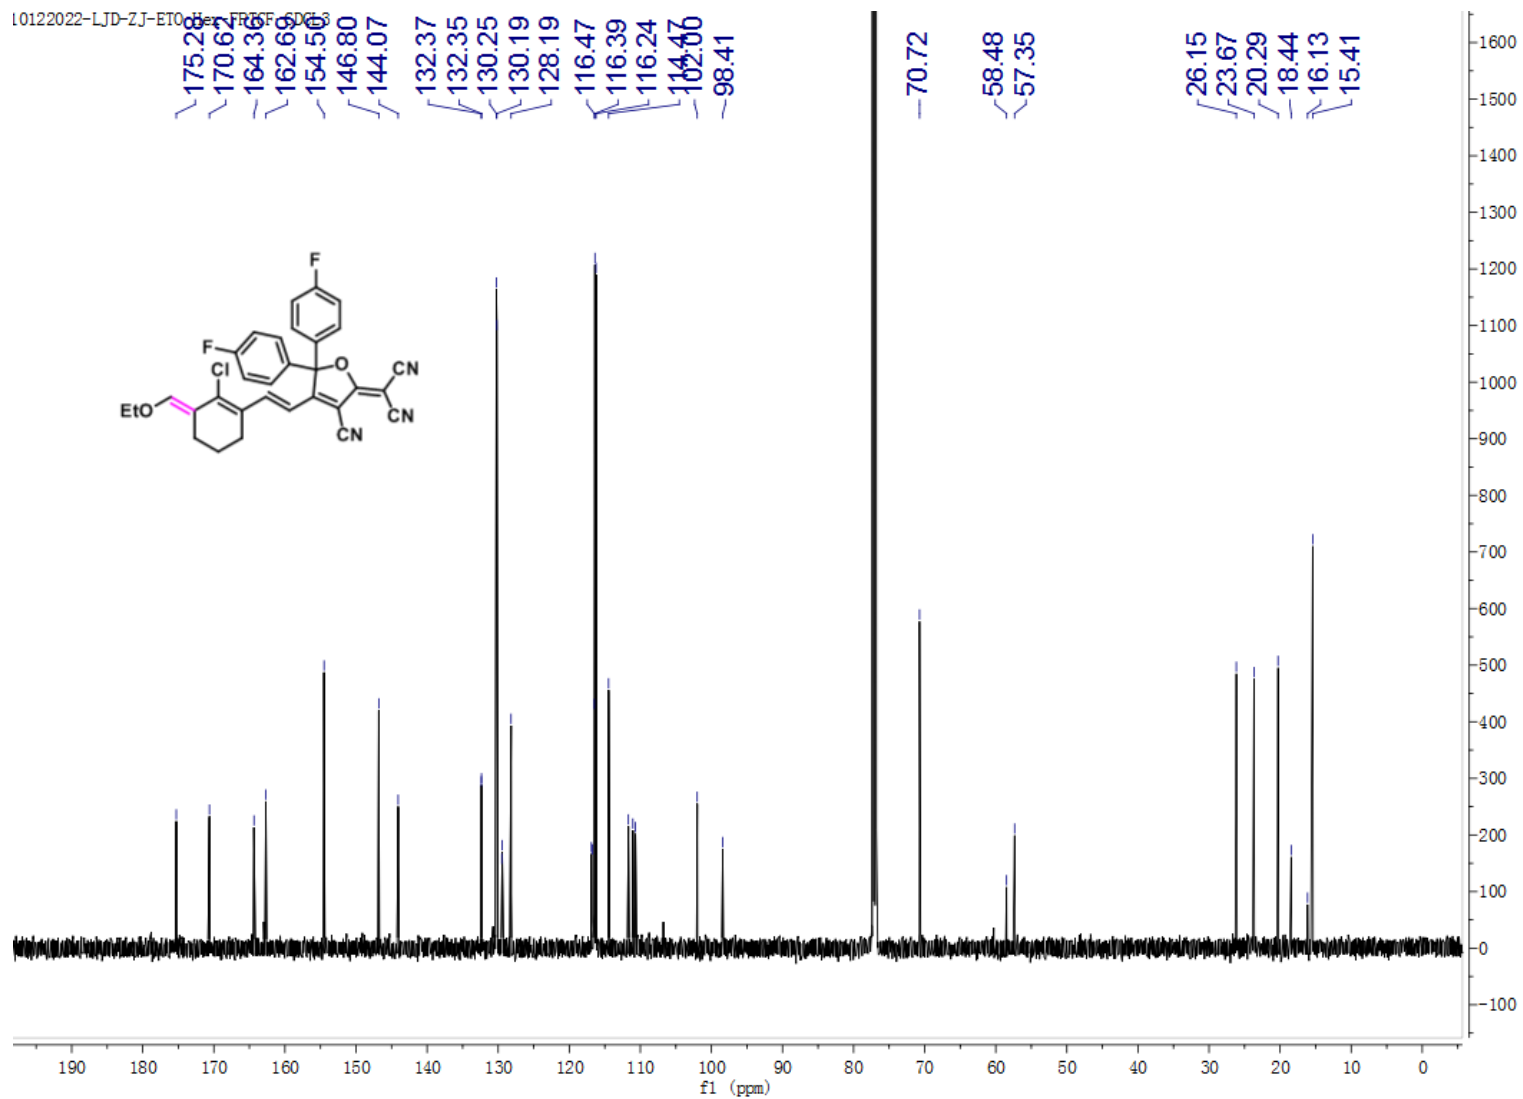

Figure S31.  $^{13}\text{C}$  NMR spectrum of compound TCF-A6.

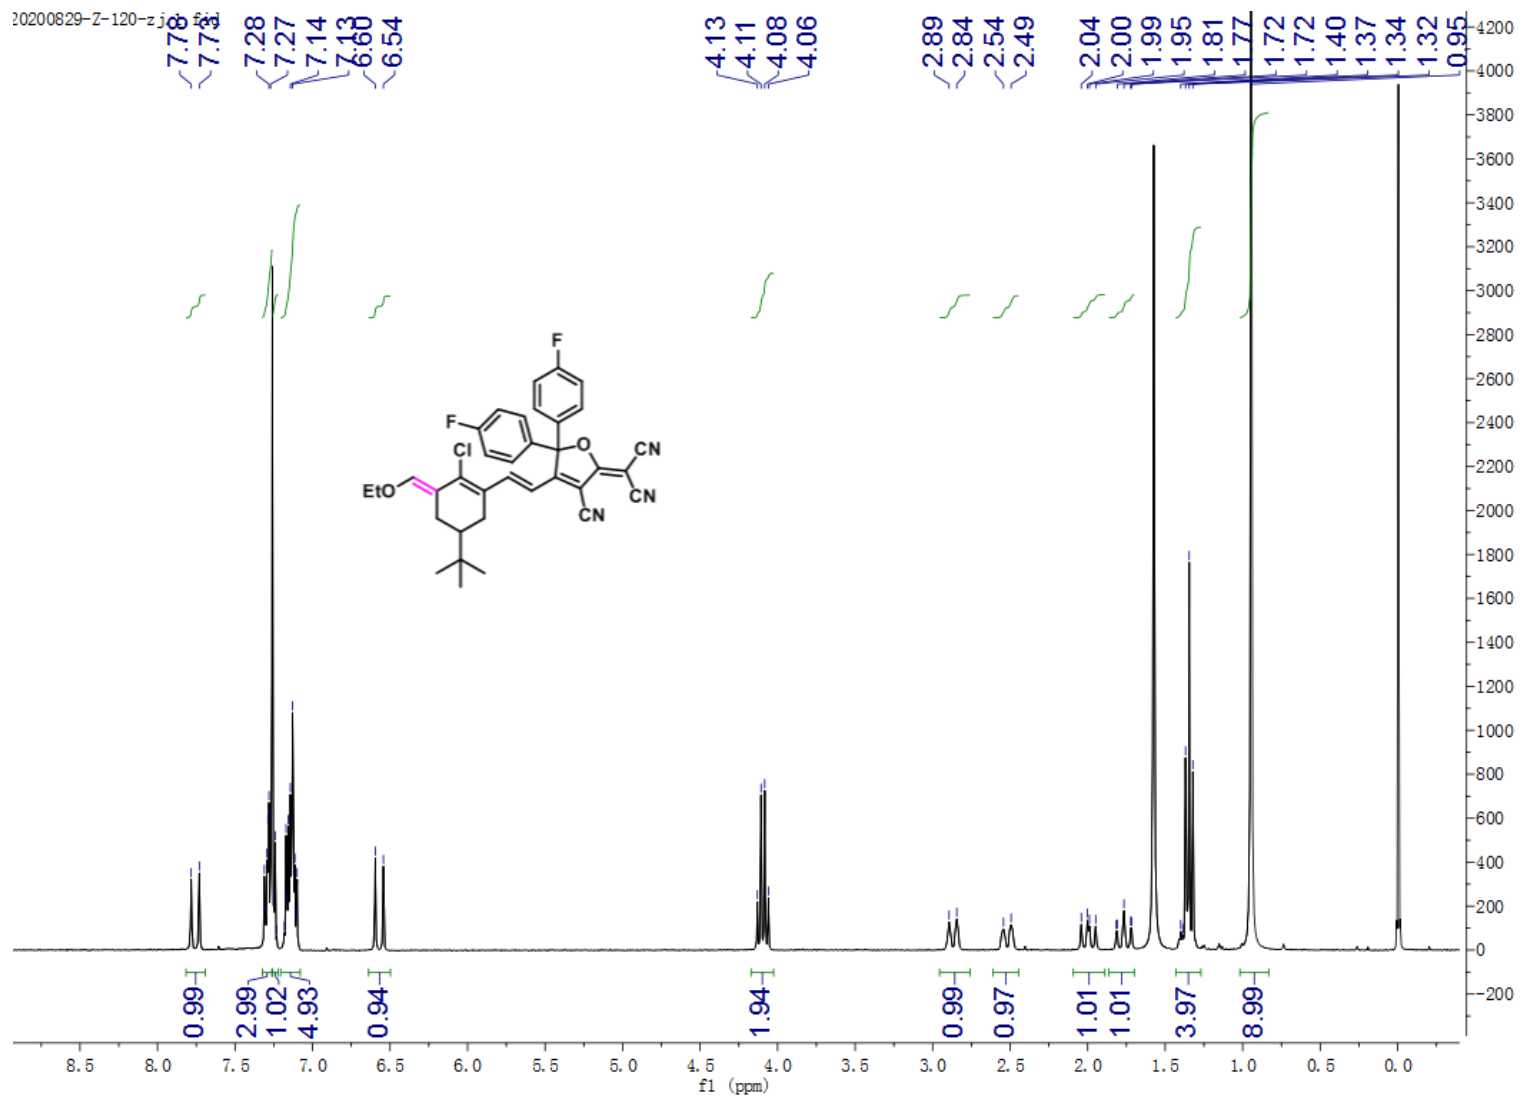

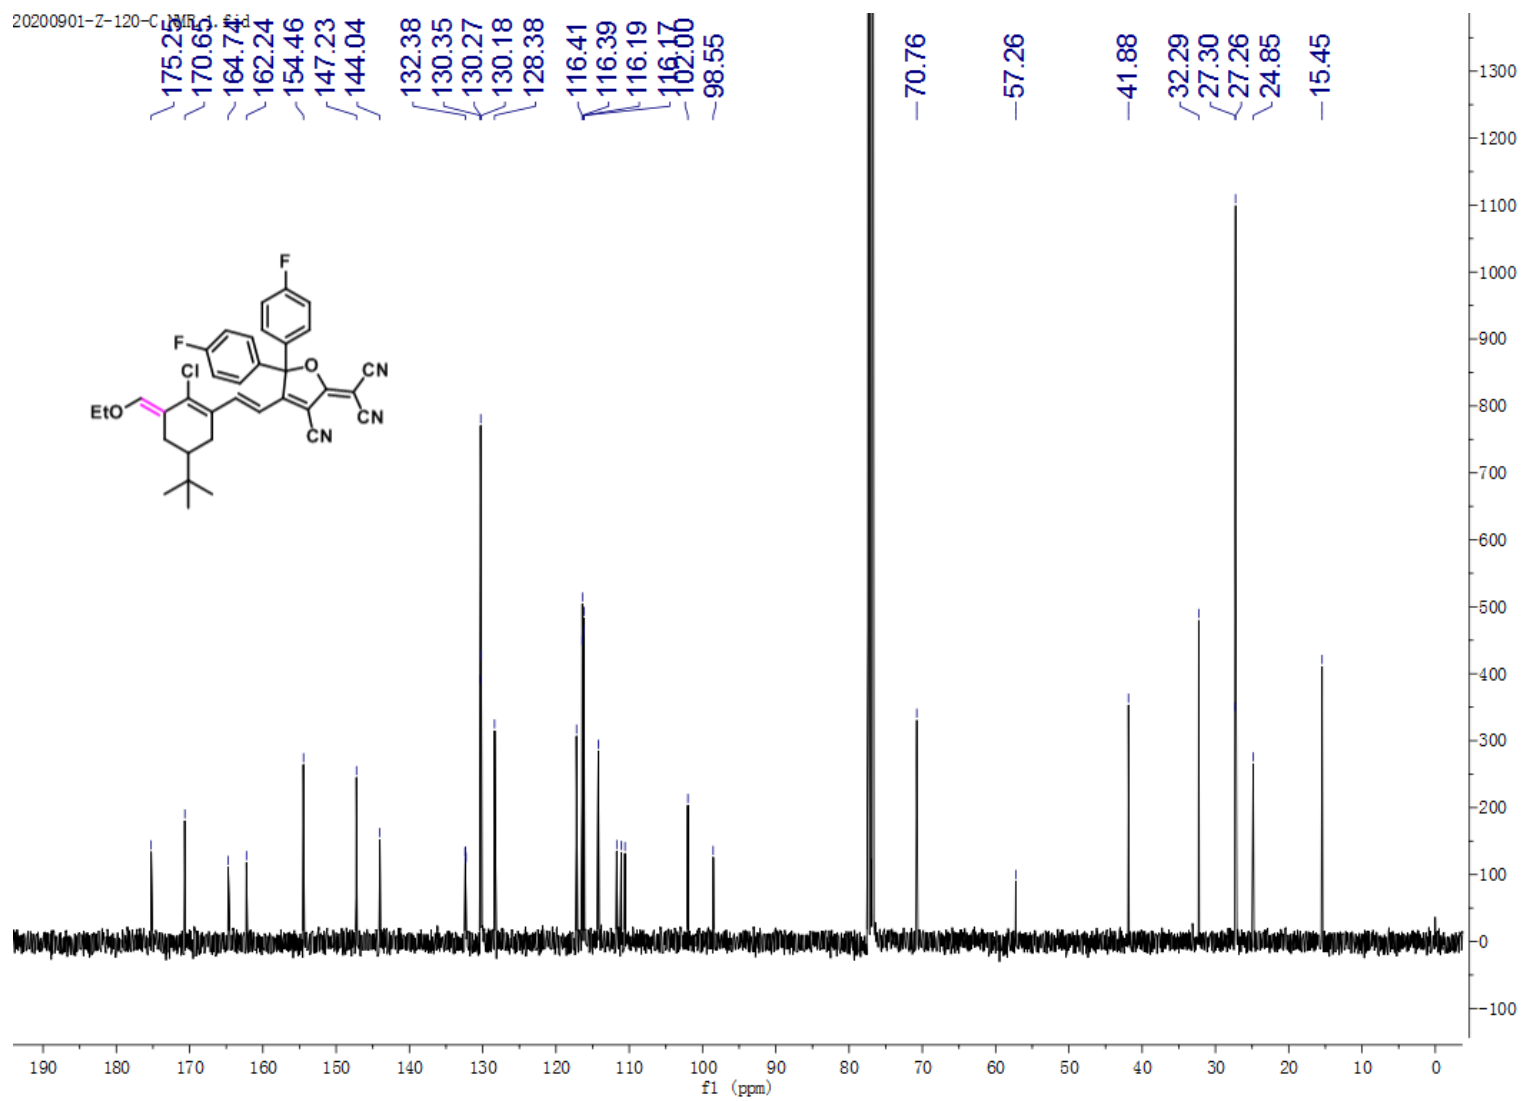

Figure S33. <sup>13</sup>C NMR spectrum of compound TCF-A7.

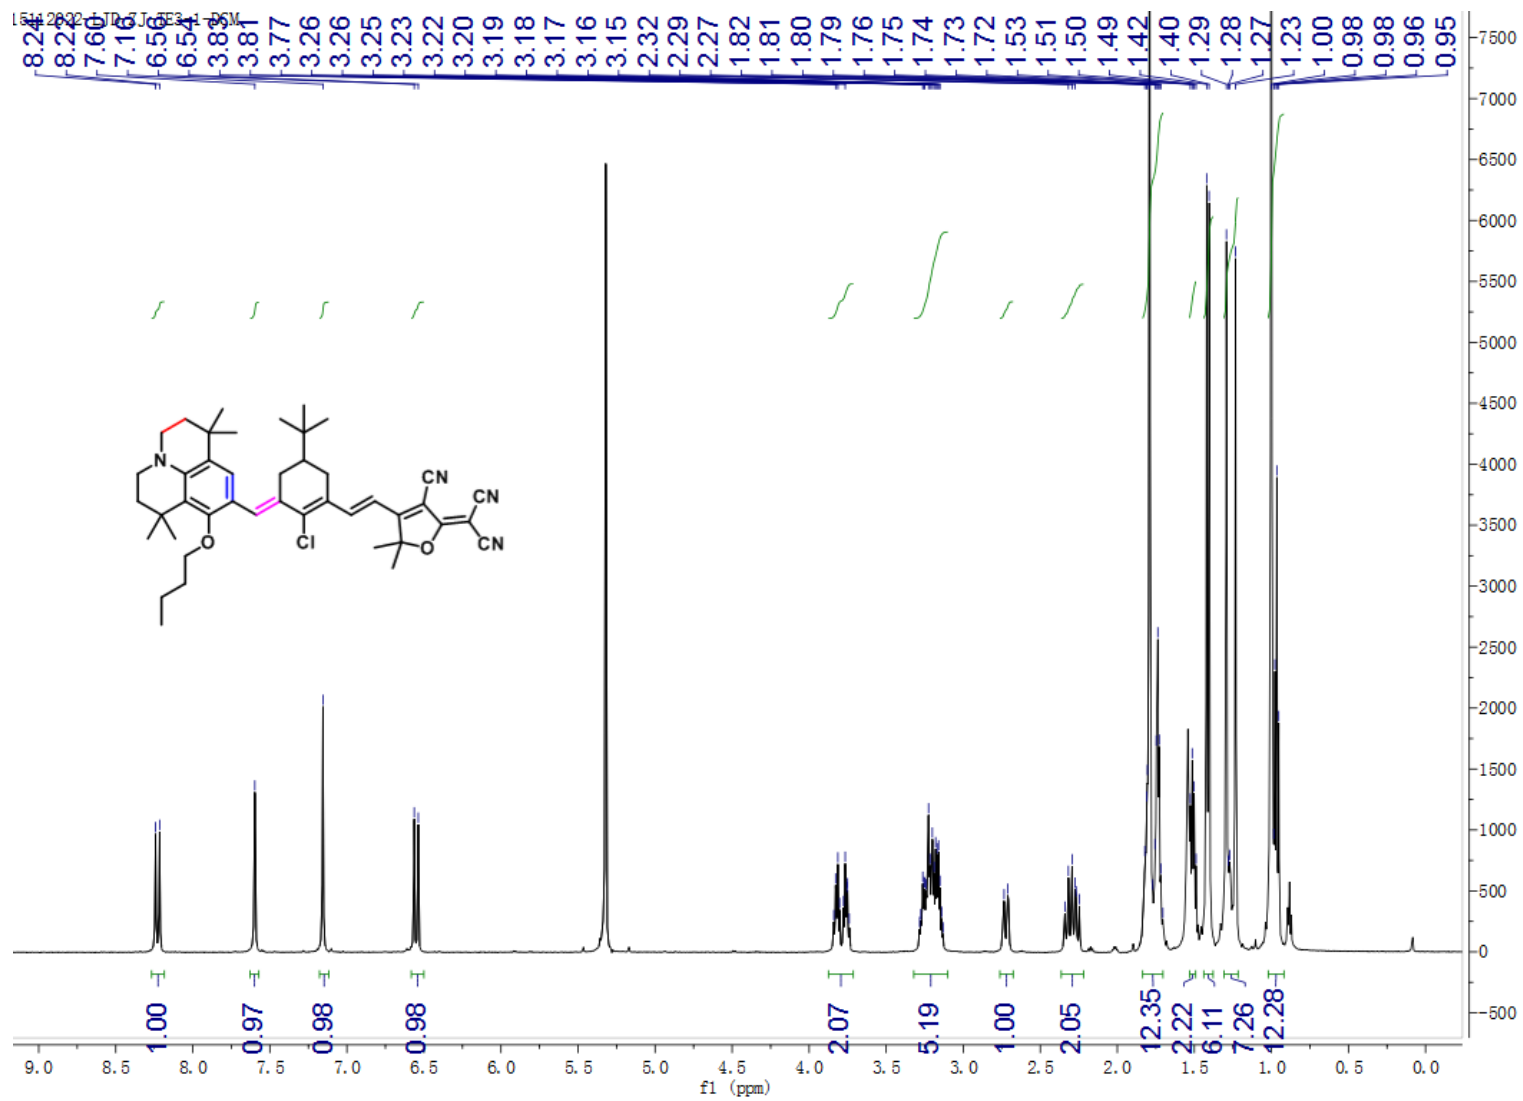

Figure S34.  $^1\text{H}$  NMR spectrum of compound TE-I-1.





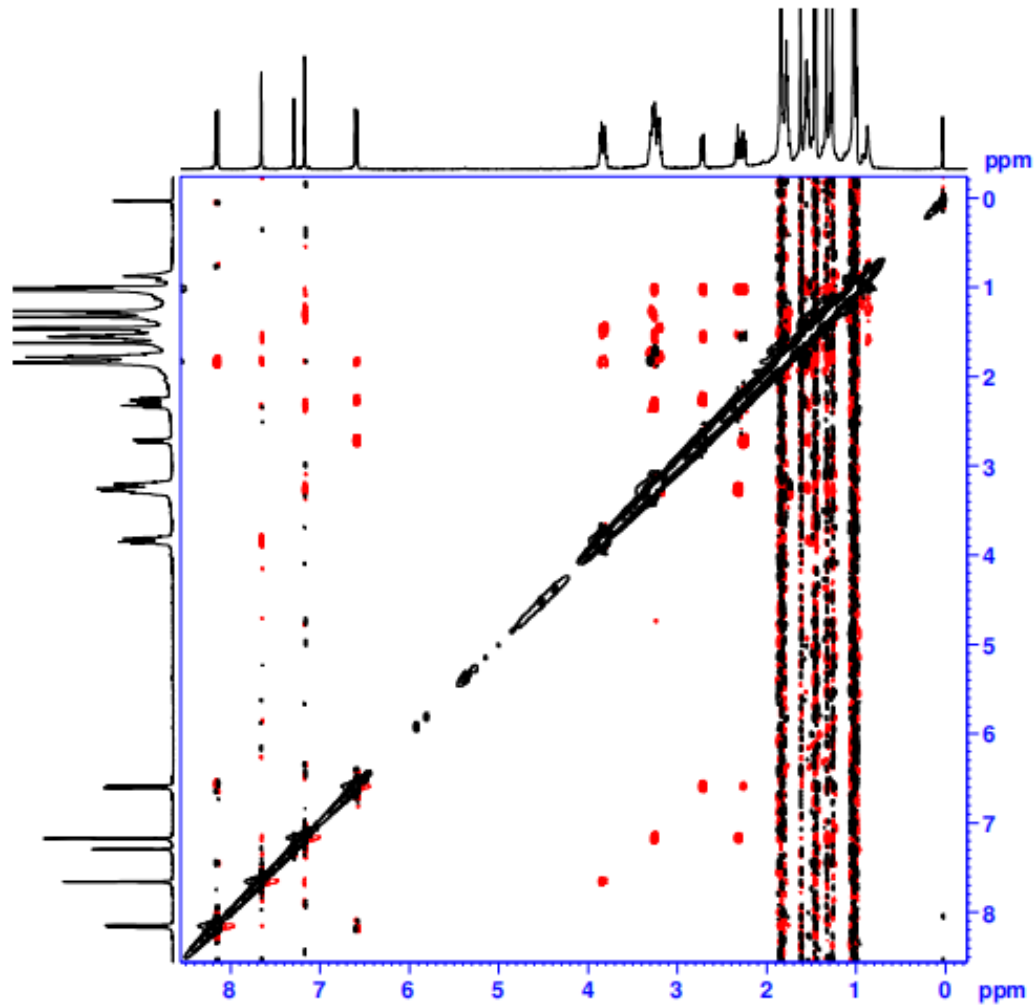

Figure S36. ROESY spectrum of compound TE-I-1.

159-A-TE-3-1 #15 RT: 0.10 AV: 1 NL: 1.81E7  
T: FTMS + p ESI Full lock ms [80.0000-1200.0000]

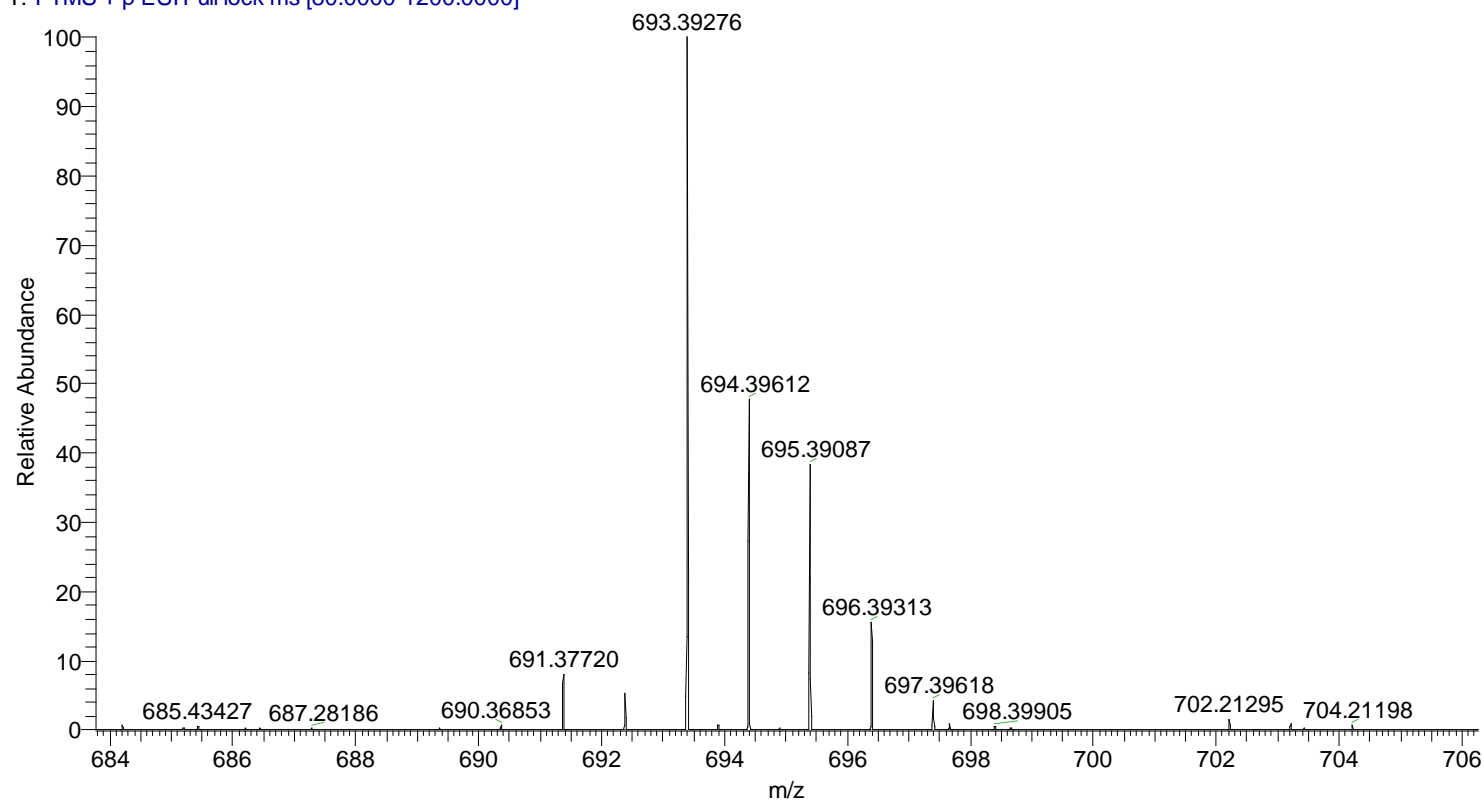

Figure S37. HRMS spectrum of compound TE-I-1.

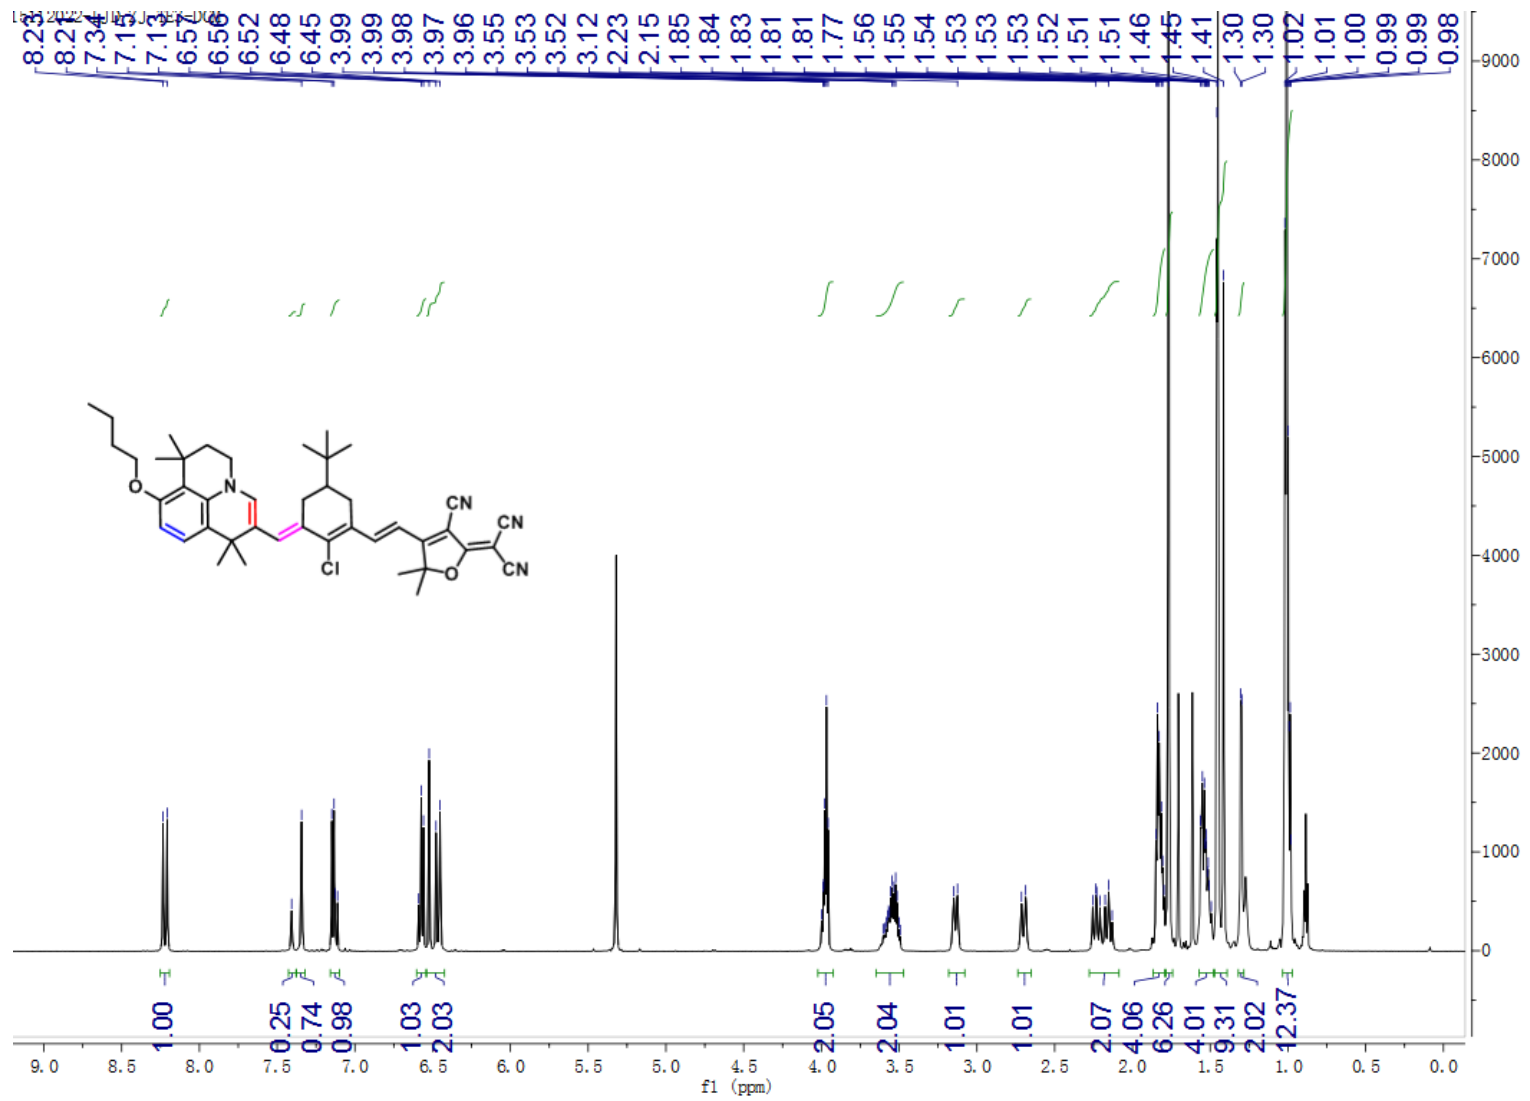

Figure S38.  $^1\text{H}$  NMR spectrum of compound TE-II-1.

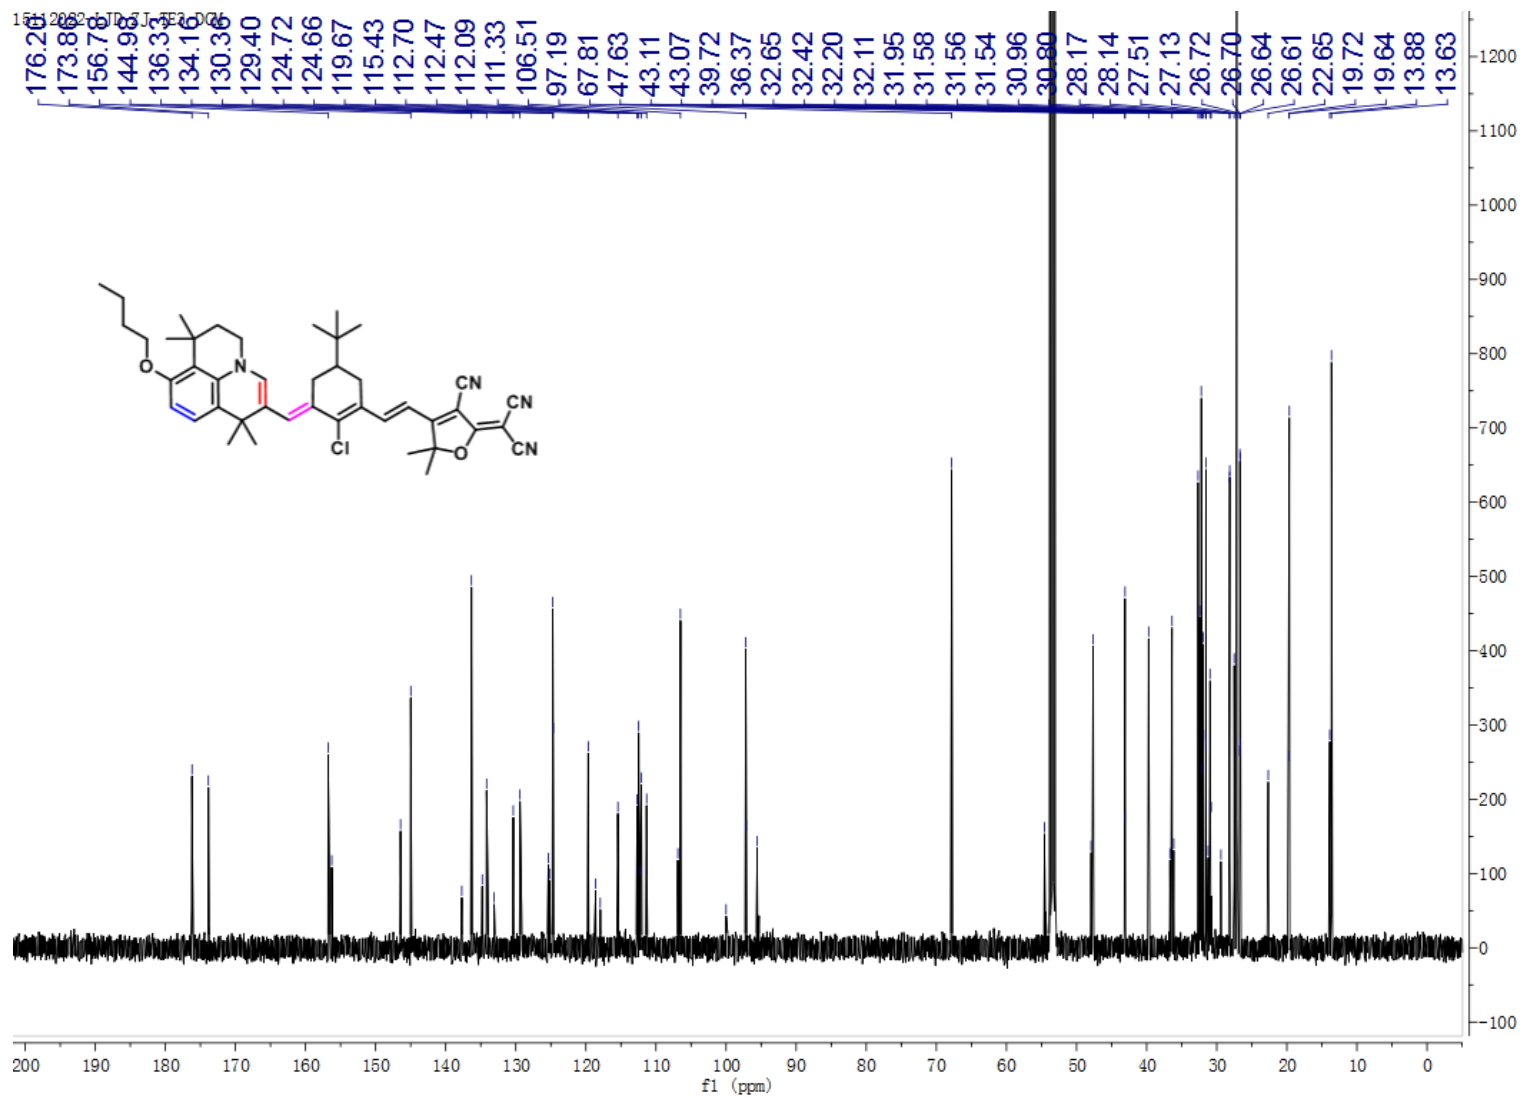

Figure S39.  $^{13}\text{C}$  NMR spectrum of compound TE-II-1.

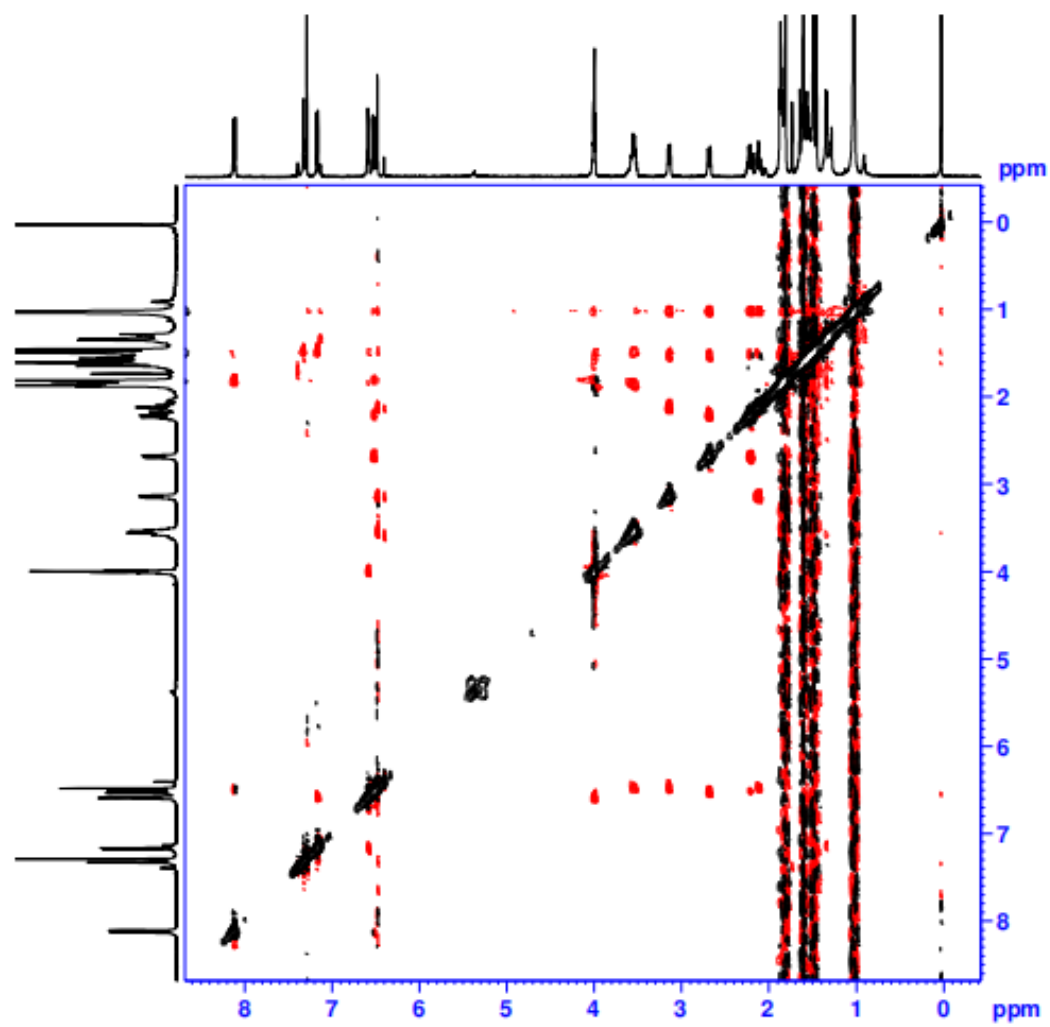

Figure S40 ROESY spectrum of compound TE-II-1.

159-A-TE-3 #14 RT: 0.10 AV: 1 NL: 2.24E7  
T: FTMS + p ESI Full lock ms [80.0000-1200.0000]

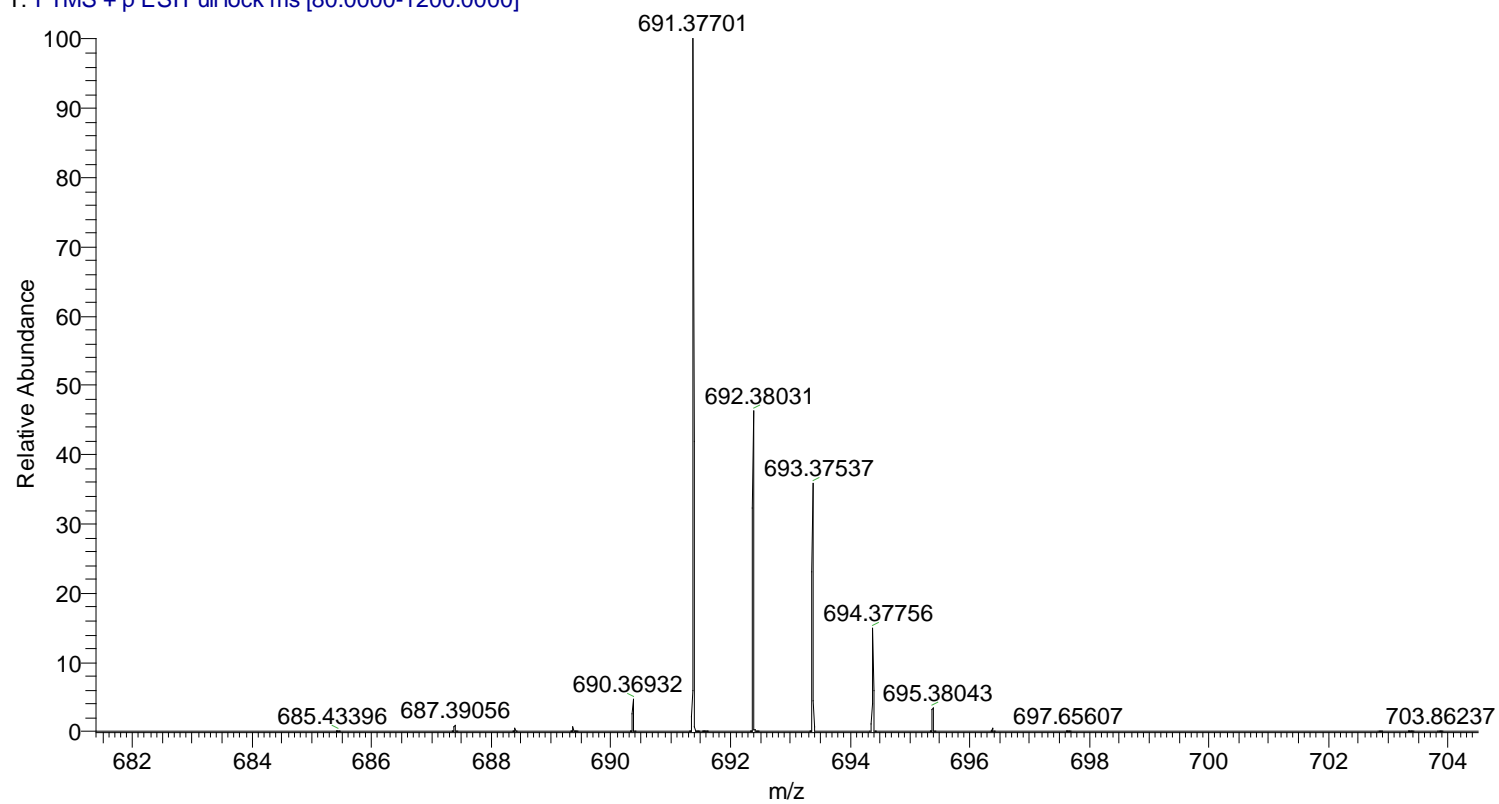

**Figure S41.** HRMS spectrum of compound **TE-II-1**.

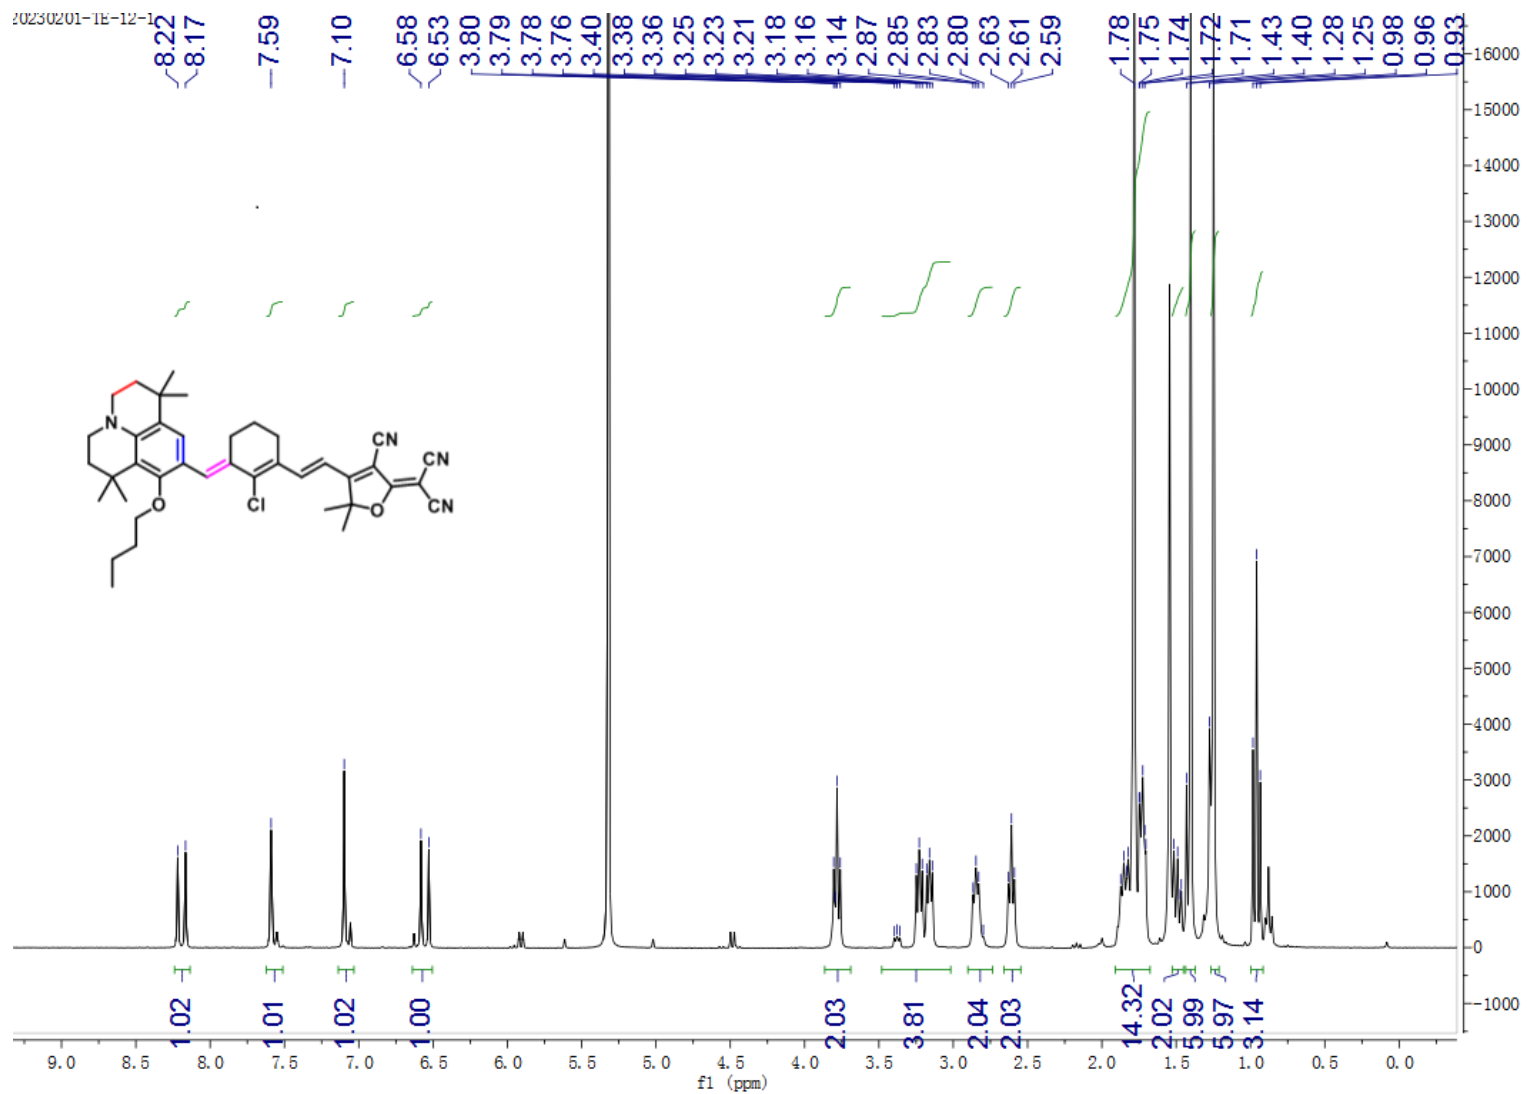

Figure S42. <sup>1</sup>H NMR spectrum of compound TE-I-2.



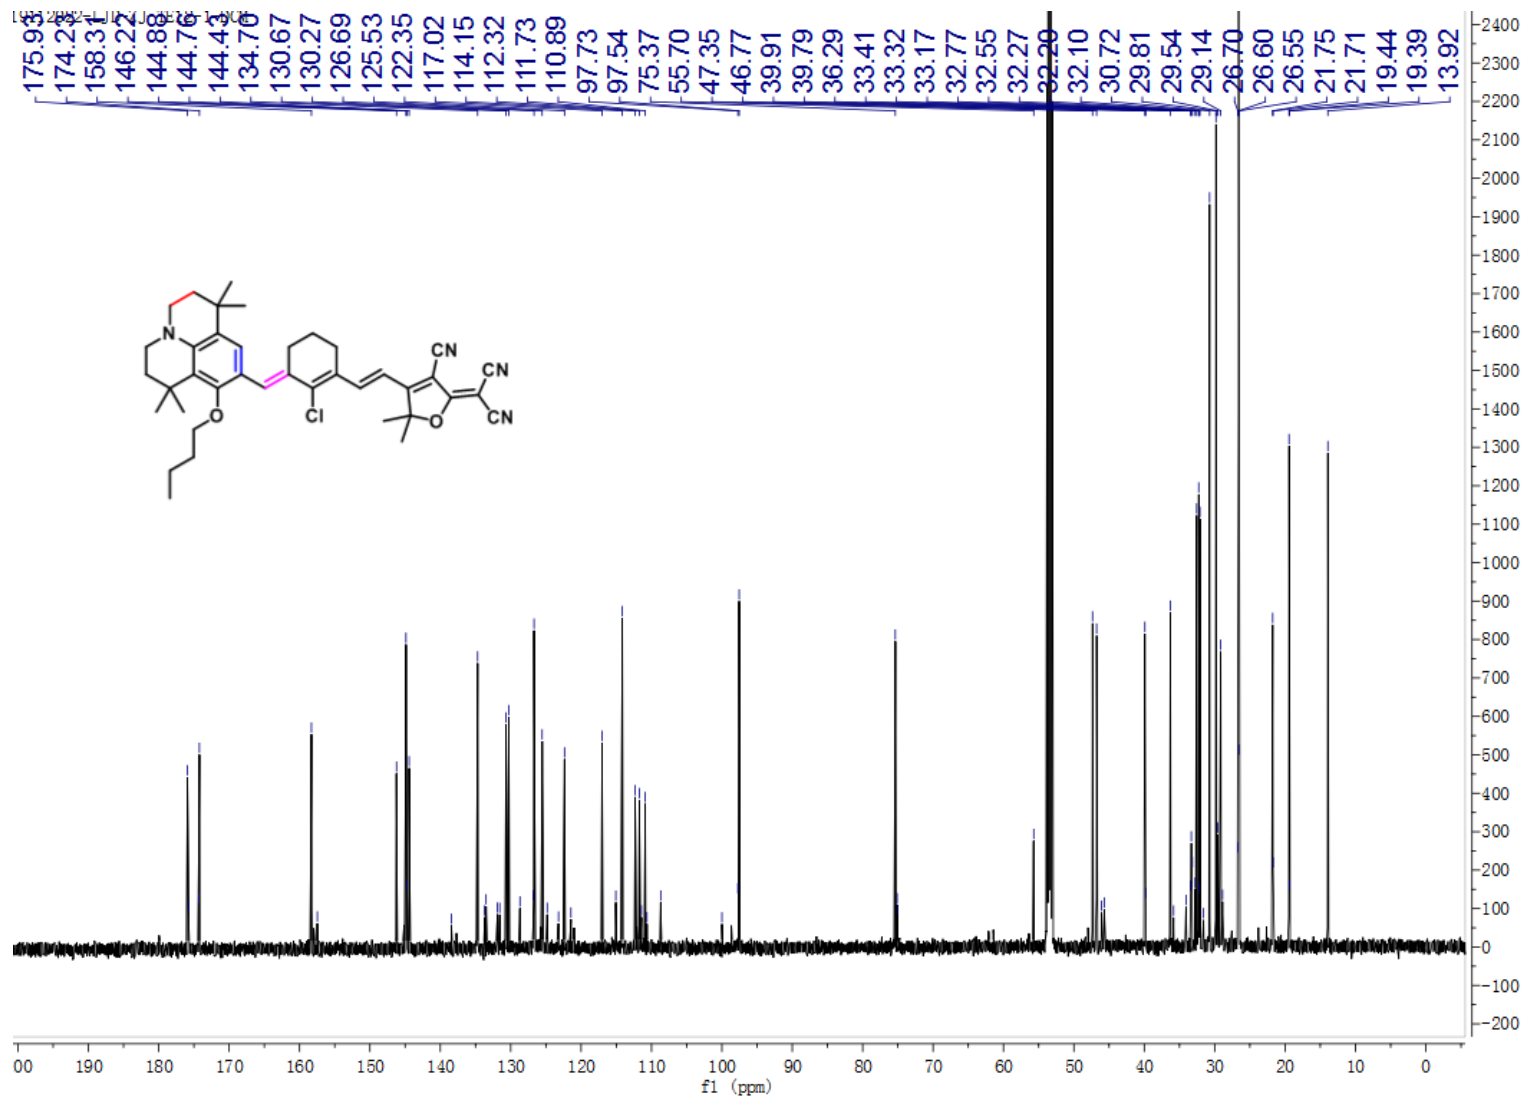

Figure S43. <sup>13</sup>C NMR spectrum of compound TE-I-2.

159-A-TE-13-1 #14 RT: 0.10 AV: 1 NL: 6.49E7  
T: FTMS + p ESI Full lock ms [80.0000-1200.0000]

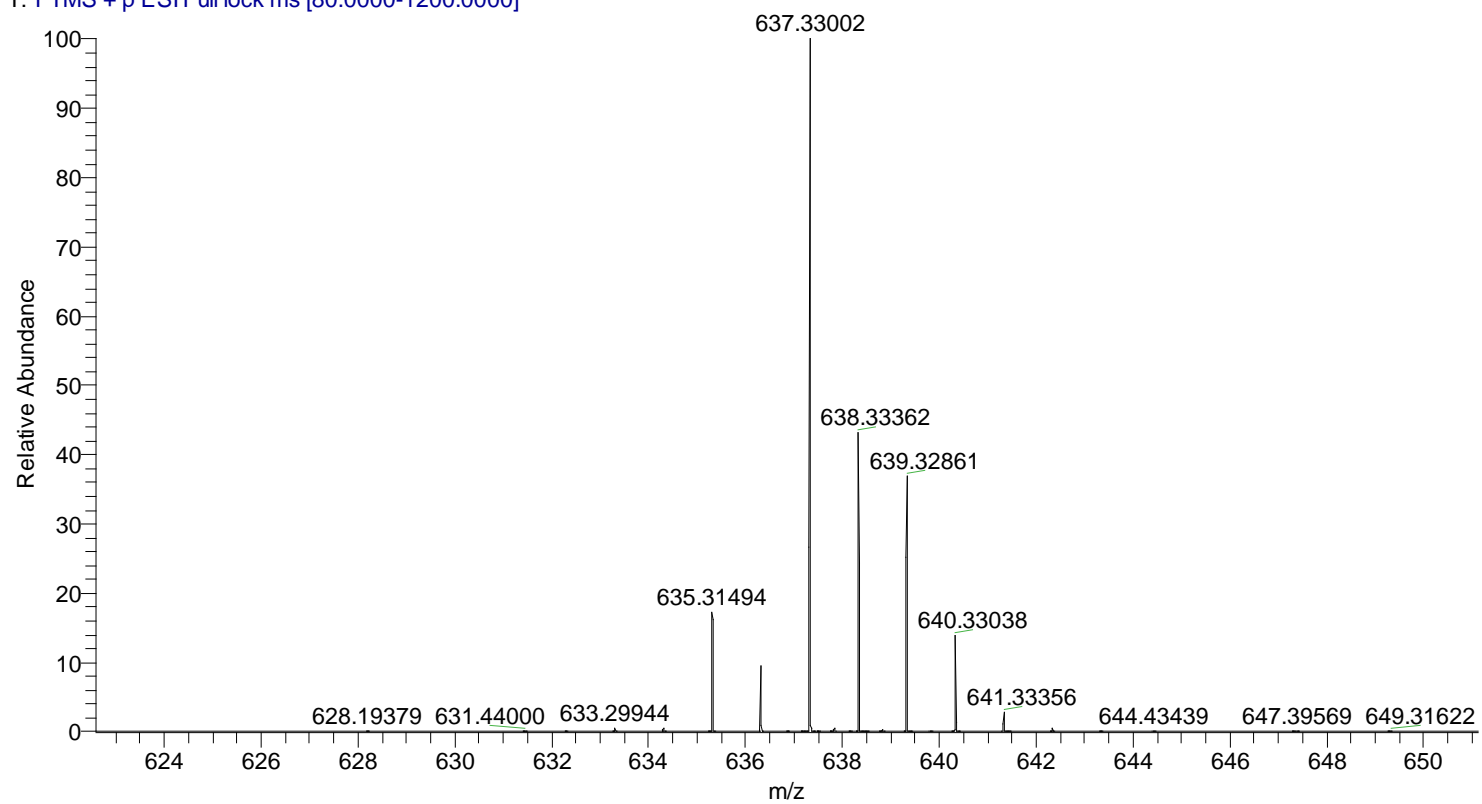

Figure S44. HRMS spectrum of compound TE-I-2.

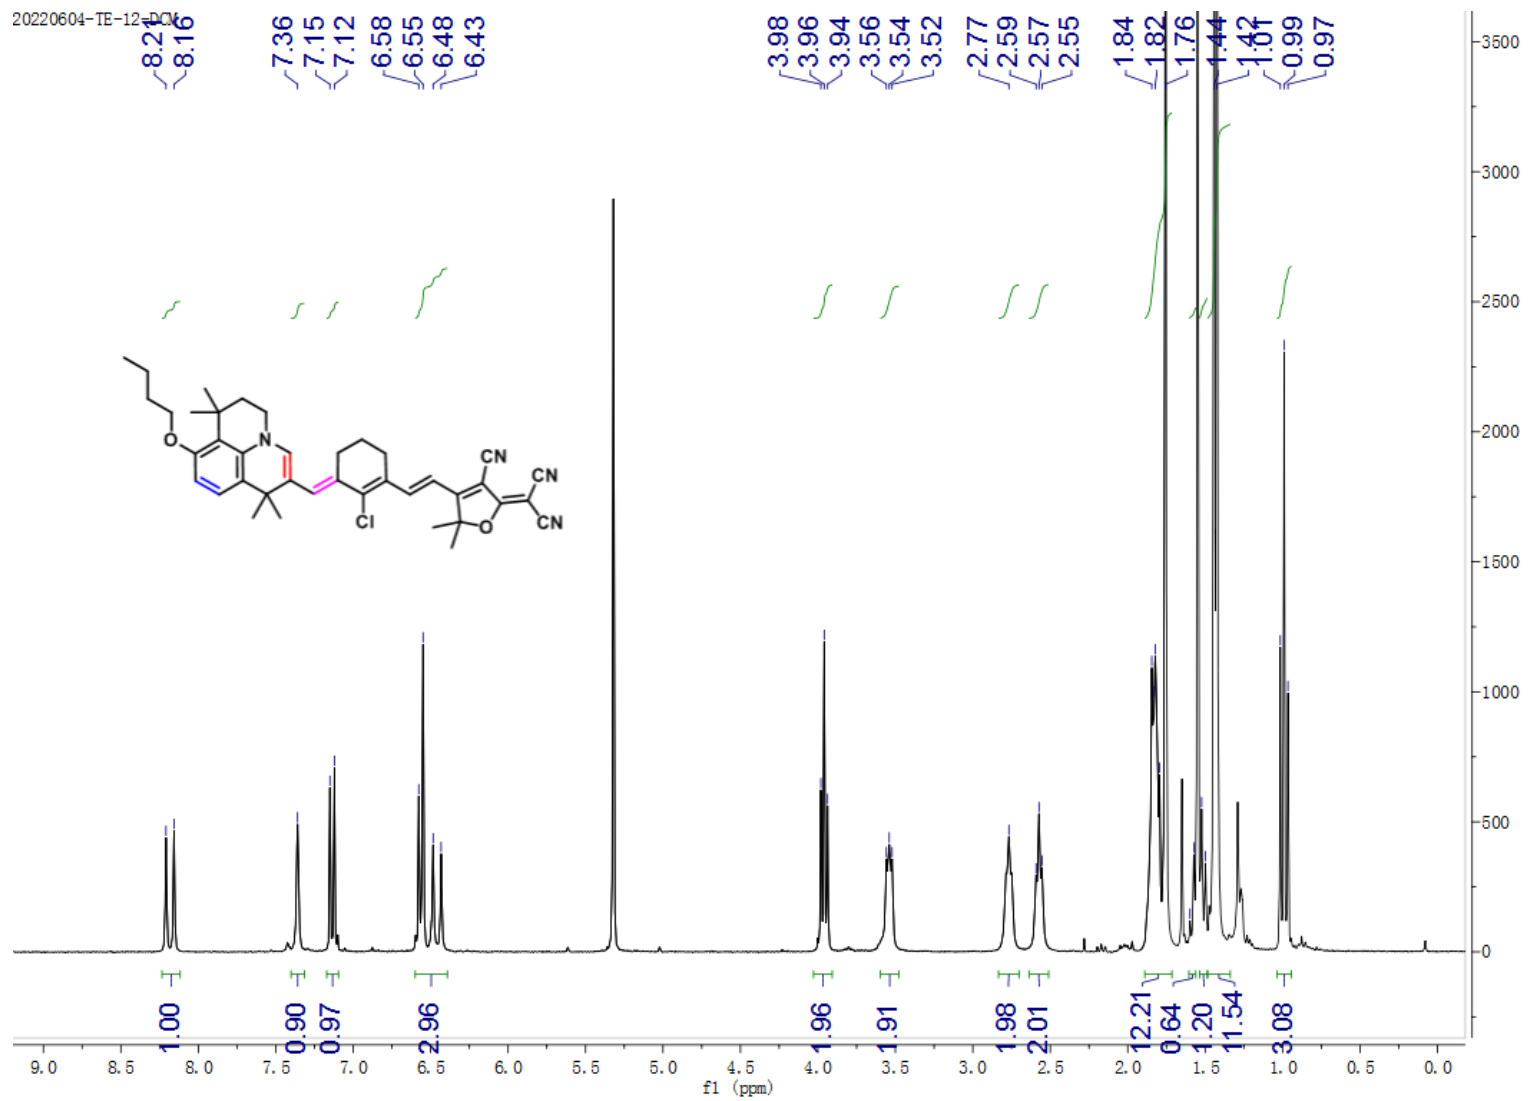

Figure S45.  $^1\text{H}$  NMR spectrum of compound TE-II-2.

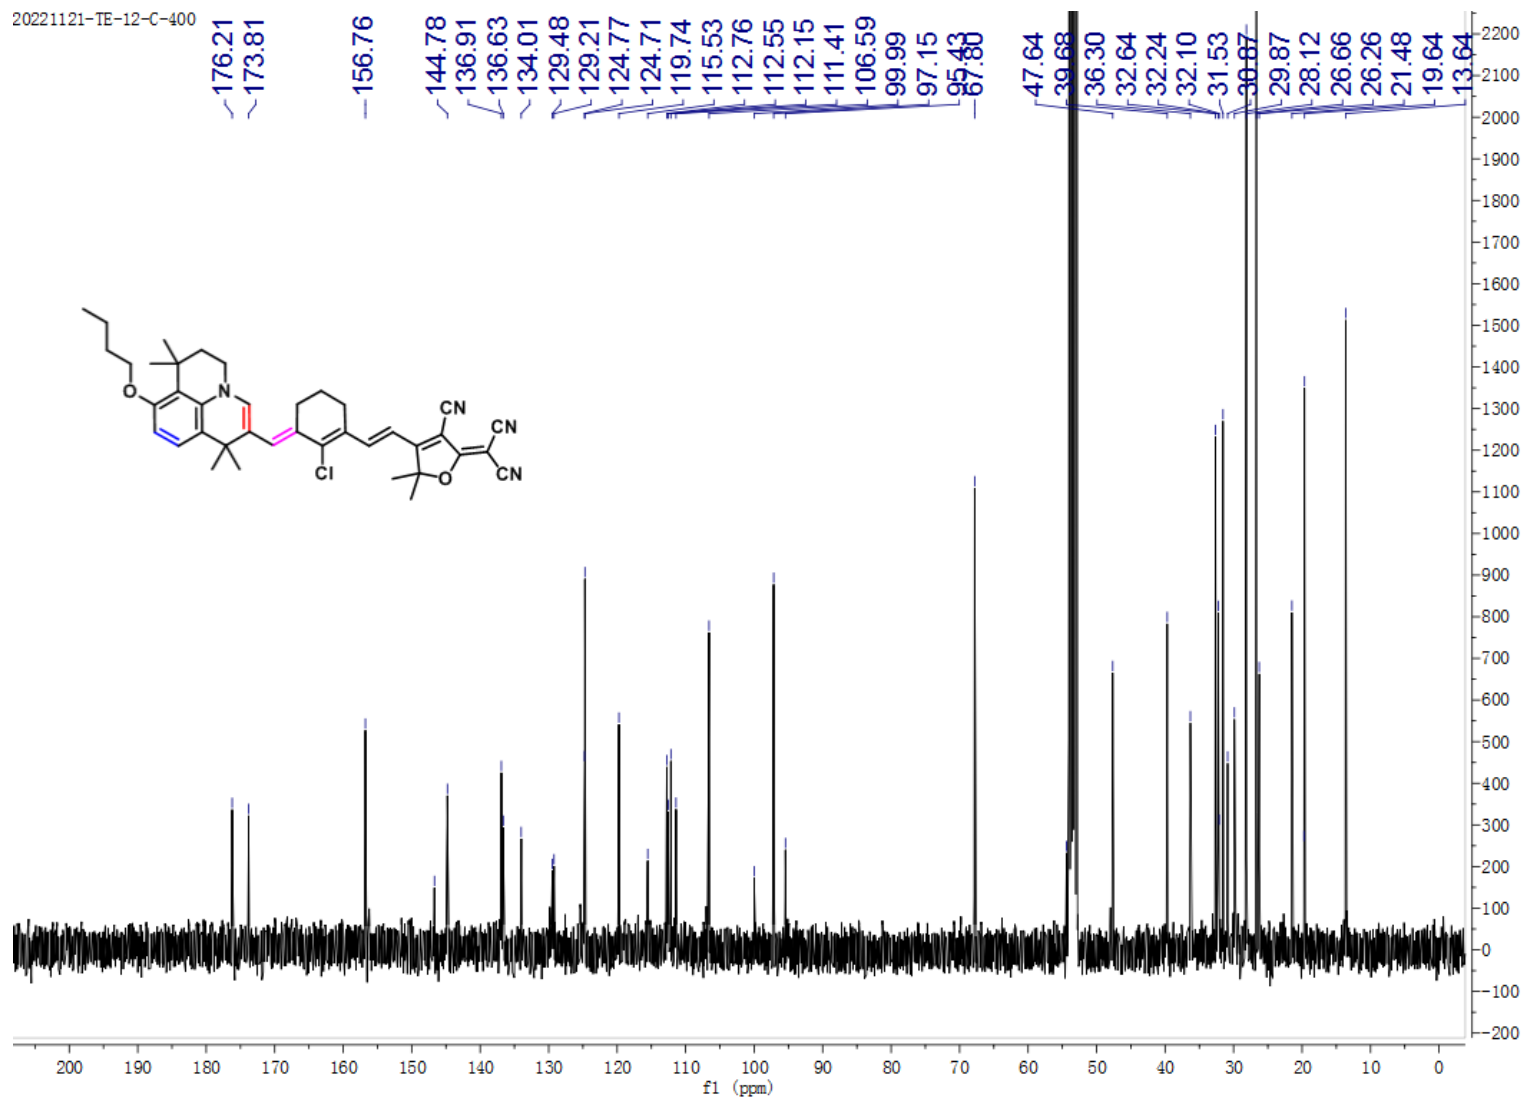

Figure S46.  $^{13}\text{C}$  NMR spectrum of compound TE-II-2.

159-A-TE-12 #16 RT: 0.11 AV: 1 NL: 9.47E6  
T: FTMS + p ESI Full lock ms [80.0000-1200.0000]

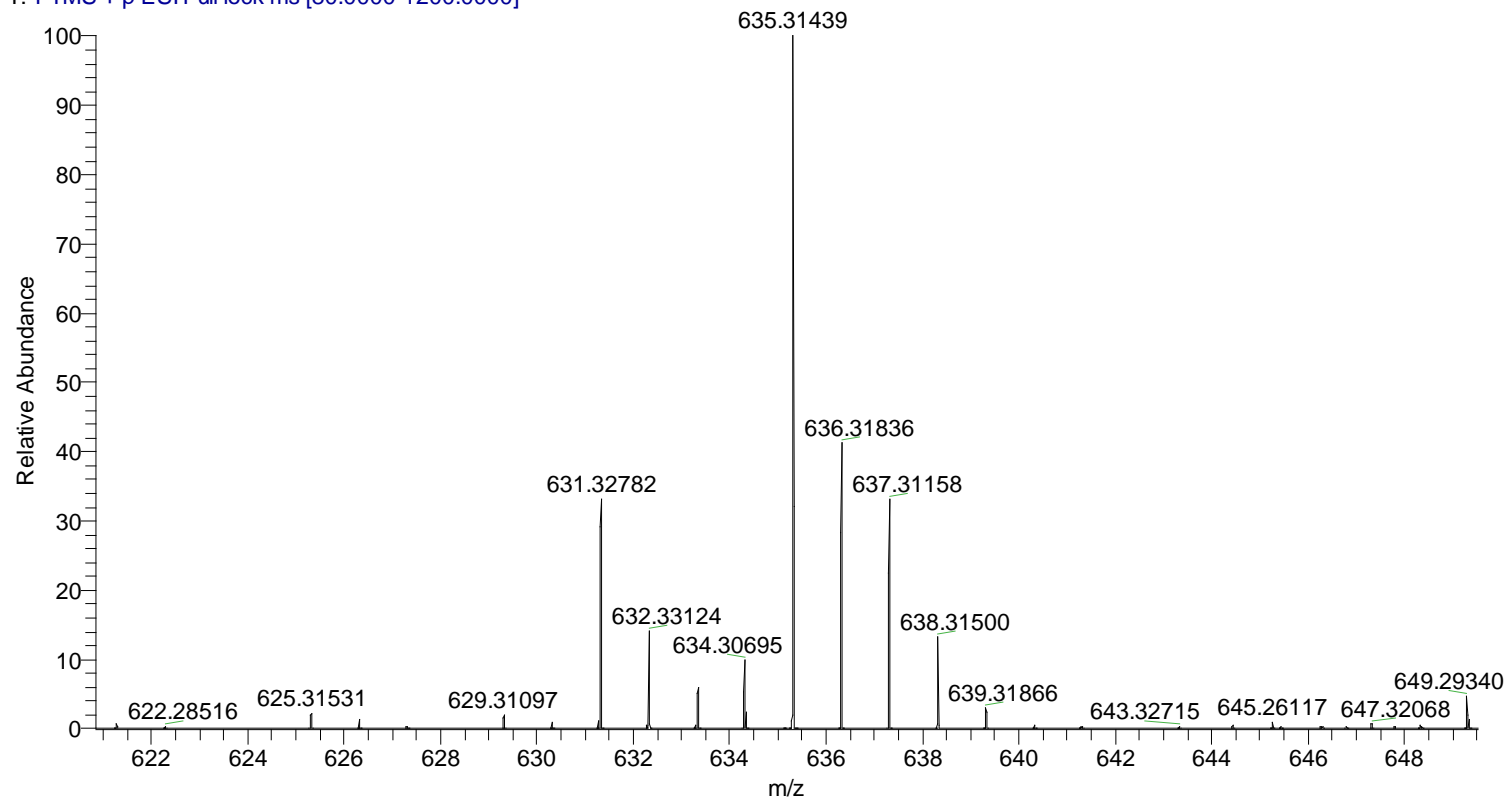

Figure S47. HRMS spectrum of compound **TE-II-2**.

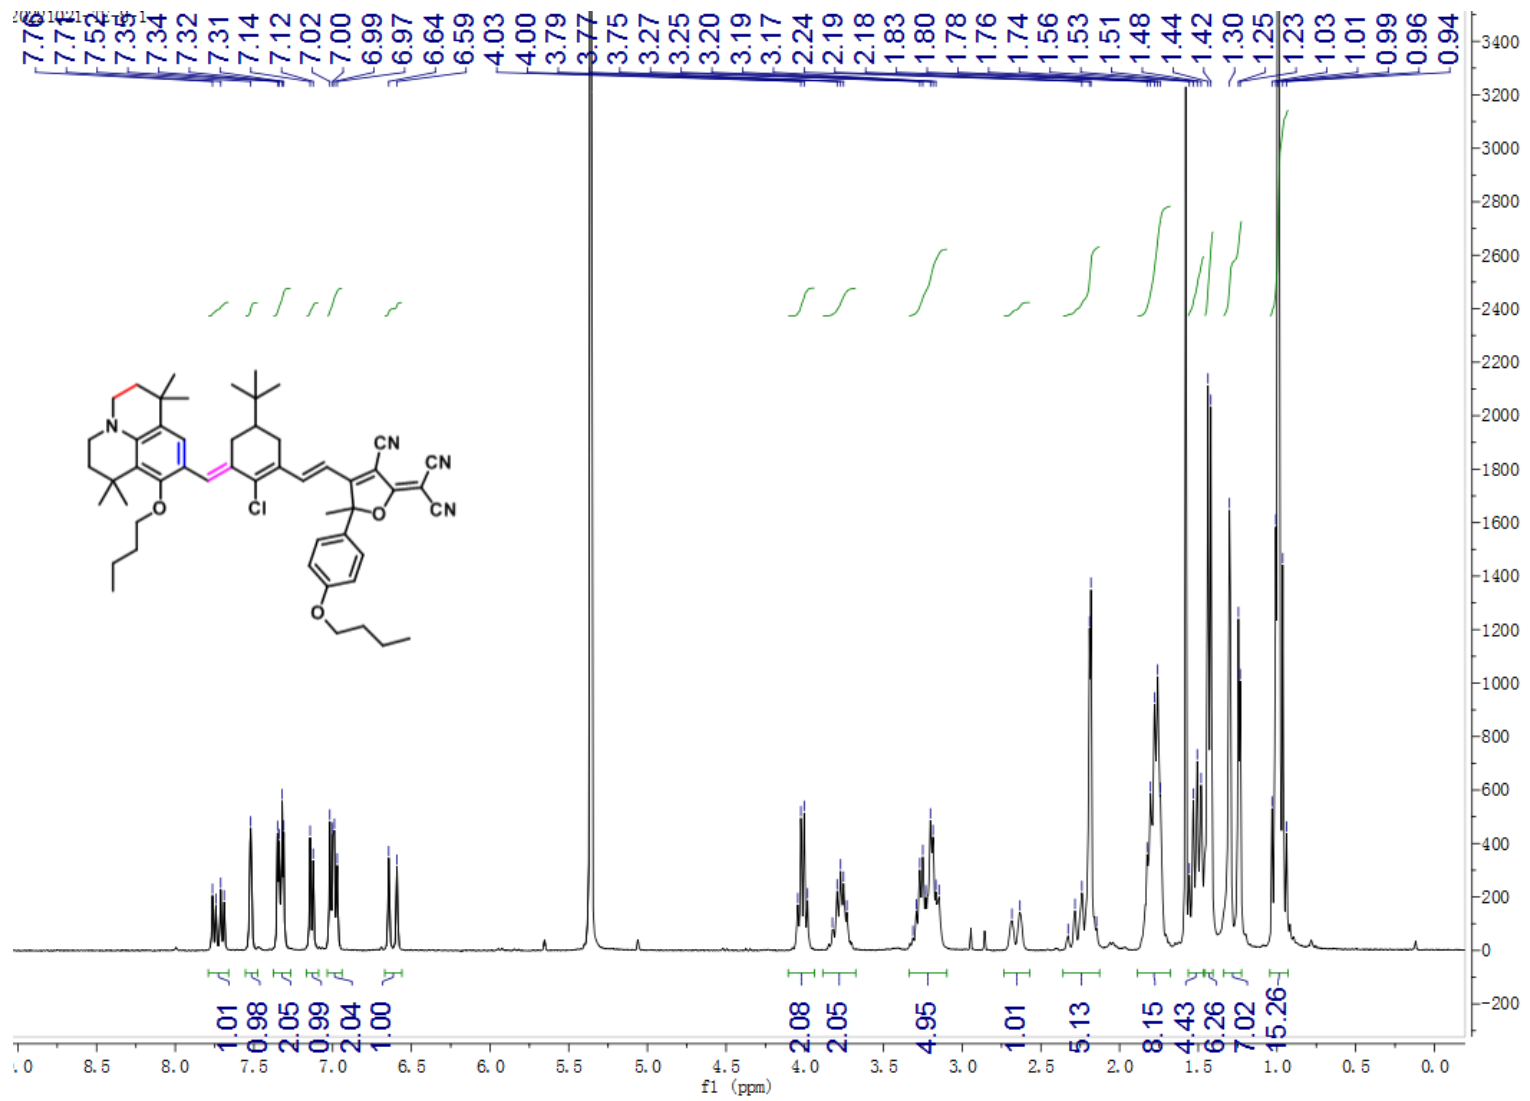

Figure S48. <sup>1</sup>H NMR spectrum of compound TE-I-3.

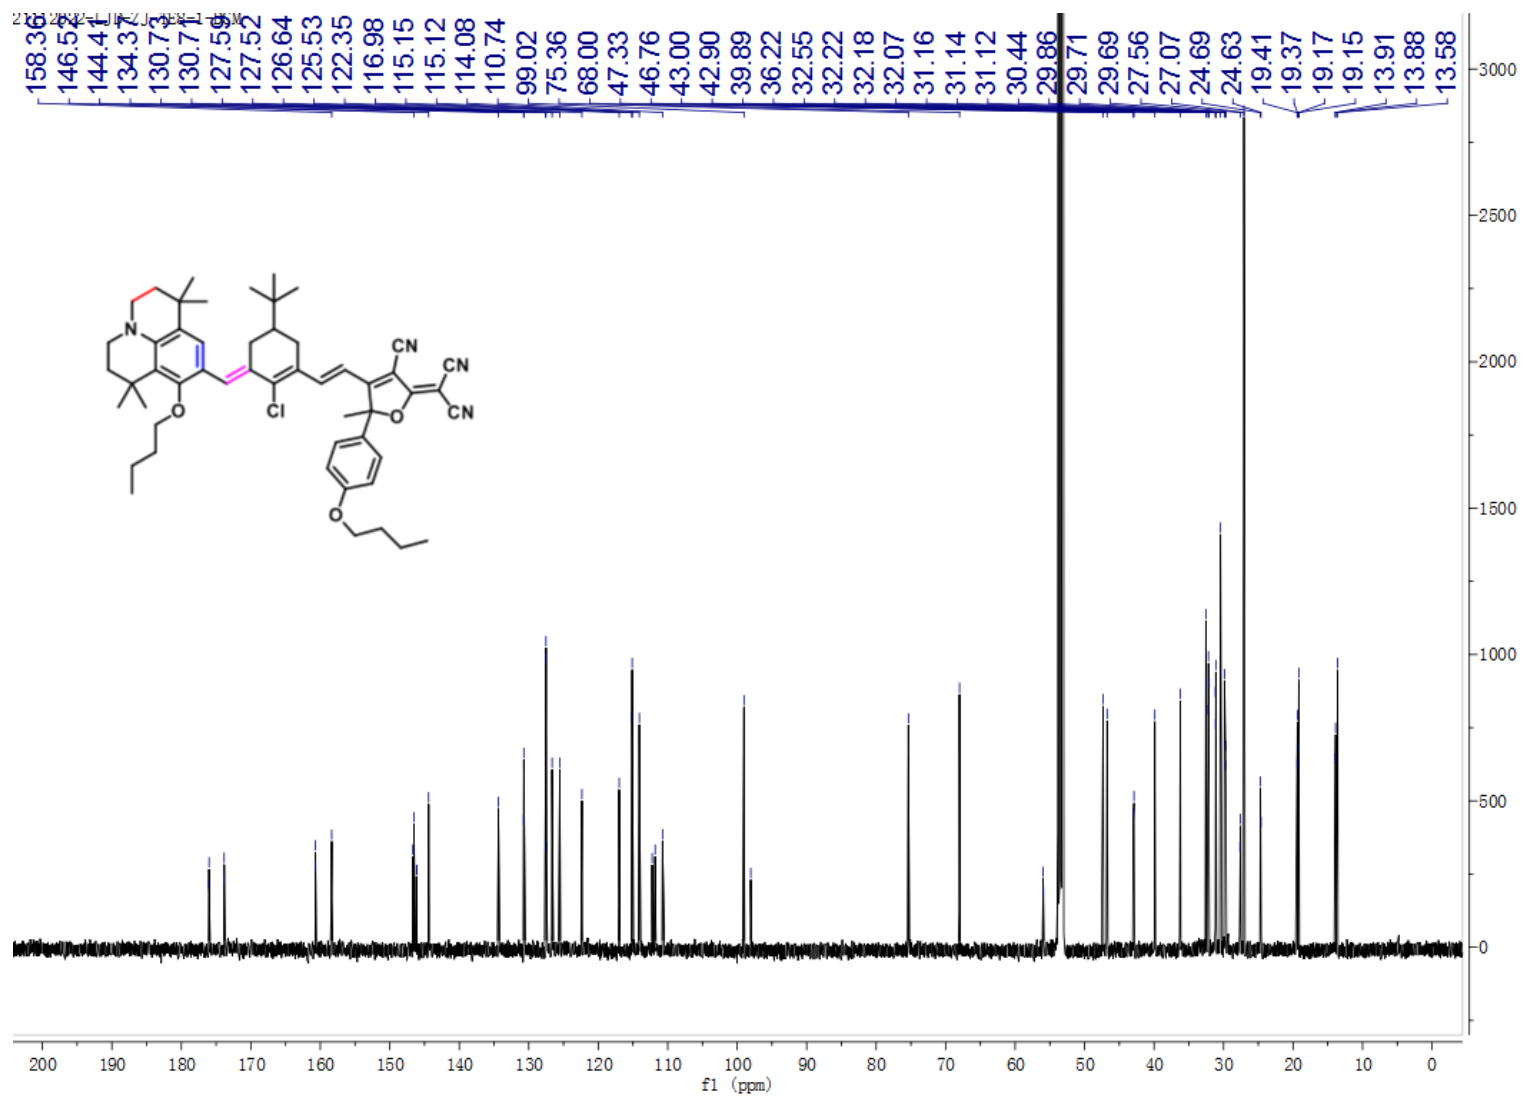

Figure S49. <sup>13</sup>C NMR spectrum of compound TE-I-3.

159-A-TE-8-1 #14 RT: 0.10 AV: 1 NL: 1.59E7  
T: FTMS + p ESI Full lock ms [80.0000-1200.0000]

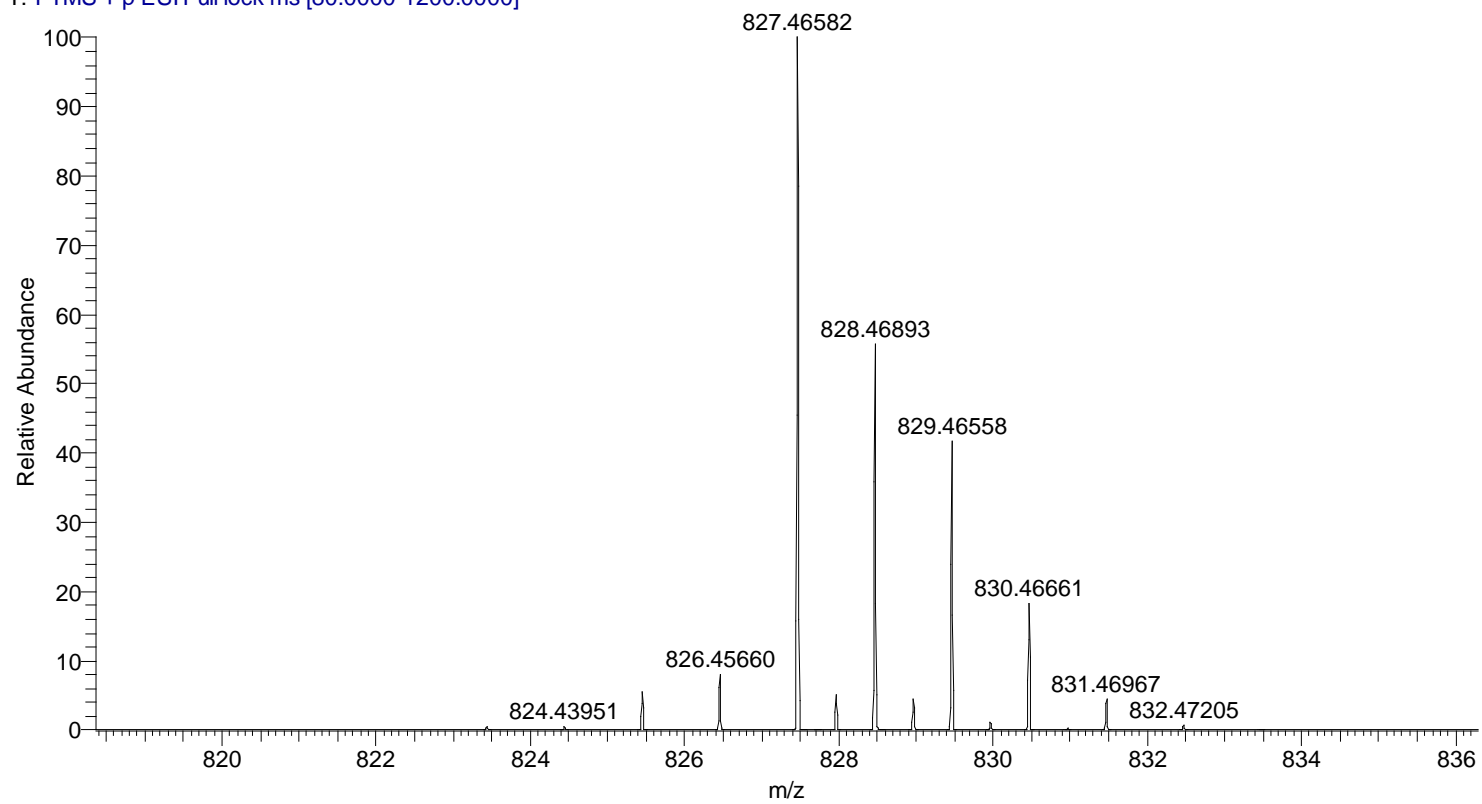

Figure S50. HRMS spectrum of compound TE-I-3.



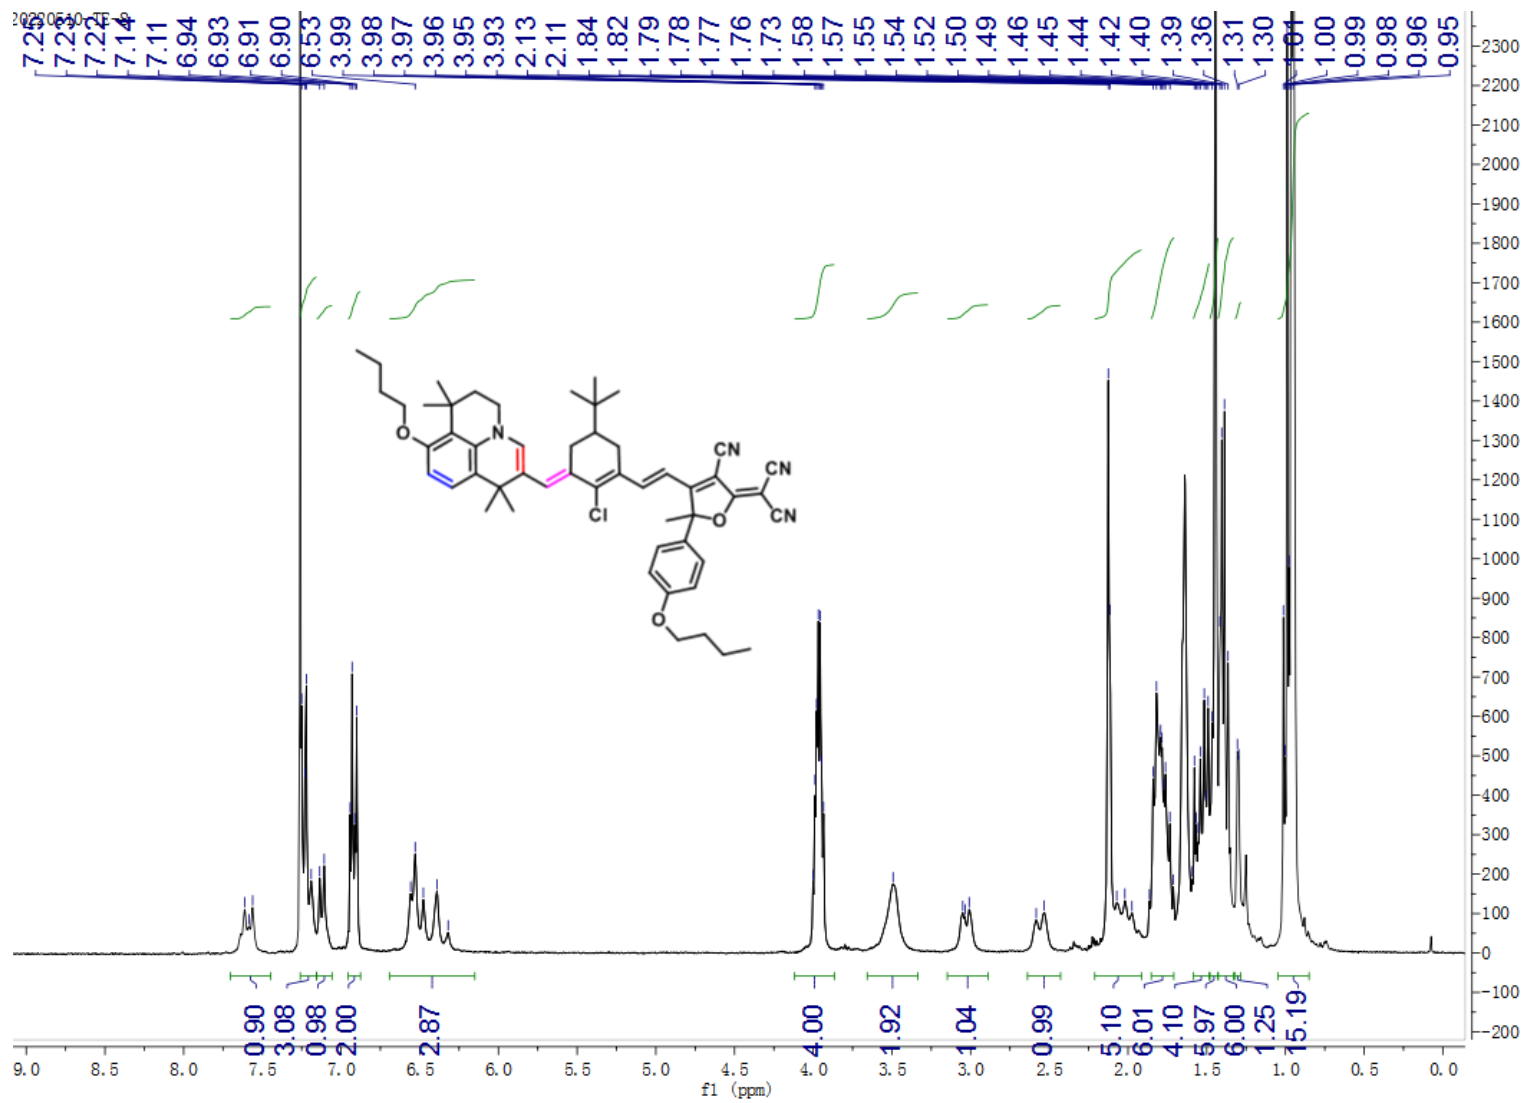

Figure S51.  $^1\text{H}$  NMR spectrum of compound TE-II-3.

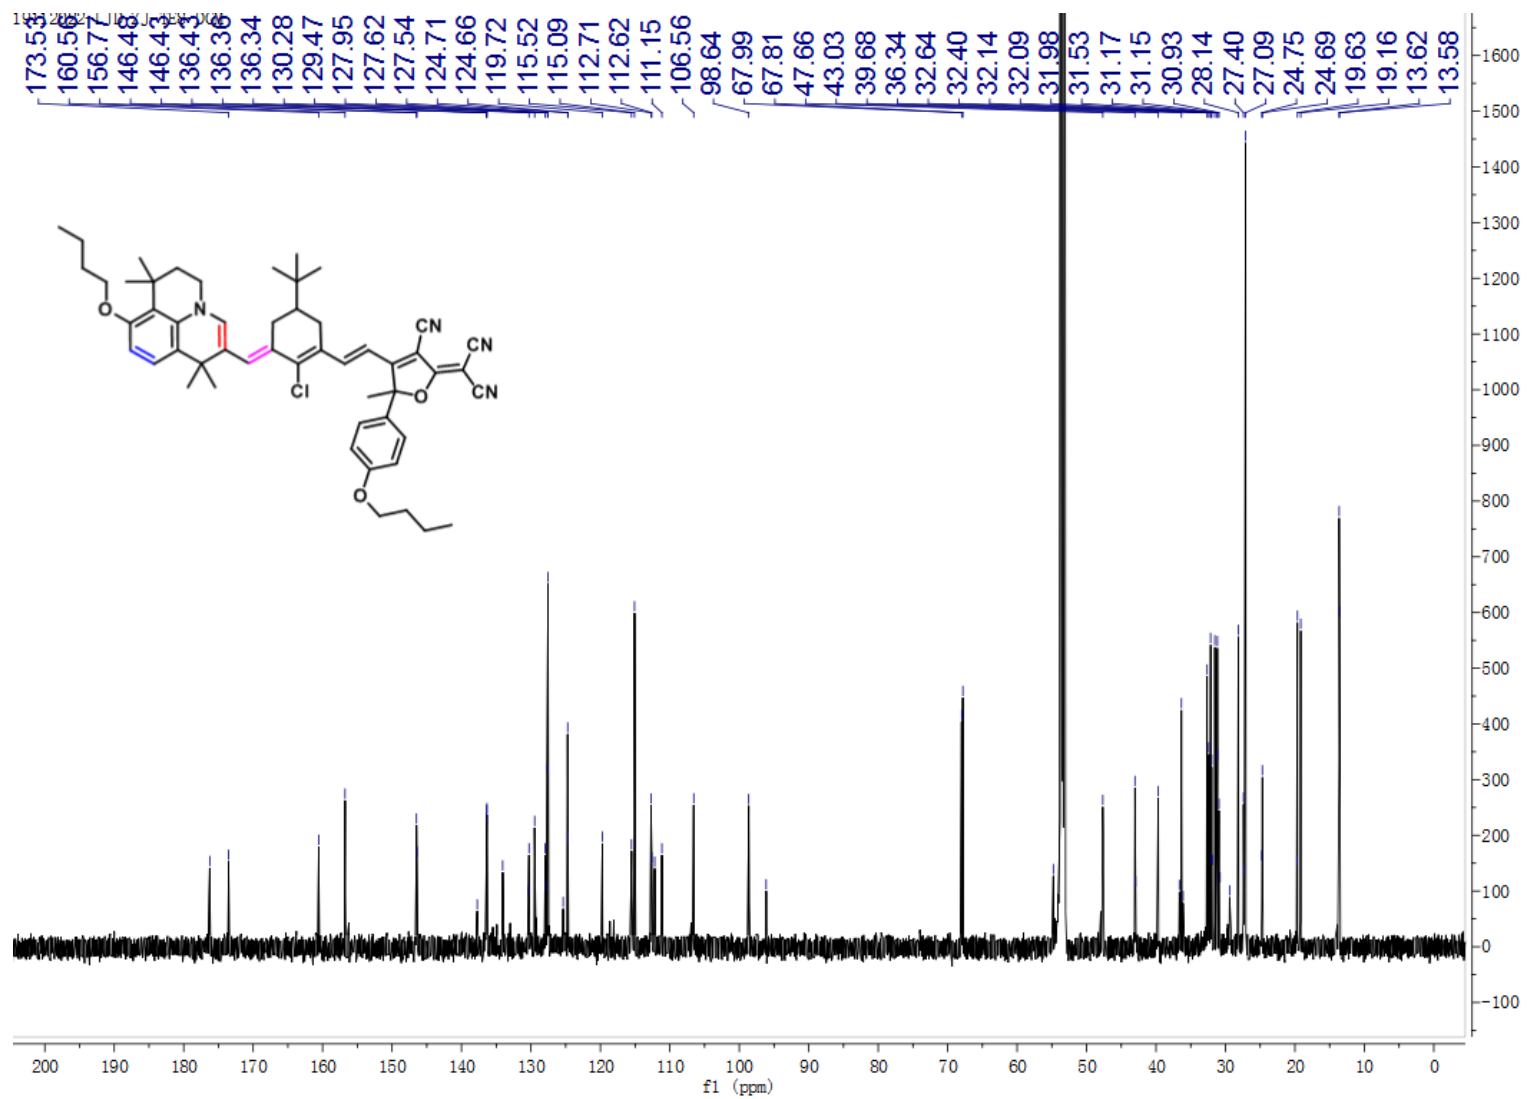

Figure S52. <sup>13</sup>C NMR spectrum of compound TE-II-3.

159-A-TE-8 #15 RT: 0.10 AV: 1 NL: 4.45E6  
T: FTMS + p ESI Full lock ms [80.0000-1200.0000]

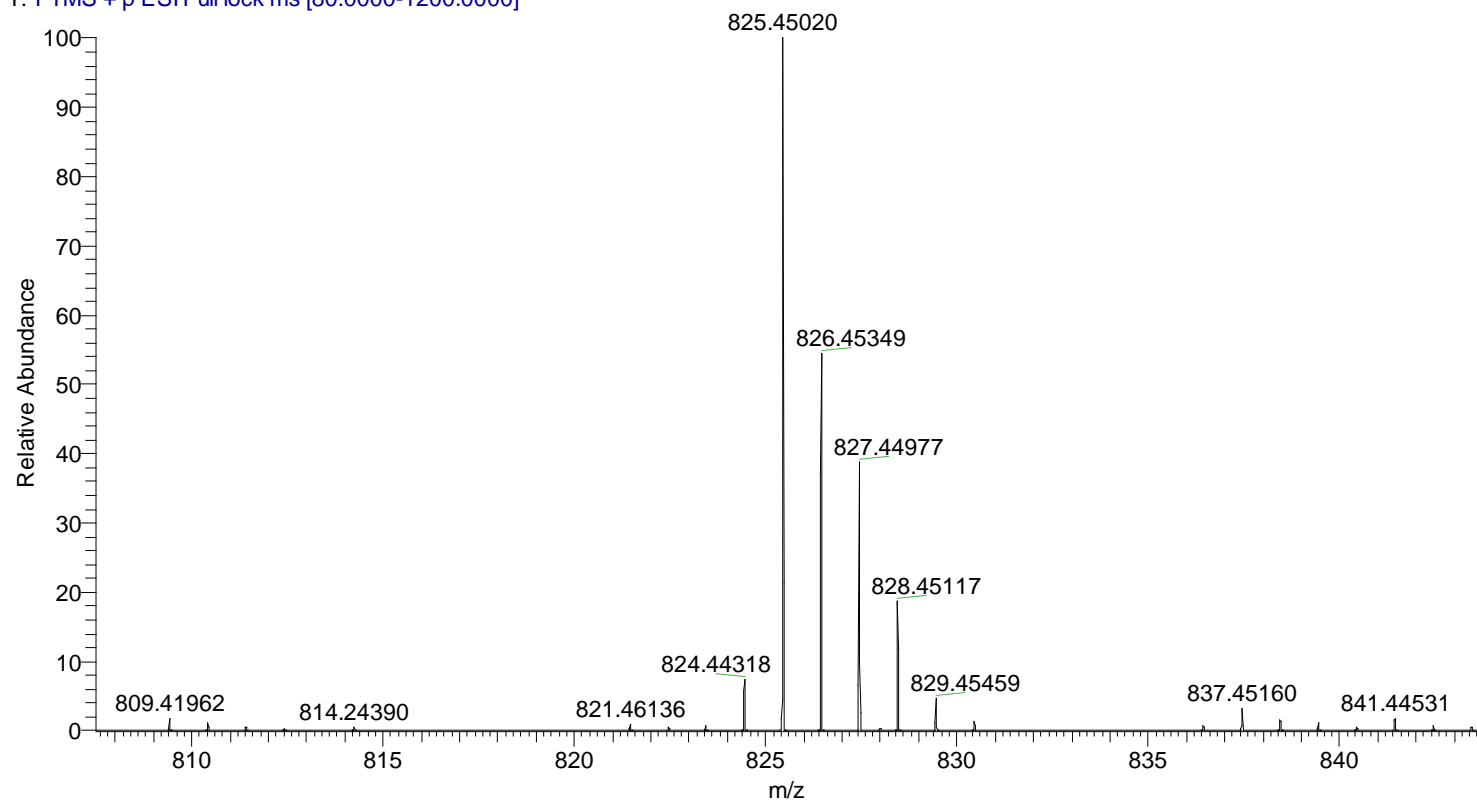

Figure S53. HRMS spectrum of compound **TE-II-3**.

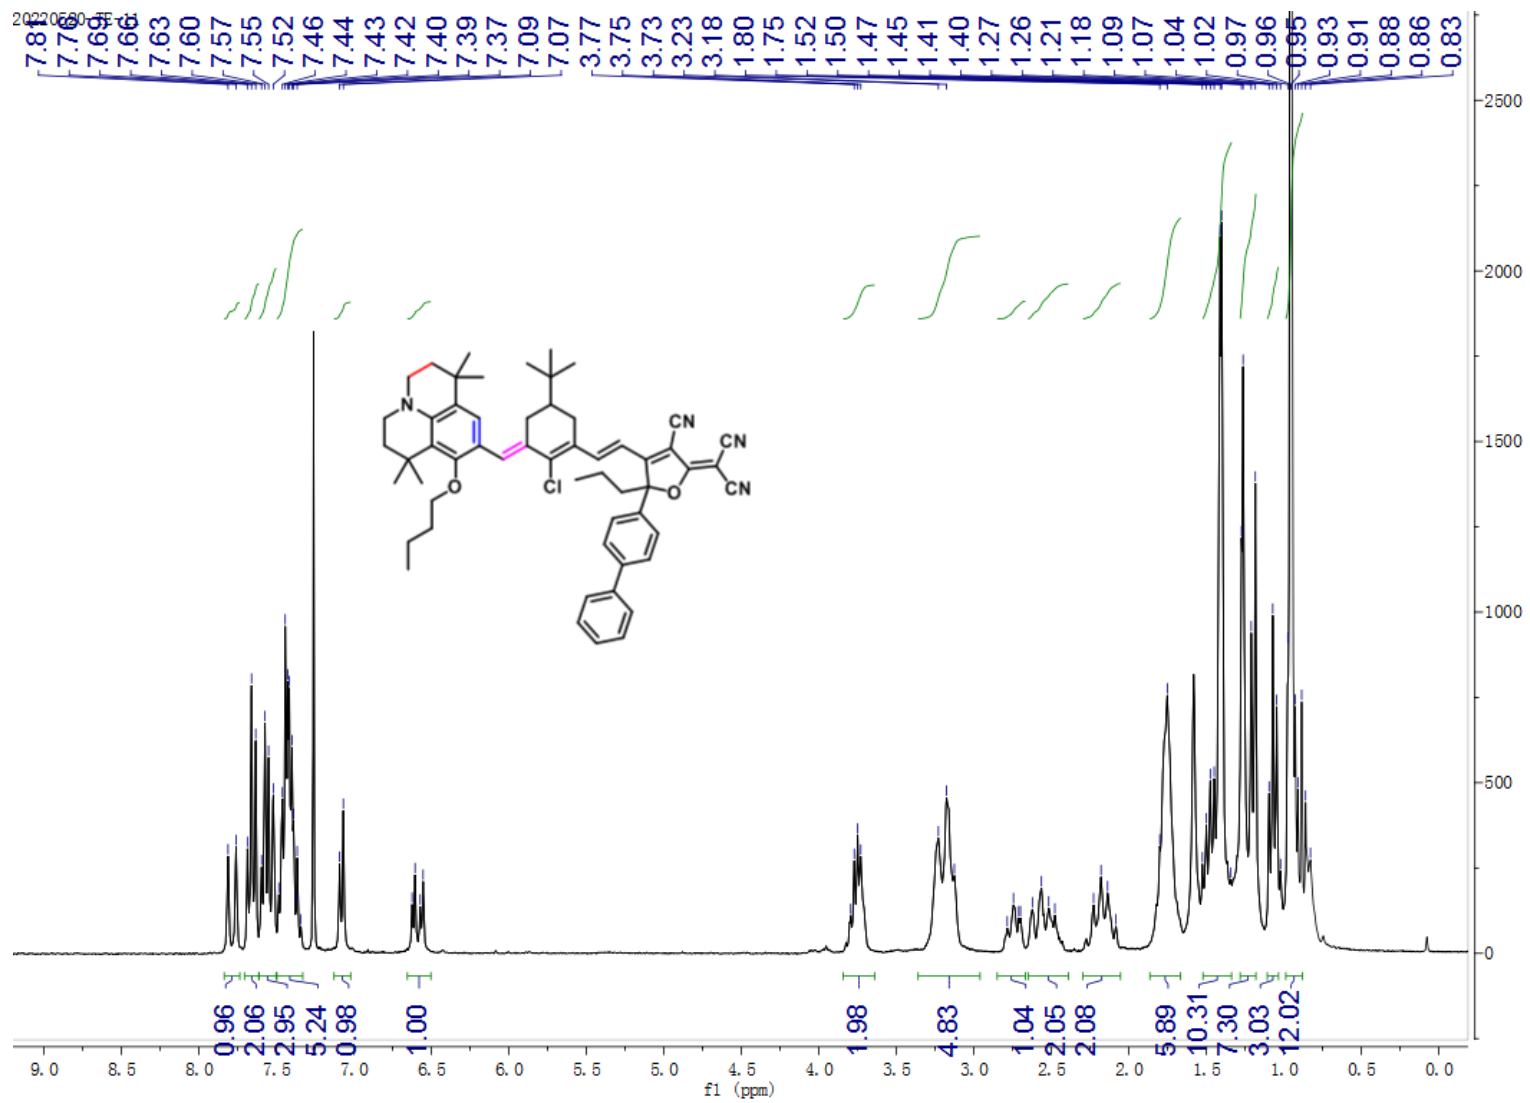

Figure S54.  $^1\text{H}$  NMR spectrum of compound TE-I-4.

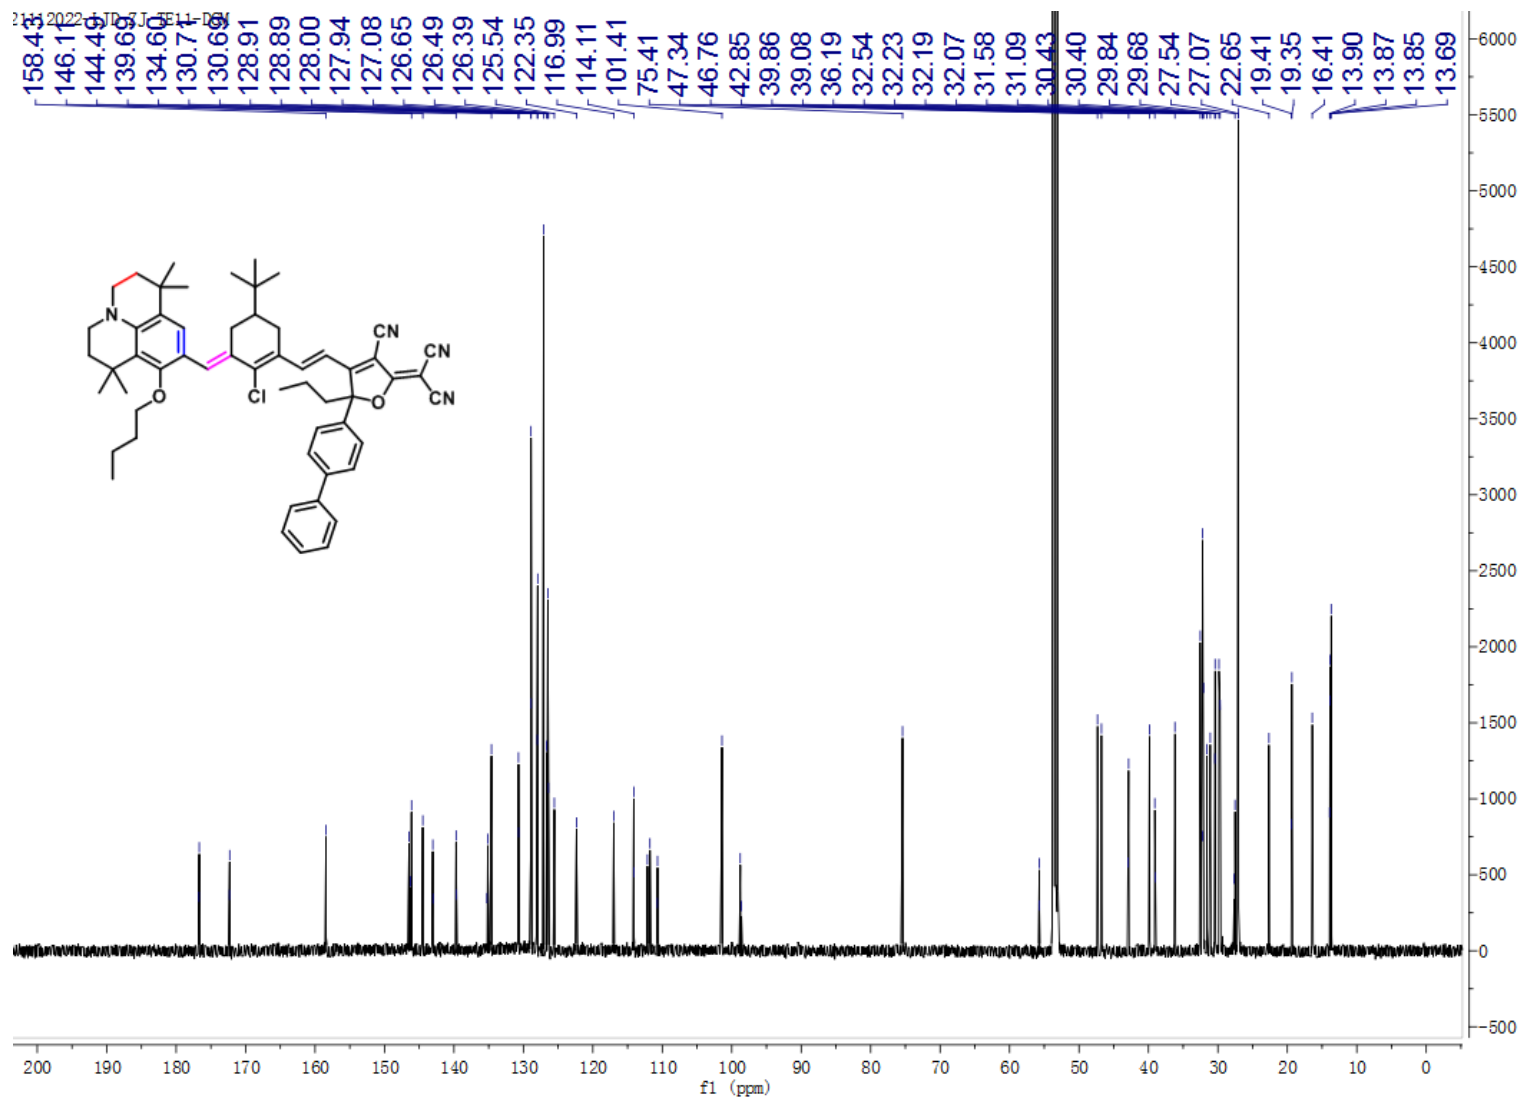

Figure S55. <sup>13</sup>C NMR spectrum of compound TE-I-4.

159-A-TE-11 #15 RT: 0.10 AV: 1 NL: 8.62E6  
T: FTMS + p ESI Full lock ms [80.0000-1200.0000]

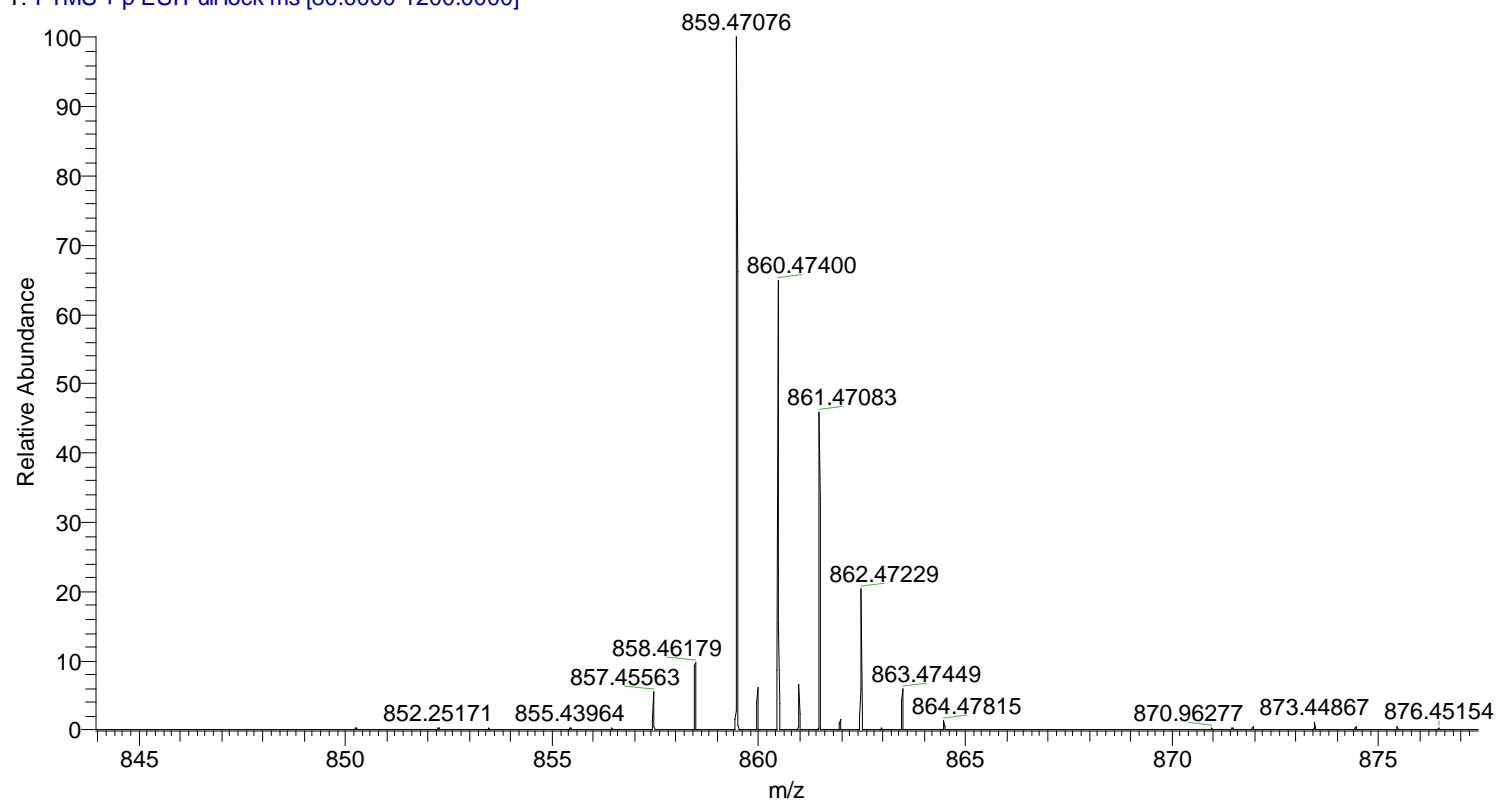

Figure S56. HRMS spectrum of compound TE-I-4.

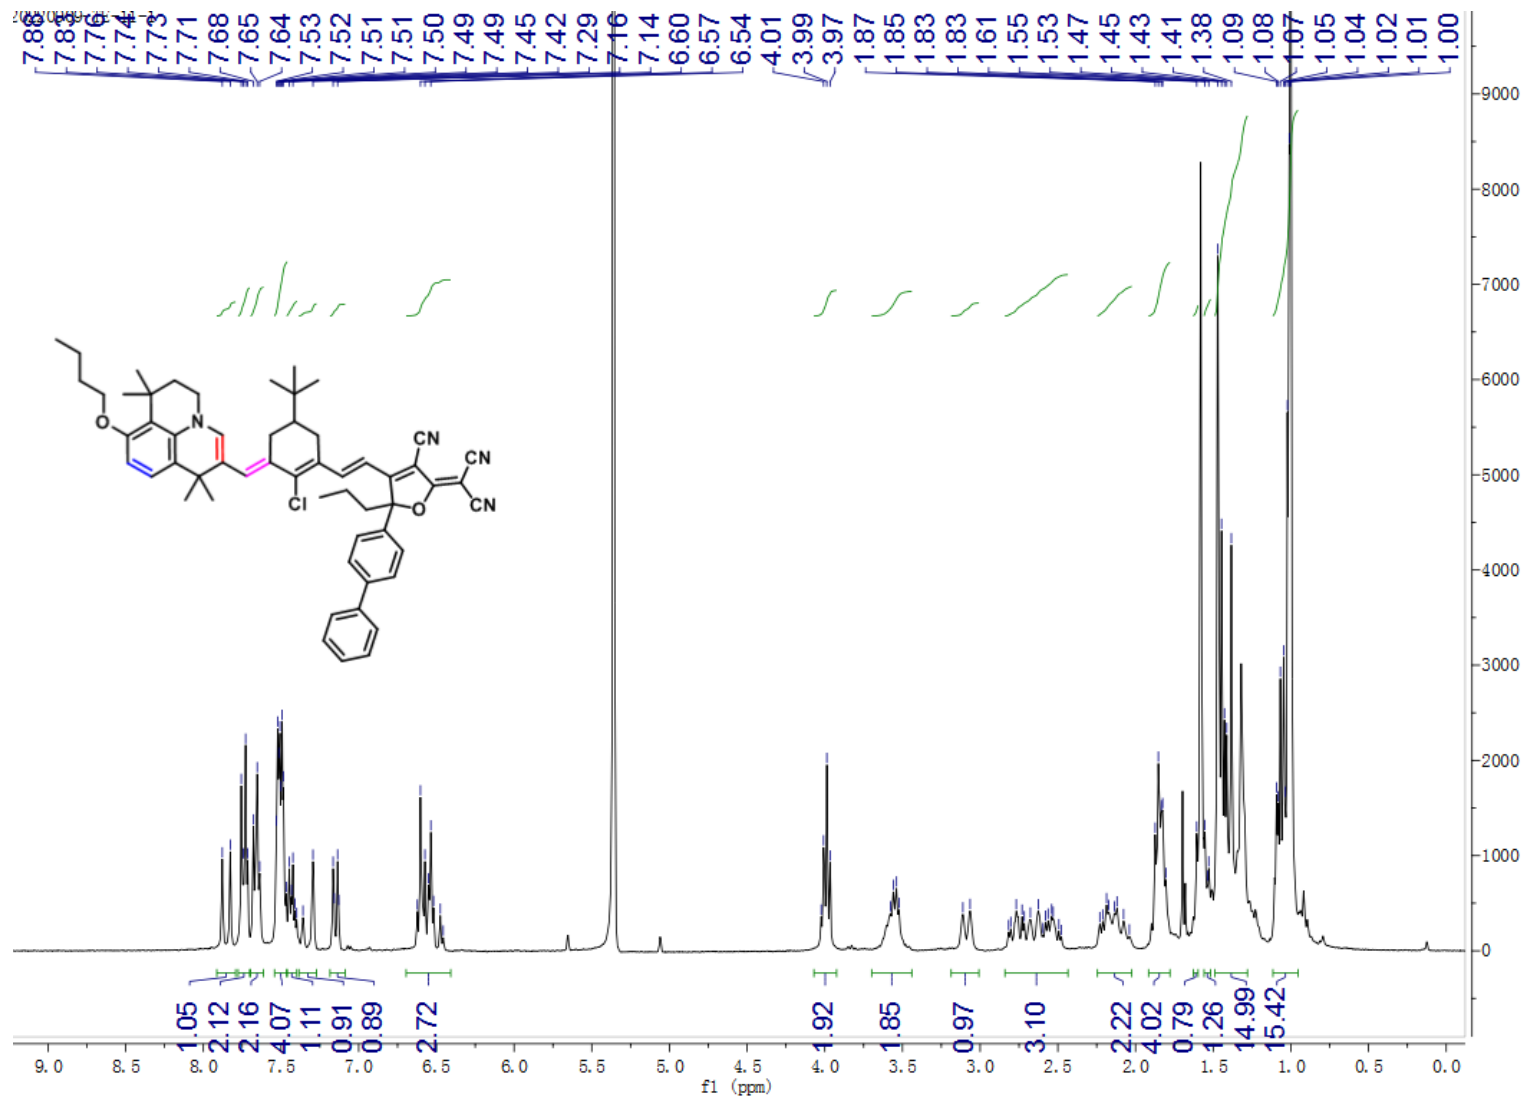

Figure S57.  $^1\text{H}$  NMR spectrum of compound TE-II-4.

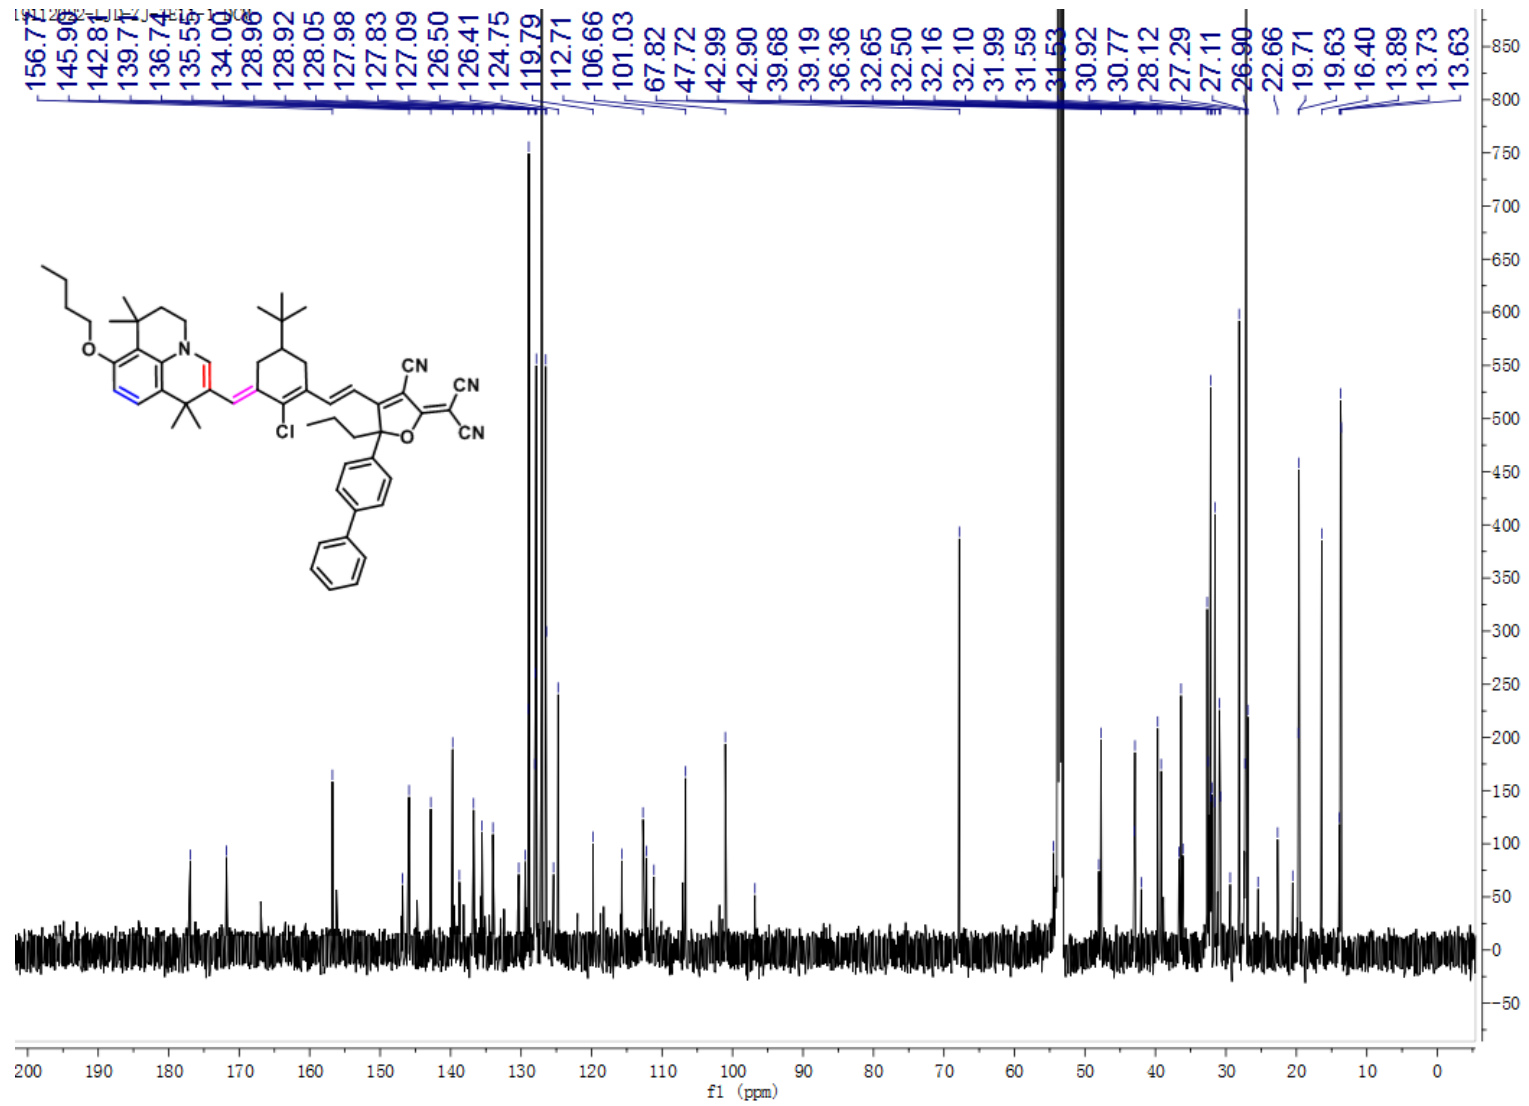

Figure S58.  $^{13}\text{C}$  NMR spectrum of compound TE-II-4.



159-A-TE-11-1 #14 RT: 0.10 AV: 1 NL: 3.69E6  
T: FTMS + p ESI Full lock ms [80.0000-1200.0000]

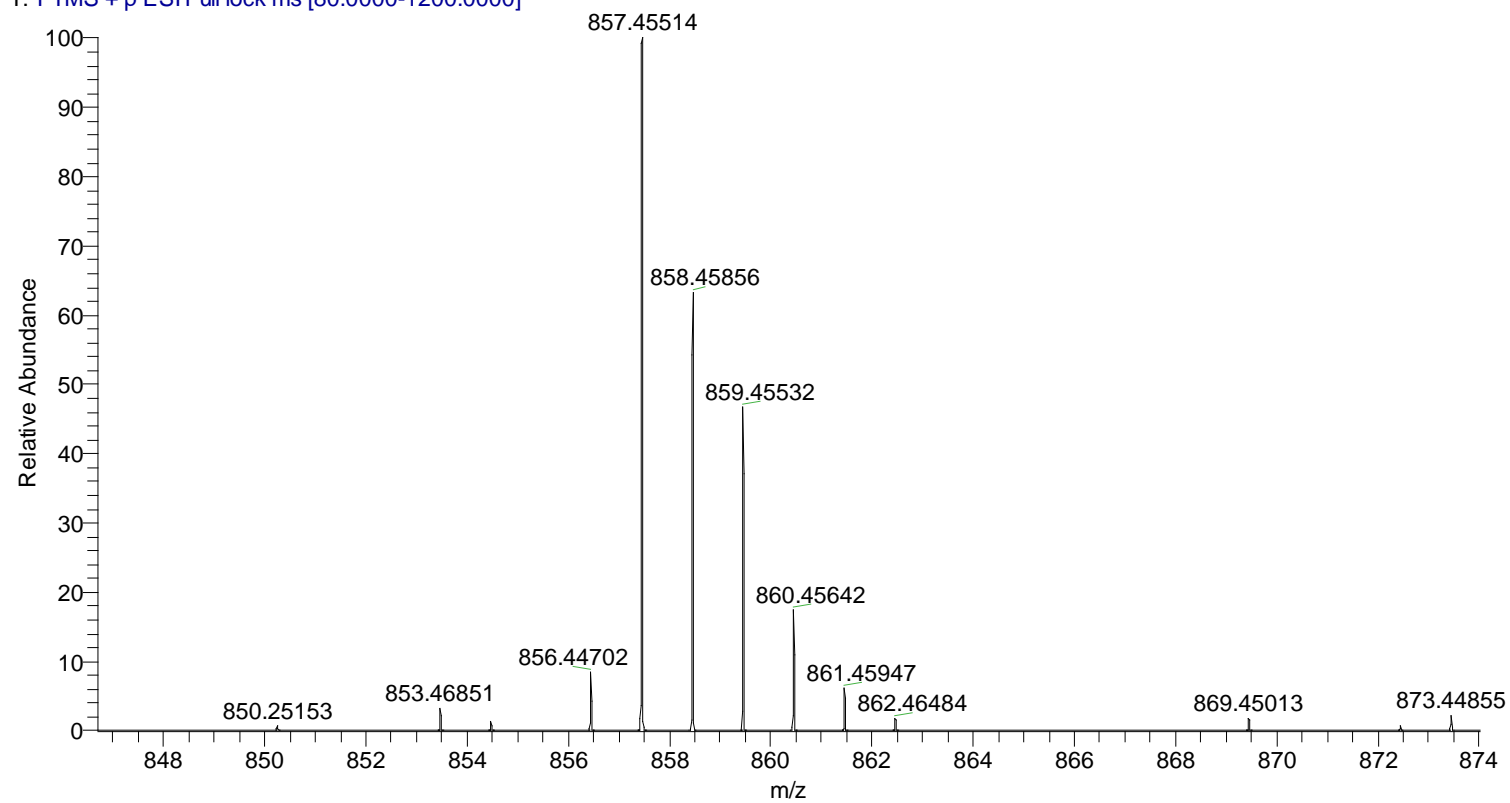

Figure S59. HRMS spectrum of compound **TE-II-4**.

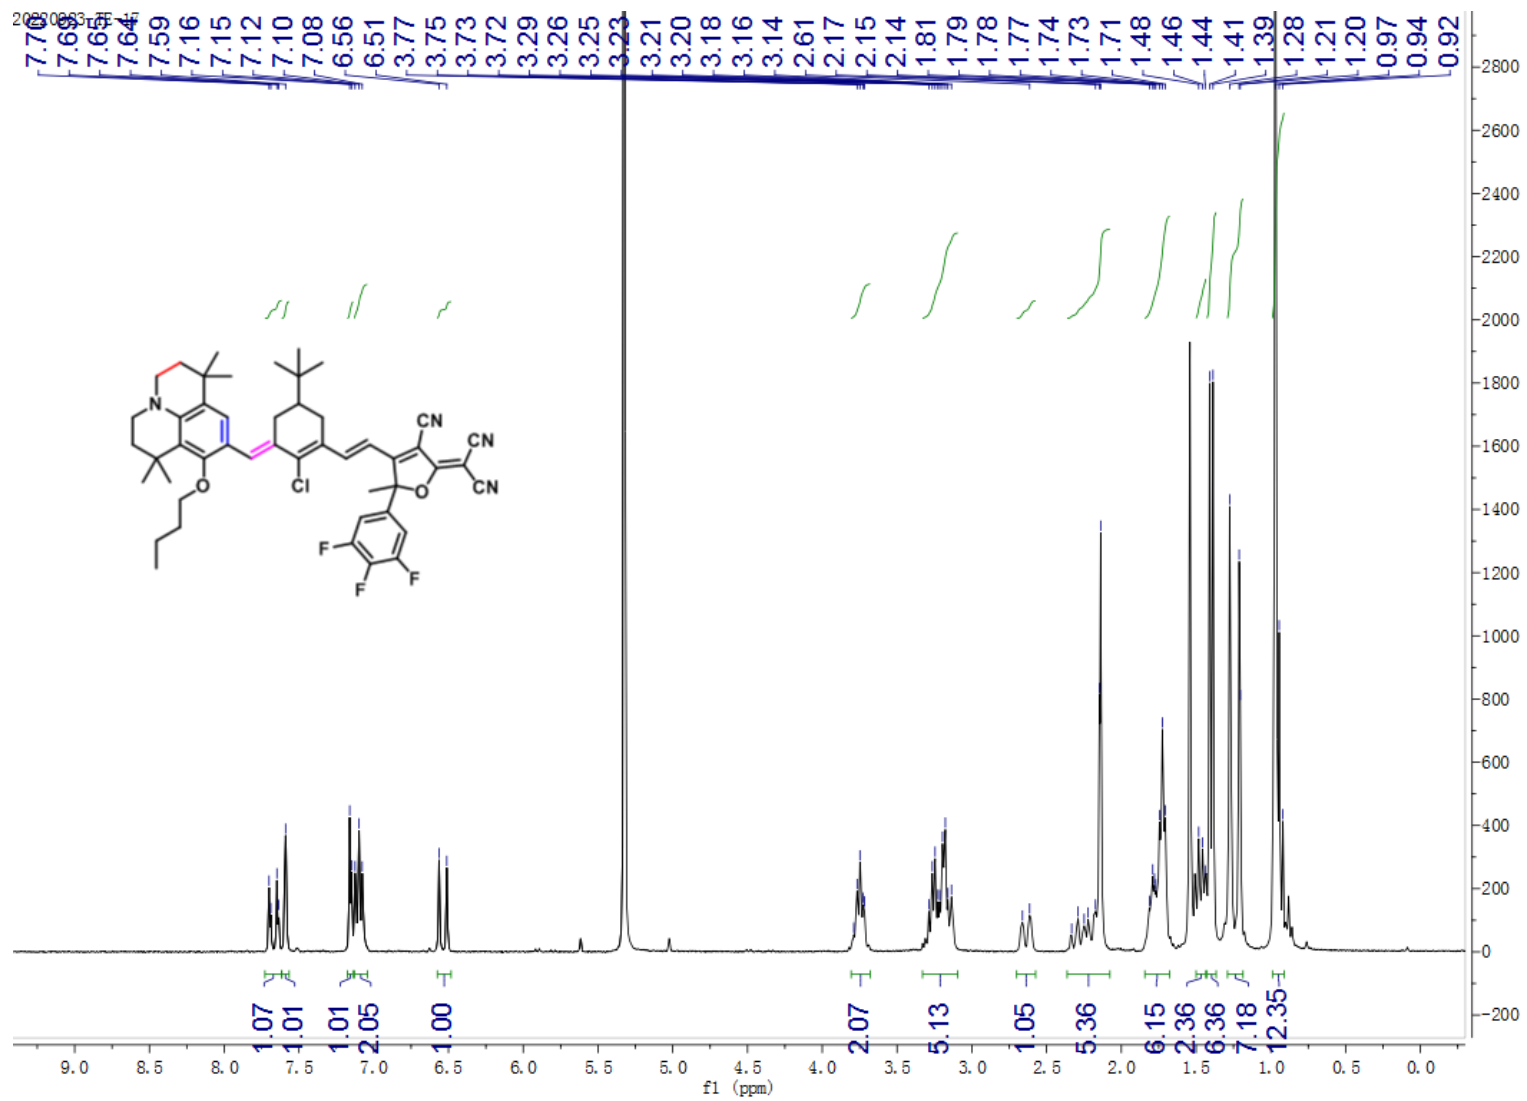

Figure S60. <sup>1</sup>H NMR spectrum of compound TE-I-5.

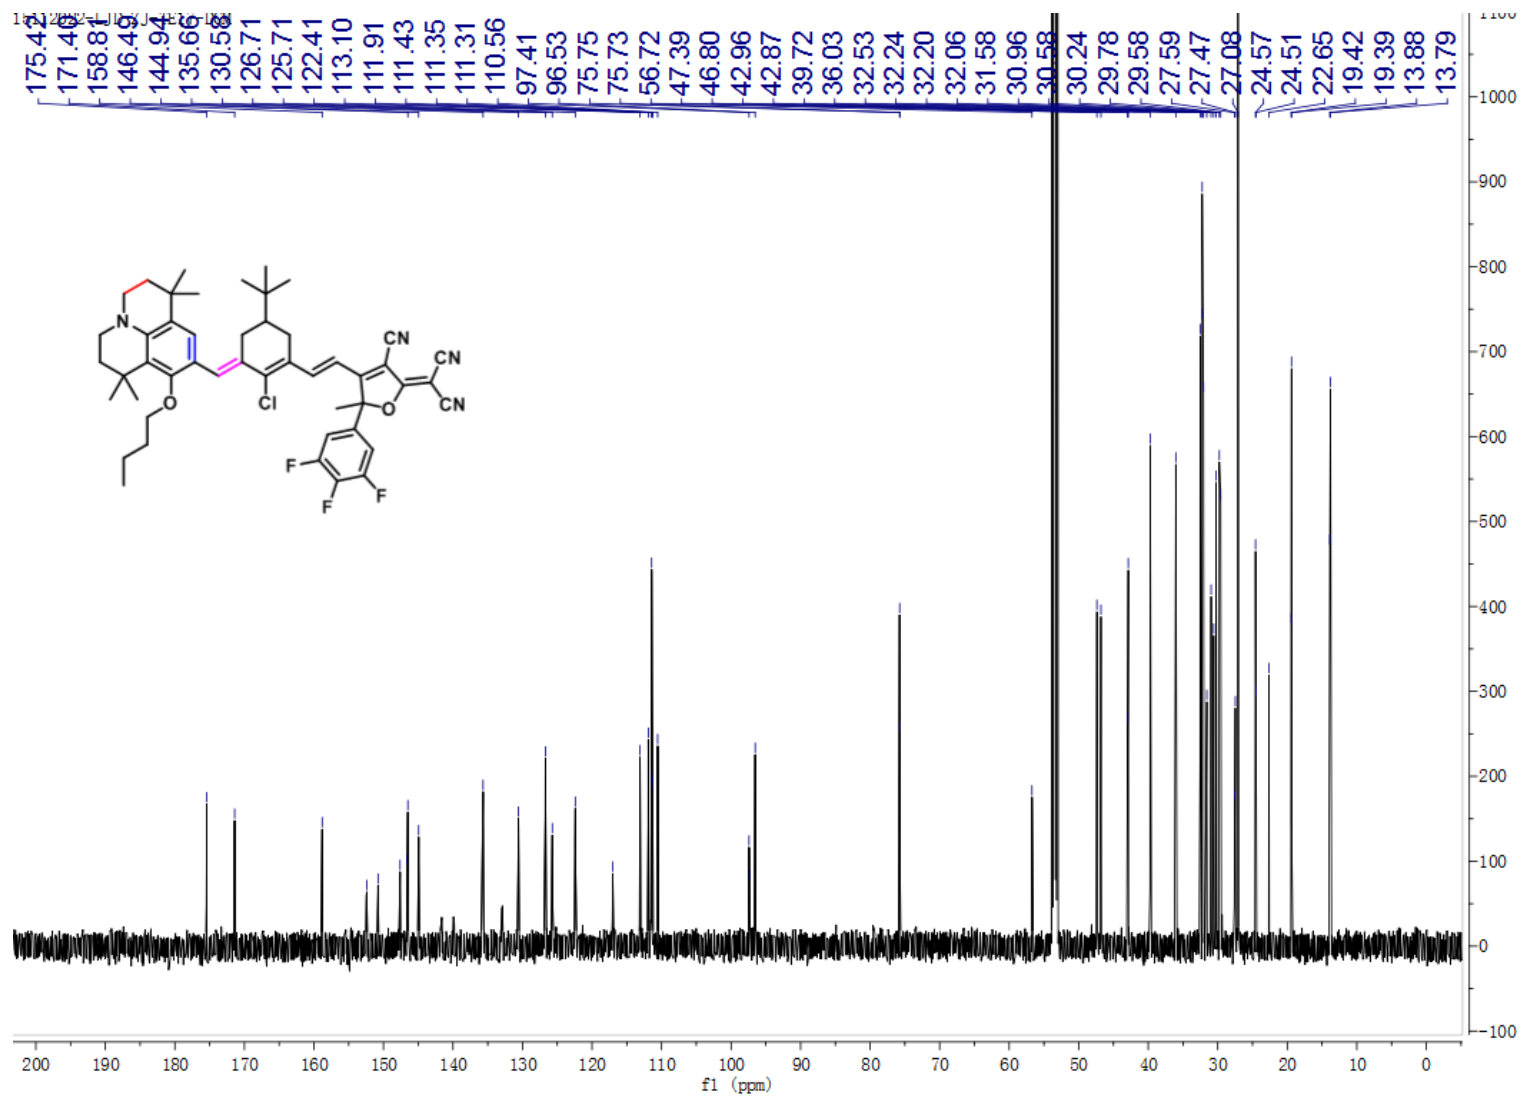

Figure S61. <sup>13</sup>C NMR spectrum of compound TE-I-5.

159-A-TE-17 #15 RT: 0.10 AV: 1 NL: 1.28E7  
T: FTMS + p ESI Full lock ms [80.0000-1200.0000]

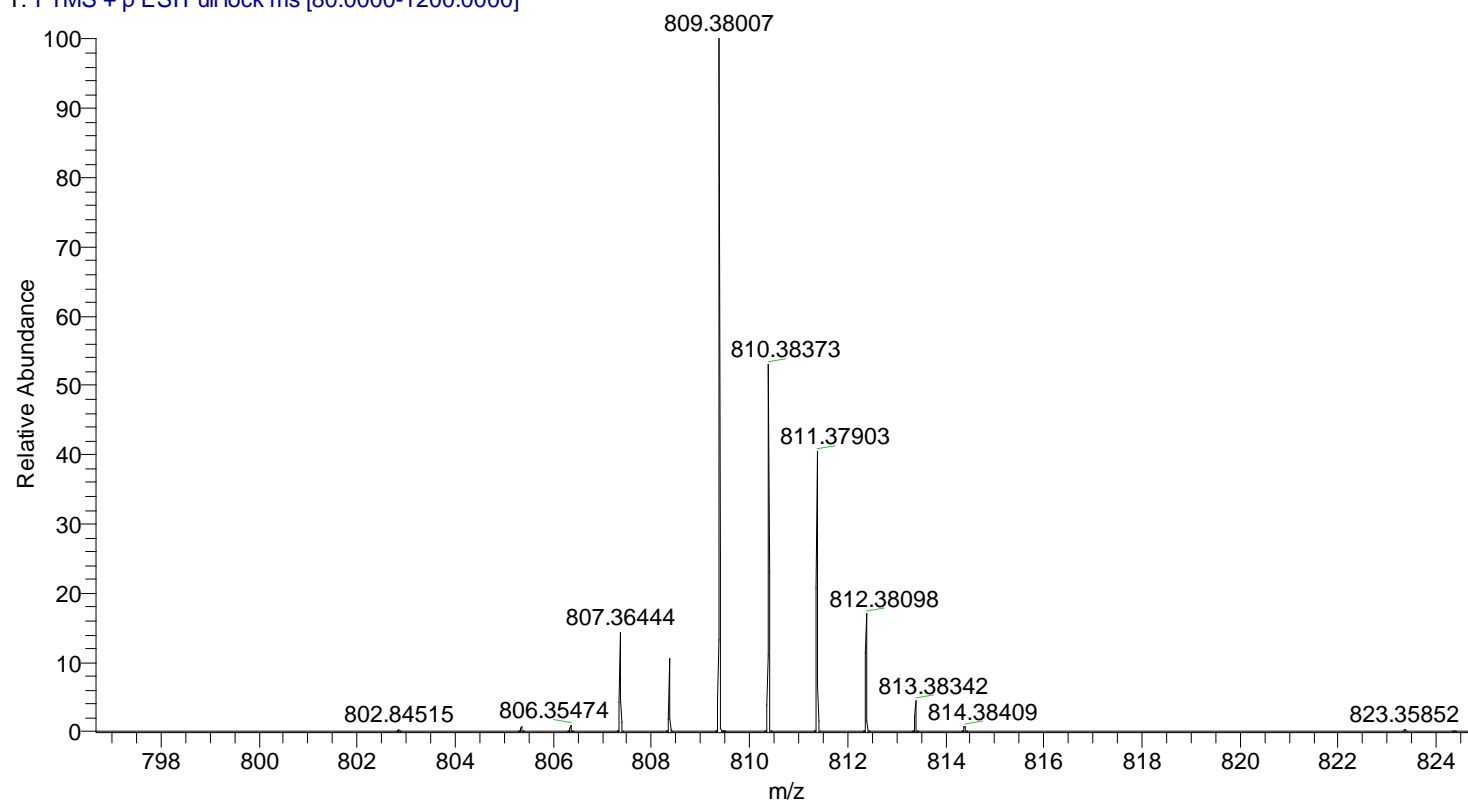

Figure S62. HRMS spectrum of compound TE-I-5.

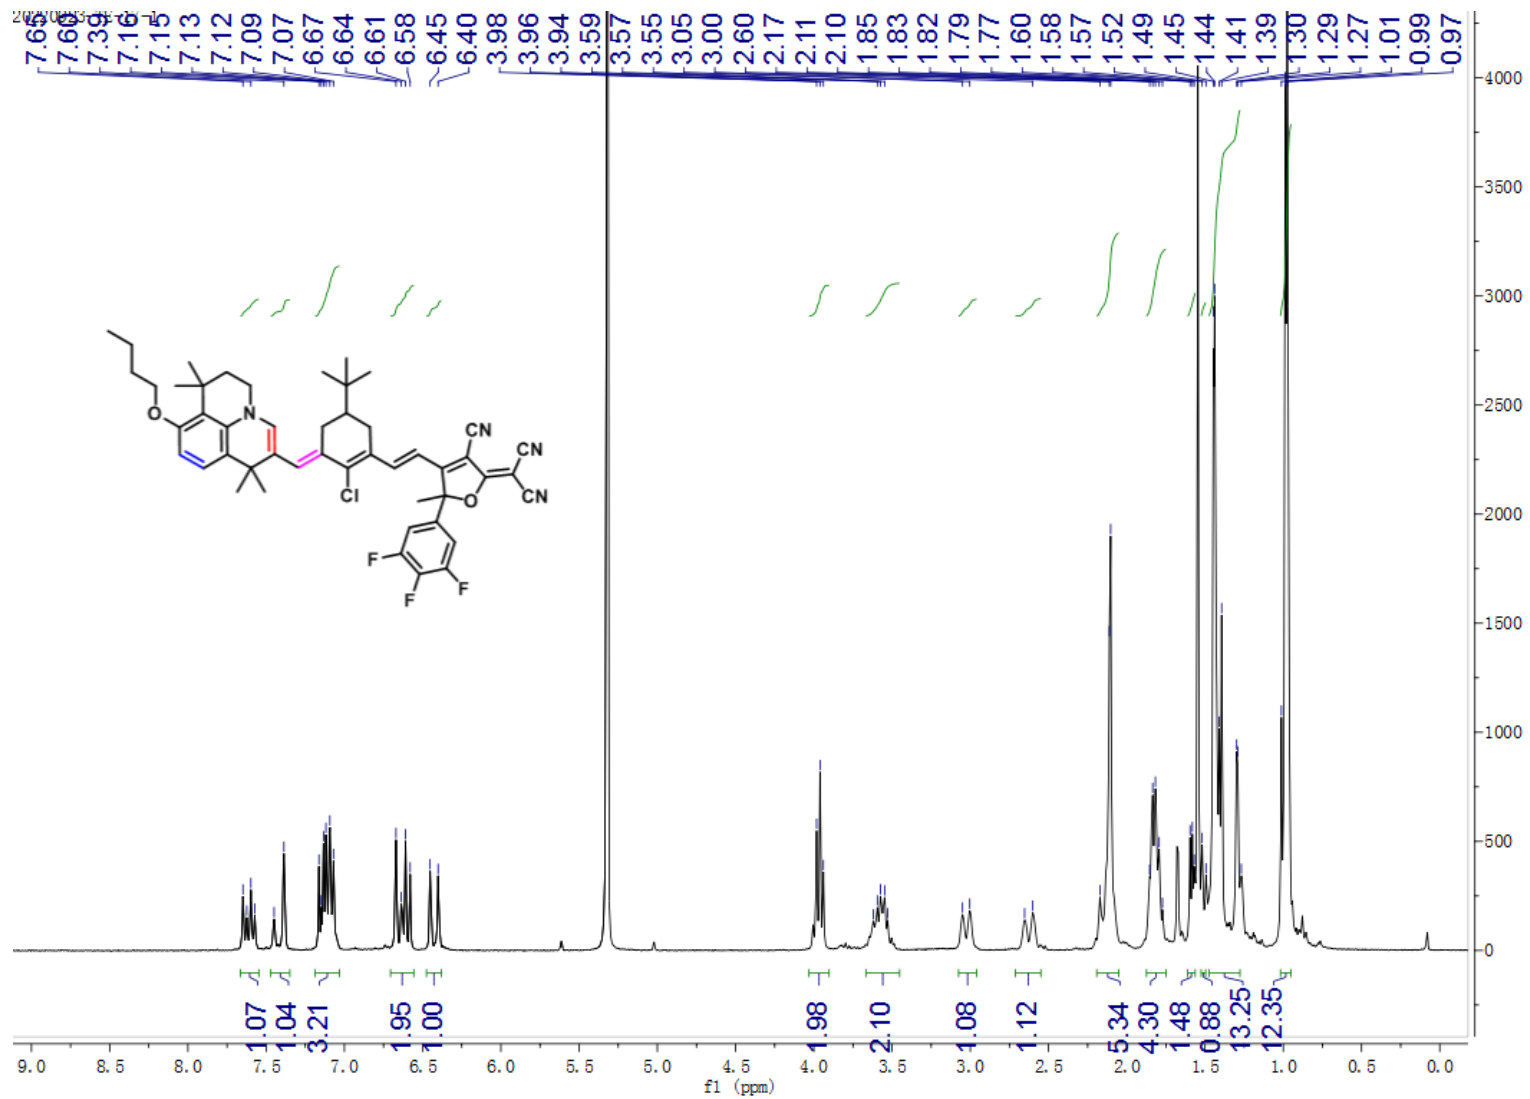

Figure S63.  $^1\text{H}$  NMR spectrum of compound TE-II-5.

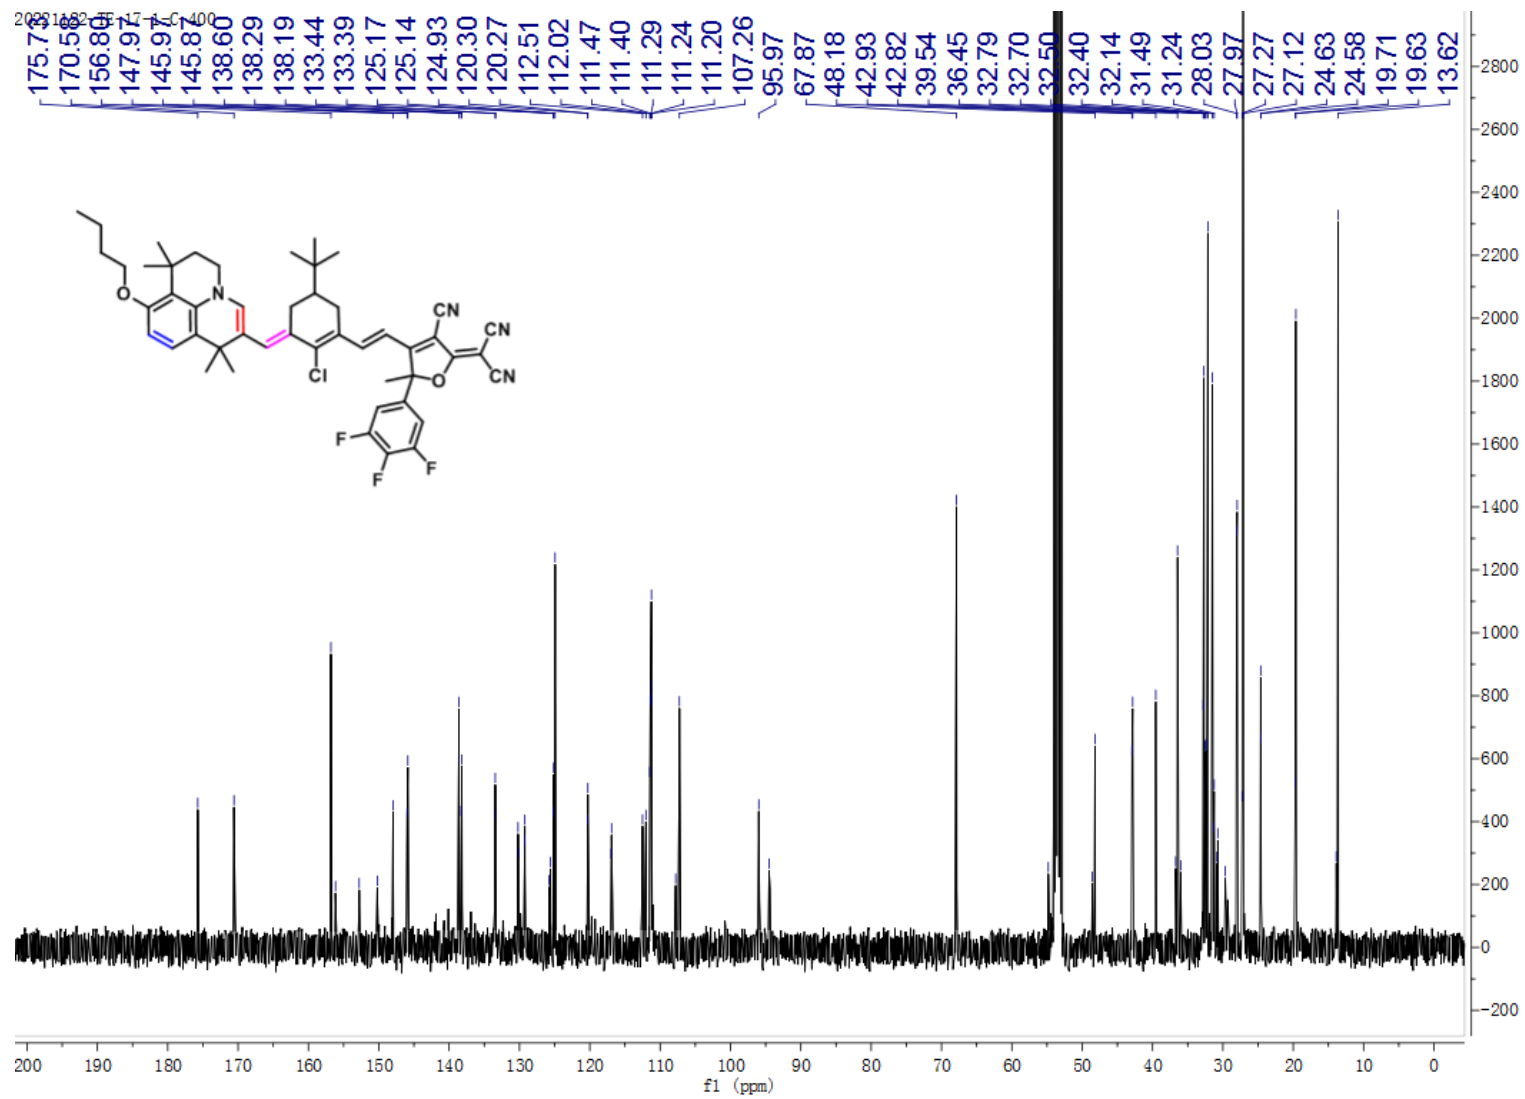

Figure S64. <sup>13</sup>C NMR spectrum of compound TE-II-5.

159-A-TE-17-1 #14 RT: 0.10 AV: 1 NL: 1.95E7  
T: FTMS + p ESI Full lock ms [80.0000-1200.0000]

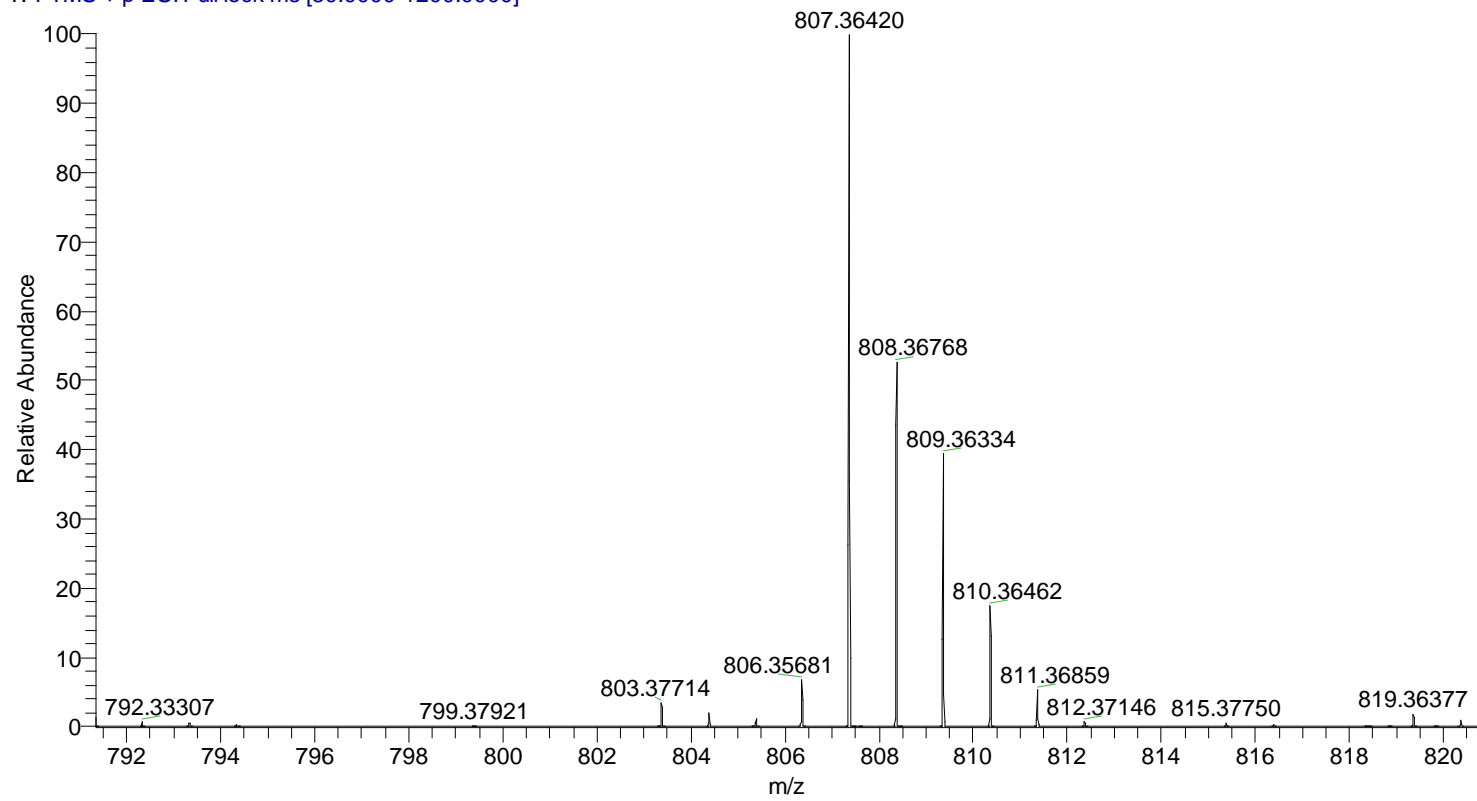

Figure S65. HRMS spectrum of compound TE-II-5.

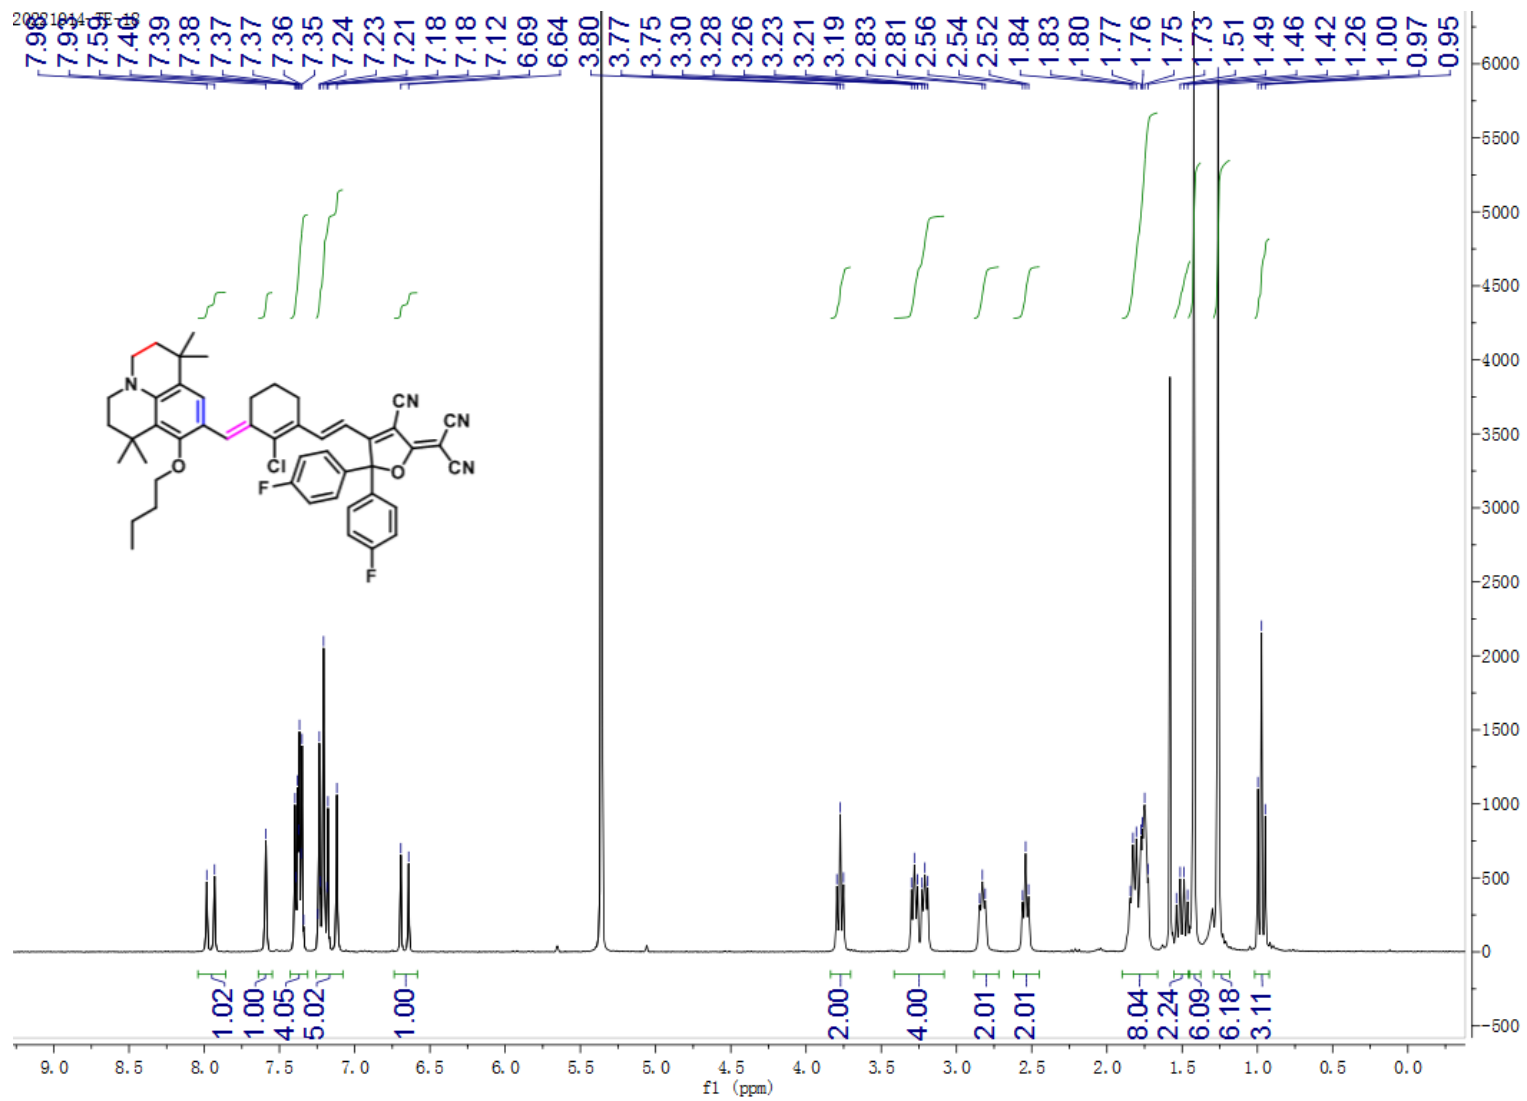

Figure S66.  $^1\text{H}$  NMR spectrum of compound TE-I-6.



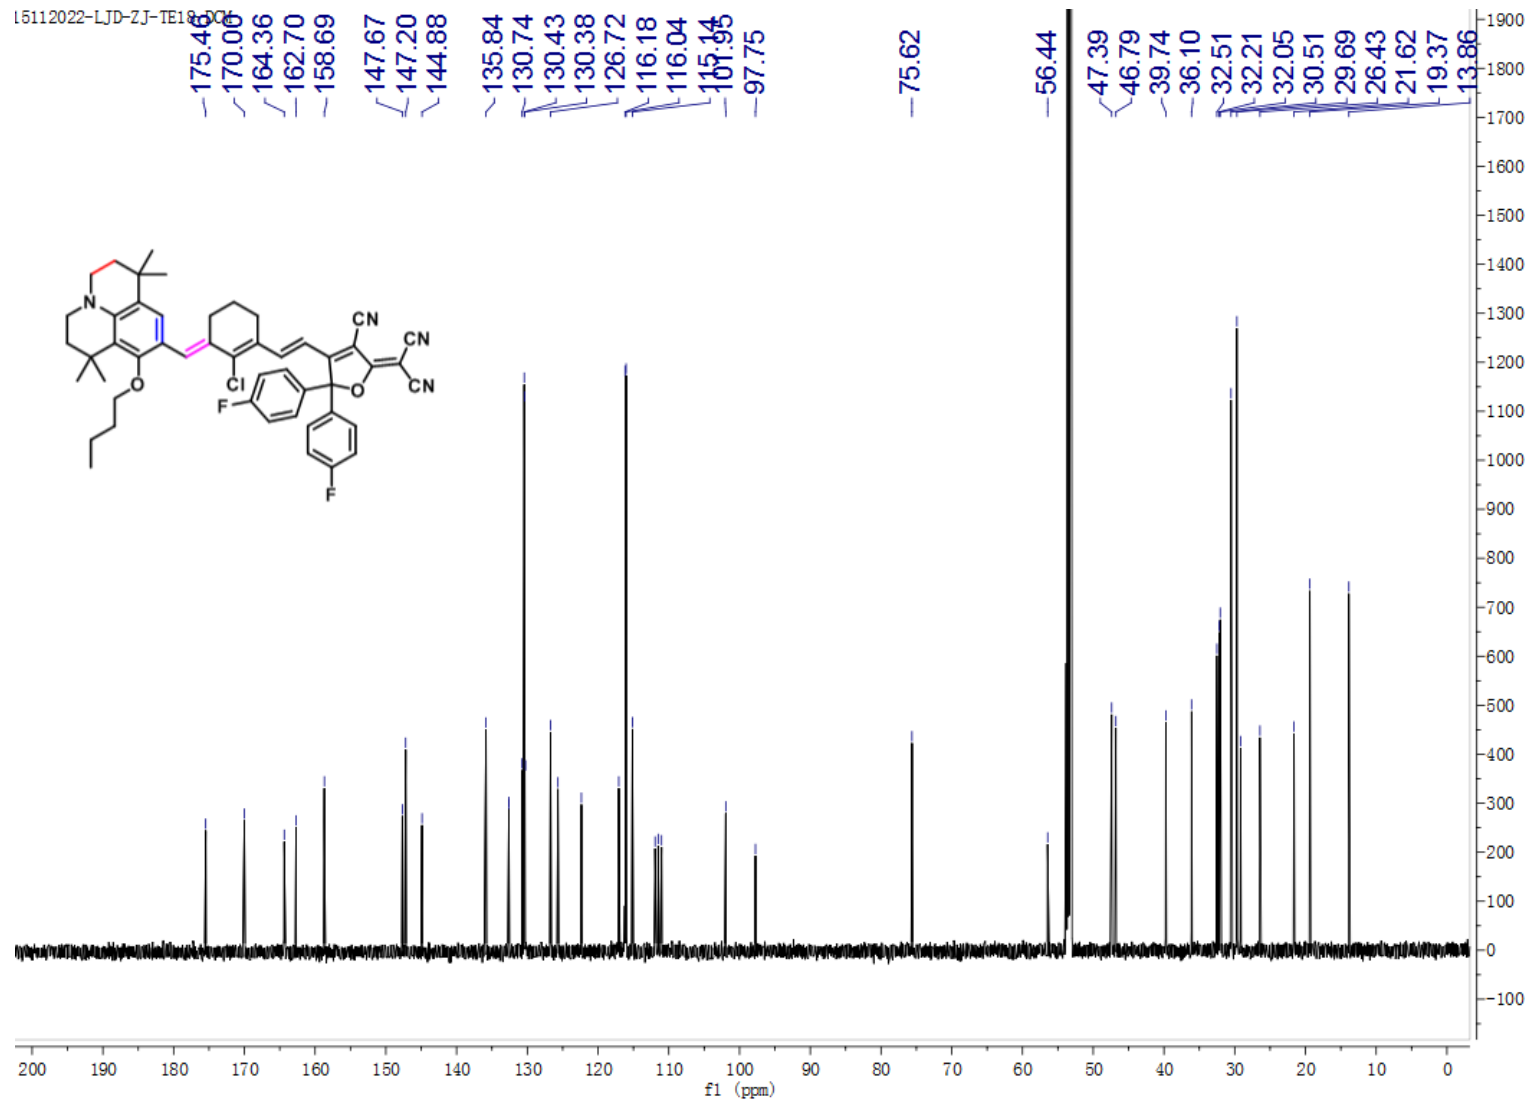

Figure S67.  $^{13}\text{C}$  NMR spectrum of compound TE-I-6.

159-A-TE-18 #14 RT: 0.10 AV: 1 NL: 2.15E7  
T: FTMS + p ESI Full lock ms [80.0000-1200.0000]

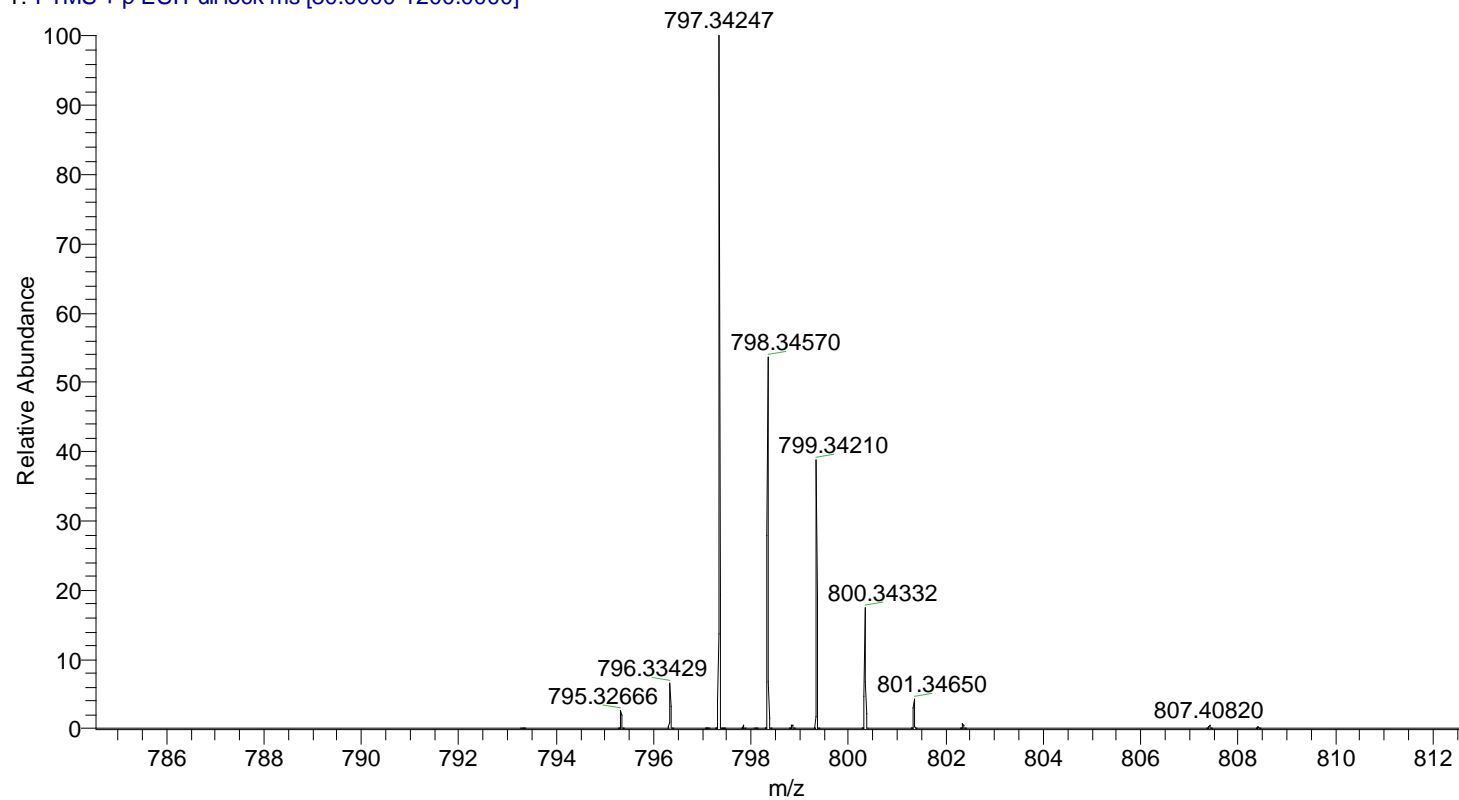

Figure S68. HRMS spectrum of compound TE-I-6.

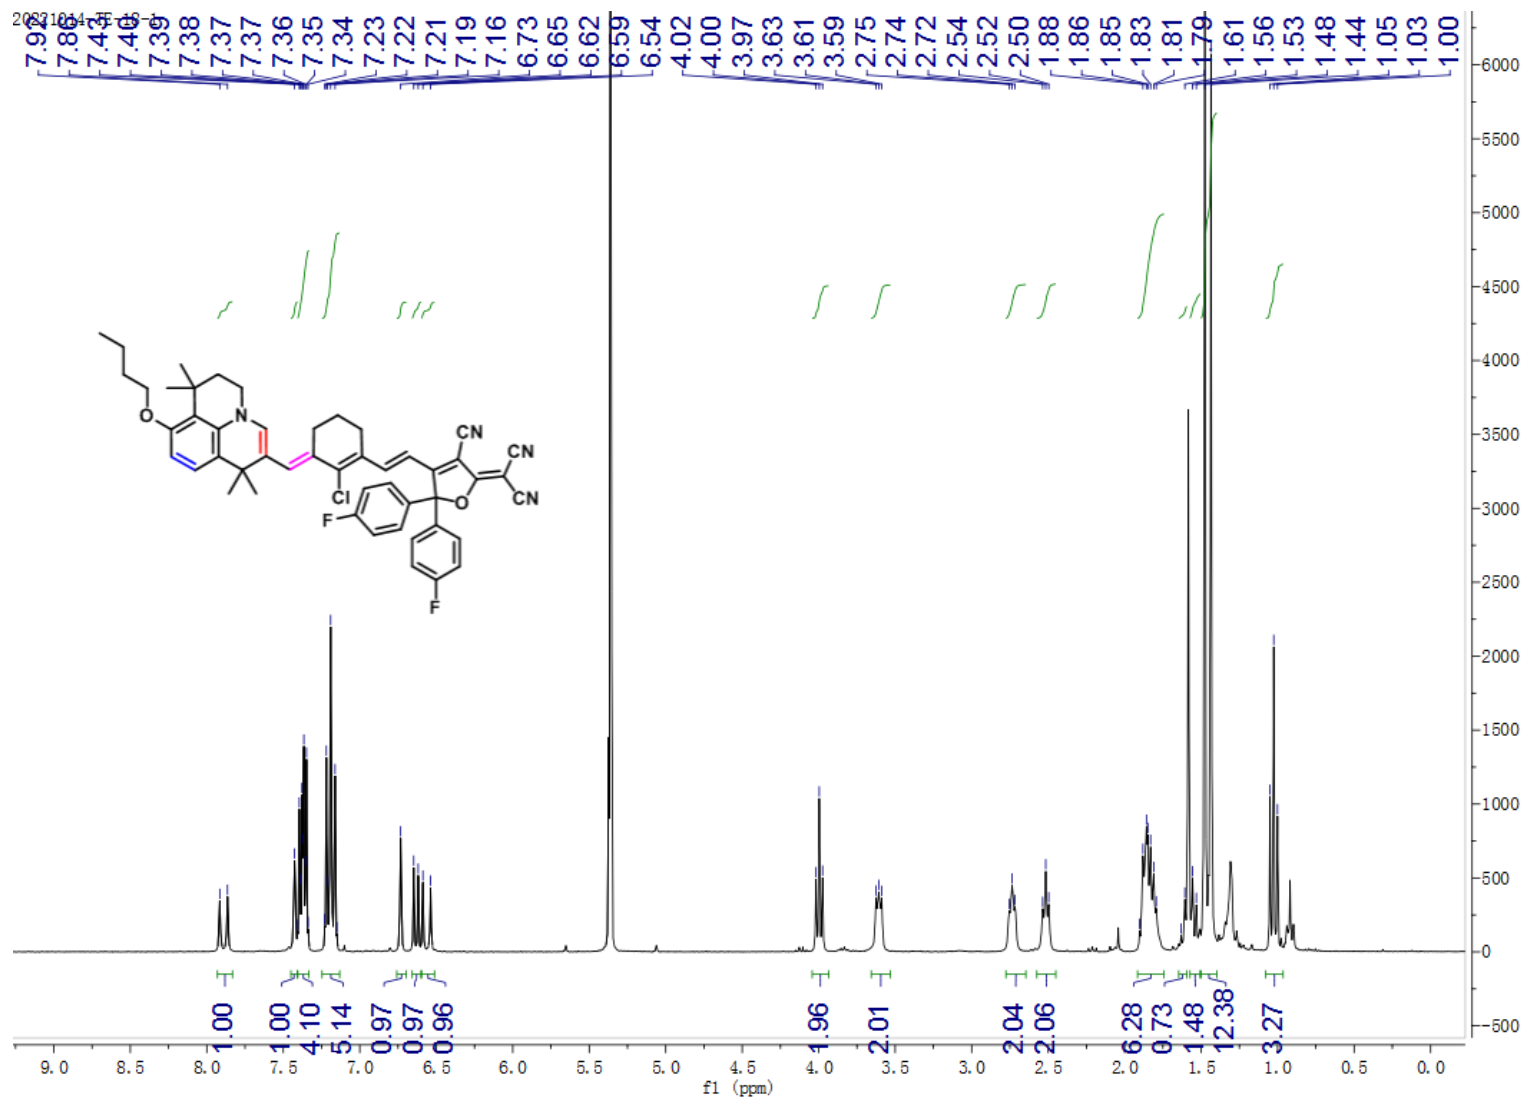

Figure S69.  $^1\text{H}$  NMR spectrum of compound TE-II-6.

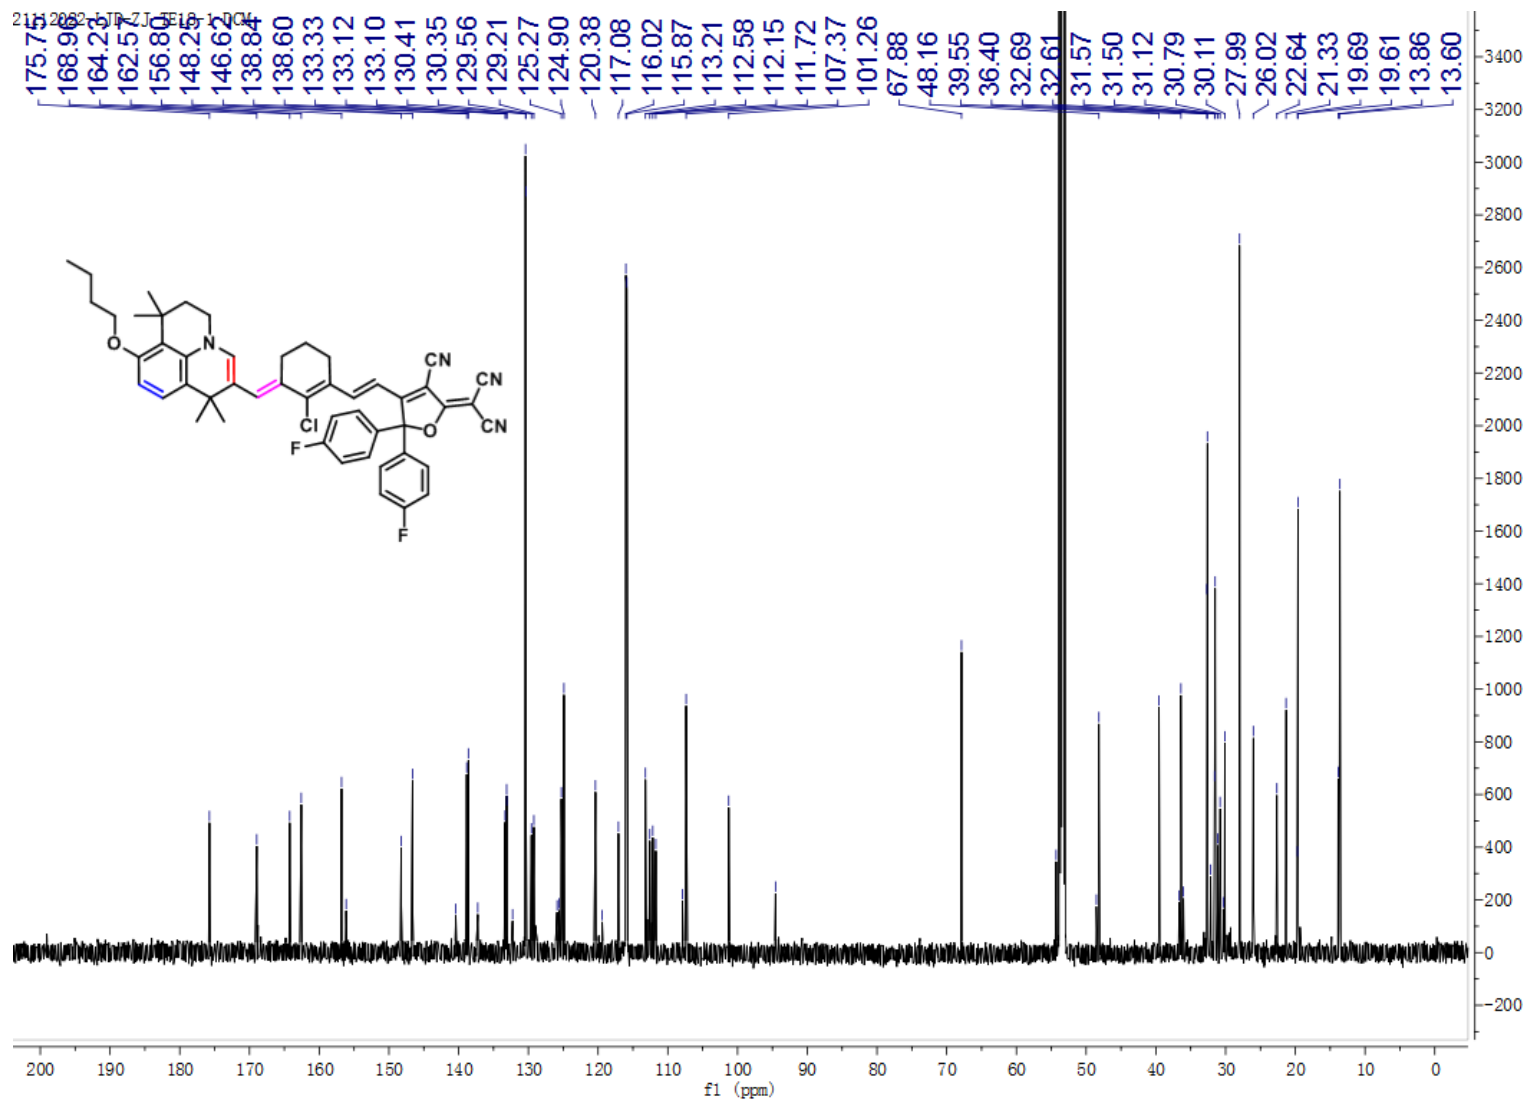

Figure S70. <sup>13</sup>C NMR spectrum of compound TE-II-6.

Accumulated - Shots 400 - 20200709; Label I7

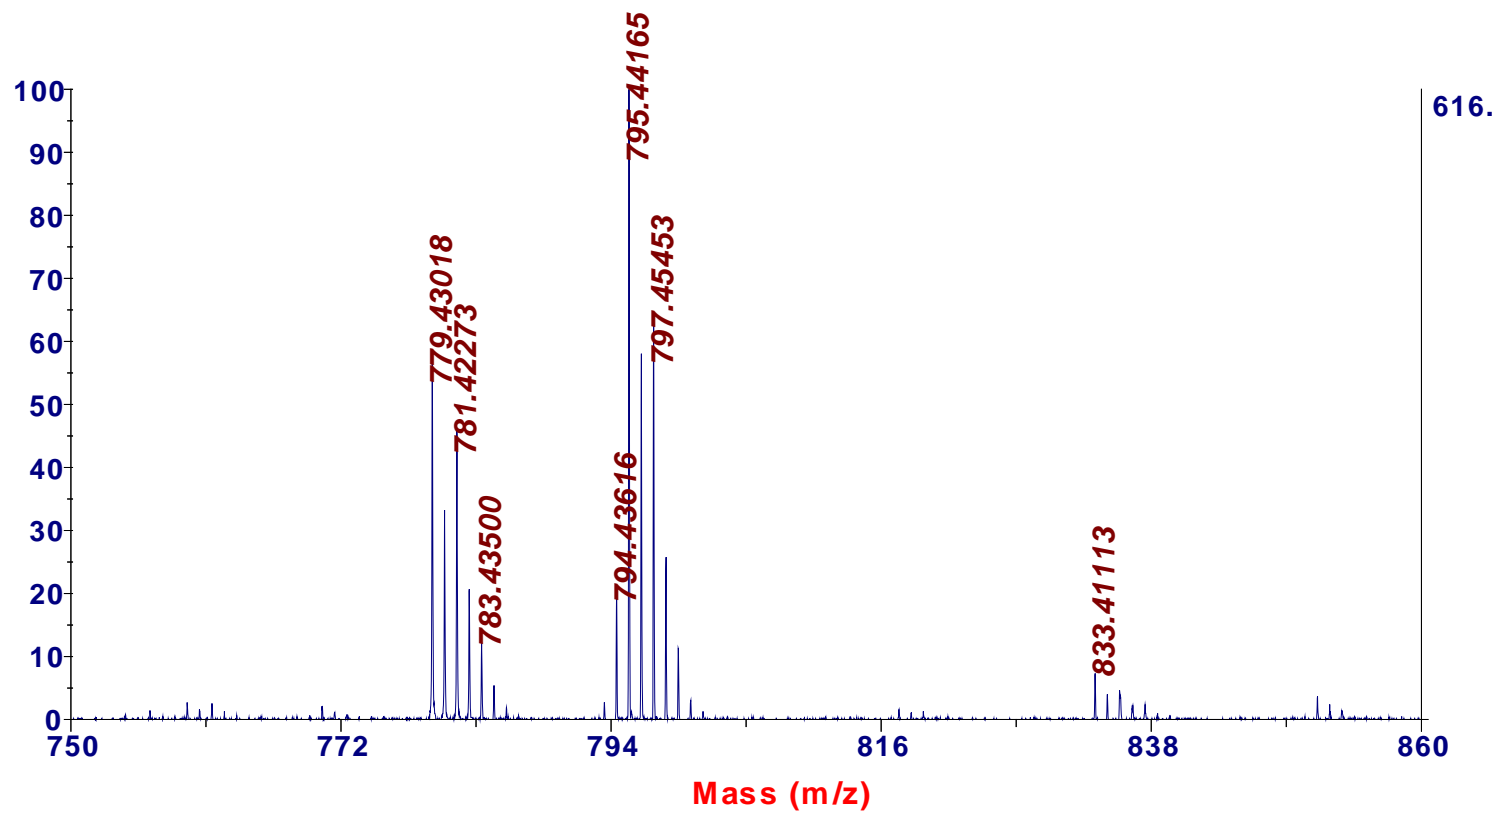

Figure S71. HRMS spectrum of compound TE-II-6.

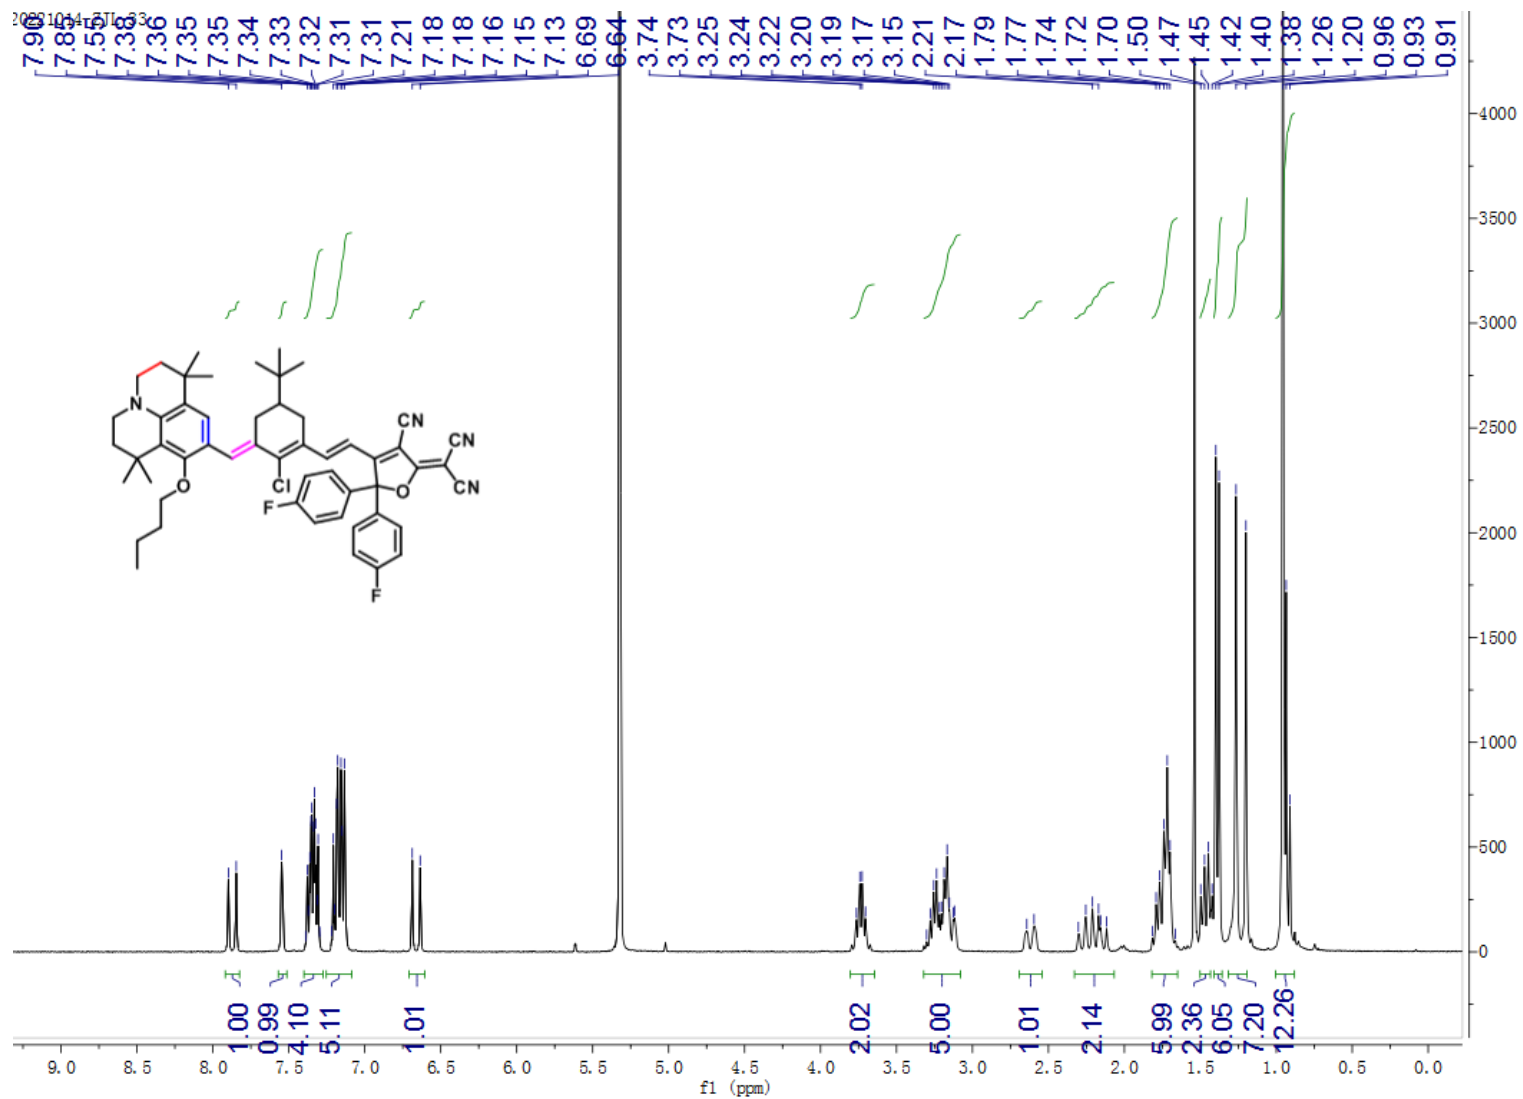

Figure S72.  $^1\text{H}$  NMR spectrum of compound TE-I-7.

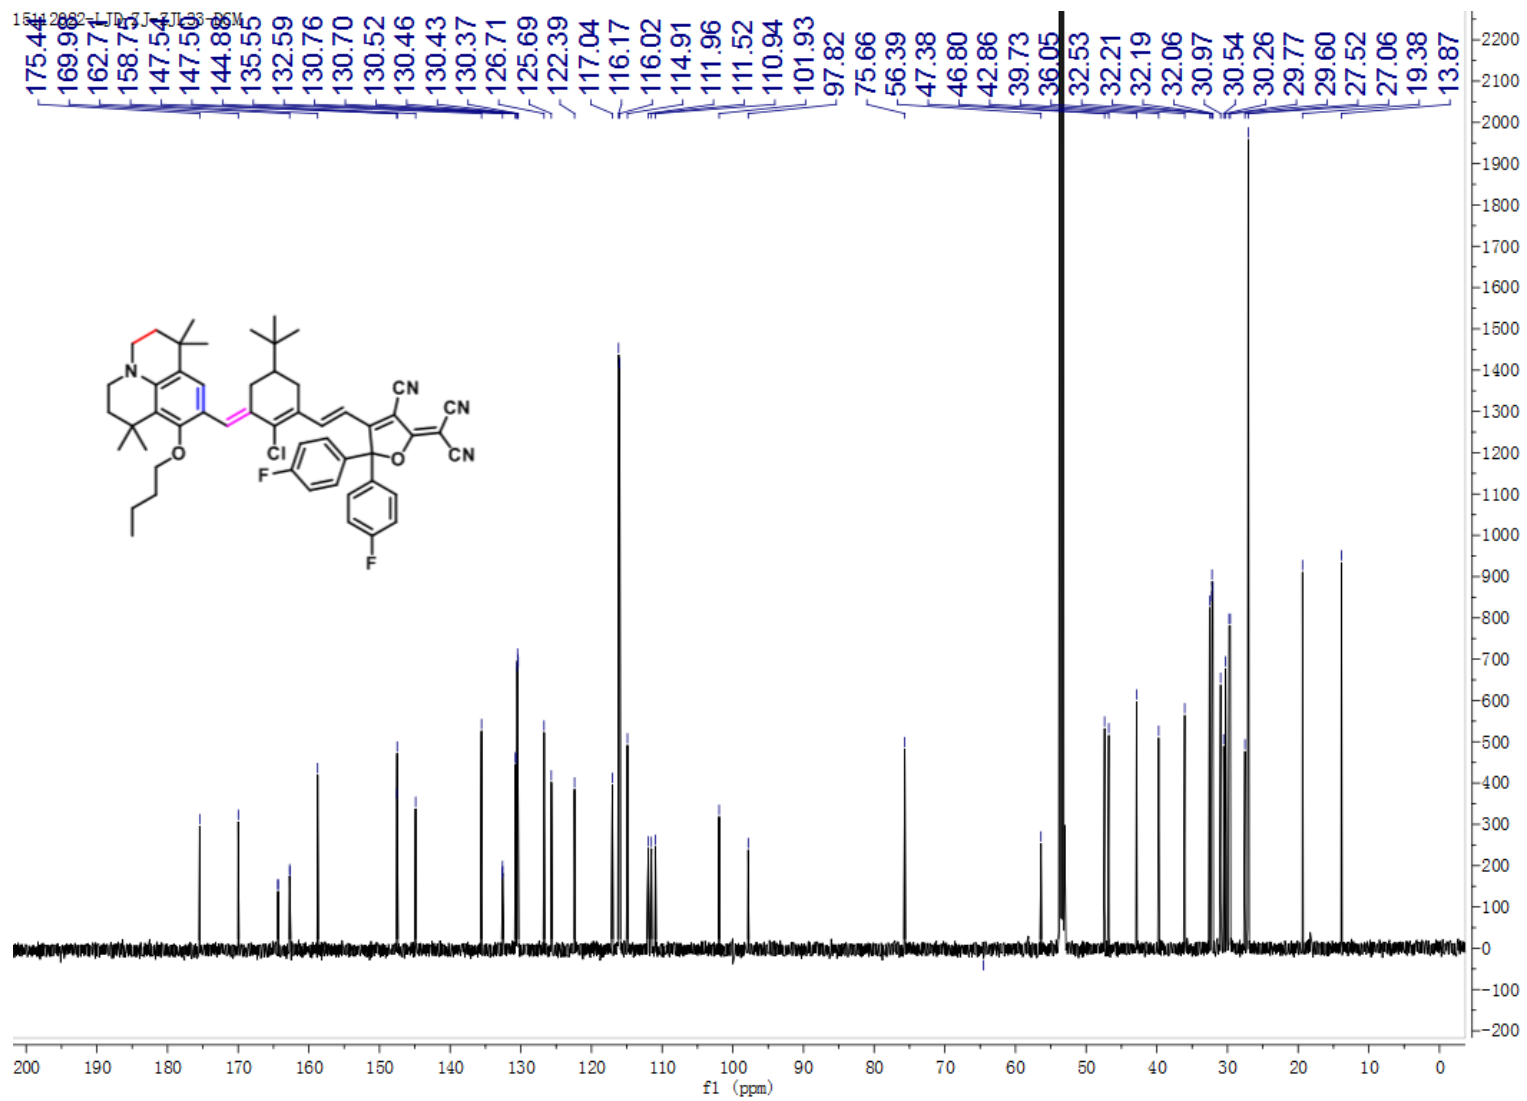

Figure S73. <sup>13</sup>C NMR spectrum of compound TE-I-7.

159-A-ZJL-23 #14 RT: 0.10 AV: 1 NL: 8.99E6  
T: FTMS + p ESI Full lock ms [80.0000-1200.0000]

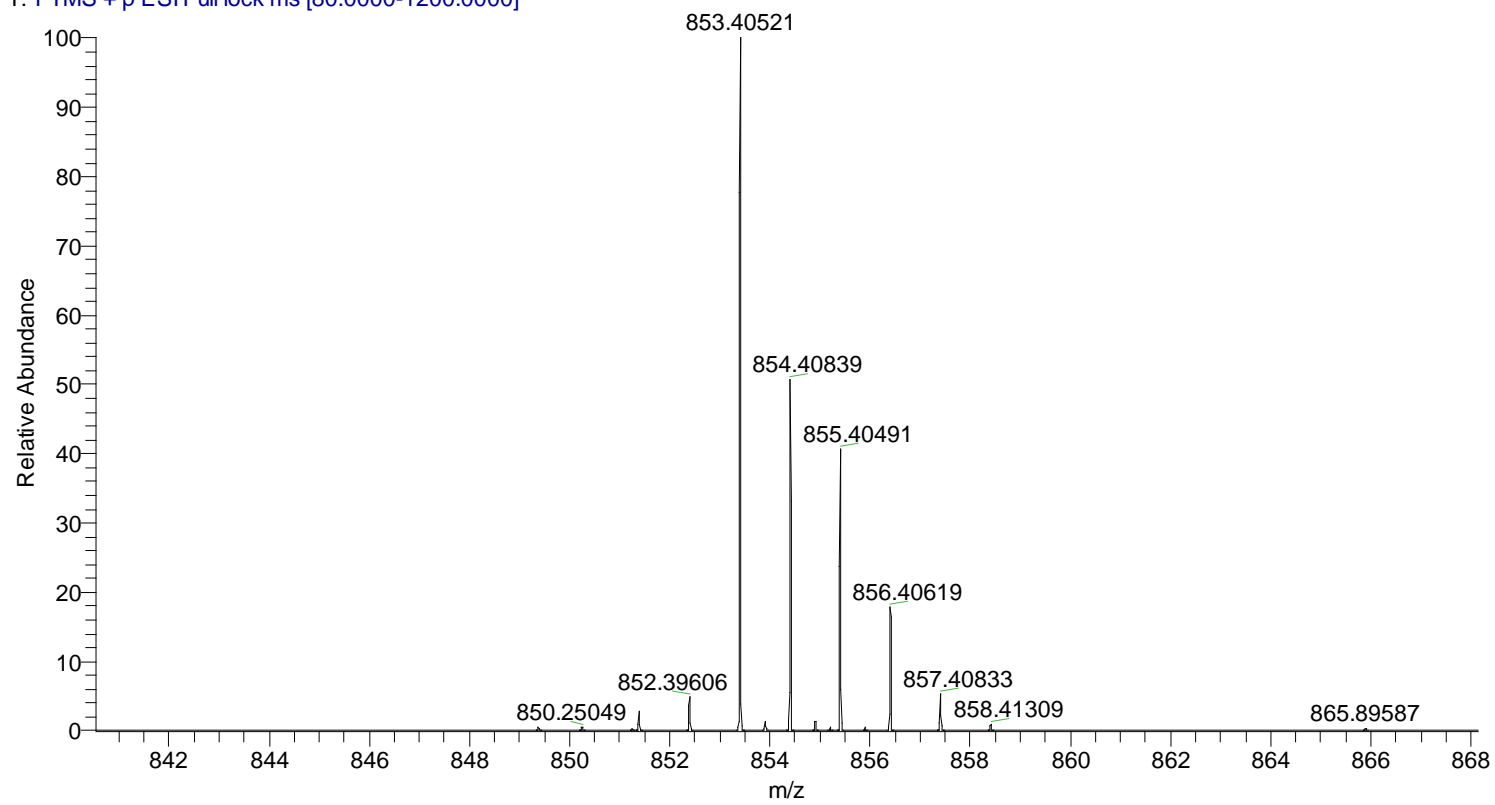

Figure S74. HRMS spectrum of compound TE-I-7.



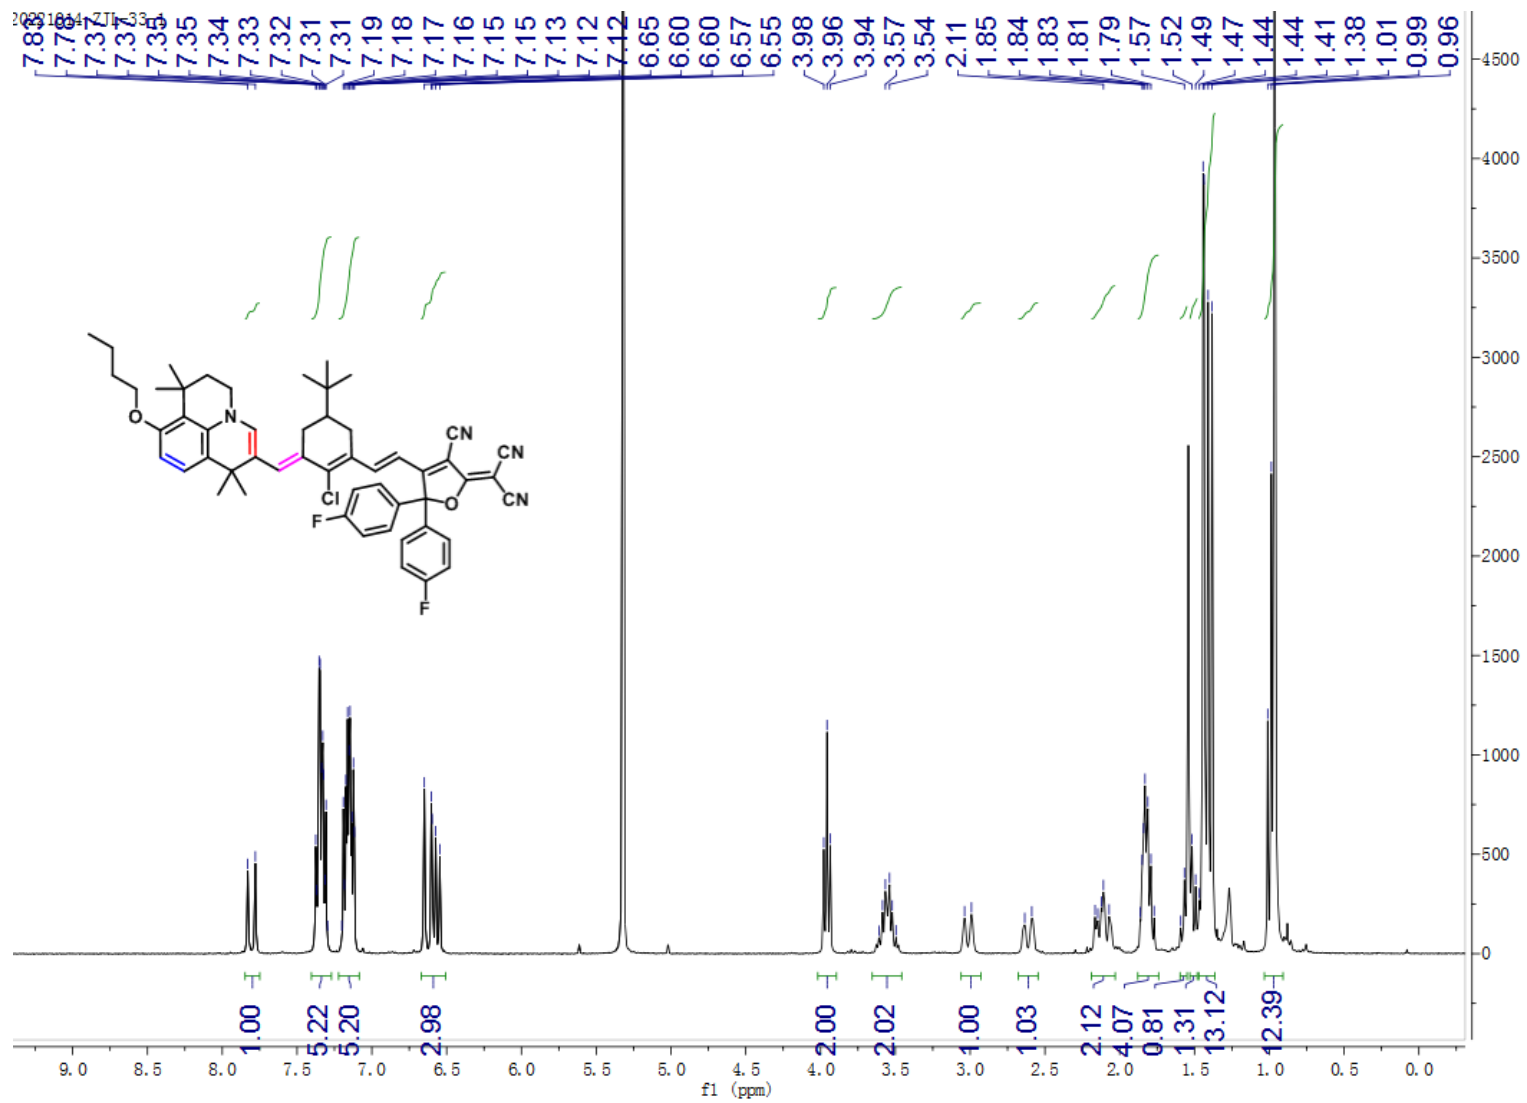

Figure S75.  $^1\text{H}$  NMR spectrum of compound TE-II-7.

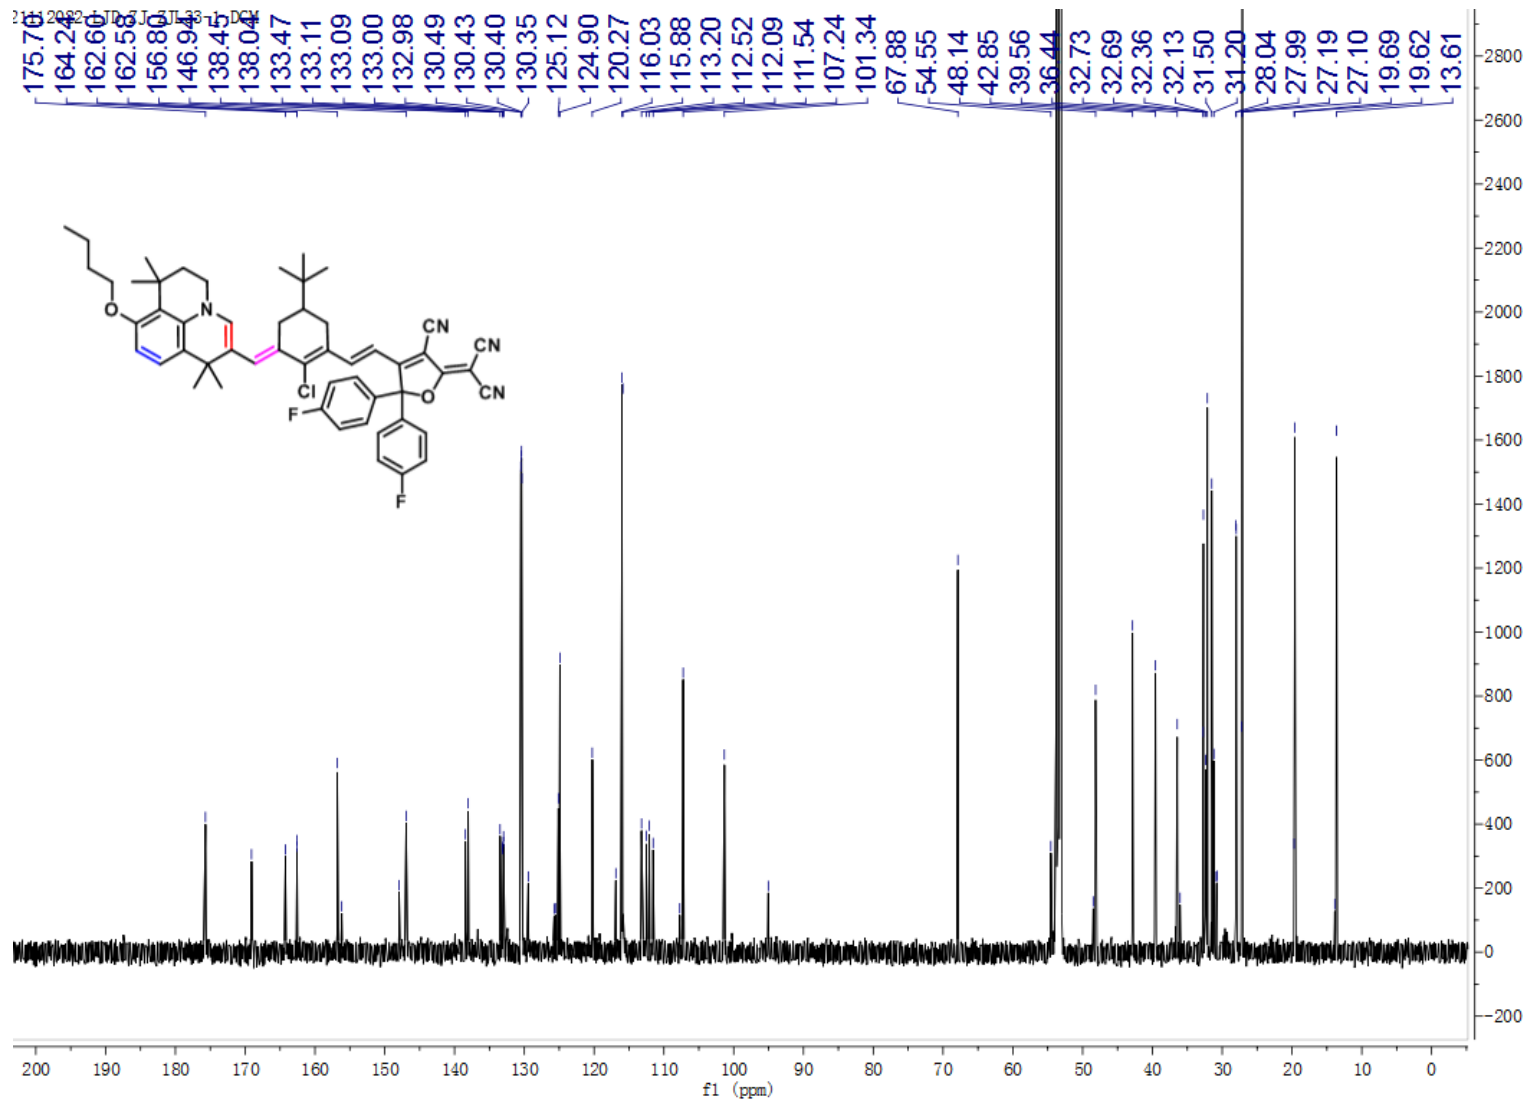

Figure S76.  $^{13}\text{C}$  NMR spectrum of compound TE-II-7.

159-A-ZJL-33-1 #16 RT: 0.11 AV: 1 NL: 2.08E6  
T: FTMS + p ESI Full lock ms [80.0000-1200.0000]

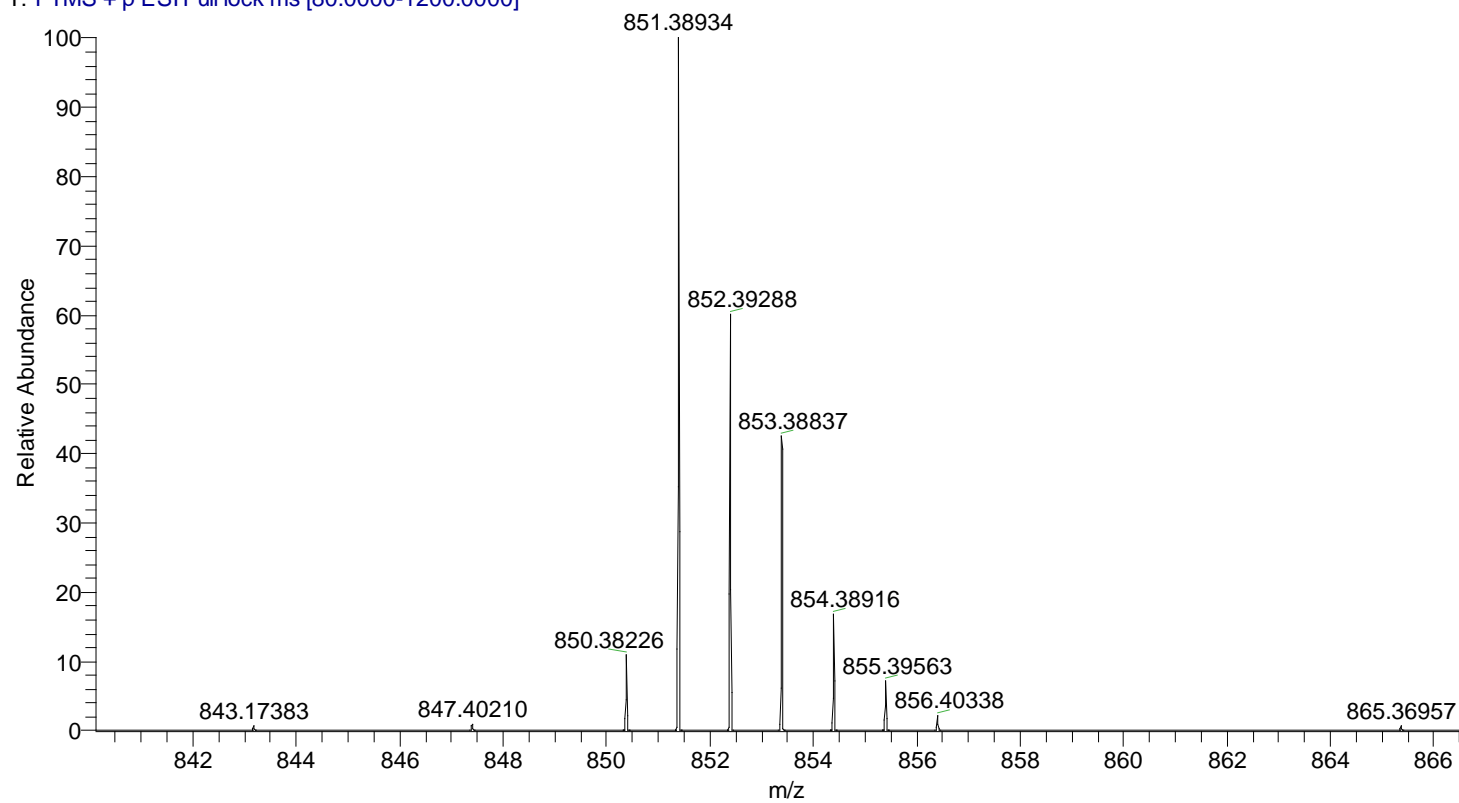

Figure S77. HRMS spectrum of compound **TE-II-7**.

Accumulated - Shots 1200 - 20200709; Label E7

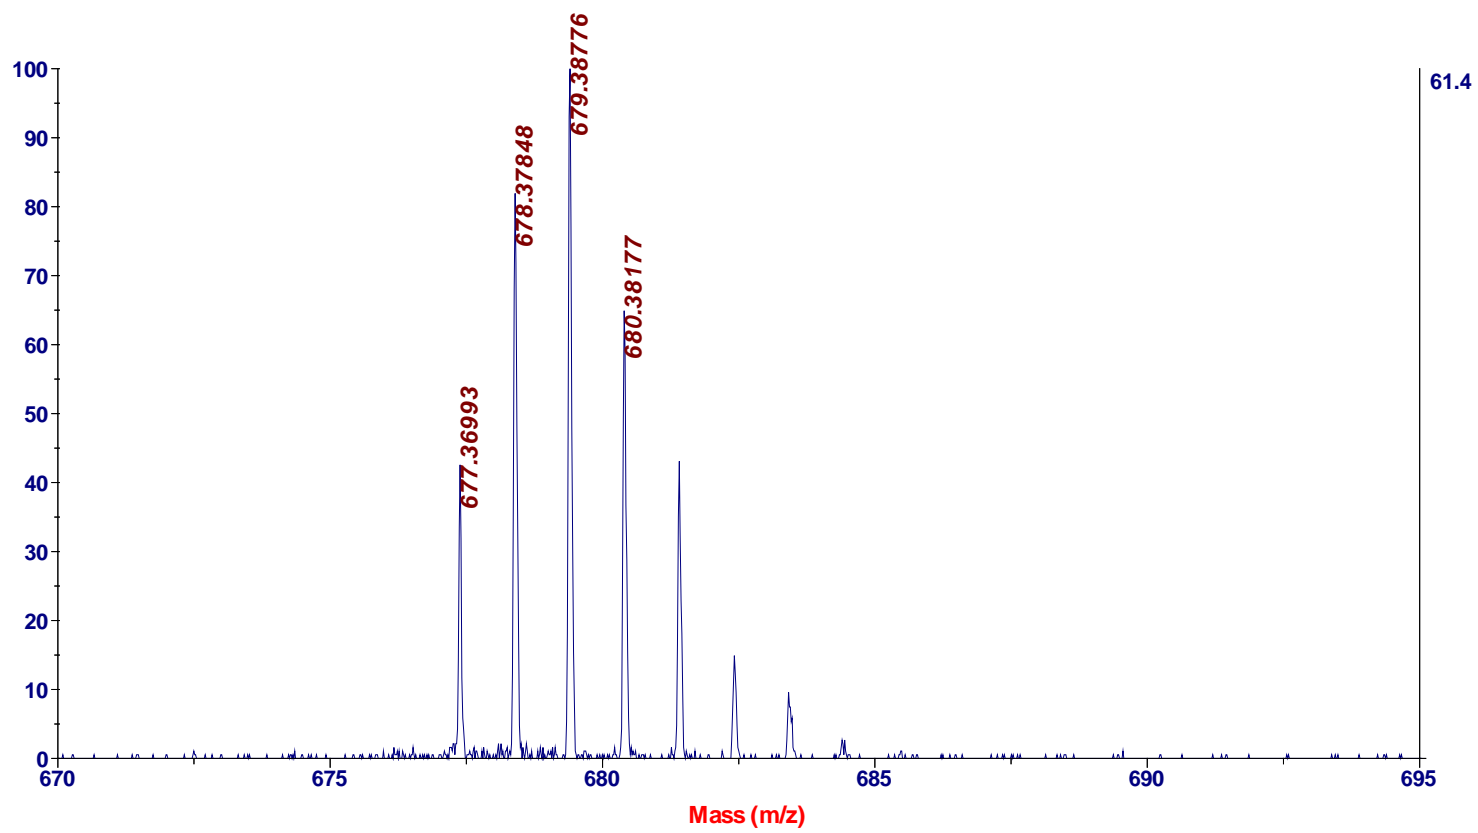

Figure S78. HRMS spectrum of compound TE-I-8.

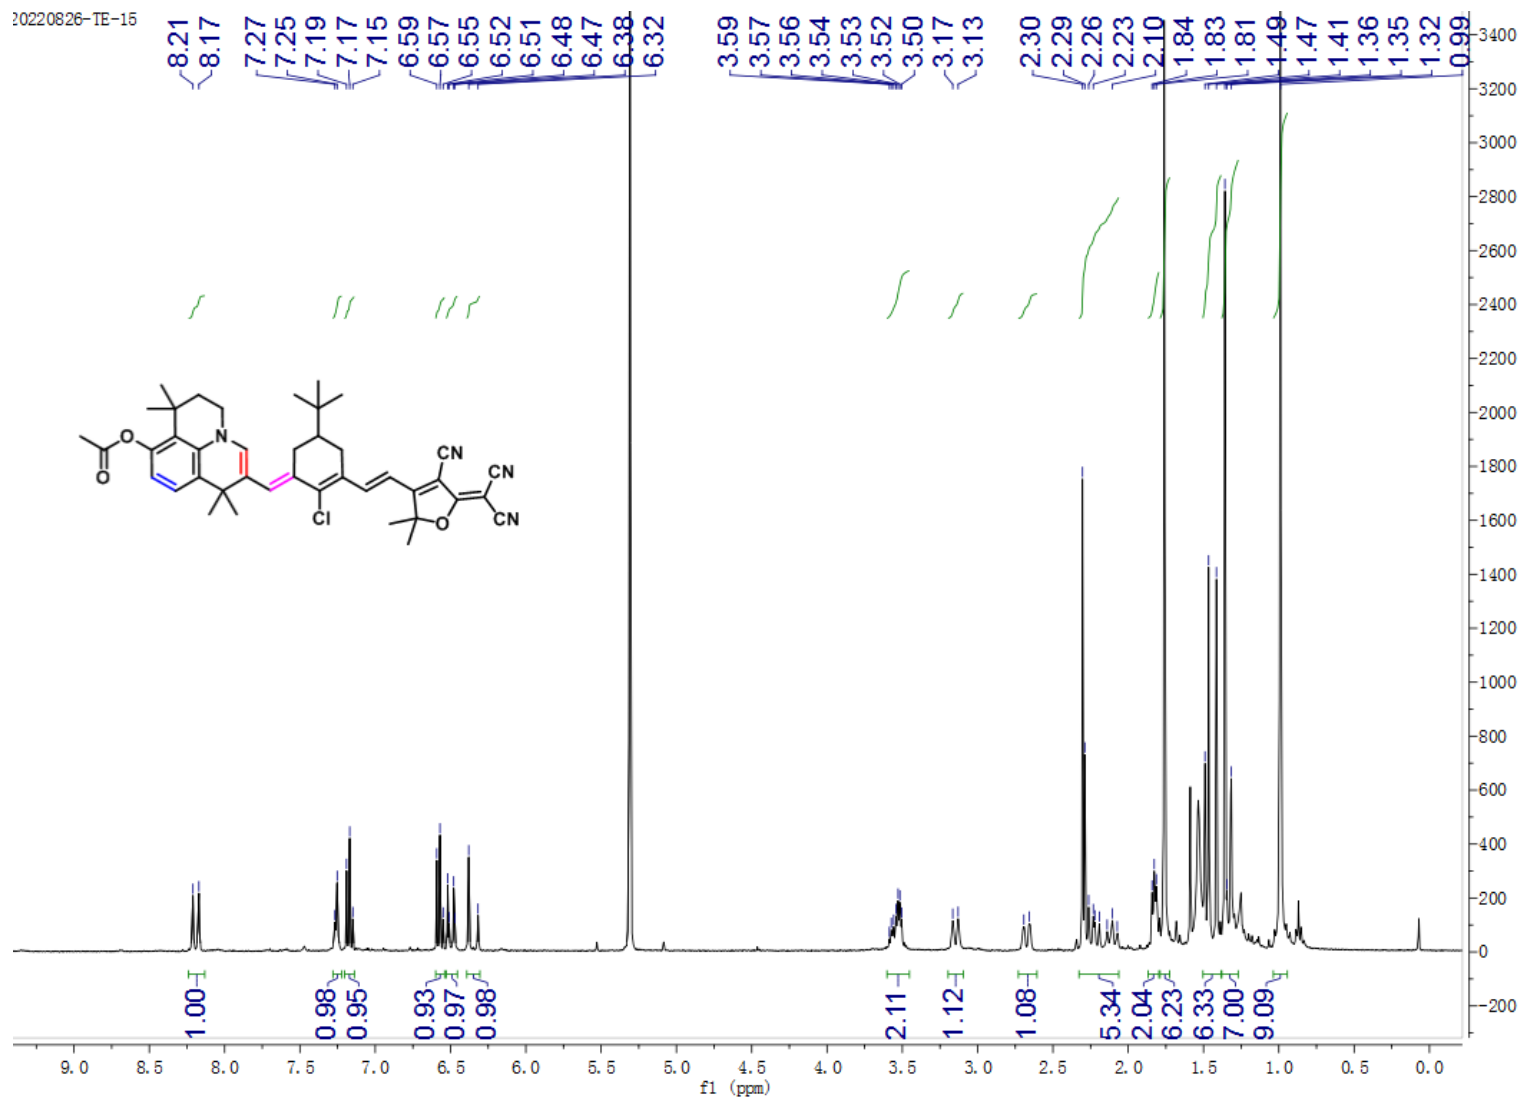

Figure S79.  $^1\text{H}$  NMR spectrum of compound TE-II-8.

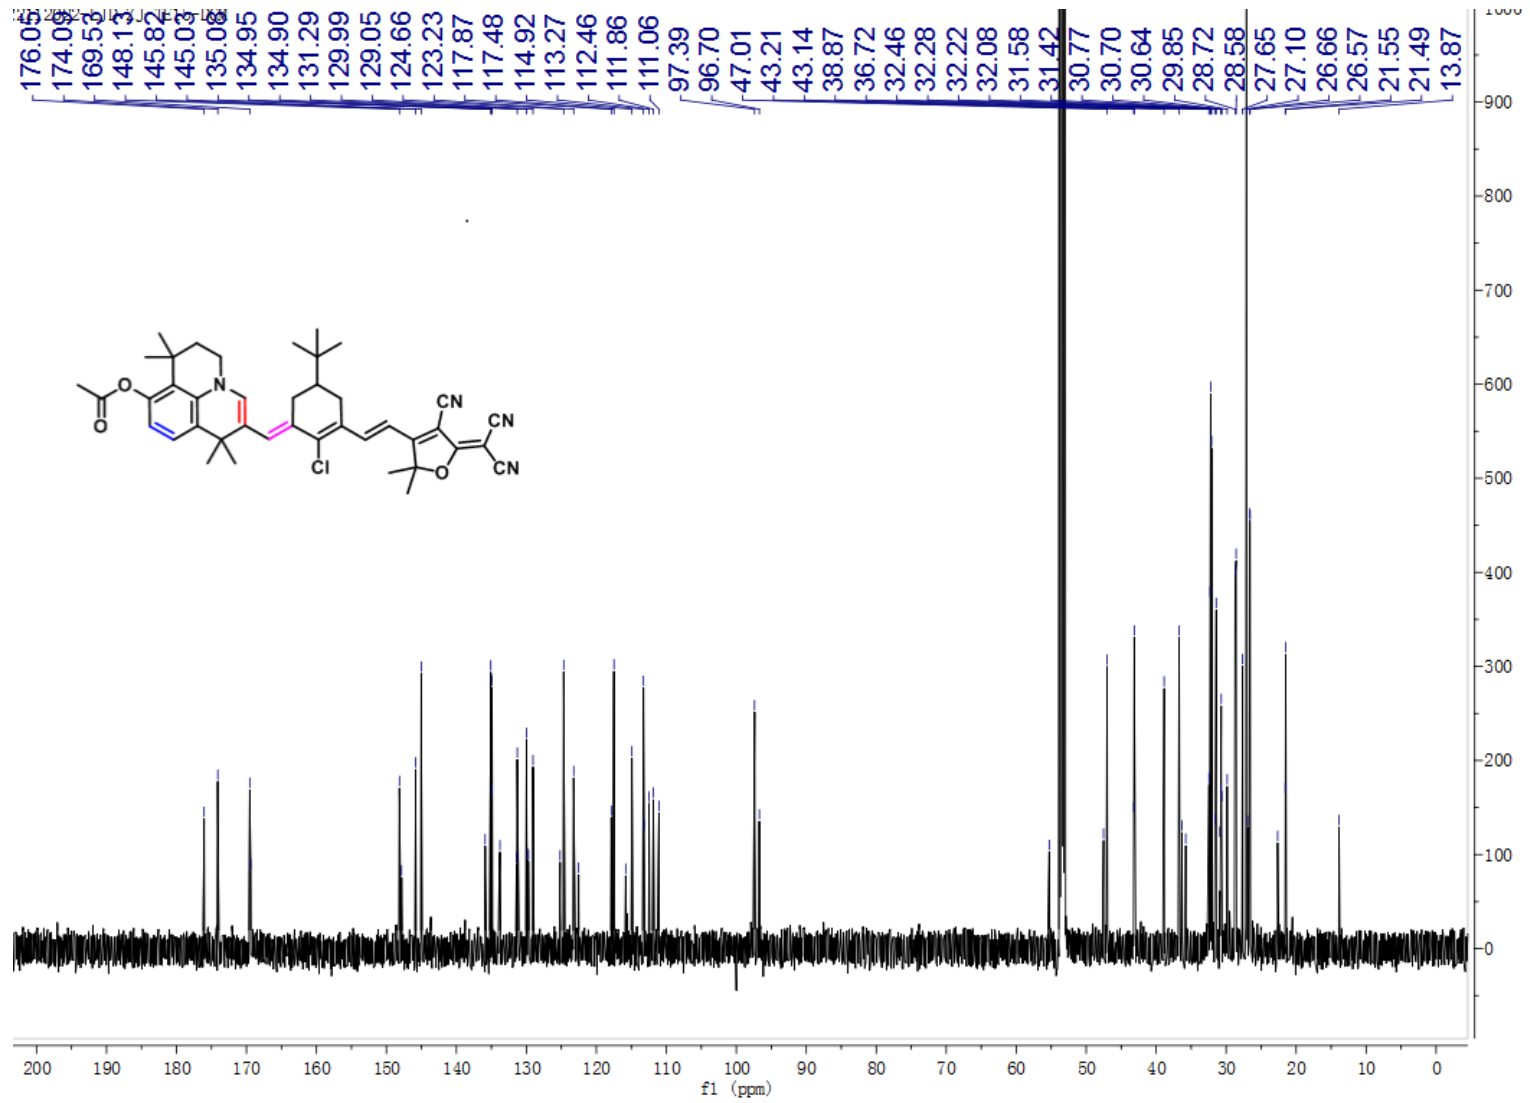

Figure S80. <sup>13</sup>C NMR spectrum of compound TE-II-8.

159-A-TE-15 #15 RT: 0.10 AV: 1 NL: 3.68E7  
T: FTMS + p ESI Full lock ms [80.0000-1200.0000]

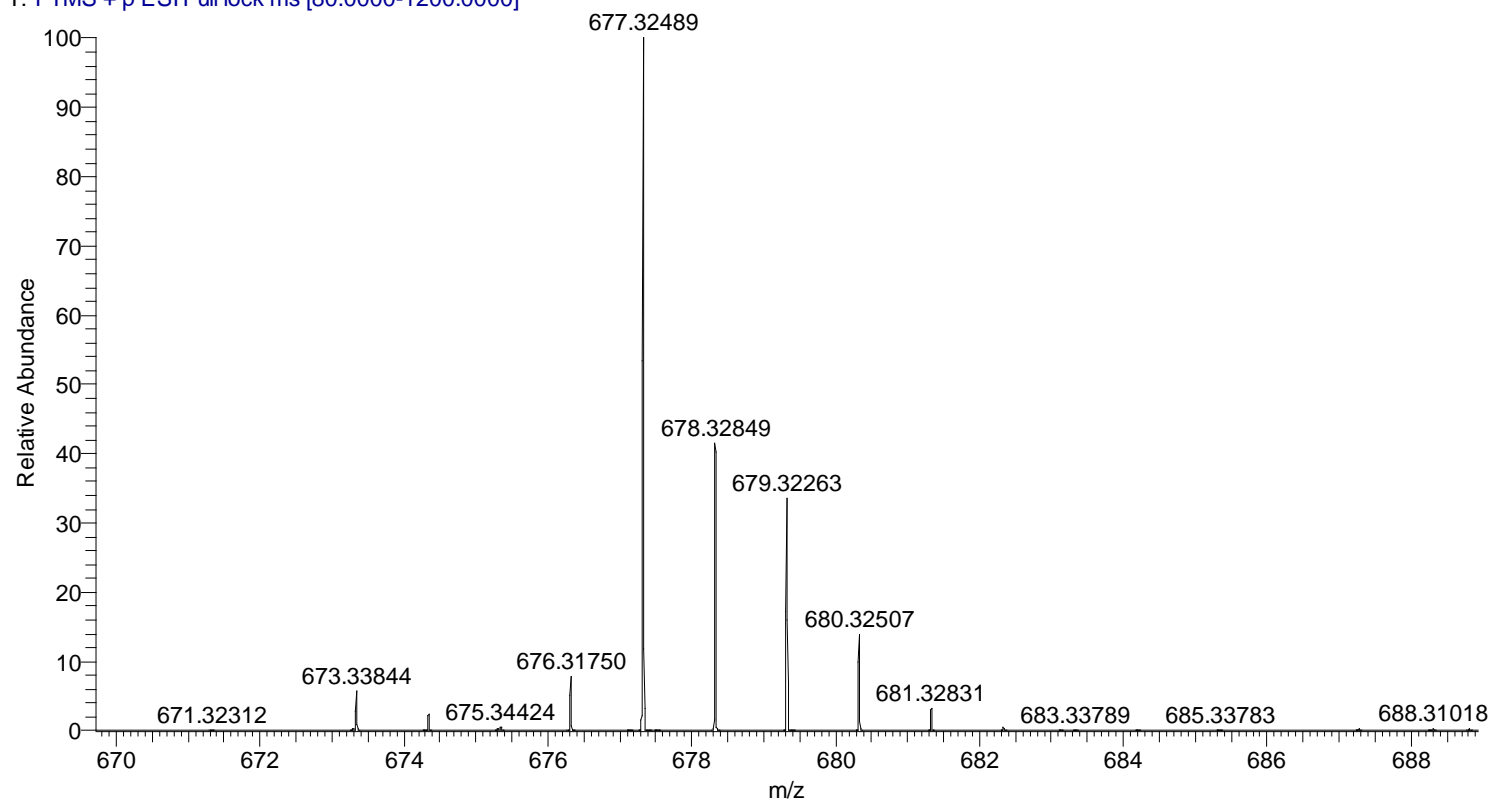

Figure S81. HRMS spectrum of compound TE-II-8.

20220514-TE-10

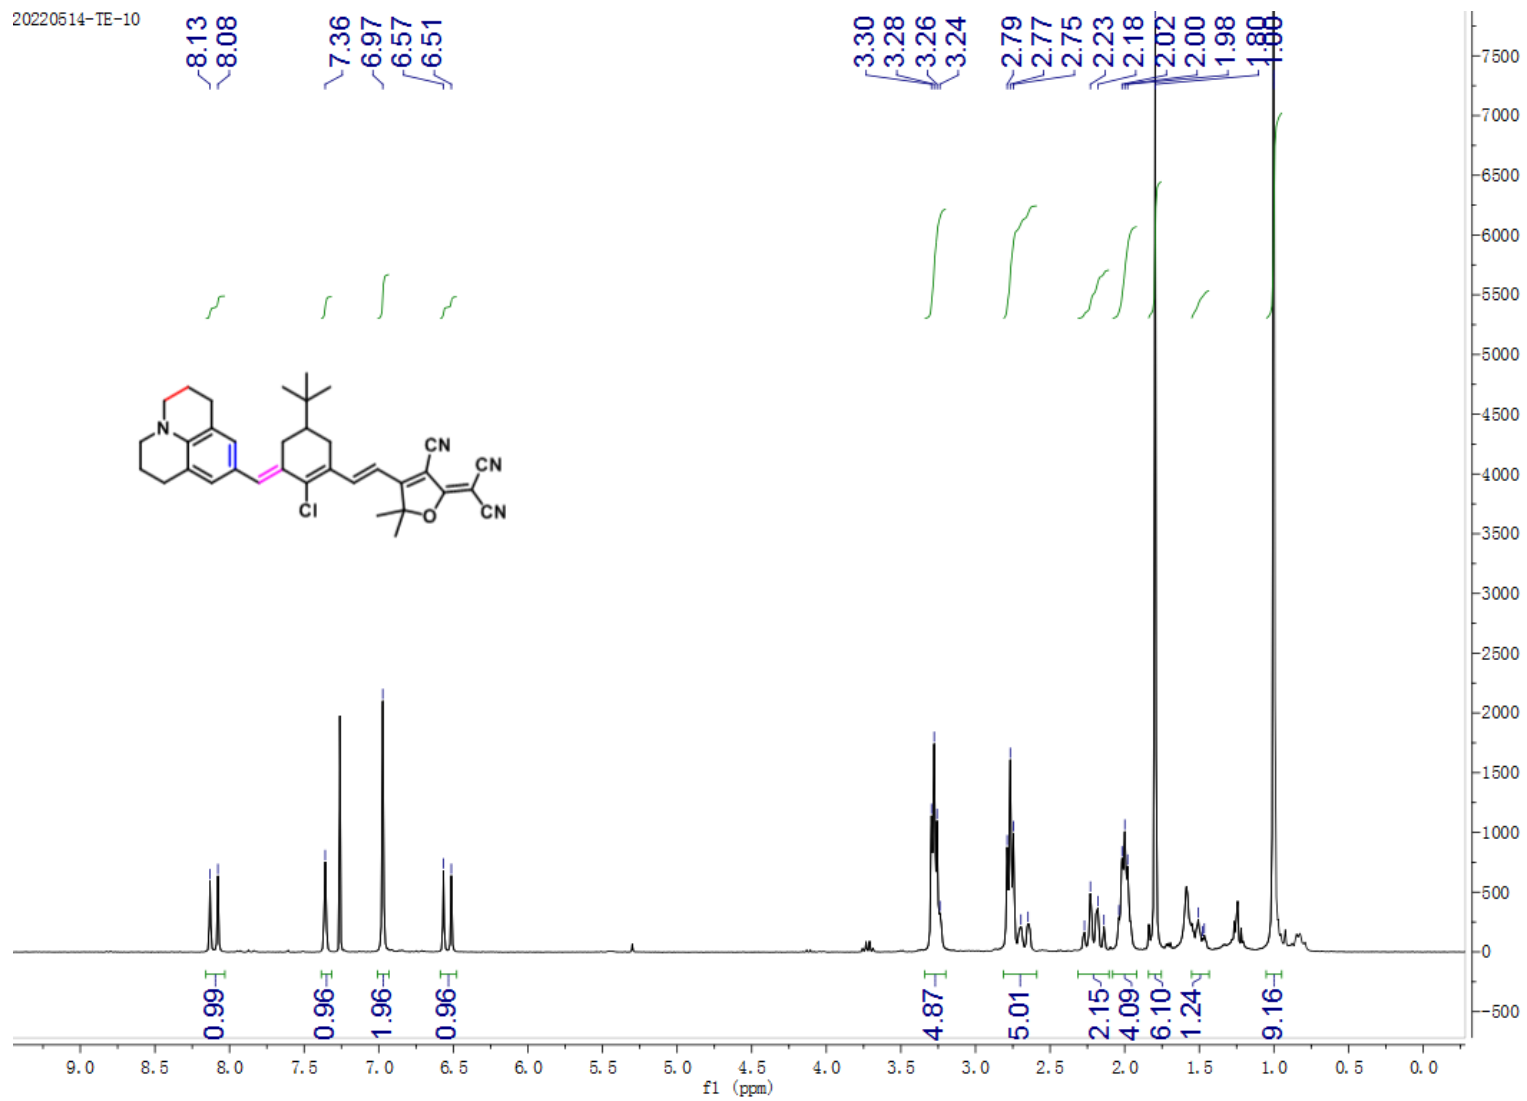

Figure S82.  $^1\text{H}$  NMR spectrum of compound TE-I-9.



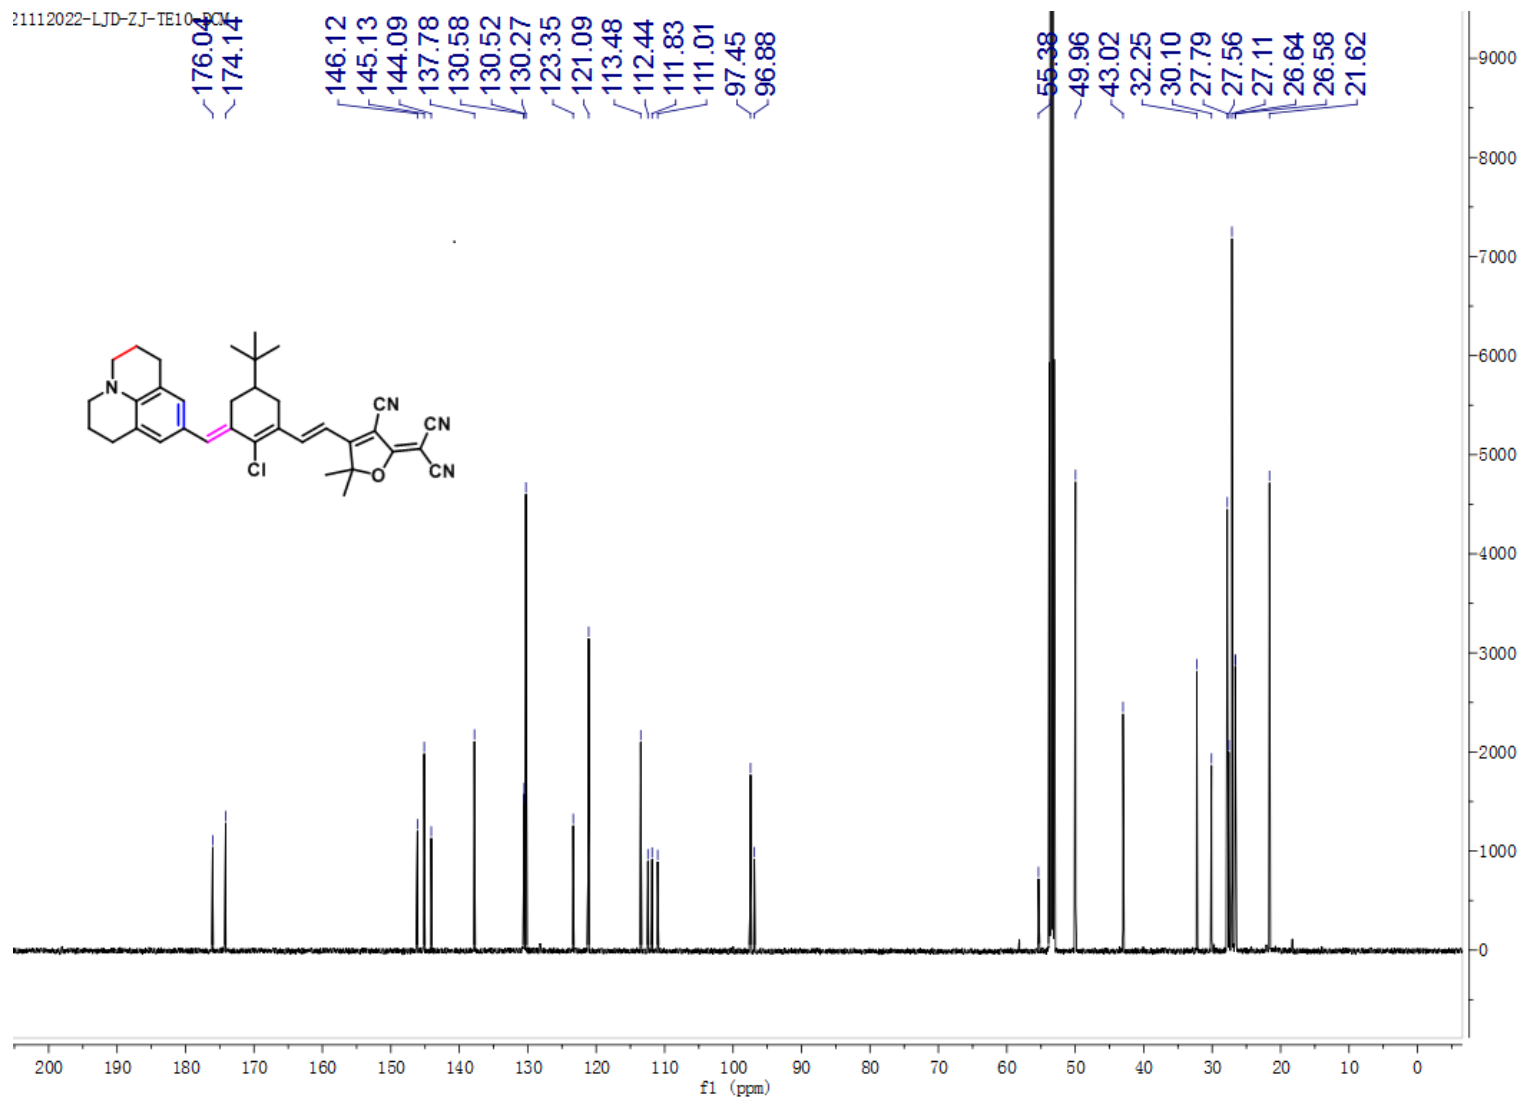

Figure S83.  $^{13}\text{C}$  NMR spectrum of compound TE-I-9.

159-A-TE-10 #14 RT: 0.10 AV: 1 NL: 1.44E7  
T: FTMS + p ESI Full lock ms [80.0000-1200.0000]

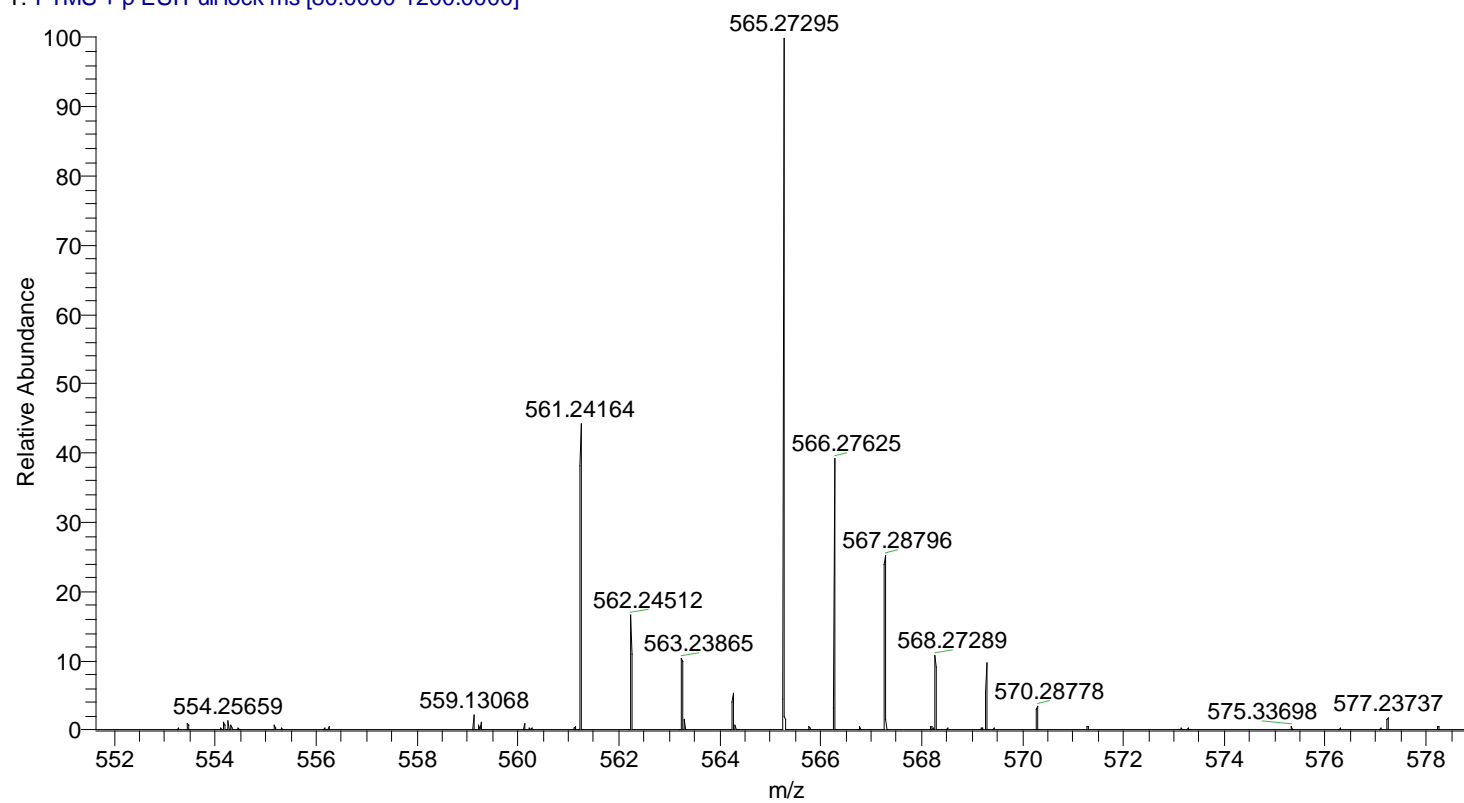

Figure S84. HRMS spectrum of compound TE-I-9.

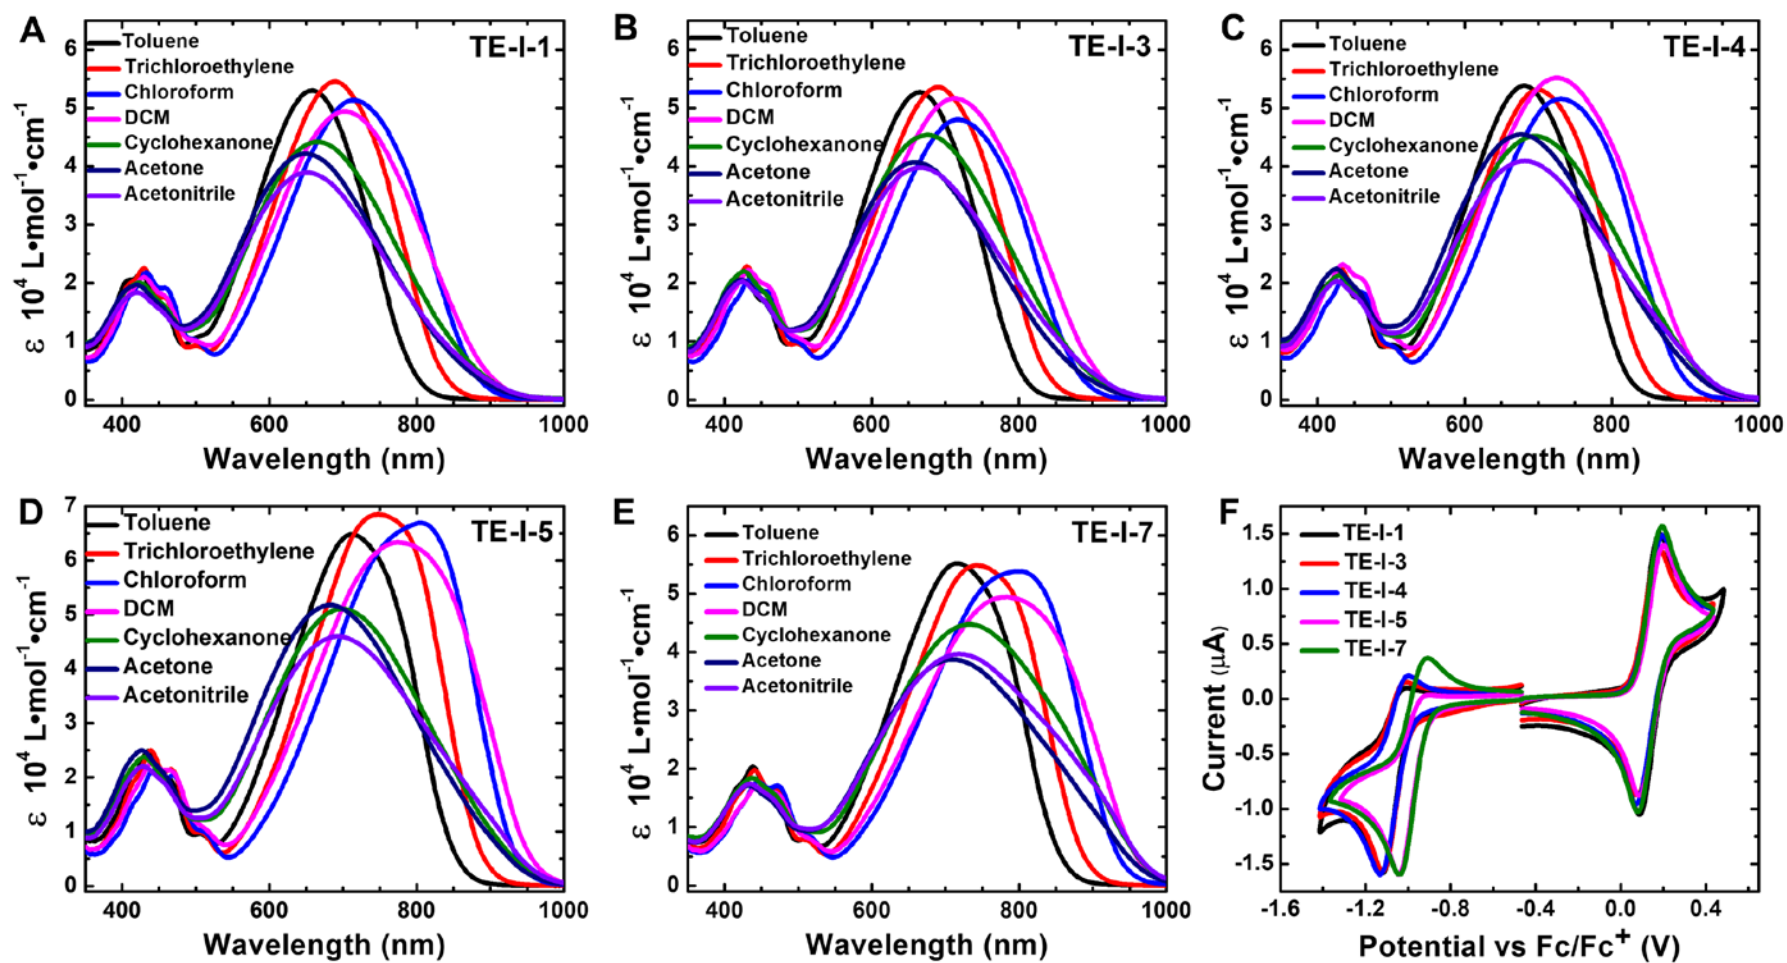

**Figure S85.** A-E, UV-vis-NIR spectra of Type-I chromophores recorded in solvents of different polarities. F, Cyclic voltammograms of Type-I chromophores in degassed anhydrous DCM solutions containing 0.1 M tetra-butylammonium hexafluorophosphate (TBAPF) as the supporting electrolyte.

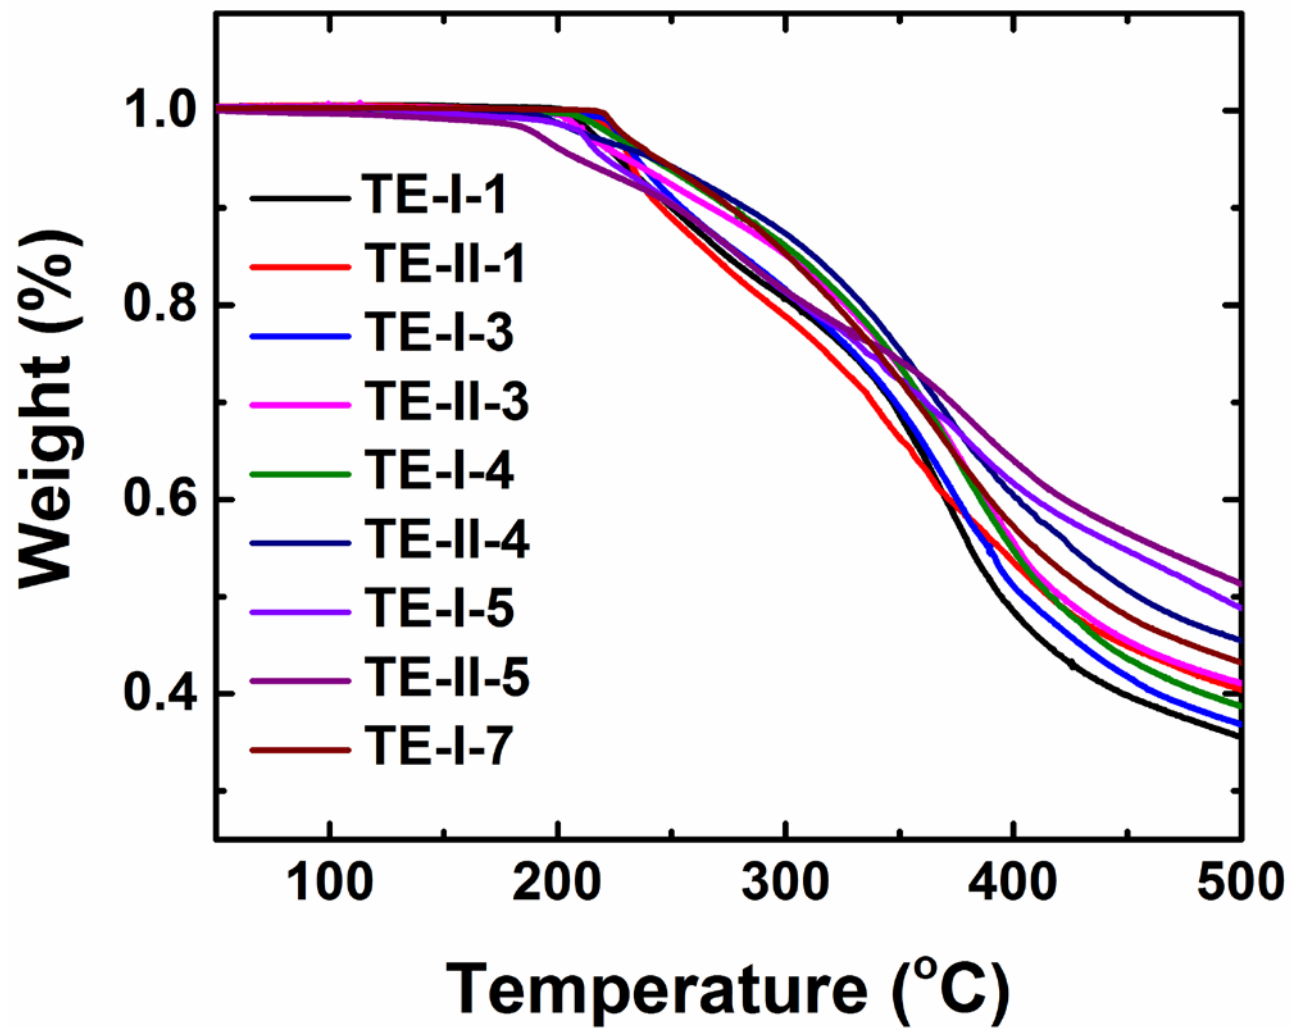

**Figure S86.** Thermogravimetric analysis of chromophores TE-I-1, TE-II-1, TE-I-3, TE-II-3, TE-I-4, TE-II-4, TE-I-5, TE-II-5, and TE-I-7.

## 5. X-ray crystallography

X-ray reflections were collected on the 4-circle kappa diffractometer (Oxford GEMINI S Ultra) with a 92 nm diagonal Sapphire CCD detector and co-mounted Enhance (Mo) and Enhance (Cu) X-ray sources. The frames were integrated with the Bruker SAINT software package using a narrow-frame algorithm. Data were corrected for absorption effects using the Multi-Scan method (SADABS). The structure was solved and refined using the Bruker SHELXTL software Package.

The crystal for **TE-II-1** has been grown by slow evaporation of CHCl<sub>3</sub> and EtOH.

**Table S7.** Crystallographic Data for Chromophore **TE-II-1**.

| <b>Compound</b>                              | <b>TE-II-1</b>                                                   |
|----------------------------------------------|------------------------------------------------------------------|
| Chemical formula                             | C <sub>43</sub> H <sub>51</sub> ClN <sub>4</sub> O <sub>2</sub>  |
| Formula weight                               | 691.32 g/mol                                                     |
| Temperature                                  | 173(2) K                                                         |
| Crystal system                               | monoclinic                                                       |
| Space group                                  | C 1 2/c 1                                                        |
| Unit cell dimension                          |                                                                  |
| a                                            | 30.3974(8) Å                                                     |
| b                                            | 15.2528(4) Å                                                     |
| c                                            | 22.3991(9) Å                                                     |
| α                                            | 90°                                                              |
| β                                            | 131.8510(10)°                                                    |
| γ                                            | 90°                                                              |
| Volume                                       | 7735.8(4) Å <sup>3</sup>                                         |
| Z                                            | 8                                                                |
| Density (calculated)                         | 1.187 g/cm <sup>3</sup>                                          |
| Absorption coefficient                       | 1.183 mm <sup>-1</sup>                                           |
| θ range for data collection                  | 3.49-74.55°                                                      |
| Reflections collected                        | 32612                                                            |
| Independent reflections                      | 7878 ( <i>R</i> <sub>int</sub> = 0.0987)                         |
| Data/restraints/parameters                   | 7878/168/498                                                     |
| Goodness of fit on F <sup>2</sup>            | 1.143                                                            |
| Final R indices [ <i>I</i> > 2σ( <i>I</i> )] | <i>R</i> <sub>1</sub> = 0.0974, w <i>R</i> <sub>2</sub> = 0.2699 |
| R indices (all data)                         | <i>R</i> <sub>1</sub> = 0.1141, w <i>R</i> <sub>2</sub> = 0.2964 |

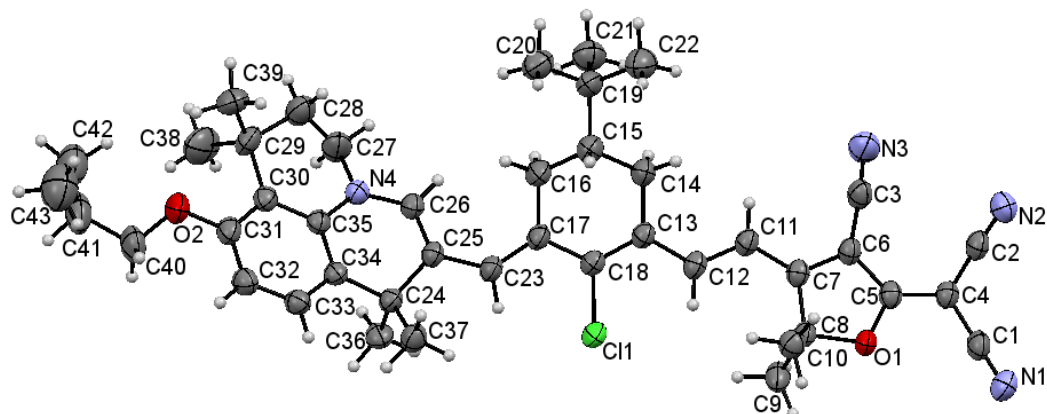

**Figure S87.** ORTEP drawings of chromophores **TE-II-1**. Ellipsoid contour percent probability level is 50%.

The crystal for **TE-II-2** has been grown by slow evaporation of  $\text{CHCl}_3$  and EtOH.

**Table S8.** Crystallographic Data for Chromophore **TE-II-2**.

| Compound                             | <b>TE-II-2</b>                                              |
|--------------------------------------|-------------------------------------------------------------|
| Chemical formula                     | $\text{C}_{40}\text{H}_{44}\text{Cl}_4\text{N}_4\text{O}_2$ |
| Formula weight                       | 754.59 g/mol                                                |
| Temperature                          | 213(2) K                                                    |
| Crystal system                       | triclinic                                                   |
| Space group                          | P -1                                                        |
| Unit cell dimension                  |                                                             |
| a                                    | 9.0000(2) Å                                                 |
| b                                    | 10.1845(2) Å                                                |
| c                                    | 22.4129(5) Å                                                |
| $\alpha$                             | 102.5470(10)°                                               |
| $\beta$                              | 92.9080(10)°                                                |
| $\gamma$                             | 106.7020(10)°                                               |
| Volume                               | 1906.59(7) Å <sup>3</sup>                                   |
| Z                                    | 2                                                           |
| Density (calculated)                 | 1.314 g/cm <sup>3</sup>                                     |
| Absorption coefficient               | 3.135 mm <sup>-1</sup>                                      |
| $\theta$ range for data collection   | 2.03-74.65°                                                 |
| Reflections collected                | 25539                                                       |
| Independent reflections              | 7731 ( $R_{\text{int}} = 0.0888$ )                          |
| Data/restraints/parameters           | 7731/132/505                                                |
| Goodness of fit on $F^2$             | 1.008                                                       |
| Final R indices [ $I > 2\sigma(I)$ ] | $R_1 = 0.0857$ , $wR_2 = 0.2457$                            |
| R indices (all data)                 | $R_1 = 0.1103$ , $wR_2 = 0.2803$                            |

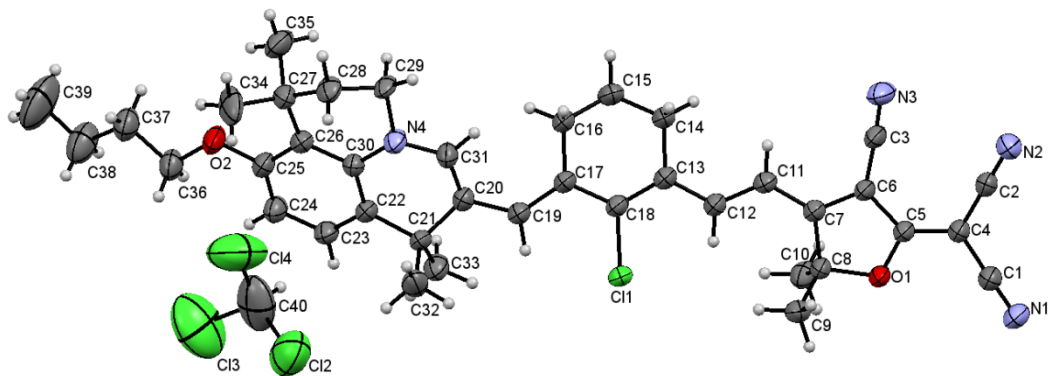

**Figure S88.** ORTEP drawings of chromophores **TE-II-2**. Ellipsoid contour percent probability level is 50%.

The crystal for **TE-I-6** has been grown by slow evaporation of  $\text{CHCl}_3$  and EtOH.

**Table S9.** Crystallographic Data for Chromophore **TE-I-6**.

| Compound                             | <b>TE-I-6</b>                                                         |
|--------------------------------------|-----------------------------------------------------------------------|
| Chemical formula                     | $\text{C}_{50}\text{H}_{48}\text{Cl}_4\text{F}_2\text{N}_4\text{O}_2$ |
| Formula weight                       | 916.72 g/mol                                                          |
| Temperature                          | 233(2) K                                                              |
| Crystal system                       | triclinic                                                             |
| Space group                          | P -1                                                                  |
| Unit cell dimension                  |                                                                       |
| a                                    | 9.9554(11) Å                                                          |
| b                                    | 15.264(2) Å                                                           |
| c                                    | 15.9425(19) Å                                                         |
| $\alpha$                             | 76.061(5)°                                                            |
| $\beta$                              | 83.579(4)°                                                            |
| $\gamma$                             | 84.782(5)°                                                            |
| Volume                               | 2331.4(5) Å <sup>3</sup>                                              |
| Z                                    | 2                                                                     |
| Density (calculated)                 | 1.306 g/cm <sup>3</sup>                                               |
| Absorption coefficient               | 0.306 mm <sup>-1</sup>                                                |
| $\theta$ range for data collection   | 2.35–26.43°                                                           |
| Reflections collected                | 29614                                                                 |
| Independent reflections              | 9556 ( $R_{\text{int}} = 0.0926$ )                                    |
| Data/restraints/parameters           | 9556/213/640                                                          |
| Goodness of fit on $F^2$             | 1.029                                                                 |
| Final R indices [ $I > 2\sigma(I)$ ] | $R_1 = 0.0666$ , $wR_2 = 0.1564$                                      |
| R indices (all data)                 | $R_1 = 0.1268$ , $wR_2 = 0.1953$                                      |

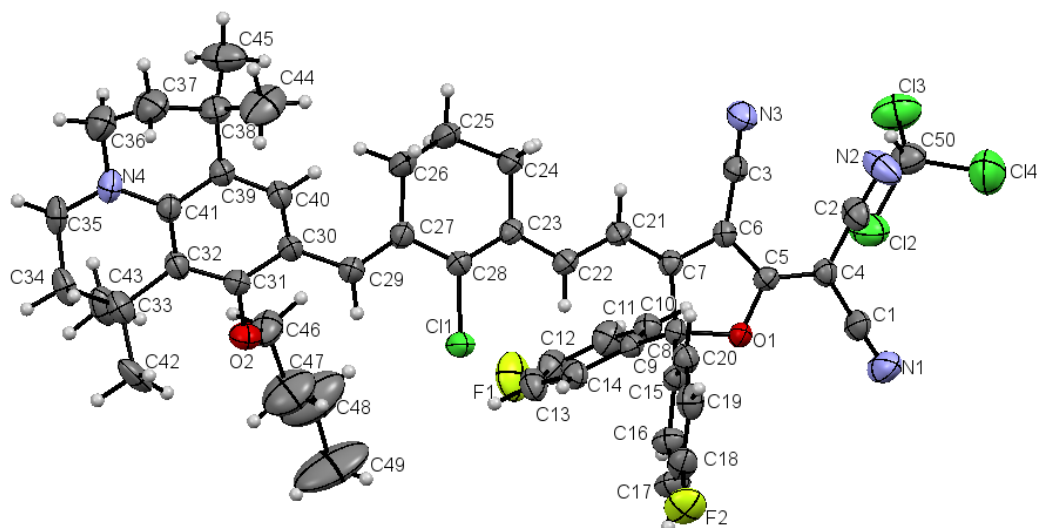

**Figure S89.** ORTEP drawings of chromophores **TE-I-6**. Ellipsoid contour percent probability level is 50%.

The crystal for **TE-II-6** has been grown by slow evaporation of  $\text{CHCl}_3$  and EtOH.

**Table S10.** Crystallographic Data for Chromophore **TE-II-6**.

| Compound                             | <b>TE-II-6</b>                                               |
|--------------------------------------|--------------------------------------------------------------|
| Chemical formula                     | $\text{C}_{49}\text{H}_{45}\text{ClF}_2\text{N}_4\text{O}_2$ |
| Formula weight                       | 795.34 g/mol                                                 |
| Temperature                          | 218(2) K                                                     |
| Crystal system                       | monoclinic                                                   |
| Space group                          | $C 1 2/c 1$                                                  |
| Unit cell dimension                  |                                                              |
| a                                    | 30.7033(7) Å                                                 |
| b                                    | 26.4439(6) Å                                                 |
| c                                    | 11.6452(3) Å                                                 |
| $\alpha$                             | 90°                                                          |
| $\beta$                              | 111.3770(10)°                                                |
| $\gamma$                             | 90°                                                          |
| Volume                               | 8804.4(4) Å <sup>3</sup>                                     |
| Z                                    | 8                                                            |
| Density (calculated)                 | 1.200 g/cm <sup>3</sup>                                      |
| Absorption coefficient               | 1.179 mm <sup>-1</sup>                                       |
| $\theta$ range for data collection   | 3.09–74.73°                                                  |
| Reflections collected                | 58974                                                        |
| Independent reflections              | 9041 ( $R_{\text{int}} = 0.0532$ )                           |
| Data/restraints/parameters           | 9041/372/603                                                 |
| Goodness of fit on $F^2$             | 1.062                                                        |
| Final R indices [ $I > 2\sigma(I)$ ] | $R_1 = 0.0533$ , $wR_2 = 0.1636$                             |
| R indices (all data)                 | $R_1 = 0.0594$ , $wR_2 = 0.1715$                             |



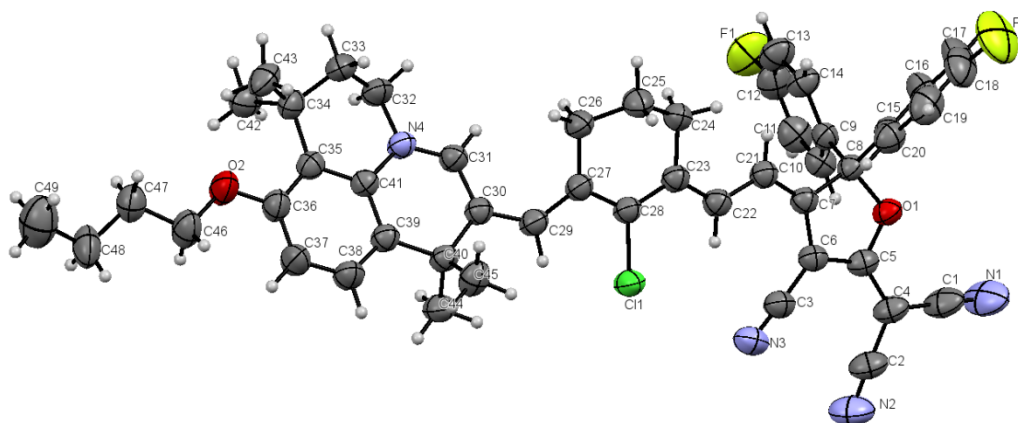

**Figure S90.** ORTEP drawings of chromophores **TE-II-6**. Ellipsoid contour percent probability level is 50%.

## 6. References

- (1) C. Lee, W. Yang and R. G. Parr, Development of the Colle-Salvetti correlation-energy formula into a functional of the electron density, *Phys. Rev. B*, 1988, **37**, 785–789.
- (2) A. D. Becke, Density-functional thermochemistry. III. The role of exact exchange. *J. Chem. Phys.*, 1993, **98**, 5648–5652.
- (3) S. Grimme, S. Ehrlich and L. Goerigk, Effect of the damping function in dispersion corrected density functional theory, *J. Comput. Chem.*, 2011, **32**, 1456–1465.
- (4) F. Weigend and R. Ahlrichs, Balanced basis sets of split valence, triple zeta valence and quadruple zeta valence quality for H to Rn: Design and assessment of Accuracy, *Phys. Chem. Chem. Phys.*, 2005, **7**, 3297–3305.
- (5) S. Miertuš and J. Tomasi, Approximate evaluations of the electrostatic free energy and internal energy changes in solution processes, *Chem. Phys.*, 1982, **65**, 239–245.
- (6) S. Miertuš, E. Scrocco and J. Tomasi, Electrostatic interaction of a solute with a continuum. A direct utilization of AB initio molecular potentials for the prevision of solvent effects, *Chem. Phys.*, 1981, **55**, 117–129.
- (7) J. Zheng, X. Xu and D. G. Truhlar, Minimally augmented Karlsruhe basis sets, *Theor. Chem. Acc.*, 2011, **128**, 295–305.
- (8) Gaussian 16, Revision C.01, M. J. Frisch, G. W. Trucks, H. B. Schlegel, G. E. Scuseria, M. A. Robb, J. R. Cheeseman, G. Scalmani, V. Barone, G. A. Petersson, H. Nakatsuji, X. Li, M. Caricato, A. V. Marenich, J. Bloino, B. G. Janesko, R. Gomperts, B. Mennucci, H. P. Hratchian, J. V. Ortiz, A. F. Izmaylov, J. L. Sonnenberg, D. Williams-Young, F. Ding, F. Lipparini, F. Egidi, J. Goings, B. Peng, A. Petrone, T. Henderson, D. Ranasinghe, V. G. Zakrzewski, J. Gao, N. Rega, G. Zheng, W. Liang, M. Hada, M. Ehara, K. Toyota, R. Fukuda, J. Hasegawa, M. Ishida, T. Nakajima, Y. Honda, O. Kitao, H. Nakai, T. Vreven, K. Throssell, J. A. Montgomery, Jr., J. E. Peralta, F. Ogliaro, M. J. Bearpark, J. J. Heyd, E. N. Brothers, K. N. Kudin, V. N. Staroverov, T. A. Keith, R. Kobayashi, J. Normand, K. Raghavachari, A. P. Rendell, J. C. Burant, S. S. Iyengar, J. Tomasi, M. Cossi, J. M. Millam, M. Klene, C. Adamo, R. Cammi, J. W. Ochterski, R. L. Martin, K. Morokuma, O. Farkas, J. B. Foresman, and D. J. Fox, Gaussian, Inc., Wallingford CT,

2016.

(9) H. Sun, Z. Li, J. Wu, Z. Jiang, J. Luo and A. K.-Y. Jen, Design, synthesis, and properties of nonlinear optical chromophores based on a verbenone bridge with a novel dendritic acceptor, *J. Mater. Chem. C*, 2018, **6**, 2840-2847.

(10) D. Zhang, J. Zou, W. Chen, S.-M. Yiu, M.-K. Tse, J. Luo and A. K.-Y. Jen, Efficient, stable, and scalable push-pull heptamethines for electro-optics, *Chem. Mater.*, 2022, **34**, 3683-3693.

(11) W. Chen, T. Liu, J. Zou, D. Zhang, M. K. Tse, S. W. Tsang, J. Luo and A. K. Y. Jen, Push-pull heptamethines near the cyanine limit exhibiting large quadratic electro-optic effect, *Adv. Mater.*, Accepted Articles, <https://doi.org/10.1002/adma.202306089>.

(12) L. Han, S.-B. Dai, Y.-J. Li, Q. Ye and Y.-H. Cui, Synthesis and application of julolidine derivatives, CN112961151A, 2021.

(13) D. Zhang, J. Zou, W. Wang, Q. Yu, G. Deng, J. Wu, Z.-A. Li and J. Luo, Systematic study of the structure-property relationship of a series of near-infrared absorbing push-pull heptamethine chromophores for electro-optics, *Sci. China Chem.*, 2021, **64**, 263-273.
