# Supplementary material for: From byproducts to NLO-active dyes: catalyst-free transfer hydrogenation in the modular synthesis of merocyanines
Source: Royal Society of Chemistry journal article supplement (doi:10.1039/d4nj00820k), 2024-01-01
Supplement: d4nj00820k2.pdf [file d4nj00820k2.pdf]

## Supporting Information for

From byproducts to NLO-active dyes: catalyst-free transfer hydrogenation in the modular synthesis of merocyanines

Jie Zou,<sup>‡1,2,3</sup> Yi Pan,<sup>‡2</sup> Di Zhang,<sup>1,2,3</sup> Jie Zhang,<sup>1,2</sup> Weilong Chen,<sup>1,2,3</sup> Hongyan Sun,<sup>1,2</sup>

Kai-Chung Lau,<sup>2\*</sup> and Jingdong Luo<sup>1,2,3\*</sup>

<sup>1</sup> Shenzhen Research Institute, City University of Hong Kong, Shenzhen 518057, China

<sup>2</sup> Department of Chemistry, City University of Hong Kong, Kowloon, Hong Kong SAR, China

<sup>3</sup> Hong Kong Institute for Clean Energy, City University of Hong Kong, Kowloon, Hong Kong SAR, China

**Table.** Cartesian coordinates for the optimized geometries at B3LYP-D3(BJ)/ma-TZVP level.

### TCF1-based (Path I)

#### JD1'

|   |             |             |             |
|---|-------------|-------------|-------------|
| O | 2.77731800  | 1.49763900  | -0.10614600 |
| N | -0.86644000 | -1.62654800 | 0.05485100  |
| C | -2.84089500 | 0.54927200  | 0.08190100  |
| C | -3.15711500 | -0.91072000 | 0.42580000  |
| C | -2.24935900 | -1.86293800 | -0.31660200 |
| H | -2.38815100 | -1.76602000 | -1.40430700 |
| C | 0.04819300  | -2.67440800 | -0.35007200 |
| H | -0.42391200 | -3.63352200 | -0.13397100 |
| H | 0.23237700  | -2.64279900 | -1.43520200 |
| C | 1.33432100  | -2.53074200 | 0.42282700  |
| H | 2.01655400  | -3.35051000 | 0.18857500  |
| H | 1.09705200  | -2.59886000 | 1.48771500  |
| C | 2.03895900  | -1.19538200 | 0.13544200  |
| C | 1.00444500  | -0.05944500 | 0.05375200  |
| C | 1.42959100  | 1.27932200  | -0.03097700 |
| C | 0.52313800  | 2.33365600  | -0.05258400 |
| H | 0.85549500  | 3.35749400  | -0.11443200 |
| C | -0.83199000 | 2.05217800  | 0.00486300  |
| H | -1.52613300 | 2.88183600  | -0.00631200 |
| C | -1.32435600 | 0.75960100  | 0.05546000  |
| C | -0.39405700 | -0.31429800 | 0.04945600  |
| C | -3.43602500 | 0.90072200  | -1.29460900 |
| H | -3.21383200 | 1.93570700  | -1.55803200 |
| H | -4.52203900 | 0.77694500  | -1.28237600 |
| H | -3.02740300 | 0.26490700  | -2.08071800 |
| C | -3.50618300 | 1.43792500  | 1.14546800  |
| H | -3.41213700 | 2.49868500  | 0.91333300  |
| H | -3.06371400 | 1.26322900  | 2.12765000  |
| H | -4.57256400 | 1.20732700  | 1.20490400  |
| C | 2.80691300  | -1.31872300 | -1.19496000 |
| H | 3.30190200  | -0.38484200 | -1.45109600 |
| H | 2.13407000  | -1.58238500 | -2.01225400 |
| H | 3.56546100  | -2.10178700 | -1.11421100 |
| C | 3.03932200  | -0.98765300 | 1.29044000  |
| H | 2.50724600  | -0.80678700 | 2.22668300  |
| H | 3.63525500  | -1.89554200 | 1.41382900  |
| H | 3.71283300  | -0.15611800 | 1.11069300  |
| C | 3.25635100  | 2.83029300  | -0.19267700 |
| H | 2.97130500  | 3.41628400  | 0.68466500  |

|   |             |             |             |
|---|-------------|-------------|-------------|
| H | 2.89099900  | 3.32917500  | -1.09385100 |
| H | -2.48830400 | -2.89528000 | -0.05780500 |
| H | -3.02117700 | -1.07165600 | 1.49867800  |
| H | -4.20219500 | -1.12632300 | 0.19345200  |
| H | 4.34003300  | 2.75361600  | -0.23796500 |

#### TCF-A2

|    |             |             |             |
|----|-------------|-------------|-------------|
| Cl | -2.65512000 | -1.94412800 | 0.17497700  |
| O  | 3.89157900  | -1.43444000 | -0.00780000 |
| N  | 7.31015700  | -2.05366600 | -0.07591200 |
| N  | 6.87207900  | 2.29134700  | -0.12679100 |
| N  | 3.43428700  | 3.30330400  | -0.08188700 |
| C  | 6.60341500  | -1.13983900 | -0.07403200 |
| C  | 6.34458900  | 1.26396700  | -0.10237700 |
| C  | 3.40901700  | 2.14989300  | -0.05902000 |
| C  | 5.74490300  | -0.01473900 | -0.07215000 |
| C  | 4.37355300  | -0.19819900 | -0.03905200 |
| C  | 3.29911700  | 0.74471100  | -0.03037300 |
| C  | 2.09499300  | 0.05793400  | 0.01156200  |
| C  | 2.41600200  | -1.42242100 | 0.02759000  |
| C  | 1.95682200  | -2.16053100 | -1.22386200 |
| H  | 0.87173900  | -2.23228500 | -1.25084700 |
| H  | 2.37101800  | -3.16792600 | -1.21754100 |
| H  | 2.29373000  | -1.64108100 | -2.11994400 |
| C  | 2.01892800  | -2.12009500 | 1.32244800  |
| H  | 0.93663900  | -2.19209200 | 1.40305000  |
| H  | 2.39623600  | -1.57122500 | 2.18406500  |
| H  | 2.43523300  | -3.12657500 | 1.32917900  |
| C  | 0.82427400  | 0.65709300  | 0.03463300  |
| H  | 0.81828100  | 1.73864800  | 0.00950800  |
| C  | -0.36628300 | -0.02185900 | 0.07972000  |
| H  | -0.34185400 | -1.09935900 | 0.09484600  |
| C  | -1.65071600 | 0.57131300  | 0.08628900  |
| C  | -1.77813600 | 2.07999200  | 0.07191800  |
| H  | -1.59499100 | 2.44323000  | -0.94514200 |
| H  | -0.99339900 | 2.50788200  | 0.69662800  |
| C  | -3.13625700 | 2.56338700  | 0.56002100  |
| H  | -3.22500000 | 2.37472900  | 1.63335400  |
| C  | -4.25701500 | 1.84049500  | -0.17246600 |
| H  | -4.23281100 | 2.10470500  | -1.23527000 |
| H  | -5.23178100 | 2.14699100  | 0.20373000  |
| C  | -4.11763600 | 0.34308800  | -0.03084400 |
| C  | -2.79846600 | -0.19504700 | 0.07682400  |
| C  | -5.21891000 | -0.45273500 | -0.03053600 |
| H  | -5.15569900 | -1.52871800 | 0.06839900  |
| H  | -3.22121400 | 3.64060300  | 0.41316400  |
| O  | -6.43426800 | 0.06344600  | -0.16104600 |
| C  | -7.54330300 | -0.87069800 | -0.11340100 |
| H  | -7.40497500 | -1.60547000 | -0.90880300 |
| H  | -7.51692300 | -1.38235500 | 0.85057500  |
| C  | -8.81962000 | -0.08892600 | -0.29375300 |
| H  | -8.93991300 | 0.64779600  | 0.50104900  |
| H  | -8.82793200 | 0.42517400  | -1.25531400 |
| H  | -9.66910800 | -0.77214500 | -0.26124600 |

#### INT-I-A

|    |             |             |             |
|----|-------------|-------------|-------------|
| Cl | -0.43507900 | -2.70403900 | 0.41737700  |
| O  | 5.89944100  | -1.07267100 | 0.63277100  |
| N  | 9.26164700  | -0.78623900 | 1.45694700  |
| N  | 8.52055000  | 2.21834800  | -1.62212500 |
| N  | 5.09597300  | 2.21243700  | -2.71762400 |
| C  | 8.50832600  | -0.28522800 | 0.73822000  |
| C  | 8.08225500  | 1.37361600  | -0.96702300 |
| C  | 5.16283200  | 1.38235200  | -1.91840800 |
| C  | 7.59318900  | 0.33454800  | -0.14501100 |
| C  | 6.27420800  | -0.08780100 | -0.17517500 |
| C  | 5.16308700  | 0.35510900  | -0.95393500 |
| C  | 4.04249800  | -0.39210900 | -0.61164000 |

|   |             |             |             |
|---|-------------|-------------|-------------|
| C | 4.46610600  | -1.37926700 | 0.45730500  |
| C | 4.39670400  | -2.83231800 | 0.00471900  |
| H | 3.36224700  | -3.14858100 | -0.11020200 |
| H | 4.87236700  | -3.46463700 | 0.75328400  |
| H | 4.90758400  | -2.96026600 | -0.94857500 |
| C | 3.81428400  | -1.13656300 | 1.81280800  |
| H | 2.75913100  | -1.39766200 | 1.78590400  |
| H | 3.90450200  | -0.09021000 | 2.10031400  |
| H | 4.30571100  | -1.75707800 | 2.56116200  |
| C | 2.76639200  | -0.23623100 | -1.17029900 |
| H | 2.67813400  | 0.52712600  | -1.93176400 |
| C | 1.65730400  | -0.96254400 | -0.81095000 |
| H | 1.76926600  | -1.72030400 | -0.05285800 |
| C | 0.36309100  | -0.81339400 | -1.35136400 |
| C | 0.12119000  | 0.20509200  | -2.44483000 |
| H | 0.51652100  | -0.18777200 | -3.38782200 |
| H | 0.69752400  | 1.10468800  | -2.22338600 |
| C | -1.34652600 | 0.57385900  | -2.60106300 |
| H | -1.66297800 | 1.16764400  | -1.74220900 |
| C | -2.21044800 | -0.67490600 | -2.69618800 |
| H | -1.97149200 | -1.22449900 | -3.61339700 |
| H | -3.26539700 | -0.41413700 | -2.75487000 |
| C | -1.99040100 | -1.57436500 | -1.50421900 |
| C | -0.69396800 | -1.59196700 | -0.91606800 |
| C | -2.99477000 | -2.36087100 | -1.03467700 |
| H | -2.87145700 | -2.99798300 | -0.16985100 |
| H | -1.47922700 | 1.19300000  | -3.48946500 |
| O | -1.68626300 | -0.75058300 | 3.25236100  |
| N | -2.52292900 | 2.71456300  | 0.03403900  |
| C | -5.19586100 | 1.67240200  | -0.50974100 |
| C | -4.44782200 | 2.59479300  | -1.47504300 |
| C | -3.47213200 | 3.48733400  | -0.74570500 |
| H | -4.00777100 | 4.20457900  | -0.10711500 |
| C | -1.41439500 | 3.49808200  | 0.53608400  |
| H | -1.07930900 | 4.15389600  | -0.26946900 |
| H | -1.73581800 | 4.15092600  | 1.36114000  |
| C | -0.29122000 | 2.59299200  | 0.96923400  |
| H | 0.54473600  | 3.18961500  | 1.33969800  |
| H | 0.06792600  | 2.03865200  | 0.09828700  |
| C | -0.71745100 | 1.59722900  | 2.05594400  |
| C | -2.05169700 | 0.94605800  | 1.65123000  |
| C | -2.49503300 | -0.22804600 | 2.28381900  |
| C | -3.71418500 | -0.81591200 | 1.96671900  |
| C | -4.53501000 | -0.19126100 | 1.04211600  |
| H | -5.49763400 | -0.63530300 | 0.83236600  |
| C | -4.18420500 | 0.98438400  | 0.40680200  |
| C | -2.91768700 | 1.56094400  | 0.70293200  |
| C | -6.17996000 | 2.48883900  | 0.35118300  |
| H | -6.73242700 | 1.82766300  | 1.02065700  |
| H | -6.89896600 | 3.01445300  | -0.28309400 |
| H | -5.66431800 | 3.22483000  | 0.96795200  |
| C | -6.00400300 | 0.67069400  | -1.34565400 |
| H | -6.66655200 | 0.06111200  | -0.73118600 |
| H | -5.34884000 | 0.00162000  | -1.90215600 |
| H | -6.63045800 | 1.21198300  | -2.05804300 |
| C | -0.90421400 | 2.33359400  | 3.39636100  |
| H | -1.20712800 | 1.63334200  | 4.17427400  |
| H | -1.66677700 | 3.10975500  | 3.32586300  |
| H | 0.03494600  | 2.80277700  | 3.70243400  |
| C | 0.46126600  | 0.61437000  | 2.19382800  |
| H | 0.47967100  | -0.08359900 | 1.36114800  |
| H | 1.39445900  | 1.18189900  | 2.17597900  |
| H | 0.42577600  | 0.04294300  | 3.11444300  |
| C | -2.03659500 | -1.98961500 | 3.84559900  |
| H | -2.12450600 | -2.77877200 | 3.09500100  |
| H | -2.97265300 | -1.91718200 | 4.40539500  |
| H | -2.89953900 | 4.07878100  | -1.46297900 |
| H | -3.90410800 | 1.98986600  | -2.20403300 |
| H | -5.15950900 | 3.20947500  | -2.03033500 |
| H | -4.04101400 | -1.72400400 | 2.44728600  |
| O | -4.17495600 | -2.39177500 | -1.63517900 |

|   |             |             |             |
|---|-------------|-------------|-------------|
| C | -5.18990800 | -3.22660100 | -1.02378300 |
| H | -4.77801500 | -4.22963800 | -0.89788200 |
| H | -5.41916500 | -2.81369100 | -0.04037500 |
| C | -6.39901000 | -3.23027800 | -1.92415100 |
| H | -6.79379500 | -2.22238200 | -2.04909900 |
| H | -6.15118700 | -3.63593000 | -2.90546500 |
| H | -7.17710800 | -3.85264000 | -1.48059600 |
| H | -1.22687900 | -2.23129600 | 4.53009500  |

#### TS-I-A

|    |             |             |             |
|----|-------------|-------------|-------------|
| Cl | -0.59378800 | -2.70806300 | 0.01178700  |
| O  | 5.69327500  | -0.99465000 | 0.70281700  |
| N  | 8.98199300  | -0.80121500 | 1.75991500  |
| N  | 8.63644600  | 2.01740500  | -1.55355200 |
| N  | 5.25909700  | 2.05466400  | -2.92557000 |
| C  | 8.31138700  | -0.31621100 | 0.94957000  |
| C  | 8.11000200  | 1.23600400  | -0.88048900 |
| C  | 5.25106900  | 1.28740000  | -2.05853200 |
| C  | 7.50623200  | 0.28173400  | -0.04058300 |
| C  | 6.15619300  | -0.07955900 | -0.15674700 |
| C  | 5.14431700  | 0.34284900  | -1.02882100 |
| C  | 3.93353600  | -0.34448500 | -0.71199700 |
| C  | 4.26257500  | -1.26112500 | 0.45526500  |
| C  | 4.16333600  | -2.74249500 | 0.11606000  |
| H  | 3.12664500  | -3.03107400 | -0.04582500 |
| H  | 4.56356000  | -3.33396800 | 0.93953000  |
| H  | 4.72915200  | -2.96306000 | -0.78842300 |
| C  | 3.53668400  | -0.89261600 | 1.74212400  |
| H  | 2.47445200  | -1.10837100 | 1.65805100  |
| H  | 3.65645600  | 0.16875500  | 1.95649900  |
| H  | 3.94305300  | -1.47204500 | 2.57108500  |
| C  | 2.72916500  | -0.18488000 | -1.33859500 |
| H  | 2.70848500  | 0.53037600  | -2.15105800 |
| C  | 1.52942700  | -0.85802700 | -1.00307300 |
| H  | 1.58521200  | -1.59523500 | -0.21809500 |
| C  | 0.29618600  | -0.65709100 | -1.55983000 |
| C  | 0.06493600  | 0.34274400  | -2.66920200 |
| H  | 0.15268000  | -0.16752500 | -3.63529400 |
| H  | 0.83871100  | 1.10788900  | -2.64929700 |
| C  | -1.30604600 | 0.99733400  | -2.56318600 |
| H  | -1.34098200 | 1.58246300  | -1.64348900 |
| C  | -2.40944400 | -0.04922800 | -2.53861700 |
| H  | -2.50385400 | -0.51655800 | -3.52526400 |
| H  | -3.37449500 | 0.40982200  | -2.33353100 |
| C  | -2.14435400 | -1.12844500 | -1.51737100 |
| C  | -0.86474100 | -1.37529600 | -1.11377000 |
| C  | -3.27085300 | -1.88245600 | -1.01406000 |
| H  | -3.04607000 | -2.83550700 | -0.55190700 |
| H  | -1.46097600 | 1.68742500  | -3.39383700 |
| O  | -2.64513600 | -1.86793900 | 2.47568500  |
| N  | -1.76659400 | 2.51473600  | 0.84784400  |
| C  | -4.45129700 | 2.74905400  | -0.17225300 |
| C  | -3.32563800 | 3.60085200  | -0.76194000 |
| C  | -2.18843100 | 3.76917000  | 0.21712400  |
| H  | -2.45603900 | 4.47347300  | 1.01038800  |
| C  | -0.44886200 | 2.62564500  | 1.46912100  |
| H  | 0.21835300  | 3.08347300  | 0.73744500  |
| H  | -0.52595600 | 3.32396600  | 2.30817700  |
| C  | 0.09401400  | 1.29463600  | 1.91544200  |
| H  | 0.96449700  | 1.47063900  | 2.54859000  |
| H  | 0.43124300  | 0.72318000  | 1.04862600  |
| C  | -0.95045300 | 0.46657800  | 2.67807700  |
| C  | -2.13298400 | 0.28335900  | 1.71815600  |
| C  | -2.90519700 | -0.85806800 | 1.62684000  |
| C  | -3.95577500 | -0.98069800 | 0.65020500  |
| C  | -4.48420600 | 0.25513000  | 0.14724400  |
| H  | -5.41989600 | 0.20702600  | -0.38818300 |
| C  | -3.84159600 | 1.43276400  | 0.28350700  |
| C  | -2.54277500 | 1.42361600  | 0.94102300  |

|   |             |             |             |
|---|-------------|-------------|-------------|
| C | -5.06976300 | 3.44526000  | 1.05701600  |
| H | -5.90687900 | 2.85805500  | 1.43606100  |
| H | -5.43704900 | 4.43727900  | 0.78562100  |
| H | -4.35196300 | 3.55791300  | 1.86988700  |
| C | -5.53707800 | 2.56772200  | -1.23490000 |
| H | -6.40165900 | 2.02759400  | -0.84880500 |
| H | -5.15818900 | 2.03366500  | -2.10762100 |
| H | -5.88530100 | 3.54820200  | -1.56341500 |
| C | -1.44905600 | 1.22223300  | 3.92510600  |
| H | -2.14893300 | 0.59817300  | 4.48212100  |
| H | -1.96315700 | 2.14903100  | 3.66949400  |
| H | -0.60992000 | 1.46558900  | 4.58116200  |
| C | -0.23201300 | -0.80820900 | 3.14338600  |
| H | 0.03406000  | -1.44865400 | 2.30597400  |
| H | 0.68795300  | -0.50874300 | 3.64989500  |
| H | -0.82771400 | -1.38955900 | 3.83956300  |
| C | -3.42399900 | -3.06218900 | 2.46004400  |
| H | -3.35357900 | -3.57439000 | 1.50106300  |
| H | -4.46869100 | -2.85598400 | 2.69791400  |
| H | -1.31493300 | 4.18125500  | -0.28788600 |
| H | -2.96310500 | 3.13255300  | -1.67791300 |
| H | -3.70068300 | 4.58941800  | -1.03161000 |
| H | -4.70353300 | -1.73136000 | 0.86539500  |
| O | -4.33835800 | -1.90275400 | -1.84687600 |
| C | -5.34148700 | -2.90072800 | -1.58831200 |
| H | -4.84804500 | -3.86543900 | -1.44375400 |
| H | -5.87262500 | -2.64382500 | -0.66817200 |
| C | -6.28738300 | -2.92999400 | -2.76421100 |
| H | -6.76202000 | -1.95780900 | -2.90133300 |
| H | -5.75923300 | -3.19555400 | -3.68036000 |
| H | -7.06738000 | -3.67137200 | -2.58691200 |
| H | -2.99586600 | -3.69420900 | 3.23266300  |

#### INT-I-B

|    |             |             |             |
|----|-------------|-------------|-------------|
| Cl | -0.62242900 | -2.68550000 | 0.11125300  |
| O  | 5.66386800  | -0.95723000 | 0.76540800  |
| N  | 8.92753100  | -0.70913500 | 1.87775600  |
| N  | 8.66651600  | 1.91083800  | -1.60121300 |
| N  | 5.29418900  | 1.89660900  | -3.02583500 |
| C  | 8.27591800  | -0.26955200 | 1.02606900  |
| C  | 8.12208900  | 1.17264700  | -0.89347800 |
| C  | 5.27584500  | 1.17366100  | -2.12061800 |
| C  | 7.49566000  | 0.27274700  | -0.01304500 |
| C  | 6.14245900  | -0.09000300 | -0.13819800 |
| C  | 5.15190300  | 0.28438800  | -1.04679900 |
| C  | 3.92529100  | -0.38626500 | -0.71327200 |
| C  | 4.23807600  | -1.24004000 | 0.50667300  |
| C  | 4.14701900  | -2.73639700 | 0.23915200  |
| H  | 3.11446900  | -3.03154400 | 0.06239500  |
| H  | 4.52437600  | -3.28857600 | 1.10012000  |
| H  | 4.73639000  | -2.99981000 | -0.63853500 |
| C  | 3.49158200  | -0.81386600 | 1.76374400  |
| H  | 2.43303900  | -1.04871500 | 1.68059700  |
| H  | 3.59559300  | 0.25881000  | 1.92321100  |
| H  | 3.89551500  | -1.34298800 | 2.62704100  |
| C  | 2.73812400  | -0.26277700 | -1.36495100 |
| H  | 2.73167400  | 0.40223100  | -2.21968800 |
| C  | 1.51922300  | -0.91150000 | -1.00636500 |
| H  | 1.56134800  | -1.59510100 | -0.17313400 |
| C  | 0.30263600  | -0.74399100 | -1.58850800 |
| C  | 0.07622300  | 0.17285100  | -2.76667000 |
| H  | 0.10049000  | -0.41736400 | -3.69017700 |
| H  | 0.88247400  | 0.89995800  | -2.83909600 |
| C  | -1.26416400 | 0.89218800  | -2.66935100 |
| H  | -1.24964200 | 1.54274200  | -1.79262100 |
| C  | -2.40371400 | -0.10777400 | -2.54244200 |
| H  | -2.53379100 | -0.64384900 | -3.48890100 |
| H  | -3.34816900 | 0.40088900  | -2.36296900 |
| C  | -2.15465000 | -1.12139500 | -1.45209200 |

|   |             |             |             |
|---|-------------|-------------|-------------|
| C | -0.88835900 | -1.40778300 | -1.08750500 |
| C | -3.34710800 | -1.77531400 | -0.82220300 |
| H | -3.07314600 | -2.75837700 | -0.44411800 |
| H | -1.41743000 | 1.52868000  | -3.54221100 |
| O | -2.82255100 | -1.81656200 | 2.42281600  |
| N | -1.66933500 | 2.47531300  | 0.80212700  |
| C | -4.33416800 | 2.87635000  | -0.20578100 |
| C | -3.16458100 | 3.65354300  | -0.81626700 |
| C | -1.99864600 | 3.74667700  | 0.13862400  |
| H | -2.18936100 | 4.47988100  | 0.92611200  |
| C | -0.34678200 | 2.51547800  | 1.43508400  |
| H | 0.35684800  | 2.87114900  | 0.68218800  |
| H | -0.38652800 | 3.27442900  | 2.22051100  |
| C | 0.08326300  | 1.17858700  | 1.97831400  |
| H | 0.93501800  | 1.33548900  | 2.64069500  |
| H | 0.41845000  | 0.53909400  | 1.16025600  |
| C | -1.04752700 | 0.46442800  | 2.73551600  |
| C | -2.17827600 | 0.29884000  | 1.71369900  |
| C | -2.95825100 | -0.81523300 | 1.55484100  |
| C | -3.92944100 | -0.94095000 | 0.43417900  |
| C | -4.43117300 | 0.37090900  | -0.02785300 |
| H | -5.34074500 | 0.35170800  | -0.60738300 |
| C | -3.79347900 | 1.51890900  | 0.20491000  |
| C | -2.49668400 | 1.44536600  | 0.89577900  |
| C | -4.87091000 | 3.58850700  | 1.05160900  |
| H | -5.73288400 | 3.04950800  | 1.44566600  |
| H | -5.18222800 | 4.60468800  | 0.80294100  |
| H | -4.12717000 | 3.64667500  | 1.84655400  |
| C | -5.45695300 | 2.77896800  | -1.23847000 |
| H | -6.33279600 | 2.26670900  | -0.83953200 |
| H | -5.12977500 | 2.25661100  | -2.13867900 |
| H | -5.76750300 | 3.78443100  | -1.52551300 |
| C | -1.55749800 | 1.32182800  | 3.90911200  |
| H | -2.32859600 | 0.77987100  | 4.45762600  |
| H | -1.98859900 | 2.26769700  | 3.58063900  |
| H | -0.73859700 | 1.54223600  | 4.59727200  |
| C | -0.44339800 | -0.82539700 | 3.30643100  |
| H | -0.15635300 | -1.51891200 | 2.51957800  |
| H | 0.45400300  | -0.55458300 | 3.86636500  |
| H | -1.12229200 | -1.33576200 | 3.98257400  |
| C | -3.61783200 | -3.00545800 | 2.36546200  |
| H | -3.42686200 | -3.56842400 | 1.45428000  |
| H | -4.67862100 | -2.77276700 | 2.45548500  |
| H | -1.10016700 | 4.06986000  | -0.38527100 |
| H | -2.85271900 | 3.16391100  | -1.73994700 |
| H | -3.47751700 | 4.66547900  | -1.07709100 |
| H | -4.78406500 | -1.52965700 | 0.76805200  |
| O | -4.36769300 | -1.90231400 | -1.78402600 |
| C | -5.30008500 | -2.95646400 | -1.54115100 |
| H | -4.75471200 | -3.90082600 | -1.43552200 |
| H | -5.84134500 | -2.77621800 | -0.60564600 |
| C | -6.26524300 | -3.01182900 | -2.70276800 |
| H | -6.80765800 | -2.07025000 | -2.79850800 |
| H | -5.73512100 | -3.20551000 | -3.63605900 |
| H | -6.98997000 | -3.81166100 | -2.54444700 |
| H | -3.30366100 | -3.59417000 | 3.22169300  |

#### TS-I-B

|    |              |             |             |
|----|--------------|-------------|-------------|
| Cl | -0.35231100  | -0.05357300 | -1.81928600 |
| O  | -6.75574000  | 1.15307400  | -0.80561700 |
| N  | -9.90945400  | 2.55732900  | -0.90506900 |
| N  | -10.29811100 | -1.02319000 | 1.55459800  |
| N  | -7.08172800  | -2.75887000 | 1.88578200  |
| C  | -9.39771000  | 1.63265700  | -0.42873500 |
| C  | -9.60098100  | -0.34345600 | 0.92632700  |
| C  | -6.89253500  | -1.83172100 | 1.21677900  |
| C  | -8.78848100  | 0.50608400  | 0.15545300  |
| C  | -7.41538600  | 0.26670400  | -0.04468000 |
| C  | -6.56390400  | -0.74172500 | 0.40303700  |

|   |             |             |             |
|---|-------------|-------------|-------------|
| C | -5.23665100 | -0.50104800 | -0.10161100 |
| C | -5.33396000 | 0.77339500  | -0.92682000 |
| C | -5.08299700 | 0.55711500  | -2.41311500 |
| H | -4.04097900 | 0.29980000  | -2.59288300 |
| H | -5.31613400 | 1.46917200  | -2.96317800 |
| H | -5.70816000 | -0.25309600 | -2.78726100 |
| C | -4.53828700 | 1.93655800  | -0.34986600 |
| H | -3.46959500 | 1.74793400  | -0.43184700 |
| H | -4.78427000 | 2.07749200  | 0.70223400  |
| H | -4.77321800 | 2.85079400  | -0.89554800 |
| C | -4.13770800 | -1.26630600 | 0.12551200  |
| H | -4.28964700 | -2.14376300 | 0.74229800  |
| C | -2.82148900 | -1.01770000 | -0.37364100 |
| H | -2.69413500 | -0.15411900 | -1.00782000 |
| C | -1.71129900 | -1.76314000 | -0.13899700 |
| C | -1.72353100 | -3.00508500 | 0.72192500  |
| H | -1.86948400 | -3.88606600 | 0.08537700  |
| H | -2.56499700 | -2.97481500 | 1.41156300  |
| C | -0.42010600 | -3.16121400 | 1.49861900  |
| H | -0.30818500 | -2.31479500 | 2.18119400  |
| C | 0.76705400  | -3.20906900 | 0.54720100  |
| H | 0.78187900  | -4.17186200 | 0.02466800  |
| H | 1.70998900  | -3.16904900 | 1.09604100  |
| C | 0.73522800  | -2.08864400 | -0.46145700 |
| C | -0.41644000 | -1.43989600 | -0.71312000 |
| C | 2.04905500  | -1.68832900 | -1.10017300 |
| H | 1.86076700  | -1.39503400 | -2.13417800 |
| H | -0.44859400 | -4.06582600 | 2.10810500  |
| O | 3.27200900  | 0.47726000  | -2.53059200 |
| N | 2.79056300  | 3.40637700  | 1.18249200  |
| C | 1.96571200  | 1.27016400  | 2.95738000  |
| C | 1.51864100  | 2.71812100  | 3.16831800  |
| C | 2.51088900  | 3.69550000  | 2.58713000  |
| H | 3.44877300  | 3.69463000  | 3.15133800  |
| C | 3.37607700  | 4.50090600  | 0.41680700  |
| H | 3.12020100  | 5.43084800  | 0.91989200  |
| H | 4.46696000  | 4.41317900  | 0.42776600  |
| C | 2.82847600  | 4.47809000  | -0.98697100 |
| H | 3.22658600  | 5.31678200  | -1.55960200 |
| H | 1.74444100  | 4.60478600  | -0.93328600 |
| C | 3.16325600  | 3.16683800  | -1.71261000 |
| C | 2.92991200  | 1.98157300  | -0.75986400 |
| C | 2.97397200  | 0.68205100  | -1.22297600 |
| C | 2.69427800  | -0.47329000 | -0.39619100 |
| C | 2.23890500  | -0.16286600 | 0.92958200  |
| H | 1.94809300  | -0.99556600 | 1.55109200  |
| C | 2.26418300  | 1.07379500  | 1.47450500  |
| C | 2.65452900  | 2.18653700  | 0.63835900  |
| C | 3.24463700  | 0.97260900  | 3.76312100  |
| H | 3.52804400  | -0.07372700 | 3.64177100  |
| H | 3.07954800  | 1.16514300  | 4.82552500  |
| H | 4.08751100  | 1.57945500  | 3.43142200  |
| C | 0.84215800  | 0.34569700  | 3.44263500  |
| H | 1.13522300  | -0.70359900 | 3.42537600  |
| H | -0.05430300 | 0.46226900  | 2.83197700  |
| H | 0.58947500  | 0.59281800  | 4.47516100  |
| C | 4.62914600  | 3.21222000  | -2.17864000 |
| H | 4.89698500  | 2.31256300  | -2.72638500 |
| H | 5.31469600  | 3.31126600  | -1.33602000 |
| H | 4.77865100  | 4.06836000  | -2.84021900 |
| C | 2.22743100  | 3.10762200  | -2.93587700 |
| H | 1.19107300  | 2.98161000  | -2.61761100 |
| H | 2.29931400  | 4.04985400  | -3.48366900 |
| H | 2.48136400  | 2.29690200  | -3.61038700 |
| C | 4.35942500  | -0.40434600 | -2.85661500 |
| H | 4.26723500  | -1.36907200 | -2.36423900 |
| H | 5.30587500  | 0.06089900  | -2.57403600 |
| H | 2.11355400  | 4.70922700  | 2.63329600  |
| H | 0.54608000  | 2.86735500  | 2.69221500  |
| H | 1.39664000  | 2.92248300  | 4.23297400  |
| H | 3.91086000  | -0.87660900 | -0.06017200 |

|   |            |             |             |
|---|------------|-------------|-------------|
| O | 2.97151900 | -2.77713600 | -1.10379600 |
| C | 2.71260300 | -3.73976100 | -2.12449700 |
| H | 1.69001500 | -4.12004200 | -2.03387400 |
| H | 2.79568900 | -3.25401000 | -3.10454600 |
| C | 3.71689600 | -4.86108100 | -1.98873700 |
| H | 4.73527100 | -4.48106800 | -2.08369300 |
| H | 3.61817000 | -5.35234900 | -1.01950200 |
| H | 3.55345300 | -5.60548100 | -2.76917900 |
| C | 6.07249200 | -0.22460200 | 0.63771500  |
| C | 7.31028400 | -0.46802500 | 1.20856200  |
| C | 7.64073500 | -1.77565400 | 1.54515900  |
| C | 6.72617100 | -2.79312800 | 1.30187300  |
| C | 5.50748500 | -2.46974900 | 0.72721800  |
| N | 5.20467400 | -1.21151200 | 0.40593000  |
| H | 8.59986900 | -1.99827500 | 1.99267700  |
| H | 5.75735400 | 0.77135300  | 0.35540500  |
| H | 7.99517800 | 0.34877700  | 1.38447800  |
| H | 6.95004800 | -3.82055200 | 1.55038000  |
| H | 4.75016800 | -3.20782600 | 0.50325900  |
| H | 4.32304400 | -0.53131200 | -3.93471600 |

#### INT-I-C

|    |              |             |             |
|----|--------------|-------------|-------------|
| Cl | -0.83483900  | 0.50672100  | -1.81964000 |
| O  | -7.23233600  | 1.43623900  | -0.50691200 |
| N  | -10.42538900 | 2.74817600  | -0.38832400 |
| N  | -10.63632000 | -1.03439200 | 1.76603200  |
| N  | -7.35210600  | -2.68994800 | 1.86337900  |
| C  | -9.87122400  | 1.80365200  | -0.00818900 |
| C  | -9.97663700  | -0.28406000 | 1.17904100  |
| C  | -7.21480900  | -1.70639600 | 1.26599300  |
| C  | -9.21212600  | 0.65126200  | 0.46024600  |
| C  | -7.84047900  | 0.47077300  | 0.19839200  |
| C  | -6.94627900  | -0.54473300 | 0.53324400  |
| C  | -5.64516100  | -0.22414200 | 0.00552800  |
| C  | -5.80643600  | 1.10982700  | -0.70791200 |
| C  | -5.60514300  | 1.02238000  | -2.21487100 |
| H  | -4.56423600  | 0.81046300  | -2.45117700 |
| H  | -5.88187600  | 1.96906900  | -2.67954600 |
| H  | -6.22269300  | 0.22766000  | -2.63240400 |
| C  | -5.02070800  | 2.24482800  | -0.06538600 |
| H  | -3.95132200  | 2.09524900  | -0.20117700 |
| H  | -5.22990200  | 2.29194200  | 1.00293400  |
| H  | -5.30045800  | 3.19326800  | -0.52469900 |
| C  | -4.51890000  | -0.97359800 | 0.12868600  |
| H  | -4.62511800  | -1.90375600 | 0.67364000  |
| C  | -3.23013100  | -0.65013400 | -0.39831600 |
| H  | -3.14575300  | 0.26853900  | -0.95765500 |
| C  | -2.09950700  | -1.39258700 | -0.27864100 |
| C  | -2.06605400  | -2.70598600 | 0.47028200  |
| H  | -2.30079800  | -3.52391200 | -0.22151100 |
| H  | -2.83876400  | -2.71612100 | 1.23730400  |
| C  | -0.70369100  | -2.96649600 | 1.10313500  |
| H  | -0.50308000  | -2.19973100 | 1.85684300  |
| C  | 0.38834300   | -2.93295500 | 0.04396600  |
| H  | 0.29506500   | -3.81268600 | -0.60309200 |
| H  | 1.37640700   | -3.01521500 | 0.49782600  |
| C  | 0.31999800   | -1.67904100 | -0.79302900 |
| C  | -0.83906000  | -1.00094100 | -0.88721200 |
| C  | 1.59120700   | -1.19464300 | -1.45886400 |
| H  | 1.34945500   | -0.77944000 | -2.43675900 |
| H  | -0.70319600  | -3.93084400 | 1.61368600  |
| O  | 2.85042400   | 1.09256500  | -2.63747300 |
| N  | 4.27934200   | 2.75440000  | 1.67105000  |
| C  | 3.01818700   | 0.48858600  | 3.03789900  |
| C  | 3.52537600   | 1.75139900  | 3.74570000  |
| C  | 4.69173400   | 2.36955100  | 3.00795000  |
| H  | 5.54444400   | 1.67559100  | 2.97080600  |
| C  | 5.09376400   | 3.75336100  | 1.01239700  |
| H  | 5.35937300   | 4.51033200  | 1.75048300  |



|   |            |             |             |
|---|------------|-------------|-------------|
| H | 6.03377900 | 3.31974700  | 0.63981000  |
| C | 4.29144400 | 4.36086800  | -0.11127000 |
| H | 4.84118600 | 5.18024000  | -0.57688000 |
| H | 3.37808700 | 4.78149200  | 0.31654200  |
| C | 3.92979300 | 3.32444100  | -1.18846600 |
| C | 3.48180100 | 2.01349500  | -0.51404300 |
| C | 2.89600900 | 0.98073200  | -1.26156600 |
| C | 2.30354800 | -0.13430100 | -0.65526400 |
| C | 2.35294000 | -0.21645300 | 0.72909700  |
| H | 1.87615300 | -1.05619800 | 1.21041300  |
| C | 2.99630400 | 0.71216900  | 1.52264700  |
| C | 3.59599000 | 1.83635600  | 0.89768000  |
| C | 3.93846400 | -0.69862800 | 3.37475400  |
| H | 3.61996200 | -1.60009700 | 2.84957200  |
| H | 3.91146400 | -0.90338700 | 4.44747100  |
| H | 4.97152000 | -0.49704900 | 3.09327600  |
| C | 1.60611700 | 0.18276000  | 3.56418800  |
| H | 1.22560500 | -0.76893500 | 3.19374100  |
| H | 0.90528300 | 0.96629800  | 3.27256100  |
| H | 1.62416400 | 0.12657300  | 4.65470900  |
| C | 5.15676900 | 3.11671200  | -2.09382300 |
| H | 4.91759200 | 2.50080700  | -2.95494500 |
| H | 5.97889900 | 2.64559900  | -1.55347600 |
| H | 5.50483100 | 4.08360700  | -2.46453000 |
| C | 2.78404000 | 3.94031400  | -2.01441300 |
| H | 1.89048600 | 4.05627100  | -1.39829000 |
| H | 3.08413600 | 4.93203000  | -2.36153500 |
| H | 2.53203000 | 3.33263000  | -2.87791400 |
| C | 3.74953800 | 0.24961100  | -3.36315200 |
| H | 3.52919500 | -0.80465500 | -3.20781600 |
| H | 4.78411900 | 0.43839600  | -3.06910300 |
| H | 5.03356900 | 3.26845700  | 3.52067000  |
| H | 2.72248200 | 2.49102900  | 3.79689700  |
| H | 3.81136000 | 1.50789500  | 4.77074200  |
| H | 3.97488100 | -2.24151900 | -0.77982600 |
| O | 2.50560300 | -2.29831300 | -1.66435500 |
| C | 2.15922200 | -3.15685300 | -2.75981600 |
| H | 1.11570300 | -3.46444400 | -2.66108800 |
| H | 2.25260700 | -2.59277300 | -3.69370800 |
| C | 3.07937400 | -4.35446200 | -2.74903500 |
| H | 4.12271700 | -4.04848600 | -2.84262800 |
| H | 2.95946200 | -4.92652700 | -1.82762000 |
| H | 2.84318200 | -5.00898500 | -3.58865600 |
| C | 5.48340900 | -1.05047500 | -0.05225500 |
| C | 6.62461500 | -0.99245300 | 0.71767000  |
| C | 7.07929300 | -2.15041500 | 1.33708300  |
| C | 6.38109900 | -3.34239900 | 1.17406300  |
| C | 5.24905100 | -3.34956200 | 0.38825300  |
| N | 4.83925100 | -2.21675200 | -0.20043500 |
| H | 7.96923800 | -2.12435300 | 1.95015200  |
| H | 5.05298400 | -0.19476400 | -0.54738300 |
| H | 7.13731900 | -0.05022600 | 0.83612500  |
| H | 6.70675100 | -4.25538800 | 1.64841700  |
| H | 4.65155600 | -4.22989000 | 0.21045400  |
| H | 3.62292700 | 0.49945400  | -4.41399100 |

#### TS-I-C

|    |              |             |             |
|----|--------------|-------------|-------------|
| Cl | -1.31324100  | 1.99717100  | -0.68013300 |
| O  | -7.80646100  | 1.50776700  | 0.20483700  |
| N  | -11.16990000 | 2.23224200  | 0.55523100  |
| N  | -10.83617700 | -2.08602100 | 1.06509800  |
| N  | -7.37046500  | -3.20214000 | 0.73500700  |
| C  | -10.48590400 | 1.29772000  | 0.58339100  |
| C  | -10.29027500 | -1.08489900 | 0.86304400  |
| C  | -7.36089600  | -2.05312800 | 0.59125100  |
| C  | -9.66585400  | 0.15243400  | 0.62060000  |
| C  | -8.28206800  | 0.27544500  | 0.42198400  |
| C  | -7.24902200  | -0.66903200 | 0.40430000  |
| C  | -6.00697900  | -0.00375000 | 0.15989700  |

|   |             |             |             |
|---|-------------|-------------|-------------|
| C | -6.34289500 | 1.47198400  | 0.01590500  |
| C | -6.08702200 | 2.02113500  | -1.38133600 |
| H | -5.01950900 | 2.06142200  | -1.58842200 |
| H | -6.49464600 | 3.02906200  | -1.45935200 |
| H | -6.56089400 | 1.38675100  | -2.12971800 |
| C | -5.75545800 | 2.34214900  | 1.11895700  |
| H | -4.67246400 | 2.39783700  | 1.02808600  |
| H | -5.99936700 | 1.92927900  | 2.09725900  |
| H | -6.16285100 | 3.35063200  | 1.04651700  |
| C | -4.77893700 | -0.59486300 | 0.07587100  |
| H | -4.76037500 | -1.67024800 | 0.20169900  |
| C | -3.55072200 | 0.07230000  | -0.16849200 |
| H | -3.58960900 | 1.13979200  | -0.31573800 |
| C | -2.32004000 | -0.51461600 | -0.25454900 |
| C | -2.15116700 | -2.00856200 | -0.05914700 |
| H | -2.43075500 | -2.52618300 | -0.98389100 |
| H | -2.84579600 | -2.35235700 | 0.70731500  |
| C | -0.72990200 | -2.40492300 | 0.32050700  |
| H | -0.50157400 | -2.04781600 | 1.32860600  |
| C | 0.25288800  | -1.79601800 | -0.66765500 |
| H | 0.04859800  | -2.20543700 | -1.66343800 |
| H | 1.27623900  | -2.07881400 | -0.44058200 |
| C | 0.11139400  | -0.29020600 | -0.72087500 |
| C | -1.13132300 | 0.24128700  | -0.56045000 |
| C | 1.27396000  | 0.54977700  | -0.98813300 |
| H | 1.03548400  | 1.51672500  | -1.40482000 |
| H | -0.63615000 | -3.49162300 | 0.33069300  |
| O | 3.12792600  | 2.58084100  | -1.21581000 |
| N | 5.88243800  | 0.63221700  | 2.25483900  |
| C | 3.83769200  | -1.37733900 | 2.82796200  |
| C | 4.95499600  | -1.00075900 | 3.80508500  |
| C | 6.18996700  | -0.53165600 | 3.07084000  |
| H | 6.60739300  | -1.33262100 | 2.44830400  |
| C | 6.95635600  | 1.58973900  | 2.07866800  |
| H | 7.47560500  | 1.68648300  | 3.03292800  |
| H | 7.69180900  | 1.21930800  | 1.35415600  |
| C | 6.39160300  | 2.92023800  | 1.65558400  |
| H | 7.20400900  | 3.63346800  | 1.50996600  |
| H | 5.75739100  | 3.30595600  | 2.45820900  |
| C | 5.56927200  | 2.82493400  | 0.36187200  |
| C | 4.53513900  | 1.69690600  | 0.52011400  |
| C | 3.40185200  | 1.60937700  | -0.28546600 |
| C | 2.43746000  | 0.58576100  | -0.12641600 |
| C | 2.63028300  | -0.32096100 | 0.91785400  |
| H | 1.86876500  | -1.05675500 | 1.10873300  |
| C | 3.73412200  | -0.31308500 | 1.73087000  |
| C | 4.74201700  | 0.67278300  | 1.50717500  |
| C | 4.13951200  | -2.74612800 | 2.19138400  |
| H | 3.37089800  | -3.01523600 | 1.46590300  |
| H | 4.16977100  | -3.52026800 | 2.96161200  |
| H | 5.09432900  | -2.74555500 | 1.66799000  |
| C | 2.52618700  | -1.48106000 | 3.62308400  |
| H | 1.70572100  | -1.86785100 | 3.01883600  |
| H | 2.23136500  | -0.50756600 | 4.01766300  |
| H | 2.66186600  | -2.16521500 | 4.46320600  |
| C | 6.51987700  | 2.51543900  | -0.81034100 |
| H | 5.99238200  | 2.50716600  | -1.76006100 |
| H | 7.00045100  | 1.54403500  | -0.69361900 |
| H | 7.30102900  | 3.27745000  | -0.86644100 |
| C | 4.94470100  | 4.21885300  | 0.16585500  |
| H | 4.16284700  | 4.39970500  | 0.90515200  |
| H | 5.72303600  | 4.97196000  | 0.30756600  |
| H | 4.51550600  | 4.35911500  | -0.81965300 |
| C | 3.56359400  | 2.42523800  | -2.57246800 |
| H | 2.69111200  | 2.42137300  | -3.22364100 |
| H | 4.11141800  | 1.49651100  | -2.71198400 |
| H | 6.96537800  | -0.24104300 | 3.77807300  |
| H | 4.61471900  | -0.19509800 | 4.46075700  |
| H | 5.19771400  | -1.85699900 | 4.43697100  |
| H | 2.54301400  | -0.93395300 | -2.36607400 |
| O | 1.94456800  | -0.09025900 | -2.55453100 |

|   |            |             |             |
|---|------------|-------------|-------------|
| C | 1.03955300 | -0.24177200 | -3.66271100 |
| H | 0.31579800 | -1.02905900 | -3.44744900 |
| H | 0.50008800 | 0.70138900  | -3.74487700 |
| C | 1.81684300 | -0.54197700 | -4.92776900 |
| H | 2.53373700 | 0.25120800  | -5.14028400 |
| H | 2.35480000 | -1.48716100 | -4.84491100 |
| H | 1.12462700 | -0.61887500 | -5.76781200 |
| C | 4.73729300 | -1.58755000 | -1.50003700 |
| C | 5.75000400 | -2.45415700 | -1.12465600 |
| C | 5.54689000 | -3.81927600 | -1.27675900 |
| C | 4.34018200 | -4.26711900 | -1.79960700 |
| C | 3.38259500 | -3.33092700 | -2.15662100 |
| N | 3.57946800 | -2.01783300 | -2.00946300 |
| H | 6.31426500 | -4.52443200 | -0.98726600 |
| H | 4.84440000 | -0.51791100 | -1.38177300 |
| H | 6.66969600 | -2.06322100 | -0.71355000 |
| H | 4.14088000 | -5.32105700 | -1.93029800 |
| H | 2.42861400 | -3.63187800 | -2.57049200 |
| H | 4.20189800 | 3.27124200  | -2.83015300 |

#### Type-I product (TCF1-based)

|    |              |             |             |
|----|--------------|-------------|-------------|
| Cl | -0.82380700  | -1.90789800 | -0.06243300 |
| O  | -7.32678400  | -1.38434300 | 0.32068700  |
| N  | -10.72015800 | -2.01100200 | 0.69228600  |
| N  | -10.36997300 | 2.27302400  | -0.07225900 |
| N  | -6.94487300  | 3.28587700  | -0.51355200 |
| C  | -10.03258800 | -1.10565700 | 0.48249000  |
| C  | -9.82375300  | 1.26280400  | 0.05860900  |
| C  | -6.90643400  | 2.14775800  | -0.32053900 |
| C  | -9.20036500  | 0.00780700  | 0.22585000  |
| C  | -7.82419100  | -0.16289300 | 0.14849000  |
| C  | -6.77506800  | 0.76521000  | -0.09273700 |
| C  | -5.55196000  | 0.08869800  | -0.07153900 |
| C  | -5.85523200  | -1.37114600 | 0.20471000  |
| C  | -5.32246400  | -1.86407800 | 1.54430600  |
| H  | -4.23671500  | -1.92901200 | 1.52525100  |
| H  | -5.72581100  | -2.85514600 | 1.74902300  |
| H  | -5.61601300  | -1.18667900 | 2.34520000  |
| C  | -5.51503900  | -2.29565200 | -0.95732100 |
| H  | -4.43722700  | -2.37128400 | -1.08413700 |
| H  | -5.94811900  | -1.91958900 | -1.88331500 |
| H  | -5.91171100  | -3.28995400 | -0.75518100 |
| C  | -4.30223800  | 0.67304100  | -0.27086900 |
| H  | -4.30761900  | 1.73984100  | -0.45203200 |
| C  | -3.09461200  | -0.00072600 | -0.24246200 |
| H  | -3.11256100  | -1.06014800 | -0.04729900 |
| C  | -1.82953500  | 0.57681200  | -0.41972300 |
| C  | -1.71133000  | 2.05821100  | -0.69823800 |
| H  | -1.80010000  | 2.61277700  | 0.24263200  |
| H  | -2.54644300  | 2.37455700  | -1.32317000 |
| C  | -0.40014400  | 2.40003800  | -1.38238800 |
| H  | -0.39148400  | 1.96591000  | -2.38604200 |
| C  | 0.77770100   | 1.85595400  | -0.58929400 |
| H  | 0.85773100   | 2.39685300  | 0.36024800  |
| H  | 1.69926300   | 2.04387200  | -1.13770400 |
| C  | 0.65942300   | 0.36933100  | -0.32968300 |
| C  | -0.65575700  | -0.16973700 | -0.31005700 |
| C  | 1.75537600   | -0.45107500 | -0.13048800 |
| H  | 1.53346200   | -1.50419700 | -0.11951700 |
| H  | -0.30346600  | 3.48037500  | -1.49695000 |
| O  | 3.57568900   | -2.52095000 | -0.07877500 |
| N  | 7.28058300   | 0.52084500  | 0.07792400  |
| C  | 5.53534900   | 2.76739500  | 0.60584800  |
| C  | 6.91127800   | 2.94659700  | -0.04145300 |
| C  | 7.85530800   | 1.83347100  | 0.34252300  |
| H  | 8.13773500   | 1.90411800  | 1.39905600  |
| C  | 8.23019900   | -0.57974000 | 0.06091000  |
| H  | 9.19387000   | -0.18155100 | -0.25300200 |
| H  | 8.36034600   | -0.98032000 | 1.07279800  |

|   |            |             |             |
|---|------------|-------------|-------------|
| C | 7.75374800 | -1.63983300 | -0.89769100 |
| H | 8.47926800 | -2.45271000 | -0.94907400 |
| H | 7.68824100 | -1.19685000 | -1.89476000 |
| C | 6.38610300 | -2.21008600 | -0.49545400 |
| C | 5.43989800 | -1.04437200 | -0.15270400 |
| C | 4.07074500 | -1.23721200 | -0.05643900 |
| C | 3.13611000 | -0.16050700 | 0.00962800  |
| C | 3.68555400 | 1.12509100  | 0.20297900  |
| H | 3.01589000 | 1.94812500  | 0.36808700  |
| C | 5.02842700 | 1.37030200  | 0.26221100  |
| C | 5.94430600 | 0.28723200  | 0.05039400  |
| C | 5.63482400 | 2.89779300  | 2.13810500  |
| H | 4.64333700 | 2.81624100  | 2.58562400  |
| H | 6.05778300 | 3.86744700  | 2.41133100  |
| H | 6.25755400 | 2.11715600  | 2.57515600  |
| C | 4.61378400 | 3.87258400  | 0.07488700  |
| H | 3.64526400 | 3.88100800  | 0.57453400  |
| H | 4.44656000 | 3.76447400  | -0.99795700 |
| H | 5.07700400 | 4.84483000  | 0.25243200  |
| C | 6.57333500 | -3.16080000 | 0.70008000  |
| H | 5.65217300 | -3.68701300 | 0.93351700  |
| H | 6.89493400 | -2.62809400 | 1.59550600  |
| H | 7.33193000 | -3.90876000 | 0.45806100  |
| C | 5.88855200 | -3.01227900 | -1.71304700 |
| H | 5.68914500 | -2.34625600 | -2.55457900 |
| H | 6.66810200 | -3.71421200 | -2.01789900 |
| H | 4.98583800 | -3.57315600 | -1.49495200 |
| C | 3.13912100 | -3.01867400 | 1.19476100  |
| H | 2.24516600 | -2.49946900 | 1.54332700  |
| H | 3.92698000 | -2.90856900 | 1.94101400  |
| H | 8.77791100 | 1.90711800  | -0.23449400 |
| H | 6.79551500 | 2.96377400  | -1.12839000 |
| H | 7.34534400 | 3.90243400  | 0.25646700  |
| H | 2.91476200 | -4.07249900 | 1.04854500  |

#### EtOH

|   |             |             |             |
|---|-------------|-------------|-------------|
| O | -1.24310600 | -0.25535100 | -0.10877900 |
| C | -0.07436500 | 0.55822200  | 0.04723100  |
| H | -0.11778500 | 1.28368900  | -0.76581700 |
| H | -0.12756700 | 1.11328800  | 0.99012800  |
| C | 1.21201600  | -0.24409300 | -0.02184900 |
| H | 1.26179800  | -0.97206300 | 0.79174600  |
| H | 1.28393900  | -0.77997400 | -0.96985000 |
| H | 2.07619300  | 0.41800800  | 0.06757100  |
| H | -1.25763700 | -0.90491600 | 0.60415500  |

#### Pyridine

|   |             |             |             |
|---|-------------|-------------|-------------|
| C | -1.14208500 | -0.71936100 | 0.00000000  |
| C | -1.19406700 | 0.66942100  | -0.00000200 |
| C | 0.00000000  | 1.37841300  | 0.00000000  |
| C | 1.19406600  | 0.66942200  | 0.00000100  |
| C | 1.14208500  | -0.71936000 | -0.00000100 |
| N | 0.00000000  | -1.41232700 | 0.00000200  |
| H | -0.00000100 | 2.46055400  | 0.00000500  |
| H | -2.05789400 | -1.30010800 | 0.00000300  |
| H | -2.14886200 | 1.17736900  | -0.00000100 |
| H | 2.14886200  | 1.17737100  | 0.00000200  |
| H | 2.05789400  | -1.30010700 | -0.00000600 |

#### TCF1-based (Path II)

##### INT-II-A

|    |             |             |             |
|----|-------------|-------------|-------------|
| Cl | -1.35622800 | 0.77928800  | -1.73602900 |
| O  | 5.06890400  | -0.42790400 | -1.43904400 |

|   |             |             |             |
|---|-------------|-------------|-------------|
| N | 8.27131300  | -1.69373600 | -1.90688400 |
| N | 8.62119800  | 1.34858000  | 1.20692400  |
| N | 5.47231700  | 2.88946300  | 1.95122900  |
| C | 7.74945500  | -0.90116900 | -1.24799100 |
| C | 7.92722200  | 0.78606300  | 0.47455700  |
| C | 5.24177300  | 2.11446100  | 1.12792200  |
| C | 7.11830700  | 0.07166300  | -0.43685500 |
| C | 5.75648300  | 0.28747500  | -0.55795100 |
| C | 4.88390800  | 1.19019400  | 0.12544500  |
| C | 3.59349300  | 1.02120300  | -0.35377900 |
| C | 3.63839000  | -0.06345200 | -1.40999400 |
| C | 3.29782800  | 0.42699000  | -2.81140200 |
| H | 2.23653900  | 0.65192600  | -2.89145900 |
| H | 3.54067700  | -0.35394500 | -3.53086100 |
| H | 3.86466600  | 1.32500600  | -3.05284100 |
| C | 2.88969600  | -1.32849600 | -1.01441500 |
| H | 1.81680200  | -1.15452300 | -0.99120500 |
| H | 3.20295200  | -1.66650600 | -0.02835600 |
| H | 3.10073600  | -2.10946400 | -1.74322100 |
| C | 2.46814400  | 1.73988900  | 0.08155600  |
| H | 2.65333700  | 2.48325100  | 0.84540900  |
| C | 1.19446700  | 1.55940500  | -0.39089400 |
| H | 1.03254800  | 0.81568300  | -1.15379200 |
| C | 0.05112000  | 2.28046800  | 0.02401900  |
| C | 0.17394600  | 3.32891100  | 1.10828800  |
| H | 0.57630000  | 4.25066900  | 0.67448100  |
| H | 0.90301400  | 2.99166700  | 1.84553300  |
| C | -1.15214600 | 3.61264900  | 1.79989200  |
| H | -1.44718000 | 2.73966400  | 2.38725000  |
| C | -2.23608500 | 3.92745000  | 0.78006700  |
| H | -2.01181000 | 4.87837700  | 0.28500000  |
| H | -3.20339700 | 4.05153300  | 1.26565100  |
| C | -2.34511000 | 2.84184800  | -0.26539800 |
| C | -1.18104200 | 2.06910200  | -0.56037900 |
| C | -3.51845100 | 2.63997300  | -0.91923500 |
| H | -3.62406500 | 1.89604300  | -1.69743600 |
| H | -1.03785500 | 4.44412200  | 2.49601900  |
| O | -4.59105200 | 3.37118900  | -0.64418300 |
| C | -5.80131300 | 3.04076000  | -1.37350000 |
| H | -5.59587700 | 3.14497400  | -2.44047200 |
| H | -6.05425700 | 2.00021700  | -1.16177400 |
| C | -6.89004500 | 3.97942800  | -0.92022100 |
| H | -7.07708000 | 3.87004700  | 0.14841600  |
| H | -6.62129800 | 5.01569900  | -1.12704600 |
| H | -7.81146100 | 3.74901900  | -1.45627300 |
| O | -4.26542800 | 0.39180700  | 0.20055200  |
| O | 0.70522200  | -3.38149900 | 0.58271500  |
| N | -3.37503600 | -1.02070700 | 1.48790900  |
| C | -4.65669900 | -2.13906700 | -0.90695600 |
| C | -5.40886200 | -1.44050400 | 0.23269500  |
| C | -4.54954900 | -0.39848800 | 0.90920900  |
| C | -2.65002700 | -0.20017600 | 2.43636100  |
| H | -3.37878800 | 0.32412000  | 3.05525900  |
| H | -2.05239100 | 0.56444500  | 1.92096100  |
| C | -1.77309000 | -1.09137000 | 3.27914200  |
| H | -1.27163800 | -0.51326000 | 4.05799900  |
| H | -2.41504100 | -1.82219900 | 3.77748500  |
| C | -0.71325400 | -1.81831000 | 2.43503300  |
| C | -1.32133500 | -2.27260500 | 1.09597900  |
| C | -0.58284500 | -3.09207300 | 0.22371500  |
| C | -1.12822000 | -3.57788800 | -0.95985900 |
| H | -0.55407600 | -4.20235200 | -1.62549400 |
| C | -2.43811900 | -3.25583500 | -1.27572700 |
| H | -2.85605800 | -3.65577900 | -2.19005900 |
| C | -3.21763400 | -2.43805200 | -0.47641300 |
| C | -2.63642800 | -1.90284900 | 0.70311600  |
| C | -4.65170400 | -1.23959500 | -2.15571200 |
| H | -4.12658300 | -1.72350600 | -2.98018700 |
| H | -5.67413600 | -1.02749600 | -2.47798700 |
| H | -4.14815800 | -0.29476200 | -1.95977800 |
| C | -5.41080600 | -3.43673900 | -1.24150600 |

|   |             |             |             |
|---|-------------|-------------|-------------|
| H | -4.98988900 | -3.94316400 | -2.11001700 |
| H | -5.38404200 | -4.12806100 | -0.39756000 |
| H | -6.45610600 | -3.21035400 | -1.46548700 |
| C | 0.46346700  | -0.85429800 | 2.19880000  |
| H | 1.22919800  | -1.30872400 | 1.57652400  |
| H | 0.12652600  | 0.05747000  | 1.70795600  |
| H | 0.91471700  | -0.57720200 | 3.15510100  |
| C | -0.23717300 | -3.01607600 | 3.28117500  |
| H | -1.03922800 | -3.74913400 | 3.38882300  |
| H | 0.03206500  | -2.66397400 | 4.28024200  |
| H | 0.62606800  | -3.51003800 | 2.84672000  |
| C | 1.41604700  | -4.36766900 | -0.14927900 |
| H | 1.59090800  | -4.05782000 | -1.18186500 |
| H | -5.10051100 | 0.08595800  | 1.71630200  |
| H | -5.70598900 | -2.17901100 | 0.98194400  |
| H | -6.32205000 | -0.98328700 | -0.15443100 |
| H | 2.37245800  | -4.48133000 | 0.35521600  |
| H | 0.88475800  | -5.32250200 | -0.14591400 |

**TS-II-A**

|    |             |             |             |
|----|-------------|-------------|-------------|
| Cl | 1.34206000  | -0.55460600 | -1.74912100 |
| O  | -5.06737800 | 0.52049200  | -1.30979100 |
| N  | -8.23723200 | 1.85094000  | -1.70357000 |
| N  | -8.70695800 | -1.54766800 | 0.99197800  |
| N  | -5.52273300 | -3.18999000 | 1.63548600  |
| C  | -7.73924800 | 0.97577800  | -1.13199100 |
| C  | -7.98606700 | -0.90297500 | 0.35598800  |
| C  | -5.29413100 | -2.31355100 | 0.91520000  |
| C  | -7.14437300 | -0.09311000 | -0.43041400 |
| C  | -5.76575700 | -0.31266800 | -0.53260500 |
| C  | -4.92400500 | -1.27776500 | 0.04496300  |
| C  | -3.58821800 | -1.05204600 | -0.38681300 |
| C  | -3.63663800 | 0.15632900  | -1.30743300 |
| C  | -3.28182900 | -0.16898700 | -2.75240400 |
| H  | -2.22628600 | -0.41851900 | -2.84018100 |
| H  | -3.48859100 | 0.69554200  | -3.38301400 |
| H  | -3.86829000 | -1.01637500 | -3.10577500 |
| C  | -2.89837800 | 1.37446200  | -0.77054900 |
| H  | -1.82276700 | 1.21464500  | -0.77780200 |
| H  | -3.20605200 | 1.58823400  | 0.25176600  |
| H  | -3.12487000 | 2.23705000  | -1.39647900 |
| C  | -2.49083500 | -1.79764500 | -0.03851100 |
| H  | -2.67644900 | -2.64062300 | 0.61492600  |
| C  | -1.16965500 | -1.54222500 | -0.45506300 |
| H  | -1.01541500 | -0.68919200 | -1.09628100 |
| C  | -0.04482900 | -2.25507600 | -0.12045100 |
| C  | -0.09338600 | -3.48598900 | 0.75405200  |
| H  | -0.15732600 | -4.37483900 | 0.11609300  |
| H  | -0.99379700 | -3.47582800 | 1.36505700  |
| C  | 1.13466500  | -3.59336200 | 1.65117500  |
| H  | 1.12539600  | -2.76756100 | 2.36590800  |
| C  | 2.42172300  | -3.55775500 | 0.83734600  |
| H  | 2.58862500  | -4.52561000 | 0.35247100  |
| H  | 3.28268600  | -3.40738500 | 1.49146700  |
| C  | 2.42064700  | -2.48477100 | -0.22516600 |
| C  | 1.24822800  | -1.88759900 | -0.60374000 |
| C  | 3.69630500  | -2.07369500 | -0.76175000 |
| H  | 3.69743100  | -1.67393300 | -1.77380300 |
| H  | 1.09402600  | -4.51372400 | 2.23505800  |
| O  | 4.72753400  | -2.91456600 | -0.48813900 |
| C  | 5.93787000  | -2.67096100 | -1.22942600 |
| H  | 5.69725200  | -2.65859300 | -2.29578100 |
| H  | 6.32872000  | -1.68831500 | -0.95515400 |
| C  | 6.92509600  | -3.76154900 | -0.89486500 |
| H  | 7.15359600  | -3.76360200 | 0.17141300  |
| H  | 6.53068200  | -4.73968500 | -1.17179000 |
| H  | 7.85206300  | -3.59505400 | -1.44490300 |
| H  | 3.98304100  | -0.92872800 | -0.13274100 |
| O  | -0.63482900 | 3.44932600  | 0.78526500  |

|   |             |             |             |
|---|-------------|-------------|-------------|
| N | 3.17656200  | 0.59584400  | 1.25690100  |
| C | 4.55379800  | 1.90217500  | -0.98243400 |
| C | 5.24290100  | 1.00950700  | 0.05981100  |
| C | 4.32551400  | 0.06754800  | 0.77413800  |
| C | 2.47656300  | -0.10374200 | 2.33755400  |
| H | 3.20529000  | -0.71985300 | 2.85914600  |
| H | 1.71865100  | -0.75929600 | 1.91461200  |
| C | 1.84391300  | 0.91492000  | 3.24727800  |
| H | 1.39362500  | 0.41326700  | 4.10464100  |
| H | 2.62121400  | 1.58199900  | 3.62813300  |
| C | 0.76785200  | 1.72573800  | 2.51045500  |
| C | 1.30582900  | 2.15385000  | 1.13702200  |
| C | 0.60008300  | 3.08363800  | 0.34879400  |
| C | 1.14665400  | 3.59472500  | -0.82300400 |
| H | 0.60496400  | 4.31081000  | -1.42013100 |
| C | 2.41663100  | 3.20405500  | -1.21360000 |
| H | 2.83954100  | 3.64757500  | -2.10421200 |
| C | 3.14610700  | 2.26312200  | -0.50907500 |
| C | 2.54230600  | 1.69112400  | 0.63216100  |
| C | 4.50428500  | 1.19973900  | -2.34919000 |
| H | 4.06625400  | 1.85637300  | -3.10106100 |
| H | 5.51318300  | 0.93702100  | -2.67379000 |
| H | 3.90356700  | 0.29565200  | -2.31905300 |
| C | 5.40768900  | 3.17541500  | -1.12478200 |
| H | 5.03172200  | 3.82371400  | -1.91519000 |
| H | 5.41929400  | 3.74187000  | -0.19279100 |
| H | 6.43535600  | 2.90496600  | -1.37713100 |
| C | -0.50610400 | 0.87295900  | 2.36899300  |
| H | -1.29025800 | 1.42996700  | 1.86425000  |
| H | -0.32214400 | -0.03520800 | 1.79647700  |
| H | -0.86842700 | 0.58646400  | 3.35881700  |
| C | 0.47376100  | 2.95139500  | 3.39888700  |
| H | 1.34259300  | 3.61076900  | 3.44223000  |
| H | 0.26036400  | 2.60845500  | 4.41372800  |
| H | -0.37754400 | 3.52210700  | 3.04315200  |
| C | -1.33812300 | 4.47328300  | 0.09316600  |
| H | -1.55982300 | 4.18058000  | -0.93485100 |
| H | 4.80160800  | -0.62242100 | 1.46495400  |
| H | 5.67163400  | 1.64095500  | 0.84663200  |
| H | 6.07182000  | 0.46520900  | -0.38889000 |
| H | -2.26933000 | 4.60980300  | 0.63617500  |
| H | -0.77302500 | 5.40797900  | 0.09223100  |

#### INT-II-B

|    |             |             |             |
|----|-------------|-------------|-------------|
| Cl | 1.04853700  | -0.07225500 | -1.78049700 |
| O  | -5.43590400 | 1.01594700  | -0.82644800 |
| N  | -8.58668900 | 2.42416200  | -0.75194400 |
| N  | -8.94798800 | -1.37077200 | 1.36833200  |
| N  | -5.73073300 | -3.14013000 | 1.47386200  |
| C  | -8.07104200 | 1.45788200  | -0.37282300 |
| C  | -8.25921800 | -0.63701500 | 0.79429800  |
| C  | -5.55008700 | -2.15155600 | 0.89697000  |
| C  | -7.45637900 | 0.27998400  | 0.09337200  |
| C  | -6.08753200 | 0.06061000  | -0.14675200 |
| C  | -5.23041900 | -0.98618100 | 0.19083600  |
| C  | -3.90991300 | -0.69737700 | -0.30364400 |
| C  | -4.01716800 | 0.65129800  | -1.00029900 |
| C  | -3.77661200 | 0.56906900  | -2.50159500 |
| H  | -2.73814900 | 0.31303400  | -2.70472300 |
| H  | -3.99713600 | 1.53042000  | -2.96619900 |
| H  | -4.41386200 | -0.19530100 | -2.94501200 |
| C  | -3.21915000 | 1.76517600  | -0.33807400 |
| H  | -2.15770900 | 1.63506500  | -0.52943900 |
| H  | -3.38446300 | 1.77357000  | 0.73861200  |
| H  | -3.51979300 | 2.72702500  | -0.75313100 |
| C  | -2.81993300 | -1.50120100 | -0.18649100 |
| H  | -2.98894600 | -2.45016000 | 0.30752100  |
| C  | -1.49753500 | -1.22122200 | -0.64893000 |
| H  | -1.32130100 | -0.24219000 | -1.06750200 |

|   |             |             |             |
|---|-------------|-------------|-------------|
| C | -0.44258500 | -2.08058500 | -0.63835400 |
| C | -0.59018300 | -3.52571400 | -0.21422600 |
| H | -0.92089600 | -4.10623400 | -1.08367700 |
| H | -1.37610300 | -3.61947400 | 0.53341800  |
| C | 0.70270600  | -4.12417000 | 0.32379200  |
| H | 0.94686500  | -3.65428000 | 1.27917800  |
| C | 1.85878500  | -3.93013800 | -0.64827800 |
| H | 1.74630500  | -4.60281700 | -1.50825500 |
| H | 2.80366100  | -4.20446400 | -0.18072300 |
| C | 1.95718300  | -2.51605700 | -1.15924300 |
| C | 0.87512900  | -1.71357200 | -1.12803700 |
| C | 3.25699500  | -2.07874500 | -1.77658500 |
| H | 3.19696100  | -2.17634500 | -2.87233300 |
| H | 0.56410000  | -5.18695600 | 0.52786500  |
| O | 4.33088700  | -2.86296700 | -1.29053800 |
| C | 5.58301900  | -2.44870100 | -1.82357700 |
| H | 5.55427200  | -2.51468500 | -2.91861100 |
| H | 5.76090000  | -1.39748800 | -1.56285700 |
| C | 6.67098800  | -3.33429200 | -1.25941600 |
| H | 6.70987700  | -3.25634400 | -0.17208100 |
| H | 6.49709400  | -4.37772100 | -1.52634200 |
| H | 7.64049800  | -3.03413600 | -1.65989700 |
| H | 3.44435700  | -1.02233400 | -1.56207200 |
| O | 3.42257200  | 3.91238400  | -1.18034900 |
| N | 1.30307400  | 0.73341500  | 1.70508500  |
| C | 3.76179300  | -0.59600300 | 2.25697400  |
| C | 2.42999700  | -1.34528200 | 2.23172800  |
| C | 1.26313300  | -0.45788700 | 2.19533000  |
| C | 0.03097700  | 1.47247400  | 1.54905800  |
| H | -0.64743400 | 1.12406400  | 2.32208700  |
| H | -0.37050100 | 1.18061000  | 0.58080400  |
| C | 0.28763300  | 2.94966800  | 1.62873200  |
| H | -0.66434500 | 3.47744700  | 1.57307500  |
| H | 0.73136000  | 3.18429700  | 2.59913800  |
| C | 1.20772300  | 3.43275800  | 0.49880800  |
| C | 2.41040400  | 2.48837500  | 0.40096500  |
| C | 3.53619600  | 2.82107400  | -0.38636700 |
| C | 4.69027200  | 2.05007300  | -0.34117700 |
| H | 5.54885900  | 2.31411300  | -0.93796900 |
| C | 4.76545900  | 0.94681900  | 0.49869000  |
| H | 5.69507900  | 0.40128900  | 0.55553300  |
| C | 3.67802500  | 0.53548100  | 1.24142800  |
| C | 2.49237200  | 1.28512300  | 1.11700400  |
| C | 4.87974300  | -1.59560900 | 1.95817800  |
| H | 5.86338900  | -1.13647900 | 2.05121300  |
| H | 4.83368700  | -2.41406400 | 2.67842200  |
| H | 4.77752500  | -2.01580200 | 0.95813300  |
| C | 3.98357700  | 0.02215000  | 3.65151100  |
| H | 4.92506900  | 0.57111400  | 3.67090900  |
| H | 3.18457500  | 0.71481400  | 3.92083200  |
| H | 4.02473600  | -0.76282700 | 4.40907000  |
| C | 0.42748400  | 3.49056900  | -0.82677400 |
| H | 1.06350200  | 3.84841900  | -1.63237700 |
| H | 0.04435500  | 2.51301300  | -1.11538800 |
| H | -0.41870500 | 4.17203500  | -0.72333200 |
| C | 1.65796300  | 4.85359400  | 0.89560300  |
| H | 2.29125900  | 4.82275200  | 1.78369700  |
| H | 0.77250700  | 5.44662500  | 1.13290100  |
| H | 2.20075200  | 5.34905700  | 0.09805700  |
| C | 4.53275500  | 4.30594700  | -1.98173800 |
| H | 4.79632200  | 3.52585100  | -2.69880400 |
| H | 0.29541900  | -0.80759200 | 2.52966400  |
| H | 2.33694100  | -2.03991100 | 3.06703700  |
| H | 2.35631400  | -1.95003400 | 1.31588000  |
| H | 4.20833800  | 5.19497200  | -2.51484600 |
| H | 5.39990400  | 4.54584300  | -1.36309100 |

**TS-II-B**

|    |            |             |             |
|----|------------|-------------|-------------|
| Cl | 1.06442700 | -0.08993100 | -1.68502400 |
|----|------------|-------------|-------------|



|   |             |             |             |
|---|-------------|-------------|-------------|
| O | -5.44382300 | 0.96699300  | -0.85488400 |
| N | -8.67377500 | 2.21272500  | -0.96160900 |
| N | -8.95028600 | -1.63065900 | 1.08565400  |
| N | -5.70401700 | -3.22629300 | 1.38235500  |
| C | -8.12982900 | 1.27290500  | -0.56300900 |
| C | -8.26796500 | -0.85399300 | 0.56724400  |
| C | -5.51887000 | -2.22868900 | 0.82845400  |
| C | -7.47575600 | 0.12131000  | -0.07242900 |
| C | -6.09839400 | -0.01302000 | -0.23221000 |
| C | -5.20266400 | -1.03759200 | 0.15300000  |
| C | -3.89984200 | -0.68953100 | -0.25198300 |
| C | -4.00121700 | 0.66651700  | -0.92455000 |
| C | -3.64301200 | 0.65022000  | -2.40441500 |
| H | -2.57645100 | 0.48344800  | -2.53964200 |
| H | -3.90255000 | 1.61014200  | -2.84984500 |
| H | -4.18612200 | -0.14101700 | -2.91951900 |
| C | -3.30210200 | 1.77341300  | -0.14870300 |
| H | -2.22562800 | 1.63566500  | -0.18311100 |
| H | -3.61954900 | 1.77047600  | 0.89319300  |
| H | -3.53841400 | 2.73925500  | -0.59348800 |
| C | -2.76679200 | -1.46184200 | -0.05924300 |
| H | -2.92996200 | -2.40522600 | 0.44489000  |
| C | -1.47284000 | -1.14457600 | -0.46874500 |
| H | -1.31823600 | -0.20955900 | -0.98420100 |
| C | -0.35478700 | -1.96455500 | -0.31488500 |
| C | -0.51408000 | -3.33407600 | 0.31796600  |
| H | -0.99855500 | -3.98897900 | -0.41435200 |
| H | -1.19993100 | -3.26480000 | 1.16274500  |
| C | 0.79138700  | -3.96411700 | 0.78615300  |
| H | 1.10161200  | -3.49901300 | 1.72320300  |
| C | 1.90140800  | -3.81529800 | -0.24377000 |
| H | 1.67647800  | -4.41369400 | -1.13393800 |
| H | 2.84312300  | -4.19034300 | 0.15278200  |
| C | 2.08570200  | -2.36240200 | -0.66178700 |
| C | 0.90087700  | -1.62316600 | -0.83883500 |
| C | 3.23935500  | -2.08880100 | -1.61143200 |
| H | 2.90121200  | -2.21342300 | -2.65073300 |
| H | 0.62742600  | -5.01955400 | 1.00839400  |
| O | 4.29961800  | -2.98616300 | -1.35134300 |
| C | 5.43342600  | -2.73686300 | -2.17305400 |
| H | 5.14848500  | -2.83056000 | -3.22860900 |
| H | 5.77856500  | -1.70647700 | -2.01611300 |
| C | 6.51911500  | -3.72661300 | -1.81577200 |
| H | 6.80849000  | -3.62039700 | -0.76920400 |
| H | 6.17841600  | -4.75006500 | -1.97945800 |
| H | 7.40032600  | -3.55424800 | -2.43556800 |
| H | 3.58825200  | -1.05653800 | -1.50625700 |
| O | 3.01855000  | 4.17937500  | -1.11571000 |
| N | 1.50255000  | 0.66817000  | 1.77268200  |
| C | 4.07481400  | -0.52698400 | 1.88392400  |
| C | 2.79073100  | -1.33650400 | 1.95160800  |
| C | 1.62684800  | -0.60384500 | 2.15745200  |
| C | 0.16124900  | 1.25090500  | 1.76055100  |
| H | -0.40014800 | 0.81765200  | 2.58487300  |
| H | -0.32721400 | 0.94557000  | 0.83082200  |
| C | 0.25359900  | 2.74781500  | 1.87726600  |
| H | -0.74992600 | 3.17248300  | 1.91716300  |
| H | 0.74631400  | 2.99381300  | 2.82102000  |
| C | 1.02736400  | 3.37904700  | 0.70952400  |
| C | 2.29939000  | 2.56409400  | 0.44668700  |
| C | 3.29989100  | 3.04094100  | -0.42797800 |
| C | 4.50295200  | 2.36423500  | -0.58312500 |
| H | 5.26219200  | 2.73587200  | -1.25268100 |
| C | 4.74788900  | 1.21006200  | 0.14858200  |
| H | 5.70738000  | 0.72516500  | 0.04624300  |
| C | 3.79322600  | 0.67215700  | 0.98745300  |
| C | 2.54527400  | 1.32965200  | 1.07387100  |
| C | 5.23571500  | -1.39855400 | 1.40645100  |
| H | 6.17976400  | -0.85483900 | 1.43890800  |
| H | 5.33294900  | -2.25823100 | 2.07216900  |
| H | 5.07606600  | -1.77613400 | 0.40061900  |

|   |             |             |             |
|---|-------------|-------------|-------------|
| C | 4.41542300  | -0.00532900 | 3.30067200  |
| H | 5.33404800  | 0.58320100  | 3.26899300  |
| H | 3.61832800  | 0.62497800  | 3.69607700  |
| H | 4.56320400  | -0.84253700 | 3.98594100  |
| C | 0.13522800  | 3.42580300  | -0.54383000 |
| H | 0.66020700  | 3.89282400  | -1.37350900 |
| H | -0.16231700 | 2.42725200  | -0.86046500 |
| H | -0.76700900 | 4.00388900  | -0.33493600 |
| C | 1.36496000  | 4.81664700  | 1.15425300  |
| H | 2.07056900  | 4.80444800  | 1.98687300  |
| H | 0.44926800  | 5.30422400  | 1.49590900  |
| H | 1.78922500  | 5.40654600  | 0.34885500  |
| C | 3.99939400  | 4.71765000  | -1.99388900 |
| H | 4.23496200  | 4.01982200  | -2.80051800 |
| H | 0.72306600  | -1.05910800 | 2.53731000  |
| H | 2.85053200  | -2.28503000 | 2.47425800  |
| H | 2.48612600  | -1.79362400 | 0.60501600  |
| H | 3.55769700  | 5.61815900  | -2.41192200 |
| H | 4.91402200  | 4.97596400  | -1.45565700 |

#### JD1'(-2H)

|   |             |             |             |
|---|-------------|-------------|-------------|
| O | -2.71995500 | -1.51893800 | -0.11227200 |
| N | 0.89171400  | 1.63661500  | -0.10058900 |
| C | 2.88011000  | -0.47432400 | 0.07851100  |
| C | 3.17411300  | 0.94056900  | -0.33827000 |
| C | 2.22731600  | 1.87621900  | -0.37696400 |
| C | -0.05253800 | 2.70323500  | -0.39320900 |
| H | 0.43189200  | 3.65196000  | -0.16606900 |
| H | -0.30614600 | 2.70997300  | -1.46092900 |
| C | -1.28380500 | 2.51360900  | 0.45457000  |
| H | -1.98186100 | 3.33775100  | 0.29703200  |
| H | -0.98287700 | 2.53706800  | 1.50529600  |
| C | -1.99842900 | 1.18634700  | 0.15267400  |
| C | -0.96401300 | 0.05822800  | 0.01268300  |
| C | -1.37527300 | -1.28628400 | -0.06715900 |
| C | -0.45328200 | -2.32568900 | -0.11245600 |
| H | -0.77455300 | -3.35377800 | -0.16350800 |
| C | 0.90142900  | -2.03212400 | -0.07960700 |
| H | 1.60245500  | -2.85505100 | -0.08317400 |
| C | 1.37622600  | -0.73290300 | -0.04388900 |
| C | 0.42627600  | 0.31911300  | -0.03557600 |
| C | 3.70641000  | -1.43288900 | -0.79707600 |
| H | 3.62982600  | -2.46697100 | -0.46051700 |
| H | 4.76053800  | -1.15164300 | -0.74988800 |
| H | 3.38570600  | -1.38304800 | -1.83849200 |
| C | 3.30540700  | -0.66446100 | 1.55372900  |
| H | 3.12495200  | -1.69214500 | 1.87759500  |
| H | 2.74076700  | 0.00562500  | 2.20331600  |
| H | 4.36916400  | -0.44479900 | 1.67516300  |
| C | -2.81336500 | 1.33734400  | -1.14573900 |
| H | -3.32405500 | 0.41006200  | -1.39552300 |
| H | -2.17200200 | 1.60792500  | -1.98557600 |
| H | -3.56308100 | 2.12325300  | -1.02402800 |
| C | -2.95622900 | 0.94384000  | 1.33662000  |
| H | -2.39138900 | 0.74184100  | 2.24890000  |
| H | -3.55140400 | 1.84503000  | 1.50304500  |
| H | -3.63168800 | 0.11373100  | 1.15829300  |
| C | -3.18647900 | -2.85860900 | -0.16781800 |
| H | -2.87062500 | -3.42818200 | 0.70960800  |
| H | -2.83972200 | -3.36504000 | -1.07194300 |
| H | 2.45071100  | 2.90461700  | -0.62663400 |
| H | 4.19936800  | 1.21361000  | -0.55100000 |
| H | -4.27158000 | -2.79393000 | -0.18480600 |

#### TCF-A2(+2H)

|    |             |             |             |
|----|-------------|-------------|-------------|
| CI | 2.92150100  | -1.54907000 | -1.47249800 |
| O  | -3.57787400 | -1.41324000 | -0.26212100 |
| N  | -6.95176200 | -2.16042500 | 0.16336600  |

|   |             |             |             |
|---|-------------|-------------|-------------|
| N | -6.51708100 | 2.07123000  | 1.15014300  |
| N | -3.15119200 | 3.20600300  | 0.81042900  |
| C | -6.25502200 | -1.24556200 | 0.26576300  |
| C | -5.99698700 | 1.09853600  | 0.80916200  |
| C | -3.11538500 | 2.08873700  | 0.52836700  |
| C | -5.40719200 | -0.11781900 | 0.39431200  |
| C | -4.06092800 | -0.24021300 | 0.11916500  |
| C | -2.99903100 | 0.72761800  | 0.17031700  |
| C | -1.82071000 | 0.11731000  | -0.19411500 |
| C | -2.12388400 | -1.33212800 | -0.50400500 |
| C | -1.47698300 | -2.31273500 | 0.46656300  |
| H | -0.40025700 | -2.34647000 | 0.31667000  |
| H | -1.88310600 | -3.30775200 | 0.29055400  |
| H | -1.67676000 | -2.02113300 | 1.49662800  |
| C | -1.91537100 | -1.69985600 | -1.96809100 |
| H | -0.85641100 | -1.69880500 | -2.21617800 |
| H | -2.42629000 | -0.99115900 | -2.61834400 |
| H | -2.31232100 | -2.69848400 | -2.14471200 |
| C | -0.56056500 | 0.76477400  | -0.25699500 |
| H | -0.56386200 | 1.81248800  | 0.01267500  |
| C | 0.60467400  | 0.16625400  | -0.61412600 |
| H | 0.59726600  | -0.88035000 | -0.87301100 |
| C | 1.88686500  | 0.81157500  | -0.64993300 |
| C | 1.97389200  | 2.28812600  | -0.32621500 |
| H | 1.86494400  | 2.42380700  | 0.75470300  |
| H | 1.12518600  | 2.79585700  | -0.78706800 |
| C | 3.27245300  | 2.92265100  | -0.80596100 |
| H | 3.26392800  | 2.99090800  | -1.89796300 |
| C | 4.45788600  | 2.09017500  | -0.35080700 |
| H | 4.45516000  | 2.01775600  | 0.73891900  |
| H | 5.40165500  | 2.55328400  | -0.64264300 |
| C | 4.41223500  | 0.67476800  | -0.94026900 |
| C | 3.01243800  | 0.12246300  | -0.95769400 |
| C | 5.39396300  | -0.24537300 | -0.21415600 |
| H | 5.50002800  | -1.19783400 | -0.74210100 |
| H | 3.34702300  | 3.94106800  | -0.42226100 |
| O | 4.92989900  | -0.46713900 | 1.10267400  |
| C | 5.77954400  | -1.32492300 | 1.85381900  |
| H | 5.87332600  | -2.28914000 | 1.33781600  |
| H | 6.78306300  | -0.88425600 | 1.91495600  |
| C | 5.18962100  | -1.51016900 | 3.23386700  |
| H | 5.10728900  | -0.55296200 | 3.75107700  |
| H | 4.19659000  | -1.95808800 | 3.17209600  |
| H | 5.82687000  | -2.16756000 | 3.82741700  |
| H | 6.37773700  | 0.24035500  | -0.19831700 |
| H | 4.74838800  | 0.71278600  | -1.98426900 |

#### INT-II-C

|    |             |             |             |
|----|-------------|-------------|-------------|
| Cl | 1.31224400  | -0.53243400 | -1.71658200 |
| O  | -5.10822200 | 0.58267500  | -1.34710600 |
| N  | -8.30936300 | 1.88566400  | -1.70086700 |
| N  | -8.65172700 | -1.38374500 | 1.17401200  |
| N  | -5.49818900 | -2.97998800 | 1.78593300  |
| C  | -7.78600200 | 1.04420300  | -1.10669300 |
| C  | -7.95962900 | -0.76850000 | 0.48321100  |
| C  | -5.27254400 | -2.14588000 | 1.02077700  |
| C  | -7.15355400 | 0.01159300  | -0.37492700 |
| C  | -5.79198300 | -0.19771300 | -0.51889300 |
| C  | -4.91897600 | -1.15065900 | 0.08787400  |
| C  | -3.62902700 | -0.94976600 | -0.38659900 |
| C  | -3.67962400 | 0.21026600  | -1.35985300 |
| C  | -3.35635700 | -0.18248700 | -2.79584800 |
| H  | -2.30159300 | -0.42897500 | -2.89631000 |
| H  | -3.58134800 | 0.65459900  | -3.45549700 |
| H  | -3.94647200 | -1.04599200 | -3.09975600 |
| C  | -2.91980300 | 1.44176400  | -0.88629000 |
| H  | -1.84655900 | 1.26992000  | -0.90845300 |
| H  | -3.20449100 | 1.70167200  | 0.13173000  |
| H  | -3.15134500 | 2.27697600  | -1.54555000 |

|   |             |             |             |
|---|-------------|-------------|-------------|
| C | -2.50417000 | -1.70064500 | -0.01676200 |
| H | -2.68595600 | -2.50449400 | 0.68408100  |
| C | -1.22910500 | -1.47621100 | -0.47347700 |
| H | -1.07216900 | -0.66796100 | -1.16873300 |
| C | -0.08122200 | -2.21529300 | -0.11738600 |
| C | -0.20119400 | -3.37249500 | 0.85089600  |
| H | -0.59408200 | -4.24417700 | 0.31653000  |
| H | -0.93886400 | -3.12233500 | 1.61393500  |
| C | 1.11897900  | -3.72545800 | 1.52191600  |
| H | 1.39161100  | -2.93436500 | 2.22419700  |
| C | 2.22635900  | -3.89206900 | 0.49189500  |
| H | 2.02623000  | -4.77561900 | -0.12379400 |
| H | 3.18539000  | -4.06365900 | 0.97892800  |
| C | 2.33559900  | -2.68069000 | -0.40504200 |
| C | 1.15782100  | -1.91910700 | -0.65574300 |
| C | 3.52694400  | -2.35291700 | -0.97517200 |
| H | 3.63663800  | -1.50165500 | -1.63120200 |
| H | 1.00553000  | -4.64127400 | 2.10298400  |
| O | 4.61364100  | -3.07113700 | -0.74468900 |
| C | 5.81925600  | -2.71688400 | -1.46758300 |
| H | 5.85927800  | -3.35049500 | -2.35484000 |
| H | 5.74477600  | -1.67530900 | -1.77951000 |
| C | 7.00652400  | -2.94438000 | -0.56532200 |
| H | 6.95753300  | -2.29940000 | 0.31242100  |
| H | 7.05194400  | -3.98284000 | -0.23628100 |
| H | 7.92359600  | -2.71706900 | -1.11063900 |
| O | -0.53752600 | 3.32526700  | 0.67424700  |
| N | 3.36225600  | 0.64735400  | 1.42783400  |
| C | 4.72800500  | 1.79425800  | -0.89083900 |
| C | 5.22960300  | 0.63648400  | -0.07376100 |
| C | 4.56842600  | 0.15280300  | 0.97707100  |
| C | 2.64492500  | -0.08897200 | 2.45325200  |
| H | 3.37325300  | -0.63981300 | 3.04640300  |
| H | 1.97233400  | -0.82098400 | 1.99528500  |
| C | 1.87441400  | 0.88664000  | 3.30628600  |
| H | 1.37467900  | 0.36361500  | 4.12367900  |
| H | 2.58459600  | 1.58793100  | 3.75201800  |
| C | 0.82477800  | 1.65861900  | 2.48960000  |
| C | 1.42217100  | 2.08585500  | 1.13850900  |
| C | 0.72549800  | 2.97022500  | 0.29413700  |
| C | 1.29398700  | 3.45155000  | -0.87959400 |
| H | 0.75814600  | 4.13574200  | -1.51807800 |
| C | 2.57650300  | 3.05344000  | -1.22368700 |
| H | 3.01479400  | 3.46182500  | -2.12424000 |
| C | 3.30026000  | 2.15136600  | -0.46468800 |
| C | 2.69202100  | 1.63577600  | 0.70482300  |
| C | 4.78890400  | 1.41122300  | -2.38353600 |
| H | 4.55601600  | 2.25746700  | -3.03067700 |
| H | 5.79461200  | 1.06891200  | -2.63724000 |
| H | 4.08559800  | 0.60936800  | -2.60858400 |
| C | 5.65426400  | 3.00983200  | -0.65934800 |
| H | 5.33909500  | 3.86232800  | -1.26468200 |
| H | 5.63718400  | 3.30733700  | 0.38981000  |
| H | 6.68346900  | 2.75932100  | -0.92891400 |
| C | -0.40559500 | 0.75742000  | 2.28261800  |
| H | -1.16376200 | 1.25937300  | 1.68754500  |
| H | -0.13593300 | -0.16608300 | 1.77277900  |
| H | -0.84213600 | 0.49645200  | 3.24994200  |
| C | 0.43139600  | 2.87844100  | 3.34698400  |
| H | 1.26991400  | 3.57258500  | 3.43086800  |
| H | 0.17437600  | 2.53862500  | 4.35316400  |
| H | -0.41951200 | 3.41254500  | 2.93697700  |
| C | -1.20206800 | 4.36129000  | -0.03364700 |
| H | -0.62298600 | 5.28755800  | -0.01431600 |
| H | -1.39729700 | 4.08010800  | -1.07068900 |
| H | 4.95389800  | -0.67314300 | 1.55906400  |
| H | 6.19163600  | 0.21365000  | -0.33094400 |
| H | -2.14844300 | 4.51213900  | 0.47954000  |

|    |             |             |             |
|----|-------------|-------------|-------------|
| Cl | 1.37833900  | -0.52208500 | -1.84261600 |
| O  | -5.08029700 | 0.20573400  | -1.39733500 |
| N  | -8.33681800 | 1.23191600  | -1.94051600 |
| N  | -8.53788200 | -1.64533100 | 1.33273400  |
| N  | -5.23212900 | -2.98803600 | 2.12829600  |
| C  | -7.77304200 | 0.50535900  | -1.23605800 |
| C  | -7.87221500 | -1.08500200 | 0.56852800  |
| C  | -5.07972800 | -2.22437800 | 1.27127000  |
| C  | -7.09886000 | -0.38164500 | -0.37336400 |
| C  | -5.70661500 | -0.52909000 | -0.47019900 |
| C  | -4.79583400 | -1.32189200 | 0.23787200  |
| C  | -3.47677700 | -1.08262300 | -0.25937200 |
| C  | -3.62649100 | -0.04938200 | -1.36551100 |
| C  | -3.25995500 | -0.58446100 | -2.74328100 |
| H  | -2.18871400 | -0.76515500 | -2.80932500 |
| H  | -3.53847100 | 0.14304900  | -3.50575600 |
| H  | -3.78120200 | -1.52127000 | -2.93729600 |
| C  | -2.97698700 | 1.29160800  | -1.05538200 |
| H  | -1.89333800 | 1.20504600  | -1.03542300 |
| H  | -3.30918600 | 1.65896900  | -0.08572300 |
| H  | -3.25331500 | 2.01565100  | -1.82161800 |
| C  | -2.33187200 | -1.69072900 | 0.16943800  |
| H  | -2.45047900 | -2.43353200 | 0.94838900  |
| C  | -1.02731200 | -1.42395700 | -0.31639600 |
| H  | -0.93482500 | -0.64889100 | -1.06040700 |
| C  | 0.13370700  | -2.03484500 | 0.06411700  |
| C  | 0.16542300  | -3.17188700 | 1.05887300  |
| H  | 0.09857700  | -4.11898600 | 0.51074100  |
| H  | -0.70732100 | -3.12795400 | 1.70779200  |
| C  | 1.43318200  | -3.17200000 | 1.90435800  |
| H  | 1.42718500  | -2.30163400 | 2.56205700  |
| C  | 2.68217100  | -3.14987000 | 1.03504000  |
| H  | 2.85175800  | -4.13804000 | 0.59478800  |
| H  | 3.56651700  | -2.95326900 | 1.64436300  |
| C  | 2.61069500  | -2.13959100 | -0.08574300 |
| C  | 1.40540800  | -1.65904200 | -0.49764900 |
| C  | 3.86865300  | -1.73451600 | -0.68403700 |
| H  | 3.81678400  | -1.26611100 | -1.65780100 |
| H  | 1.45072500  | -4.04989200 | 2.55167600  |
| O  | 4.84698800  | -2.65534600 | -0.54065600 |
| C  | 5.97749700  | -2.55542000 | -1.42642800 |
| H  | 5.61108100  | -2.41916500 | -2.44665300 |
| H  | 6.56906400  | -1.67832900 | -1.15350700 |
| C  | 6.79170100  | -3.81880700 | -1.29074500 |
| H  | 7.14086100  | -3.94542900 | -0.26548300 |
| H  | 6.20290200  | -4.69216800 | -1.57212200 |
| H  | 7.66196300  | -3.76249400 | -1.94569400 |
| O  | -0.55458500 | 3.59136000  | -0.07264900 |
| N  | 2.87907300  | 0.72010900  | 1.63242600  |
| C  | 4.58975200  | 1.22927400  | -0.60717500 |
| C  | 4.65166600  | -0.04877500 | 0.21717300  |
| C  | 3.93550400  | -0.03593300 | 1.41836100  |
| C  | 2.05965200  | 0.46897400  | 2.82859400  |
| H  | 2.70682900  | 0.03383600  | 3.58561100  |
| H  | 1.29703900  | -0.26344300 | 2.56570800  |
| C  | 1.42673700  | 1.75120000  | 3.28845600  |
| H  | 0.87107000  | 1.56729400  | 4.20824400  |
| H  | 2.21042700  | 2.47712000  | 3.51901400  |
| C  | 0.47816700  | 2.32535900  | 2.22678600  |
| C  | 1.19826700  | 2.32982100  | 0.87250800  |
| C  | 0.68888600  | 3.06693800  | -0.21754700 |
| C  | 1.43486800  | 3.23617400  | -1.37693700 |
| H  | 1.05347900  | 3.82546400  | -2.19566100 |
| C  | 2.68817500  | 2.65401900  | -1.48666000 |
| H  | 3.25683700  | 2.82414000  | -2.38841000 |
| C  | 3.19600000  | 1.83745300  | -0.49516300 |
| C  | 2.41526900  | 1.65721600  | 0.66254100  |
| C  | 5.01901600  | 0.99351600  | -2.06083200 |
| H  | 5.19770900  | 1.93949300  | -2.56984800 |
| H  | 5.95473800  | 0.43526700  | -2.08522900 |
| H  | 4.27026900  | 0.44725700  | -2.63227900 |

|   |             |             |             |
|---|-------------|-------------|-------------|
| C | 5.59605100  | 2.22370200  | 0.02837500  |
| H | 5.57624200  | 3.16846700  | -0.51632300 |
| H | 5.34844700  | 2.42322700  | 1.07159900  |
| H | 6.60904000  | 1.81811700  | -0.01416400 |
| C | -0.81232700 | 1.48994800  | 2.16286500  |
| H | -1.50719500 | 1.92032300  | 1.44743300  |
| H | -0.61960400 | 0.46181000  | 1.85770300  |
| H | -1.29231900 | 1.47502800  | 3.14366500  |
| C | 0.14411600  | 3.75660800  | 2.69389300  |
| H | 1.02865200  | 4.39421500  | 2.64472300  |
| H | -0.18472700 | 3.71668700  | 3.73441700  |
| H | -0.64336000 | 4.20989400  | 2.10210100  |
| C | -1.09612500 | 4.38852700  | -1.11940800 |
| H | -0.48293900 | 5.27423100  | -1.29884100 |
| H | -1.19173400 | 3.81587400  | -2.04406900 |
| H | 4.16685400  | -0.74197000 | 2.20408900  |
| H | 5.64317000  | -0.47357500 | 0.30789100  |
| H | -2.08234600 | 4.69058800  | -0.77834900 |

#### INT-II-D

|    |             |             |             |
|----|-------------|-------------|-------------|
| Cl | 0.91679400  | -0.25441100 | -1.24027300 |
| O  | -5.49336900 | 1.14495200  | -0.84680600 |
| N  | -8.57513100 | 2.67223400  | -1.18958100 |
| N  | -9.35884900 | -1.12283300 | 0.81369300  |
| N  | -6.26024700 | -2.99102000 | 1.38063200  |
| C  | -8.15030000 | 1.68664900  | -0.75255000 |
| C  | -8.57180600 | -0.40846600 | 0.35308600  |
| C  | -5.96404600 | -2.01451000 | 0.83230800  |
| C  | -7.64737300 | 0.48510400  | -0.21698900 |
| C  | -6.26856300 | 0.21662500  | -0.26921700 |
| C  | -5.50631900 | -0.86554100 | 0.17599600  |
| C  | -4.12483300 | -0.63084100 | -0.13502700 |
| C  | -4.07916300 | 0.72262500  | -0.82735100 |
| C  | -3.64272500 | 0.64922100  | -2.28443400 |
| H  | -2.59214600 | 0.37487000  | -2.35739600 |
| H  | -3.78206000 | 1.62068400  | -2.75911600 |
| H  | -4.23202100 | -0.09538300 | -2.81859800 |
| C  | -3.33241500 | 1.78546500  | -0.03331500 |
| H  | -2.26969500 | 1.55791800  | 0.00163700  |
| H  | -3.70926500 | 1.83070200  | 0.98797400  |
| H  | -3.46295400 | 2.75960200  | -0.50479800 |
| C  | -3.08488400 | -1.46390000 | 0.14385100  |
| H  | -3.34075600 | -2.39110800 | 0.64145700  |
| C  | -1.71472900 | -1.22576000 | -0.16740400 |
| H  | -1.48409900 | -0.30926100 | -0.68742500 |
| C  | -0.66539000 | -2.04477300 | 0.11385700  |
| C  | -0.83177000 | -3.36287500 | 0.83519600  |
| H  | -0.95747600 | -4.16540100 | 0.09890000  |
| H  | -1.73848300 | -3.34698700 | 1.43701200  |
| C  | 0.36983000  | -3.68079400 | 1.71859300  |
| H  | 0.44627000  | -2.92422400 | 2.50541000  |
| C  | 1.64791300  | -3.69164000 | 0.89275200  |
| H  | 1.66466300  | -4.57303000 | 0.24269800  |
| H  | 2.52500800  | -3.79453800 | 1.53614500  |
| C  | 1.78826400  | -2.45274400 | 0.04369200  |
| C  | 0.69486500  | -1.72666500 | -0.27588500 |
| C  | 3.19739200  | -2.10566400 | -0.39149800 |
| H  | 3.15751700  | -1.37422200 | -1.20028300 |
| H  | 0.23257700  | -4.64382300 | 2.21206200  |
| O  | 3.90449100  | -3.25437300 | -0.81894200 |
| C  | 3.50124600  | -3.71372100 | -2.10981200 |
| H  | 2.42664200  | -3.92675600 | -2.10949500 |
| H  | 3.68122900  | -2.92052300 | -2.84537800 |
| C  | 4.29622800  | -4.95450800 | -2.44393900 |
| H  | 5.36552600  | -4.73835500 | -2.44989400 |
| H  | 4.10440400  | -5.74334700 | -1.71520100 |
| H  | 4.01354700  | -5.32246400 | -3.43132200 |
| O  | 2.48239300  | 4.40162700  | -0.97931800 |
| N  | 2.72832400  | 0.40044400  | 1.64017100  |

|   |             |             |             |
|---|-------------|-------------|-------------|
| C | 5.09668900  | -0.46791900 | 0.34860600  |
| C | 4.02166400  | -1.48411900 | 0.77605800  |
| C | 3.05052200  | -0.84593200 | 1.69920200  |
| C | 1.59107600  | 0.85784700  | 2.47814200  |
| H | 1.62354500  | 0.28739200  | 3.40216100  |
| H | 0.68236900  | 0.59106200  | 1.93959700  |
| C | 1.68504200  | 2.33590600  | 2.71796600  |
| H | 0.84648800  | 2.64025800  | 3.34439000  |
| H | 2.60068900  | 2.55530000  | 3.27219600  |
| C | 1.66522200  | 3.14167700  | 1.41168500  |
| C | 2.70665400  | 2.54941000  | 0.45885600  |
| C | 3.14214100  | 3.25687600  | -0.68389500 |
| C | 4.18628200  | 2.77634200  | -1.46328900 |
| H | 4.52550100  | 3.32897000  | -2.32510500 |
| C | 4.81859400  | 1.58478300  | -1.13430800 |
| H | 5.65163200  | 1.25902600  | -1.73804600 |
| C | 4.38776300  | 0.81153600  | -0.07560100 |
| C | 3.29323600  | 1.29316800  | 0.66821800  |
| C | 5.98804300  | -1.05043300 | -0.75004000 |
| H | 6.82552700  | -0.38356300 | -0.95273800 |
| H | 6.39472600  | -2.00647300 | -0.42394300 |
| H | 5.44738700  | -1.21351600 | -1.68071600 |
| C | 5.98526400  | -0.14790300 | 1.57099600  |
| H | 6.73883900  | 0.58952500  | 1.29588600  |
| H | 5.41070200  | 0.25627900  | 2.40540700  |
| H | 6.49326800  | -1.05137800 | 1.91280900  |
| C | 0.26566500  | 3.09686900  | 0.77354000  |
| H | 0.24393400  | 3.68739800  | -0.13988700 |
| H | -0.02735500 | 2.07937200  | 0.51810800  |
| H | -0.47260400 | 3.50377700  | 1.46691100  |
| C | 2.01050500  | 4.59004700  | 1.81267000  |
| H | 3.04848300  | 4.66294100  | 2.14188900  |
| H | 1.37103700  | 4.87995400  | 2.64862400  |
| H | 1.85449600  | 5.29128700  | 1.00109200  |
| C | 2.89805800  | 5.17254800  | -2.10295700 |
| H | 3.93209100  | 5.50496600  | -1.99153700 |
| H | 2.79108900  | 4.60624600  | -3.03033500 |
| H | 2.54460400  | -1.43298400 | 2.45237900  |
| H | 4.49126200  | -2.31386900 | 1.30664200  |
| H | 2.23851400  | 6.03528900  | -2.12599200 |

#### TS-II-D

|    |             |             |             |
|----|-------------|-------------|-------------|
| Cl | 1.10524800  | 0.45566900  | -2.09786800 |
| O  | 7.32656000  | -1.40272900 | -0.96169100 |
| N  | 10.44486600 | -2.86214000 | -1.24529300 |
| N  | 10.63515400 | -0.37127200 | 2.33023700  |
| N  | 7.46870200  | 1.38995500  | 2.88980100  |
| C  | 9.90462700  | -2.12572900 | -0.53160600 |
| C  | 9.99969600  | -0.74806100 | 1.43767700  |
| C  | 7.32522900  | 0.74089200  | 1.94066700  |
| C  | 9.26047700  | -1.23040400 | 0.34336500  |
| C  | 7.92379700  | -0.85807600 | 0.10848200  |
| C  | 7.05431200  | -0.00572500 | 0.78829300  |
| C  | 5.78195500  | 0.00788100  | 0.11650700  |
| C  | 5.93374400  | -0.92623500 | -1.07478600 |
| C  | 5.83974500  | -0.21931800 | -2.42024100 |
| H  | 4.82628200  | 0.13513400  | -2.59794000 |
| H  | 6.11143000  | -0.91001300 | -3.21886100 |
| H  | 6.51419200  | 0.63606000  | -2.44560900 |
| C  | 5.05781400  | -2.16904200 | -0.99029600 |
| H  | 4.00745600  | -1.90558600 | -1.09864400 |
| H  | 5.19307800  | -2.66155600 | -0.02780900 |
| H  | 5.32613700  | -2.86408200 | -1.78626400 |
| C  | 4.68310600  | 0.71600500  | 0.48808900  |
| H  | 4.79156700  | 1.33112200  | 1.37302200  |
| C  | 3.42110400  | 0.72136900  | -0.18115700 |
| H  | 3.33956500  | 0.12309100  | -1.07530100 |
| C  | 2.31173600  | 1.41361800  | 0.18545400  |
| C  | 2.26173600  | 2.30087800  | 1.40741200  |

|   |             |             |             |
|---|-------------|-------------|-------------|
| H | 2.48597200  | 3.33381600  | 1.11531900  |
| H | 3.02923400  | 2.00335400  | 2.11933600  |
| C | 0.88897300  | 2.25728300  | 2.07113900  |
| H | 0.69004900  | 1.23796200  | 2.41477900  |
| C | -0.19301900 | 2.68548700  | 1.08992400  |
| H | -0.15359200 | 3.76935800  | 0.93843300  |
| H | -1.18418900 | 2.48798700  | 1.50395400  |
| C | -0.07198200 | 1.98865800  | -0.24209100 |
| C | 1.08087900  | 1.38466300  | -0.58644900 |
| C | -1.30882400 | 1.98847100  | -1.11128200 |
| H | -1.00640300 | 1.88983000  | -2.15650000 |
| H | 0.87274600  | 2.90183600  | 2.95134900  |
| O | -1.99788600 | 3.23263200  | -0.96759600 |
| C | -1.39219900 | 4.30035700  | -1.69035300 |
| H | -0.34494400 | 4.41258900  | -1.38810100 |
| H | -1.40057800 | 4.06107300  | -2.76105600 |
| C | -2.16867200 | 5.56780600  | -1.41438700 |
| H | -3.21379000 | 5.45140100  | -1.70525200 |
| H | -2.12891900 | 5.82420900  | -0.35445100 |
| H | -1.74388300 | 6.39711900  | -1.98168400 |
| O | -6.75680800 | -3.45099800 | 0.37735900  |
| N | -2.45317400 | -1.36543700 | 0.10180200  |
| C | -3.29832900 | 0.45487100  | -1.90056300 |
| C | -2.30408000 | 0.86557400  | -0.79295200 |
| C | -1.80953600 | -0.22355000 | -0.06914500 |
| C | -1.90861800 | -2.32504300 | 1.07782200  |
| H | -0.82546500 | -2.30896100 | 0.98377200  |
| H | -2.16877800 | -1.98333900 | 2.08128600  |
| C | -2.46587900 | -3.69415500 | 0.80359200  |
| H | -2.03335900 | -4.40505600 | 1.50814200  |
| H | -2.16418700 | -4.00600500 | -0.19949700 |
| C | -3.99751900 | -3.73636200 | 0.91533200  |
| C | -4.58463400 | -2.57035500 | 0.11307500  |
| C | -5.96267000 | -2.50981700 | -0.19295600 |
| C | -6.46698600 | -1.51797900 | -1.02351200 |
| H | -7.51821700 | -1.48082000 | -1.26114600 |
| C | -5.61449600 | -0.56934200 | -1.57153600 |
| H | -6.03108700 | 0.16789300  | -2.24023500 |
| C | -4.26851000 | -0.54063600 | -1.26222100 |
| C | -3.78591300 | -1.52276800 | -0.37303700 |
| C | -4.02202300 | 1.66520900  | -2.49520000 |
| H | -4.68620600 | 1.35313800  | -3.30074500 |
| H | -3.30257000 | 2.36016400  | -2.92134200 |
| H | -4.60645500 | 2.20111900  | -1.74869900 |
| C | -2.55240900 | -0.27273200 | -3.04179800 |
| H | -3.26829800 | -0.60008600 | -3.79723500 |
| H | -2.01890800 | -1.14961900 | -2.67464300 |
| H | -1.82961500 | 0.38745400  | -3.52186200 |
| C | -4.42536900 | -3.64938600 | 2.39139700  |
| H | -5.50872400 | -3.69643600 | 2.47896700  |
| H | -4.09134800 | -2.72018200 | 2.85435000  |
| H | -3.99680200 | -4.48303700 | 2.95168800  |
| C | -4.42235200 | -5.09912500 | 0.33196400  |
| H | -4.22993100 | -5.13453100 | -0.74182900 |
| H | -3.82850400 | -5.88331500 | 0.80604000  |
| H | -5.47190700 | -5.31178100 | 0.50232700  |
| C | -8.14938100 | -3.45150700 | 0.08319000  |
| H | -8.32752000 | -3.59144100 | -0.98509600 |
| H | -8.62368800 | -2.52543300 | 0.41533700  |
| H | -0.87589700 | -0.14640300 | 0.47186100  |
| H | -3.13338700 | 1.39270700  | 0.17814900  |
| C | -4.91934900 | 1.07923400  | 1.65191400  |
| C | -5.87205800 | 1.54542900  | 2.54075400  |
| C | -5.93412300 | 2.91010200  | 2.79654000  |
| C | -5.04223600 | 3.76247100  | 2.15743600  |
| C | -4.11466900 | 3.22292000  | 1.28217100  |
| N | -4.06670200 | 1.90967300  | 1.04698800  |
| H | -6.66978900 | 3.30398300  | 3.48455000  |
| H | -4.83446800 | 0.02925700  | 1.40739300  |
| H | -6.54955700 | 0.85144100  | 3.01658200  |
| H | -5.06200500 | 4.82876900  | 2.33018600  |



|   |             |             |            |
|---|-------------|-------------|------------|
| H | -3.39355100 | 3.81999100  | 0.74349000 |
| H | -8.56584200 | -4.29021200 | 0.63412700 |

#### INT-II-E

|    |             |             |             |
|----|-------------|-------------|-------------|
| Cl | 1.45171200  | 0.95192700  | -1.85807500 |
| O  | 7.78628800  | -0.86383300 | -1.37274900 |
| N  | 11.01620700 | -1.85868500 | -2.10771400 |
| N  | 10.95966900 | -1.13196700 | 2.19202000  |
| N  | 7.65309200  | -0.03023700 | 3.31114800  |
| C  | 10.40766100 | -1.53982500 | -1.17409600 |
| C  | 10.36722000 | -1.13579500 | 1.19621900  |
| C  | 7.57568900  | -0.20431200 | 2.16811000  |
| C  | 9.68208900  | -1.15344500 | -0.03132100 |
| C  | 8.32365300  | -0.80225200 | -0.14536800 |
| C  | 7.38175000  | -0.38570500 | 0.79413000  |
| C  | 6.12359800  | -0.15417600 | 0.13419800  |
| C  | 6.36402900  | -0.46783900 | -1.33475900 |
| C  | 6.24209700  | 0.74637100  | -2.24559100 |
| H  | 5.20861000  | 1.08303700  | -2.29948800 |
| H  | 6.57651600  | 0.48816300  | -3.25066800 |
| H  | 6.85298000  | 1.56546400  | -1.86725900 |
| C  | 5.57893000  | -1.67204000 | -1.83673000 |
| H  | 4.51416000  | -1.44884600 | -1.86788600 |
| H  | 5.73380000  | -2.52544500 | -1.17720700 |
| H  | 5.90899400  | -1.93494700 | -2.84205900 |
| C  | 4.97195100  | 0.26155900  | 0.72318200  |
| H  | 5.02374200  | 0.43736900  | 1.79075700  |
| C  | 3.72397900  | 0.49487900  | 0.06734700  |
| H  | 3.69341300  | 0.33860300  | -0.99969800 |
| C  | 2.57250700  | 0.91352400  | 0.65380100  |
| C  | 2.47114900  | 1.18042500  | 2.13874300  |
| H  | 2.72799900  | 2.22793700  | 2.33724000  |
| H  | 3.19847900  | 0.57448800  | 2.67632200  |
| C  | 1.07060900  | 0.90231500  | 2.67172300  |
| H  | 0.84332500  | -0.16115400 | 2.55273300  |
| C  | 0.04287500  | 1.72849800  | 1.91366000  |
| H  | 0.14217000  | 2.78404300  | 2.18904600  |
| H  | -0.96737900 | 1.44733800  | 2.20948400  |
| C  | 0.18320400  | 1.57779600  | 0.41888800  |
| C  | 1.35933100  | 1.17841900  | -0.10174200 |
| C  | -1.02744300 | 1.87884200  | -0.43540600 |
| H  | -0.68580900 | 2.26922000  | -1.39220000 |
| H  | 1.02068300  | 1.12644100  | 3.73837000  |
| O  | -1.82954000 | 2.92162600  | 0.19164000  |
| C  | -1.26625600 | 4.24352700  | 0.16118200  |
| H  | -1.69638000 | 4.76146000  | 1.01878500  |
| H  | -0.18725600 | 4.17581100  | 0.31858900  |
| C  | -1.57860700 | 4.98338000  | -1.12475900 |
| H  | -1.13389900 | 4.49316500  | -1.99079800 |
| H  | -2.65564500 | 5.05296200  | -1.28010600 |
| H  | -1.17220100 | 5.99508400  | -1.06852300 |
| O  | -7.60829400 | -2.11419300 | -0.45597200 |
| N  | -2.91609200 | -1.33591500 | 0.11480500  |
| C  | -2.83671900 | 0.62269500  | -1.91131500 |
| C  | -1.94411000 | 0.71020400  | -0.67451000 |
| C  | -1.98528700 | -0.31817100 | 0.18119500  |
| C  | -2.87102500 | -2.33995800 | 1.17272500  |
| H  | -1.83085100 | -2.62870900 | 1.31683000  |
| H  | -3.22870100 | -1.91235800 | 2.11644100  |
| C  | -3.70616700 | -3.52764700 | 0.76858300  |
| H  | -3.63783800 | -4.30471800 | 1.53142800  |
| H  | -3.29515900 | -3.94176100 | -0.15572400 |
| C  | -5.18416300 | -3.16134600 | 0.55267300  |
| C  | -5.26704900 | -1.87550600 | -0.28021900 |
| C  | -6.48706000 | -1.43512100 | -0.83010300 |
| C  | -6.54049700 | -0.34773300 | -1.69482800 |
| H  | -7.47616300 | -0.02357400 | -2.12146500 |
| C  | -5.37077400 | 0.31966000  | -2.02943000 |
| H  | -5.43316500 | 1.13605900  | -2.73331600 |

|   |             |             |             |
|---|-------------|-------------|-------------|
| C | -4.15001800 | -0.02958900 | -1.48079500 |
| C | -4.12242600 | -1.10066900 | -0.55609600 |
| C | -3.06229900 | 1.97590700  | -2.59024400 |
| H | -3.64081800 | 1.85275800  | -3.50474600 |
| H | -2.11162500 | 2.41908900  | -2.88071600 |
| H | -3.58134300 | 2.68429000  | -1.94710900 |
| C | -2.14185600 | -0.30868700 | -2.93616300 |
| H | -2.76571600 | -0.42072800 | -3.82550900 |
| H | -1.97022000 | -1.29576000 | -2.50714500 |
| H | -1.17762700 | 0.10743100  | -3.23249200 |
| C | -5.87562800 | -2.99089200 | 1.91675100  |
| H | -6.91148400 | -2.68286900 | 1.79218800  |
| H | -5.37057300 | -2.24411700 | 2.52835700  |
| H | -5.85908800 | -3.93798900 | 2.46112700  |
| C | -5.81398000 | -4.35398100 | -0.19466900 |
| H | -5.40194500 | -4.43433000 | -1.20235300 |
| H | -5.57566300 | -5.27565800 | 0.34110800  |
| H | -6.89317700 | -4.26824300 | -0.26903600 |
| C | -8.86619800 | -1.70232400 | -0.97250500 |
| H | -8.89807000 | -1.78938500 | -2.06098600 |
| H | -9.09607500 | -0.67368500 | -0.68408600 |
| H | -1.29311800 | -0.41254200 | 1.00478600  |
| H | -3.24050000 | 2.45560000  | 0.98628800  |
| C | -5.24741400 | 2.14589100  | 0.68379700  |
| C | -6.38768700 | 1.50135600  | 1.11638000  |
| C | -6.32294000 | 0.72324200  | 2.26377300  |
| C | -5.12613700 | 0.62412700  | 2.96750300  |
| C | -4.01891200 | 1.29029900  | 2.49422200  |
| N | -4.10775600 | 2.02460500  | 1.37600700  |
| H | -7.19956700 | 0.19440200  | 2.60991700  |
| H | -5.20812700 | 2.75648800  | -0.20318700 |
| H | -7.30007200 | 1.59556400  | 0.55009200  |
| H | -5.04868100 | 0.03325500  | 3.86710800  |
| H | -3.05327800 | 1.25327400  | 2.97237200  |
| H | -9.60023300 | -2.37354300 | -0.53436400 |

#### TS-II-E

|    |             |             |             |
|----|-------------|-------------|-------------|
| Cl | 1.68455900  | 1.92332300  | -0.97734800 |
| O  | 8.09908800  | 0.54866700  | -1.31490500 |
| N  | 11.45215100 | 0.56573300  | -2.15799600 |
| N  | 11.02172500 | -2.51533100 | 0.89986200  |
| N  | 7.55665100  | -2.79059500 | 2.03295300  |
| C  | 10.75262600 | -0.00807800 | -1.43432400 |
| C  | 10.50402400 | -1.70560600 | 0.25356200  |
| C  | 7.57460600  | -1.95864500 | 1.22740100  |
| C  | 9.91307500  | -0.71344000 | -0.54980200 |
| C  | 8.54199400  | -0.41485700 | -0.49711400 |
| C  | 7.49598100  | -0.94145400 | 0.26757100  |
| C  | 6.27699300  | -0.27403500 | -0.07762100 |
| C  | 6.64653800  | 0.74699700  | -1.14216600 |
| C  | 6.47140100  | 2.18960100  | -0.68640700 |
| H  | 5.41677000  | 2.42799000  | -0.56365200 |
| H  | 6.89630100  | 2.86376500  | -1.43020200 |
| H  | 6.97486300  | 2.34869600  | 0.26664600  |
| C  | 6.02083500  | 0.46833800  | -2.50215900 |
| H  | 4.94579300  | 0.63437900  | -2.47187200 |
| H  | 6.20323600  | -0.56410600 | -2.79851300 |
| H  | 6.45417900  | 1.13460700  | -3.24823400 |
| C  | 5.04606900  | -0.51890100 | 0.45661100  |
| H  | 5.00445700  | -1.28686100 | 1.21898300  |
| C  | 3.83945700  | 0.14579900  | 0.10793400  |
| H  | 3.90388800  | 0.92236800  | -0.63744900 |
| C  | 2.60492200  | -0.09164900 | 0.63779700  |
| C  | 2.38458100  | -1.15777000 | 1.68993800  |
| H  | 2.60406000  | -0.74068900 | 2.67964200  |
| H  | 3.08858400  | -1.97451600 | 1.53562300  |
| C  | 0.96037900  | -1.69889000 | 1.68299500  |
| H  | 0.77697800  | -2.23955800 | 0.75019300  |
| C  | -0.03269800 | -0.55451400 | 1.80948800  |

|   |              |             |             |
|---|--------------|-------------|-------------|
| H | 0.07559600   | -0.09388400 | 2.79820100  |
| H | -1.05392200  | -0.92221700 | 1.76848400  |
| C | 0.18923600   | 0.49975000  | 0.74765000  |
| C | 1.44358900   | 0.67790300  | 0.25725500  |
| C | -0.92898700  | 1.34420300  | 0.30434200  |
| H | -0.59499100  | 2.29968800  | -0.07034200 |
| H | 0.82453600   | -2.40702600 | 2.50149000  |
| O | -1.61705500  | 2.00711500  | 1.79855700  |
| C | -0.73999000  | 2.66735800  | 2.73413400  |
| H | -1.16369600  | 2.50561600  | 3.72607100  |
| H | 0.23779600   | 2.18370300  | 2.69771200  |
| C | -0.63216300  | 4.13872400  | 2.40277900  |
| H | -0.20628600  | 4.28640400  | 1.40967100  |
| H | -1.61062800  | 4.61787900  | 2.43779300  |
| H | 0.02235700   | 4.62905600  | 3.12528000  |
| O | -8.18891500  | -0.64749200 | -1.20972000 |
| N | -3.42137500  | -1.06019300 | -1.01204100 |
| C | -3.02095300  | 1.73696200  | -1.18910800 |
| C | -2.08150700  | 0.82749200  | -0.39643600 |
| C | -2.30517500  | -0.50694600 | -0.48205000 |
| C | -3.54248800  | -2.51764400 | -0.93447200 |
| H | -2.57706600  | -2.94684100 | -1.19591300 |
| H | -3.77137800  | -2.80757100 | 0.09566100  |
| C | -4.61580200  | -2.98261000 | -1.88187900 |
| H | -4.67773900  | -4.07141300 | -1.85859100 |
| H | -4.33554500  | -2.69404500 | -2.89827000 |
| C | -5.99213400  | -2.39015100 | -1.54126200 |
| C | -5.84254500  | -0.88312400 | -1.30090000 |
| C | -6.96935500  | -0.04215700 | -1.20345800 |
| C | -6.83139700  | 1.33530100  | -1.08061200 |
| H | -7.69726300  | 1.97441000  | -1.01327100 |
| C | -5.56502700  | 1.90246900  | -1.06715400 |
| H | -5.48854000  | 2.97764800  | -1.00959400 |
| C | -4.42091700  | 1.12743100  | -1.11468000 |
| C | -4.58118400  | -0.27397700 | -1.17020400 |
| C | -3.00283000  | 3.19214300  | -0.71082000 |
| H | -3.61811800  | 3.81164100  | -1.36170600 |
| H | -1.99452500  | 3.60057800  | -0.75962600 |
| H | -3.35956700  | 3.29786400  | 0.31182100  |
| C | -2.55854300  | 1.71714000  | -2.66745100 |
| H | -3.22247000  | 2.33148900  | -3.27871400 |
| H | -2.56568800  | 0.70192700  | -3.06433200 |
| H | -1.54285500  | 2.10991100  | -2.75061000 |
| C | -6.56284500  | -3.08936400 | -0.29455900 |
| H | -7.52942700  | -2.66958800 | -0.02426400 |
| H | -5.89815600  | -2.98199400 | 0.56232100  |
| H | -6.69197000  | -4.15570000 | -0.49382900 |
| C | -6.89279800  | -2.68544200 | -2.75711400 |
| H | -6.56047100  | -2.11612200 | -3.62723600 |
| H | -6.81962100  | -3.74746400 | -3.00190700 |
| H | -7.93366000  | -2.44717900 | -2.56586100 |
| C | -9.35848300  | 0.15640000  | -1.12918200 |
| H | -9.42519500  | 0.84669500  | -1.97315000 |
| H | -9.38878800  | 0.72079300  | -0.19421500 |
| H | -1.58692700  | -1.22761500 | -0.12578500 |
| H | -2.29958200  | 1.32652100  | 2.24176000  |
| C | -4.63812000  | 0.83550700  | 2.19215800  |
| C | -5.76890100  | 0.03907300  | 2.26740100  |
| C | -5.66516100  | -1.20295100 | 2.87725100  |
| C | -4.43906600  | -1.59820600 | 3.39871100  |
| C | -3.35808700  | -0.73990400 | 3.28099700  |
| N | -3.45526100  | 0.45141700  | 2.68209400  |
| H | -6.52526300  | -1.85499200 | 2.94385200  |
| H | -4.66855800  | 1.80293900  | 1.71234600  |
| H | -6.69814300  | 0.38318200  | 1.83859400  |
| H | -4.31729300  | -2.55546900 | 3.88488400  |
| H | -2.38516700  | -1.00843300 | 3.66975000  |
| H | -10.19547200 | -0.53611600 | -1.16056400 |

Type-II product (TCF1-based)

|    |              |             |             |
|----|--------------|-------------|-------------|
| Cl | -1.24306900  | -2.11162700 | -0.02711700 |
| O  | -7.71383700  | -1.23357300 | 0.42944000  |
| O  | 9.22791400   | -0.20105100 | 0.04239700  |
| N  | -11.12826400 | -1.68122100 | 0.83904500  |
| N  | -10.58772200 | 2.53517200  | -0.15036500 |
| N  | -7.10880500  | 3.36148500  | -0.65365100 |
| N  | 4.59543700   | 0.92534100  | 0.53808700  |
| C  | -10.40062000 | -0.82042100 | 0.58094800  |
| C  | -10.08663000 | 1.50953300  | 0.03293300  |
| C  | -7.12742900  | 2.23450300  | -0.39970700 |
| C  | -9.52003000  | 0.23859100  | 0.26488900  |
| C  | -8.15174200  | 0.00103600  | 0.19336500  |
| C  | -7.06280400  | 0.86213100  | -0.09843000 |
| C  | -5.86965200  | 0.12842500  | -0.04323600 |
| C  | -6.24399500  | -1.29817900 | 0.31063800  |
| C  | -5.73048000  | -1.74384800 | 1.67393300  |
| H  | -4.64877400  | -1.85823500 | 1.65749700  |
| H  | -6.17743900  | -2.70331600 | 1.93215200  |
| H  | -5.99064300  | -1.01171600 | 2.43737500  |
| C  | -5.95404300  | -2.29913700 | -0.80050000 |
| H  | -4.88176100  | -2.43651600 | -0.92280600 |
| H  | -6.36958100  | -1.95067700 | -1.74519700 |
| H  | -6.40058600  | -3.25994700 | -0.54669100 |
| C  | -4.59697700  | 0.63808200  | -0.27335600 |
| H  | -4.54972600  | 1.69337100  | -0.50839500 |
| C  | -3.41902100  | -0.09246600 | -0.21529000 |
| H  | -3.48736700  | -1.14040000 | 0.02630300  |
| C  | -2.13300800  | 0.41530500  | -0.41735700 |
| C  | -1.94486400  | 1.88148100  | -0.74029300 |
| H  | -2.04977900  | 2.46957600  | 0.17827300  |
| H  | -2.74449300  | 2.20661600  | -1.40638900 |
| C  | -0.59848000  | 2.16039200  | -1.38432500 |
| H  | -0.57270800  | 1.71783100  | -2.38386300 |
| C  | 0.52624000   | 1.56974900  | -0.54710600 |
| H  | 0.57476800   | 2.09563800  | 0.41308500  |
| H  | 1.48235600   | 1.73356300  | -1.04490500 |
| C  | 0.34017000   | 0.08568900  | -0.32253400 |
| C  | -0.99203800  | -0.38647800 | -0.29351700 |
| C  | 1.41159400   | -0.78900100 | -0.18691400 |
| H  | 1.14080100   | -1.83399500 | -0.21487700 |
| C  | 3.74598400   | -1.73877500 | -0.25644300 |
| C  | 2.79386600   | -0.55936300 | -0.05169500 |
| C  | 3.29819600   | 0.64387000  | 0.38516800  |
| H  | 2.64024300   | 1.43559000  | 0.70014500  |
| C  | 4.98330500   | 2.17083200  | 1.19778900  |
| H  | 4.11570900   | 2.82583800  | 1.21383700  |
| H  | 5.25871900   | 1.95107100  | 2.23243100  |
| C  | 6.13117200   | 2.78569000  | 0.43943300  |
| H  | 6.39207100   | 3.74957700  | 0.87819800  |
| H  | 5.80612500   | 2.97207100  | -0.58720100 |
| C  | 7.37199500   | 1.87909800  | 0.43789000  |
| C  | 6.95479200   | 0.42304100  | 0.18357000  |
| C  | 7.92371500   | -0.57100300 | -0.06037400 |
| C  | 7.55127200   | -1.87073100 | -0.38401000 |
| H  | 8.29519800   | -2.62652700 | -0.57943100 |
| C  | 6.20935800   | -2.20399200 | -0.46238100 |
| H  | 5.95009100   | -3.21946900 | -0.72598200 |
| C  | 5.20764800   | -1.28758700 | -0.19017200 |
| C  | 5.60496000   | 0.01376500  | 0.16651200  |
| C  | 3.50041100   | -2.78603700 | 0.85341000  |
| H  | 4.15407400   | -3.64799800 | 0.71834700  |
| H  | 2.46959300   | -3.14207300 | 0.83757000  |
| H  | 3.69930000   | -2.35408900 | 1.83476200  |
| C  | 3.47377300   | -2.37268300 | -1.63662200 |
| H  | 4.10305500   | -3.24579800 | -1.80366300 |
| H  | 3.66646000   | -1.65160700 | -2.43170600 |
| H  | 2.43539800   | -2.69595200 | -1.71354000 |
| C  | 8.08964600   | 2.00125300  | 1.79570000  |
| H  | 8.96853800   | 1.36210100  | 1.83036500  |
| H  | 7.43336100   | 1.71894900  | 2.62008700  |
| H  | 8.40700700   | 3.03454200  | 1.95259800  |

|   |             |             |             |
|---|-------------|-------------|-------------|
| C | 8.28610000  | 2.41339400  | -0.68278500 |
| H | 7.83019700  | 2.24635600  | -1.66042900 |
| H | 8.41375100  | 3.49012900  | -0.55083700 |
| H | 9.26548500  | 1.94721000  | -0.67336800 |
| C | 10.24341200 | -1.16074300 | -0.22340200 |
| H | 10.17518300 | -1.53712800 | -1.24648200 |
| H | 10.19247100 | -1.99688400 | 0.47755000  |
| H | -0.45267200 | 3.23482900  | -1.50229800 |
| H | 11.18582100 | -0.63581100 | -0.09239100 |

**TCF1-based (Path II-c)**

**INT-II-A(c)**

|    |             |             |             |
|----|-------------|-------------|-------------|
| Cl | -1.49802300 | -3.67011500 | 0.28824200  |
| O  | 4.84767700  | -2.13122000 | 0.66434700  |
| N  | 8.22994900  | -2.01527200 | 1.44910400  |
| N  | 7.49402400  | 1.38057400  | -1.19336500 |
| N  | 4.09188500  | 1.52703500  | -2.28246700 |
| C  | 7.47476000  | -1.41295200 | 0.81546800  |
| C  | 7.05118300  | 0.46248600  | -0.64991300 |
| C  | 4.13281700  | 0.61982300  | -1.57077300 |
| C  | 6.55676500  | -0.66894800 | 0.03653100  |
| C  | 5.23074200  | -1.06121900 | -0.02136500 |
| C  | 4.11493400  | -0.50285500 | -0.71881500 |
| C  | 2.98507500  | -1.25971500 | -0.44414900 |
| C  | 3.40517300  | -2.38434300 | 0.48090500  |
| C  | 3.29575200  | -3.76650500 | -0.15158100 |
| H  | 2.25340600  | -4.05335500 | -0.27174000 |
| H  | 3.78310400  | -4.49482400 | 0.49529300  |
| H  | 3.77517600  | -3.77908200 | -1.12939600 |
| C  | 2.78387400  | -2.30450500 | 1.86950100  |
| H  | 1.71650400  | -2.50765000 | 1.82635400  |
| H  | 2.93153700  | -1.31515300 | 2.29928900  |
| H  | 3.25282500  | -3.04592000 | 2.51490400  |
| C  | 1.69649900  | -0.99843800 | -0.93655400 |
| H  | 1.60122600  | -0.12107500 | -1.56069100 |
| C  | 0.58561100  | -1.75267500 | -0.66084200 |
| H  | 0.70467300  | -2.63365500 | -0.05155100 |
| C  | -0.72837200 | -1.47799900 | -1.10601100 |
| C  | -0.98585800 | -0.25076300 | -1.95237200 |
| H  | -0.64794000 | -0.44795500 | -2.97564300 |
| H  | -0.37177900 | 0.56225000  | -1.56954900 |
| C  | -2.44387300 | 0.18238900  | -1.95148900 |
| H  | -2.69112200 | 0.61047200  | -0.97911000 |
| C  | -3.36015000 | -0.99820300 | -2.23645800 |
| H  | -3.17911900 | -1.37469800 | -3.24926100 |
| H  | -4.40617600 | -0.69924800 | -2.19432800 |
| C  | -3.12059000 | -2.11190000 | -1.24558200 |
| C  | -1.78491500 | -2.30097800 | -0.77544300 |
| C  | -4.14549200 | -2.89628400 | -0.82197900 |
| H  | -4.00401900 | -3.69406600 | -0.10421800 |
| H  | -2.59605000 | 0.96814700  | -2.69127800 |
| O  | -5.37946500 | -2.71625000 | -1.27625500 |
| C  | -6.40799100 | -3.56629900 | -0.70766000 |
| H  | -6.12240300 | -4.60683800 | -0.87374900 |
| H  | -6.44991500 | -3.37748800 | 0.36674800  |
| C  | -7.71434500 | -3.23317600 | -1.38247500 |
| H  | -7.98163300 | -2.18894200 | -1.21784400 |
| H  | -7.65551600 | -3.41699500 | -2.45565800 |
| H  | -8.50492100 | -3.86016200 | -0.96846800 |
| O  | -4.08178500 | 1.71606000  | 2.19048400  |
| N  | 0.49759300  | 1.94812900  | 0.75310900  |
| C  | -0.18094100 | 3.86817700  | -1.36238400 |
| C  | 1.16323100  | 3.13959800  | -1.26101500 |
| C  | 1.51155000  | 2.80877900  | 0.16966400  |
| H  | 1.63489500  | 3.72726600  | 0.76332100  |
| C  | 0.90951800  | 1.32252100  | 1.99254300  |
| H  | 1.91238800  | 0.92047900  | 1.84230800  |

|   |             |             |             |
|---|-------------|-------------|-------------|
| H | 0.98146900  | 2.06240700  | 2.80459800  |
| C | -0.05343800 | 0.22002000  | 2.34703400  |
| H | 0.27477600  | -0.29486900 | 3.25209700  |
| H | -0.04533500 | -0.50976900 | 1.53717500  |
| C | -1.48691100 | 0.72961100  | 2.55142800  |
| C | -1.83292800 | 1.76030600  | 1.46425600  |
| C | -3.15905600 | 2.20258900  | 1.30739200  |
| C | -3.51514000 | 3.10525300  | 0.31189100  |
| H | -4.53501300 | 3.43339700  | 0.19112900  |
| C | -2.53071900 | 3.59305000  | -0.53072000 |
| H | -2.82126500 | 4.29458000  | -1.30101900 |
| C | -1.20013300 | 3.23194100  | -0.41247700 |
| C | -0.84048400 | 2.31663000  | 0.61250200  |
| C | 0.00746500  | 5.35121600  | -0.99070300 |
| H | -0.94022700 | 5.88810300  | -1.04939400 |
| H | 0.71381700  | 5.82759200  | -1.67537200 |
| H | 0.38759000  | 5.46154100  | 0.02556500  |
| C | -0.65027400 | 3.78300000  | -2.82380200 |
| H | -1.55274700 | 4.36735300  | -3.00206500 |
| H | -0.85274100 | 2.74931500  | -3.10716300 |
| H | 0.12921500  | 4.17046500  | -3.48387900 |
| C | -1.59866200 | 1.37413900  | 3.94610200  |
| H | -2.59884500 | 1.76862000  | 4.11408200  |
| H | -0.88691700 | 2.19294000  | 4.05982800  |
| H | -1.38671700 | 0.62962100  | 4.71815800  |
| C | -2.38687000 | -0.52188400 | 2.49204700  |
| H | -2.45547700 | -0.89622600 | 1.47102000  |
| H | -1.94304100 | -1.30823000 | 3.10728400  |
| H | -3.39116100 | -0.32824500 | 2.85309000  |
| C | -5.44274100 | 2.08712300  | 2.03920700  |
| H | -5.83348800 | 1.78302100  | 1.06490000  |
| H | -5.58130400 | 3.16406700  | 2.16316400  |
| H | 2.46152700  | 2.27607900  | 0.21367400  |
| H | 1.12292700  | 2.21114000  | -1.83389800 |
| H | 1.95062600  | 3.74879000  | -1.70768200 |
| H | -5.98239200 | 1.56271600  | 2.82413600  |

#### TS-II-A(c)

|    |             |             |             |
|----|-------------|-------------|-------------|
| Cl | -0.92403200 | -3.09651800 | 1.29193000  |
| O  | 5.40609800  | -1.24808500 | 0.99524400  |
| N  | 8.84074200  | -1.07599700 | 1.38212500  |
| N  | 7.97866600  | 0.82418400  | -2.45405600 |
| N  | 4.39194100  | 0.93221600  | -3.11401400 |
| C  | 8.04858300  | -0.75231600 | 0.60253900  |
| C  | 7.56059600  | 0.29615000  | -1.51293100 |
| C  | 4.52824100  | 0.37031500  | -2.11168900 |
| C  | 7.09218300  | -0.35300800 | -0.35414200 |
| C  | 5.73569900  | -0.61134100 | -0.13335400 |
| C  | 4.58992200  | -0.31717300 | -0.89121000 |
| C  | 3.44023600  | -0.79735600 | -0.20456600 |
| C  | 3.94898600  | -1.45993600 | 1.06489000  |
| C  | 3.73927300  | -2.96927800 | 1.06875900  |
| H  | 2.67971400  | -3.21046900 | 1.12893300  |
| H  | 4.24434500  | -3.40687600 | 1.92959500  |
| H  | 4.14208500  | -3.40887100 | 0.15719200  |
| C  | 3.48617900  | -0.79229500 | 2.35195300  |
| H  | 2.43449900  | -1.00244700 | 2.53496600  |
| H  | 3.63175900  | 0.28601000  | 2.30203500  |
| H  | 4.05962000  | -1.18734200 | 3.19000500  |
| C  | 2.14868400  | -0.68499200 | -0.63235300 |
| H  | 2.00420000  | -0.21019900 | -1.59348100 |
| C  | 0.97608200  | -1.08490500 | 0.09891700  |
| H  | 1.14436000  | -1.78169000 | 0.90848500  |
| C  | -0.27380600 | -1.31887400 | -0.62928000 |
| C  | -0.52541100 | -0.50206900 | -1.87626300 |
| H  | 0.06706200  | -0.91708600 | -2.69889200 |
| H  | -0.15299900 | 0.51218500  | -1.71694200 |
| C  | -1.99412600 | -0.44527500 | -2.26859400 |
| H  | -2.52705000 | 0.19610800  | -1.56514900 |

|   |             |             |             |
|---|-------------|-------------|-------------|
| C | -2.61172800 | -1.83804700 | -2.25991200 |
| H | -2.13862000 | -2.45205800 | -3.03423000 |
| H | -3.67322200 | -1.79496000 | -2.49922600 |
| C | -2.42947200 | -2.50516000 | -0.91764400 |
| C | -1.20464300 | -2.21089000 | -0.21059100 |
| C | -3.37816900 | -3.31434500 | -0.40713900 |
| H | -3.27366100 | -3.79264000 | 0.55787200  |
| H | -2.09624900 | 0.00825900  | -3.25528100 |
| O | -4.51554600 | -3.56502700 | -1.07360000 |
| C | -5.51484800 | -4.31144800 | -0.34793200 |
| H | -5.07759800 | -5.26003600 | -0.02614100 |
| H | -5.79914000 | -3.73947600 | 0.53884300  |
| C | -6.69503500 | -4.53019800 | -1.26187500 |
| H | -7.12051400 | -3.57782800 | -1.58025600 |
| H | -6.40137600 | -5.09649100 | -2.14647000 |
| H | -7.46633400 | -5.09219000 | -0.73362700 |
| O | -5.05913600 | 2.49274200  | -0.58628600 |
| N | -0.95928300 | 1.31590200  | 1.62534000  |
| C | 0.45609900  | 3.36357000  | 0.33885700  |
| C | 1.20700600  | 2.07987400  | 0.70829600  |
| C | 0.38495600  | 1.13283400  | 1.53870600  |
| H | 0.81837400  | 0.80174700  | 2.47610000  |
| C | -1.69733900 | 0.66090600  | 2.70340900  |
| H | -1.02508800 | -0.03861300 | 3.19506900  |
| H | -1.98643800 | 1.42061900  | 3.43416200  |
| C | -2.90106500 | -0.05343000 | 2.14047700  |
| H | -3.44244800 | -0.54560100 | 2.94982500  |
| H | -2.55450200 | -0.83196700 | 1.46402400  |
| C | -3.86321600 | 0.87811400  | 1.38884500  |
| C | -3.06682400 | 1.84363800  | 0.49976600  |
| C | -3.71190600 | 2.63376600  | -0.47587400 |
| C | -2.99732300 | 3.51336000  | -1.27990000 |
| H | -3.49381900 | 4.08567400  | -2.04724500 |
| C | -1.63770300 | 3.69804400  | -1.06869400 |
| H | -1.11727600 | 4.42924100  | -1.66945400 |
| C | -0.96170400 | 3.00520200  | -0.08415700 |
| C | -1.68164800 | 2.04591000  | 0.66029700  |
| C | 0.36762200  | 4.28794400  | 1.57091400  |
| H | -0.17333100 | 5.20052500  | 1.31857300  |
| H | 1.36902500  | 4.56180800  | 1.90966400  |
| H | -0.15284800 | 3.80505900  | 2.39887800  |
| C | 1.24804300  | 4.07267900  | -0.76227100 |
| H | 0.83902000  | 5.05844600  | -0.98325200 |
| H | 1.25830600  | 3.48670200  | -1.68257300 |
| H | 2.28019100  | 4.21204000  | -0.43660100 |
| C | -4.68245900 | 1.70184800  | 2.40201600  |
| H | -5.36222700 | 2.37922600  | 1.88842100  |
| H | -4.03670700 | 2.29657100  | 3.04934200  |
| H | -5.27307000 | 1.03171000  | 3.03086400  |
| C | -4.81293200 | -0.04850200 | 0.60313200  |
| H | -4.29970700 | -0.51742200 | -0.23426000 |
| H | -5.15051000 | -0.84602600 | 1.26887200  |
| H | -5.68344000 | 0.47605100  | 0.22600600  |
| C | -5.75601900 | 3.24387100  | -1.57222000 |
| H | -5.40505300 | 3.00054300  | -2.57750400 |
| H | -5.65264300 | 4.31747300  | -1.39943100 |
| H | 0.63182900  | -0.05078600 | 0.85339300  |
| H | 1.53820000  | 1.57902000  | -0.20546900 |
| H | 2.12037500  | 2.32270500  | 1.25267300  |
| H | -6.80042300 | 2.95987800  | -1.47483600 |

#### INT-II-B(c)

|    |             |             |             |
|----|-------------|-------------|-------------|
| Cl | -1.87458100 | -2.68505500 | 1.76768800  |
| O  | 4.25193700  | -2.09876500 | 1.23180200  |
| N  | 7.55980300  | -3.00507500 | 1.60723700  |
| N  | 7.20891300  | -1.53788500 | -2.48388400 |
| N  | 3.72083700  | -0.56408300 | -3.24537600 |
| C  | 6.87906200  | -2.57155900 | 0.77431900  |
| C  | 6.67575700  | -1.76237100 | -1.47920800 |

|   |             |             |             |
|---|-------------|-------------|-------------|
| C | 3.75326800  | -0.91162100 | -2.13951900 |
| C | 6.06649600  | -2.04376600 | -0.24525800 |
| C | 4.69610000  | -1.80494100 | -0.00323400 |
| C | 3.67730200  | -1.30730700 | -0.80206100 |
| C | 2.44661600  | -1.25256900 | -0.02691800 |
| C | 2.81101800  | -1.80258700 | 1.34693200  |
| C | 2.12915600  | -3.12584700 | 1.66176900  |
| H | 1.05678700  | -2.98822300 | 1.78477100  |
| H | 2.53490500  | -3.54189700 | 2.58452300  |
| H | 2.29368300  | -3.83448400 | 0.85050900  |
| C | 2.68504700  | -0.78074400 | 2.46796300  |
| H | 1.64604000  | -0.48858100 | 2.61114000  |
| H | 3.27007600  | 0.10745900  | 2.23117200  |
| H | 3.05772900  | -1.20282200 | 3.40150700  |
| C | 1.25859400  | -0.79671000 | -0.44625300 |
| H | 1.20571500  | -0.43782300 | -1.46798600 |
| C | -0.00702900 | -0.67927300 | 0.35576400  |
| H | 0.08432200  | -1.16943900 | 1.31696800  |
| C | -1.22945200 | -1.17043900 | -0.37067500 |
| C | -1.47299100 | -0.55947200 | -1.73030800 |
| H | -0.88208100 | -1.09604500 | -2.48115200 |
| H | -1.09307900 | 0.46371600  | -1.72601800 |
| C | -2.94284200 | -0.57624900 | -2.12321300 |
| H | -3.49550700 | 0.11180700  | -1.47854000 |
| C | -3.51339700 | -1.98063100 | -1.96701600 |
| H | -3.01137400 | -2.65326500 | -2.67215400 |
| H | -4.57379800 | -2.00277800 | -2.21500200 |
| C | -3.31832300 | -2.49646100 | -0.55988400 |
| C | -2.12096500 | -2.03899100 | 0.13214400  |
| C | -4.20430300 | -3.33896300 | -0.00588200 |
| H | -4.08839300 | -3.73142600 | 0.99554100  |
| H | -3.06318100 | -0.22854800 | -3.15062300 |
| O | -5.29629400 | -3.76187100 | -0.68637100 |
| C | -6.20341600 | -4.59164400 | 0.05864300  |
| H | -5.66437000 | -5.47348600 | 0.41698900  |
| H | -6.56427600 | -4.03250200 | 0.92685000  |
| C | -7.34383200 | -4.98215100 | -0.85034700 |
| H | -7.87855100 | -4.09935900 | -1.20339600 |
| H | -6.97781200 | -5.53776300 | -1.71474200 |
| H | -8.04644400 | -5.61531700 | -0.30676700 |
| O | -3.80885200 | 2.82426500  | -0.67527000 |
| N | 0.43372100  | 2.96519800  | 1.57525700  |
| C | 1.85187300  | 3.35751900  | -0.84501600 |
| C | 2.43048500  | 2.52090700  | 0.30741200  |
| C | 1.70421100  | 2.76037200  | 1.56113700  |
| H | 2.20814700  | 2.77509000  | 2.51807600  |
| C | -0.27988000 | 3.19740400  | 2.84408300  |
| H | 0.42576100  | 3.04293400  | 3.65503800  |
| H | -0.60208500 | 4.23821300  | 2.84938700  |
| C | -1.44200500 | 2.23807400  | 2.89704600  |
| H | -1.93418100 | 2.32190400  | 3.86566100  |
| H | -1.05583800 | 1.21921400  | 2.81966300  |
| C | -2.46639200 | 2.50531200  | 1.78236500  |
| C | -1.74272600 | 2.80584900  | 0.46265200  |
| C | -2.46159400 | 2.93323400  | -0.74736100 |
| C | -1.80037000 | 3.15449700  | -1.94959400 |
| H | -2.35565500 | 3.23028500  | -2.87096000 |
| C | -0.41842500 | 3.26018400  | -1.98767400 |
| H | 0.06309500  | 3.41825100  | -2.94079500 |
| C | 0.34022600  | 3.17211700  | -0.83657800 |
| C | -0.35149000 | 2.97122500  | 0.37156100  |
| C | 2.17637800  | 4.84779300  | -0.62920000 |
| H | 1.76701100  | 5.43927700  | -1.44796500 |
| H | 3.25694200  | 4.99912600  | -0.59981400 |
| H | 1.75266900  | 5.22704400  | 0.30236600  |
| C | 2.49553700  | 2.87654400  | -2.14765800 |
| H | 2.20752400  | 3.50345700  | -2.99055900 |
| H | 2.22472400  | 1.84521000  | -2.37060800 |
| H | 3.58124700  | 2.92895100  | -2.05759900 |
| C | -3.33981000 | 3.71144900  | 2.18076000  |
| H | -4.07176200 | 3.93432900  | 1.40903100  |



|   |             |            |             |
|---|-------------|------------|-------------|
| H | -2.73775000 | 4.60609000 | 2.34505000  |
| H | -3.87165000 | 3.48399500 | 3.10629100  |
| C | -3.33672000 | 1.23760600 | 1.68464800  |
| H | -2.75693600 | 0.39385100 | 1.31186000  |
| H | -3.69634700 | 0.98412400 | 2.68386400  |
| H | -4.19439500 | 1.37888700 | 1.03617100  |
| C | -4.58565300 | 2.98808800 | -1.85913700 |
| H | -4.34327900 | 2.22361400 | -2.59923600 |
| H | -4.43805500 | 3.97993400 | -2.29066300 |
| H | -0.18510500 | 0.38309700 | 0.56839900  |
| H | 2.33132000  | 1.44905500 | 0.07743400  |
| H | 3.49148800  | 2.71577000 | 0.45517600  |
| H | -5.61974100 | 2.87562200 | -1.54671400 |

**TS-II-B(c)**

|    |             |             |             |
|----|-------------|-------------|-------------|
| Cl | -0.92403200 | -3.09651800 | 1.29193000  |
| O  | 5.40609800  | -1.24808500 | 0.99524400  |
| N  | 8.84074200  | -1.07599700 | 1.38212500  |
| N  | 7.97866600  | 0.82418400  | -2.45405600 |
| N  | 4.39194100  | 0.93221600  | -3.11401400 |
| C  | 8.04858300  | -0.75231600 | 0.60253900  |
| C  | 7.56059600  | 0.29615000  | -1.51293100 |
| C  | 4.52824100  | 0.37031500  | -2.11168900 |
| C  | 7.09218300  | -0.35300800 | -0.35414200 |
| C  | 5.73569900  | -0.61134100 | -0.13335400 |
| C  | 4.58992200  | -0.31717300 | -0.89121000 |
| C  | 3.44023600  | -0.79735600 | -0.20456600 |
| C  | 3.94898600  | -1.45993600 | 1.06489000  |
| C  | 3.73927300  | -2.96927800 | 1.06875900  |
| H  | 2.67971400  | -3.21046900 | 1.12893300  |
| H  | 4.24434500  | -3.40687600 | 1.92959500  |
| H  | 4.14208500  | -3.40887100 | 0.15719200  |
| C  | 3.48617900  | -0.79229500 | 2.35195300  |
| H  | 2.43449900  | -1.00244700 | 2.53496600  |
| H  | 3.63175900  | 0.28601000  | 2.30203500  |
| H  | 4.05962000  | -1.18734200 | 3.19000500  |
| C  | 2.14868400  | -0.68499200 | -0.63235300 |
| H  | 2.00420000  | -0.21019900 | -1.59348100 |
| C  | 0.97608200  | -1.08490500 | 0.09891700  |
| H  | 1.14436000  | -1.78169000 | 0.90848500  |
| C  | -0.27380600 | -1.31887400 | -0.62928000 |
| C  | -0.52541100 | -0.50206900 | -1.87626300 |
| H  | 0.06706200  | -0.91708600 | -2.69889200 |
| H  | -0.15299900 | 0.51218500  | -1.71694200 |
| C  | -1.99412600 | -0.44527500 | -2.26859400 |
| H  | -2.52705000 | 0.19610800  | -1.56514900 |
| C  | -2.61172800 | -1.83804700 | -2.25991200 |
| H  | -2.13862000 | -2.45205800 | -3.03423000 |
| H  | -3.67322200 | -1.79496000 | -2.49922600 |
| C  | -2.42947200 | -2.50516000 | -0.91764400 |
| C  | -1.20464300 | -2.21089000 | -0.21059100 |
| C  | -3.37816900 | -3.31434500 | -0.40713900 |
| H  | -3.27366100 | -3.79264000 | 0.55787200  |
| H  | -2.09624900 | 0.00825900  | -3.25528100 |
| O  | -4.51554600 | -3.56502700 | -1.07360000 |
| C  | -5.51484800 | -4.31144800 | -0.34793200 |
| H  | -5.07759800 | -5.26003600 | -0.02614100 |
| H  | -5.79914000 | -3.73947600 | 0.53884300  |
| C  | -6.69503500 | -4.53019800 | -1.26187500 |
| H  | -7.12051400 | -3.57782800 | -1.58025600 |
| H  | -6.40137600 | -5.09649100 | -2.14647000 |
| H  | -7.46633400 | -5.09219000 | -0.73362700 |
| O  | -5.05913600 | 2.49274200  | -0.58628600 |
| N  | -0.95928300 | 1.31590200  | 1.62534000  |
| C  | 0.45609900  | 3.36357000  | 0.33885700  |
| C  | 1.20700600  | 2.07987400  | 0.70829600  |
| C  | 0.38495600  | 1.13283400  | 1.53870600  |
| H  | 0.81837400  | 0.80174700  | 2.47610000  |
| C  | -1.69733900 | 0.66090600  | 2.70340900  |

|   |             |             |             |
|---|-------------|-------------|-------------|
| H | -1.02508800 | -0.03861300 | 3.19506900  |
| H | -1.98643800 | 1.42061900  | 3.43416200  |
| C | -2.90106500 | -0.05343000 | 2.14047700  |
| H | -3.44244800 | -0.54560100 | 2.94982500  |
| H | -2.55450200 | -0.83196700 | 1.46402400  |
| C | -3.86321600 | 0.87811400  | 1.38884500  |
| C | -3.06682400 | 1.84363800  | 0.49976600  |
| C | -3.71190600 | 2.63376600  | -0.47587400 |
| C | -2.99732300 | 3.51336000  | -1.27990000 |
| H | -3.49381900 | 4.08567400  | -2.04724500 |
| C | -1.63770300 | 3.69804400  | -1.06869400 |
| H | -1.11727600 | 4.42924100  | -1.66945400 |
| C | -0.96170400 | 3.00520200  | -0.08415700 |
| C | -1.68164800 | 2.04591000  | 0.66029700  |
| C | 0.36762200  | 4.28794400  | 1.57091400  |
| H | -0.17333100 | 5.20052500  | 1.31857300  |
| H | 1.36902500  | 4.56180800  | 1.90966400  |
| H | -0.15284800 | 3.80505900  | 2.39887800  |
| C | 1.24804300  | 4.07267900  | -0.76227100 |
| H | 0.83902000  | 5.05844600  | -0.98325200 |
| H | 1.25830600  | 3.48670200  | -1.68257300 |
| H | 2.28019100  | 4.21204000  | -0.43660100 |
| C | -4.68245900 | 1.70184800  | 2.40201600  |
| H | -5.36222700 | 2.37922600  | 1.88842100  |
| H | -4.03670700 | 2.29657100  | 3.04934200  |
| H | -5.27307000 | 1.03171000  | 3.03086400  |
| C | -4.81293200 | -0.04850200 | 0.60313200  |
| H | -4.29970700 | -0.51742200 | -0.23426000 |
| H | -5.15051000 | -0.84602600 | 1.26887200  |
| H | -5.68344000 | 0.47605100  | 0.22600600  |
| C | -5.75601900 | 3.24387100  | -1.57222000 |
| H | -5.40505300 | 3.00054300  | -2.57750400 |
| H | -5.65264300 | 4.31747300  | -1.39943100 |
| H | 0.63182900  | -0.05078600 | 0.85339300  |
| H | 1.53820000  | 1.57902000  | -0.20546900 |
| H | 2.12037500  | 2.32270500  | 1.25267300  |
| H | -6.80042300 | 2.95987800  | -1.47483600 |

#### TCF-A2(+2H, c)

|    |             |             |             |
|----|-------------|-------------|-------------|
| CI | 1.56549200  | -2.40475500 | -2.10660100 |
| O  | -4.37522700 | -1.76743700 | -1.16981900 |
| N  | -7.63091000 | -2.95014900 | -1.08602200 |
| N  | -7.03266000 | -0.84311100 | 2.68775900  |
| N  | -3.63348800 | 0.30308300  | 3.04699000  |
| C  | -6.91728100 | -2.35218000 | -0.39981400 |
| C  | -6.57156400 | -1.18584300 | 1.68418600  |
| C  | -3.69548400 | -0.13260400 | 1.97848000  |
| C  | -6.05434400 | -1.62038600 | 0.44610100  |
| C  | -4.75397100 | -1.34317000 | 0.03429900  |
| C  | -3.68954100 | -0.66069400 | 0.67533900  |
| C  | -2.57709600 | -0.63752300 | -0.17954500 |
| C  | -2.95894300 | -1.43148400 | -1.41236700 |
| C  | -2.22361400 | -2.76223200 | -1.51602100 |
| H  | -1.17194200 | -2.60668300 | -1.74071700 |
| H  | -2.66621800 | -3.35379100 | -2.31715200 |
| H  | -2.30260500 | -3.31465800 | -0.58035100 |
| C  | -2.92104600 | -0.62053600 | -2.69875400 |
| H  | -1.89554700 | -0.36612700 | -2.95864500 |
| H  | -3.49432300 | 0.29928200  | -2.59148300 |
| H  | -3.34454900 | -1.20952500 | -3.51142600 |
| C  | -1.39580400 | 0.08783600  | 0.00997900  |
| H  | -1.28415700 | 0.46607800  | 1.02113400  |
| C  | -0.07426400 | -0.25564700 | -0.65742300 |
| H  | -0.22664200 | -0.66732900 | -1.64843000 |
| C  | 0.83390600  | -1.13704000 | 0.15807400  |
| C  | 0.95328700  | -0.78464400 | 1.62239400  |
| H  | 0.09774900  | -1.20013600 | 2.16676300  |
| H  | 0.87493600  | 0.30052200  | 1.72386200  |
| C  | 2.25369700  | -1.26962300 | 2.24724800  |

|   |             |             |             |
|---|-------------|-------------|-------------|
| H | 3.08369000  | -0.67054100 | 1.86338700  |
| C | 2.49148300  | -2.73706900 | 1.90996400  |
| H | 1.69287900  | -3.34258600 | 2.35431400  |
| H | 3.42885200  | -3.09126800 | 2.33634700  |
| C | 2.50829700  | -2.95033000 | 0.41496000  |
| C | 1.60329300  | -2.10983300 | -0.35629200 |
| C | 3.30550600  | -3.87158200 | -0.14810800 |
| H | 3.33172200  | -4.04355100 | -1.21595500 |
| H | 2.22527500  | -1.12664600 | 3.32867700  |
| O | 4.11519400  | -4.65938600 | 0.59837900  |
| C | 4.99733100  | -5.51545100 | -0.14748700 |
| H | 4.40029600  | -6.14630100 | -0.81247800 |
| H | 5.65709700  | -4.89572600 | -0.76172300 |
| C | 5.78839700  | -6.35003400 | 0.83066400  |
| H | 6.38163100  | -5.71608200 | 1.49097100  |
| H | 5.12557100  | -6.96584000 | 1.43999200  |
| H | 6.46642000  | -7.00891500 | 0.28636900  |
| O | 3.96331600  | 2.52422600  | 1.58626100  |
| N | 0.56600500  | 3.01419200  | -1.77072600 |
| C | -1.43083800 | 3.57740600  | 0.12423800  |
| C | -1.70084100 | 2.70565300  | -1.10293600 |
| C | -0.70664600 | 2.75636100  | -2.07472600 |
| H | -0.90681800 | 2.55658900  | -3.11903000 |
| C | 1.59067900  | 3.08591100  | -2.80913300 |
| H | 1.11009100  | 2.90909300  | -3.76837400 |
| H | 2.00109700  | 4.09725800  | -2.81922500 |
| C | 2.65189200  | 2.05418200  | -2.51289200 |
| H | 3.40476400  | 2.05843800  | -3.30202300 |
| H | 2.18397400  | 1.06704100  | -2.52168500 |
| C | 3.34444400  | 2.29037000  | -1.15834300 |
| C | 2.31451500  | 2.70325500  | -0.09515600 |
| C | 2.66148200  | 2.75325200  | 1.27380700  |
| C | 1.70635200  | 3.01539600  | 2.24811500  |
| H | 1.97630600  | 3.02649400  | 3.29210700  |
| C | 0.38749900  | 3.25542200  | 1.88705600  |
| H | -0.33883000 | 3.43638200  | 2.66564800  |
| C | -0.00120300 | 3.27571500  | 0.56235400  |
| C | 0.98410700  | 3.02431900  | -0.41439300 |
| C | -1.53269500 | 5.06728700  | -0.27446700 |
| H | -1.32892000 | 5.69916200  | 0.59183600  |
| H | -2.53683900 | 5.29294700  | -0.63926000 |
| H | -0.81830400 | 5.32156000  | -1.05787000 |
| C | -2.46531600 | 3.30138300  | 1.21610800  |
| H | -2.37531100 | 4.01429600  | 2.03573100  |
| H | -2.37545200 | 2.30042100  | 1.62931400  |
| H | -3.46832400 | 3.40717500  | 0.79977600  |
| C | 4.40109700  | 3.39999600  | -1.31530800 |
| H | 4.89868700  | 3.59962200  | -0.36894100 |
| H | 3.95137700  | 4.33059000  | -1.66482600 |
| H | 5.15416200  | 3.09115900  | -2.04347300 |
| C | 4.03389500  | 0.95635600  | -0.80701500 |
| H | 3.29390900  | 0.18453400  | -0.59306500 |
| H | 4.61986100  | 0.62811500  | -1.66817300 |
| H | 4.69742900  | 1.04567600  | 0.04597900  |
| C | 4.34079800  | 2.43275900  | 2.95510800  |
| H | 3.78734600  | 1.64031600  | 3.46366500  |
| H | 4.18431600  | 3.38045200  | 3.47480600  |
| H | 0.46807200  | 0.67850100  | -0.80239100 |
| H | -1.65580200 | 1.33850300  | -0.61827700 |
| H | -2.71845400 | 2.70685500  | -1.48039200 |
| H | 5.40044600  | 2.19238600  | 2.95256800  |

#### TCF5-based (Path I)

##### TCF-A6

|    |             |             |            |
|----|-------------|-------------|------------|
| Cl | -2.92744600 | -1.17032700 | 0.43788700 |
| O  | 3.51092300  | -0.25313700 | 0.18094100 |
| N  | 6.95176200  | -0.65250200 | 0.35596400 |

|   |              |             |             |
|---|--------------|-------------|-------------|
| N | 6.28218900   | 3.35713800  | -1.25136400 |
| N | 2.79784200   | 4.17215100  | -1.42338800 |
| C | 6.19866800   | 0.16005200  | 0.02956500  |
| C | 5.81263400   | 2.37833800  | -0.85731700 |
| C | 2.83480800   | 3.08088900  | -1.05038500 |
| C | 5.28230800   | 1.16196300  | -0.37128500 |
| C | 3.92375800   | 0.92354600  | -0.28056700 |
| C | 2.80046200   | 1.74818100  | -0.59309700 |
| C | 1.63178600   | 1.04401700  | -0.34332500 |
| C | 2.02931000   | -0.34753500 | 0.13247900  |
| C | 0.33134300   | 1.55037700  | -0.46924000 |
| H | 0.25557800   | 2.57876300  | -0.79596000 |
| C | -0.80763400  | 0.82584100  | -0.21697500 |
| H | -0.69410800  | -0.20013600 | 0.09210300  |
| C | -2.13087300  | 1.29610400  | -0.35240300 |
| C | -2.38075900  | 2.72676900  | -0.77950400 |
| H | -2.23443800  | 2.80592600  | -1.86218200 |
| H | -1.63010900  | 3.37021900  | -0.31971900 |
| C | -3.77180400  | 3.21834100  | -0.40554800 |
| H | -3.84079900  | 3.32162500  | 0.68074200  |
| C | -4.83274100  | 2.23964400  | -0.88711300 |
| H | -4.83808000  | 2.21079400  | -1.98210300 |
| H | -5.82731500  | 2.55808100  | -0.57856600 |
| C | -4.56971900  | 0.84990000  | -0.35645900 |
| C | -3.21423600  | 0.46626700  | -0.13092300 |
| C | -5.60265400  | -0.00509000 | -0.12804400 |
| H | -5.45103300  | -1.00675400 | 0.25322500  |
| H | -3.94505200  | 4.20525200  | -0.83571200 |
| O | -6.85285400  | 0.35557200  | -0.37650400 |
| C | -7.88672800  | -0.60801100 | -0.04386700 |
| H | -7.64512100  | -1.55179600 | -0.53603700 |
| H | -7.87393300  | -0.75783600 | 1.03726400  |
| C | -9.20787100  | -0.05568100 | -0.51482300 |
| H | -9.42959400  | 0.89296200  | -0.02517300 |
| H | -9.20268000  | 0.09722400  | -1.59439900 |
| H | -10.00179600 | -0.76247300 | -0.27065800 |
| C | 1.55585900   | -0.60157600 | 1.55772700  |
| C | 0.59496100   | -1.56308500 | 1.85347000  |
| C | 2.05337300   | 0.20072000  | 2.58546900  |
| C | 0.13144700   | -1.72958300 | 3.15301900  |
| H | 0.19151400   | -2.19165300 | 1.07401000  |
| C | 1.60934000   | 0.04289600  | 3.88875700  |
| H | 2.79672000   | 0.95728000  | 2.37608900  |
| C | 0.65124100   | -0.92272100 | 4.14497400  |
| H | -0.61730200  | -2.47188900 | 3.39020200  |
| H | 1.99270400   | 0.65498400  | 4.69284200  |
| F | 0.20924800   | -1.07937800 | 5.41362200  |
| C | 1.73829500   | -1.46988200 | -0.84883800 |
| C | 2.23659000   | -2.74218600 | -0.55531200 |
| C | 1.05914300   | -1.26852800 | -2.04568100 |
| C | 2.04338700   | -3.80026100 | -1.42764700 |
| H | 2.78285100   | -2.90874200 | 0.36247300  |
| C | 0.85130000   | -2.32122600 | -2.93074400 |
| H | 0.68028200   | -0.29258400 | -2.30635100 |
| C | 1.34551000   | -3.56629900 | -2.60054800 |
| H | 2.42386200   | -4.78803800 | -1.20916900 |
| H | 0.31997900   | -2.17504600 | -3.86046100 |
| F | 1.14679100   | -4.59625500 | -3.45422300 |

#### FP-INT-I-A

|    |             |             |             |
|----|-------------|-------------|-------------|
| CI | 0.67008000  | 2.16523300  | 0.86528600  |
| O  | -5.25230700 | -0.39619600 | 0.14496000  |
| N  | -8.52681800 | -1.41148000 | 0.65009800  |
| N  | -7.21824400 | -3.36775700 | -3.02993500 |
| N  | -3.76961100 | -2.64408800 | -3.78147400 |
| C  | -7.68388400 | -1.58779700 | -0.11985500 |
| C  | -6.94380600 | -2.66592300 | -2.15448200 |
| C  | -4.01495400 | -2.02969100 | -2.83574100 |
| C  | -6.65636600 | -1.81092200 | -1.06722700 |

|   |             |             |             |
|---|-------------|-------------|-------------|
| C | -5.42878000 | -1.19348300 | -0.90516300 |
| C | -4.23513800 | -1.25109400 | -1.68253800 |
| C | -3.27314000 | -0.42743700 | -1.10915900 |
| C | -3.90733900 | 0.23262700  | 0.10914500  |
| C | -1.96295700 | -0.26539900 | -1.56917100 |
| H | -1.70297500 | -0.82060100 | -2.46047400 |
| C | -1.02225600 | 0.53225700  | -0.96071600 |
| H | -1.31219400 | 1.05612800  | -0.06496000 |
| C | 0.29740700  | 0.73688600  | -1.40335200 |
| C | 0.77276900  | 0.08613300  | -2.68463000 |
| H | 0.33259700  | 0.61671600  | -3.53570700 |
| H | 0.38350000  | -0.93263100 | -2.72564200 |
| C | 2.28921900  | 0.05449200  | -2.81172900 |
| H | 2.70150500  | -0.66720100 | -2.10499400 |
| C | 2.88159400  | 1.42771000  | -2.52945100 |
| H | 2.55227100  | 2.14027500  | -3.29361100 |
| H | 3.96847600  | 1.39934100  | -2.57633400 |
| C | 2.45864100  | 1.92199700  | -1.16760800 |
| C | 1.17305500  | 1.54262200  | -0.69472200 |
| C | 3.27278900  | 2.73095500  | -0.43697300 |
| H | 3.00644800  | 3.07228200  | 0.55417400  |
| H | 2.56869300  | -0.27859500 | -3.81213800 |
| O | 1.99886100  | -0.65287800 | 2.88589800  |
| N | 4.09610800  | -2.59363300 | -0.97070800 |
| C | 6.33292300  | -0.72814900 | -0.79935500 |
| C | 5.95311700  | -1.46075500 | -2.08889700 |
| C | 5.27513600  | -2.77737400 | -1.79617500 |
| H | 5.97947900  | -3.47569500 | -1.32118900 |
| C | 3.29464000  | -3.79025000 | -0.82336000 |
| H | 3.27683200  | -4.30031700 | -1.78753600 |
| H | 3.75287400  | -4.48534700 | -0.10392600 |
| C | 1.89733200  | -3.41578200 | -0.40399800 |
| H | 1.27507800  | -4.30904900 | -0.31916800 |
| H | 1.46050300  | -2.79028300 | -1.18688200 |
| C | 1.86416300  | -2.65586200 | 0.92919800  |
| C | 2.98253000  | -1.59854800 | 0.95653900  |
| C | 3.00009800  | -0.60984200 | 1.95733700  |
| C | 4.00120600  | 0.35228800  | 2.01807700  |
| C | 5.03265000  | 0.30231100  | 1.09432600  |
| H | 5.82225300  | 1.03613300  | 1.17151400  |
| C | 5.10554300  | -0.66415900 | 0.10933200  |
| C | 4.06450700  | -1.63038500 | 0.03258000  |
| C | 7.46222500  | -1.48107600 | -0.06877900 |
| H | 7.75531000  | -0.93727800 | 0.83068200  |
| H | 8.33995700  | -1.57638300 | -0.71384200 |
| H | 7.15164000  | -2.47962500 | 0.23792800  |
| C | 6.85309200  | 0.66285900  | -1.18378100 |
| H | 7.25394800  | 1.20497300  | -0.32727400 |
| H | 6.06663800  | 1.26928800  | -1.63053200 |
| H | 7.66337300  | 0.56076700  | -1.90901300 |
| C | 2.07051600  | -3.64911500 | 2.08920600  |
| H | 2.05706800  | -3.13014300 | 3.04623500  |
| H | 3.02295800  | -4.17329600 | 2.00054700  |
| H | 1.26968200  | -4.39356000 | 2.08999700  |
| C | 0.44915000  | -2.06018500 | 1.02500800  |
| H | 0.32446000  | -1.25288400 | 0.30753200  |
| H | -0.28082200 | -2.83616300 | 0.78347700  |
| H | 0.22185100  | -1.67529300 | 2.01028300  |
| C | 1.98674500  | 0.30327100  | 3.93238500  |
| H | 1.87566900  | 1.31854800  | 3.54454600  |
| H | 2.89456800  | 0.24460600  | 4.53822800  |
| H | 4.95271000  | -3.24825400 | -2.72724000 |
| H | 5.27737500  | -0.83232500 | -2.67470400 |
| H | 6.84394500  | -1.63529700 | -2.69597600 |
| H | 3.99729800  | 1.11791800  | 2.77699100  |
| O | 4.42682500  | 3.15480400  | -0.92427600 |
| C | 5.24807600  | 3.96383800  | -0.04415400 |
| H | 4.62472200  | 4.75712500  | 0.37200700  |
| H | 5.59717400  | 3.32635000  | 0.76936200  |
| C | 6.39408200  | 4.51972200  | -0.85030400 |
| H | 6.99989100  | 3.71718700  | -1.27016100 |

|   |             |             |             |
|---|-------------|-------------|-------------|
| H | 6.02844700  | 5.14807500  | -1.66289200 |
| H | 7.02801700  | 5.12709500  | -0.20324000 |
| C | -3.20713900 | -0.16298400 | 1.40347900  |
| C | -2.50131000 | 0.76065700  | 2.16774000  |
| C | -3.23994200 | -1.49707900 | 1.81105200  |
| C | -1.83852500 | 0.36974100  | 3.32446000  |
| H | -2.45753400 | 1.79724200  | 1.86982200  |
| C | -2.59413500 | -1.90253800 | 2.96794500  |
| H | -3.77564600 | -2.23277500 | 1.22773000  |
| C | -1.90283900 | -0.95560900 | 3.70225500  |
| H | -1.28413500 | 1.08145700  | 3.91885000  |
| H | -2.61301000 | -2.93331500 | 3.29196400  |
| C | -4.17420600 | 1.72176200  | -0.03752900 |
| C | -4.92150400 | 2.35282700  | 0.96088400  |
| C | -3.76320800 | 2.45904000  | -1.14264000 |
| C | -5.23609600 | 3.69842100  | 0.87124600  |
| H | -5.26270200 | 1.78753000  | 1.81669400  |
| C | -4.06560700 | 3.81298900  | -1.24630100 |
| H | -3.20056400 | 1.99326300  | -1.93642500 |
| C | -4.79328300 | 4.40460800  | -0.23453800 |
| H | -5.81236900 | 4.19536700  | 1.63882800  |
| H | -3.74576400 | 4.39483000  | -2.09909200 |
| F | -1.25777100 | -1.34653200 | 4.82589900  |
| F | -5.09057000 | 5.72104800  | -0.32597200 |
| H | 1.12640900  | 0.05563000  | 4.54865000  |

#### FP-TS-I-A

|    |             |             |             |
|----|-------------|-------------|-------------|
| Cl | 0.88140600  | 1.88301300  | 0.76297300  |
| O  | -5.26154500 | -0.37053100 | 0.14927500  |
| N  | -8.58238000 | -1.12066700 | 0.71365100  |
| N  | -7.65361900 | -2.76373000 | -3.22257300 |
| N  | -4.14527900 | -2.19283700 | -4.10425300 |
| C  | -7.79701700 | -1.28440900 | -0.12136700 |
| C  | -7.27334600 | -2.18810600 | -2.29293500 |
| C  | -4.31128200 | -1.69887200 | -3.07059800 |
| C  | -6.85019600 | -1.49118900 | -1.14532200 |
| C  | -5.54347400 | -1.01056900 | -0.99482400 |
| C  | -4.41490200 | -1.07454200 | -1.82028400 |
| C  | -3.31894700 | -0.42564800 | -1.17511200 |
| C  | -3.87211700 | 0.14841400  | 0.12473500  |
| C  | -2.03765600 | -0.34962300 | -1.63698300 |
| H  | -1.85628100 | -0.80701000 | -2.60092900 |
| C  | -0.96278300 | 0.30372100  | -0.98480800 |
| H  | -1.16017600 | 0.72072400  | -0.00941100 |
| C  | 0.29171500  | 0.47743900  | -1.50132500 |
| C  | 0.64908000  | -0.03096600 | -2.88088900 |
| H  | 0.32404600  | 0.70344200  | -3.62687700 |
| H  | 0.09949100  | -0.94788000 | -3.08902500 |
| C  | 2.13967800  | -0.28743300 | -3.03048100 |
| H  | 2.41935100  | -1.10347300 | -2.36405300 |
| C  | 2.94132900  | 0.94952000  | -2.66452200 |
| H  | 2.77860800  | 1.73839000  | -3.40743700 |
| H  | 4.00937600  | 0.74062700  | -2.67942900 |
| C  | 2.55906100  | 1.47289900  | -1.30289700 |
| C  | 1.31395000  | 1.20984000  | -0.80625500 |
| C  | 3.52612400  | 2.28300500  | -0.60117400 |
| H  | 3.15591000  | 2.89175400  | 0.21472000  |
| H  | 2.37024000  | -0.60261500 | -4.04899000 |
| O  | 3.55971000  | 1.15341000  | 2.68782100  |
| N  | 3.06091000  | -2.67231700 | -0.09801600 |
| C  | 5.56541500  | -2.12078800 | -1.42839600 |
| C  | 4.51479100  | -3.01164500 | -2.09515900 |
| C  | 3.57237400  | -3.62629400 | -1.08597500 |
| H  | 4.05916800  | -4.44267000 | -0.54342700 |
| C  | 1.85889400  | -3.16333700 | 0.57419500  |
| H  | 1.13752900  | -3.42788800 | -0.20105800 |
| H  | 2.11976600  | -4.09041200 | 1.09361900  |
| C  | 1.26794600  | -2.15895400 | 1.53062500  |
| H  | 0.54943600  | -2.67281400 | 2.16987800  |
| H  | 0.72054900  | -1.39012100 | 0.98197500  |

|   |             |             |             |
|---|-------------|-------------|-------------|
| C | 2.35162100  | -1.48268000 | 2.38468300  |
| C | 3.28353200  | -0.77989100 | 1.39230000  |
| C | 3.84107900  | 0.47172200  | 1.56214700  |
| C | 4.67945900  | 1.05853400  | 0.55436600  |
| C | 5.27924200  | 0.15211200  | -0.37908700 |
| H | 6.09576700  | 0.52884600  | -0.97634300 |
| C | 4.84596600  | -1.11698700 | -0.54036700 |
| C | 3.69410300  | -1.53748100 | 0.24063600  |
| C | 6.49262700  | -2.96642100 | -0.53116100 |
| H | 7.26598300  | -2.33520000 | -0.09208500 |
| H | 6.97615700  | -3.74937700 | -1.11926500 |
| H | 5.94998700  | -3.44043700 | 0.28724100  |
| C | 6.40631800  | -1.45707400 | -2.52086600 |
| H | 7.22482600  | -0.86798500 | -2.10711100 |
| H | 5.79908100  | -0.80881500 | -3.15414100 |
| H | 6.84771400  | -2.22896500 | -3.15333000 |
| C | 3.17390100  | -2.53112900 | 3.16217900  |
| H | 3.89653200  | -2.02928600 | 3.80683500  |
| H | 3.72727600  | -3.20170900 | 2.50489300  |
| H | 2.51573200  | -3.13489700 | 3.79131200  |
| C | 1.62976900  | -0.60204000 | 3.41099200  |
| H | 1.07906700  | 0.20478400  | 2.93488500  |
| H | 0.91791800  | -1.23140900 | 3.94586600  |
| H | 2.31267500  | -0.17234300 | 4.13690400  |
| C | 4.22429700  | 2.37810300  | 2.99126300  |
| H | 3.98118400  | 3.15879300  | 2.27071200  |
| H | 5.30549800  | 2.23992900  | 3.04000900  |
| H | 2.70895200  | -4.05676300 | -1.59288900 |
| H | 3.95241600  | -2.42311200 | -2.81946600 |
| H | 5.00279500  | -3.81656600 | -2.64726000 |
| H | 5.32646700  | 1.85769400  | 0.88584600  |
| O | 4.42016400  | 2.89537400  | -1.40835800 |
| C | 5.16949200  | 3.98635800  | -0.84341500 |
| H | 4.47763700  | 4.65753200  | -0.32820300 |
| H | 5.87878200  | 3.59123100  | -0.11170500 |
| C | 5.89242200  | 4.68941400  | -1.96643500 |
| H | 6.57037700  | 4.00485100  | -2.47713600 |
| H | 5.18456000  | 5.09041000  | -2.69225000 |
| H | 6.47845500  | 5.51529500  | -1.56159900 |
| C | -3.18346800 | -0.43454800 | 1.35135000  |
| C | -2.51029300 | 0.35241200  | 2.27923500  |
| C | -3.22129800 | -1.81775300 | 1.53683600  |
| C | -1.90113800 | -0.22037600 | 3.39050700  |
| H | -2.45165400 | 1.42232900  | 2.14733400  |
| C | -2.62085400 | -2.40628400 | 2.63803300  |
| H | -3.73037800 | -2.44575400 | 0.81861800  |
| C | -1.97684700 | -1.58806500 | 3.54949200  |
| H | -1.37748800 | 0.38410600  | 4.11657700  |
| H | -2.65027700 | -3.47555500 | 2.79365400  |
| C | -4.01539000 | 1.66335800  | 0.14361900  |
| C | -4.78306700 | 2.23861300  | 1.16033600  |
| C | -3.44893200 | 2.48923900  | -0.82037500 |
| C | -4.96832800 | 3.61003300  | 1.22694500  |
| H | -5.24414300 | 1.60799900  | 1.90737900  |
| C | -3.61962700 | 3.86950100  | -0.76698900 |
| H | -2.86849700 | 2.06689900  | -1.62542500 |
| C | -4.37373200 | 4.40070200  | 0.25845000  |
| H | -5.56071000 | 4.06230500  | 2.00991500  |
| H | -3.18000400 | 4.51792600  | -1.51180300 |
| F | -1.39215800 | -2.15608100 | 4.63225500  |
| F | -4.54531400 | 5.74324700  | 0.31907000  |
| H | 3.85263500  | 2.67127200  | 3.96891500  |

#### FP-INT-I-B

|    |             |             |             |
|----|-------------|-------------|-------------|
| Cl | 0.86441500  | 1.80387700  | 0.77558700  |
| O  | -5.25619100 | -0.43358200 | 0.19503700  |
| N  | -8.54646600 | -1.22405200 | 0.85053500  |
| N  | -7.79745700 | -2.60158400 | -3.22255900 |
| N  | -4.29693200 | -2.00868300 | -4.19330800 |

|   |             |             |             |
|---|-------------|-------------|-------------|
| C | -7.79768000 | -1.33523800 | -0.02666300 |
| C | -7.37341200 | -2.09382800 | -2.27172000 |
| C | -4.42986400 | -1.57068300 | -3.12917200 |
| C | -6.89730800 | -1.47754000 | -1.10048600 |
| C | -5.58018300 | -1.00501900 | -0.97757000 |
| C | -4.48948100 | -1.01638400 | -1.84529100 |
| C | -3.36165300 | -0.40108700 | -1.20064400 |
| C | -3.87752700 | 0.10779700  | 0.14226400  |
| C | -2.10060300 | -0.30342200 | -1.69263000 |
| H | -1.94592400 | -0.70946900 | -2.68428600 |
| C | -0.99637100 | 0.31354500  | -1.03100700 |
| H | -1.16902400 | 0.66622000  | -0.02622700 |
| C | 0.23764800  | 0.51961600  | -1.56032800 |
| C | 0.58165500  | 0.10745800  | -2.97361300 |
| H | 0.31743400  | 0.92290500  | -3.65717600 |
| H | -0.01878000 | -0.75144200 | -3.26839400 |
| C | 2.05948000  | -0.21880900 | -3.12978000 |
| H | 2.29163700  | -1.09499300 | -2.52128500 |
| C | 2.91489000  | 0.95251200  | -2.67667200 |
| H | 2.79242600  | 1.79324900  | -3.36798000 |
| H | 3.97230600  | 0.69877200  | -2.70984800 |
| C | 2.54590100  | 1.41264200  | -1.28831300 |
| C | 1.29604000  | 1.19565100  | -0.82837700 |
| C | 3.59755900  | 2.14354400  | -0.50637600 |
| H | 3.12219500  | 2.81323700  | 0.20940100  |
| H | 2.28460600  | -0.47448700 | -4.16620300 |
| O | 3.62911500  | 1.23426900  | 2.58687400  |
| N | 3.07927600  | -2.62333000 | -0.09368500 |
| C | 5.58410400  | -2.14226000 | -1.42622400 |
| C | 4.50546200  | -2.97860600 | -2.12136500 |
| C | 3.52311400  | -3.56554000 | -1.13383800 |
| H | 3.95148600  | -4.42854400 | -0.61797200 |
| C | 1.90003500  | -3.11769700 | 0.62725500  |
| H | 1.14442100  | -3.35490900 | -0.12200000 |
| H | 2.18705900  | -4.05910700 | 1.10217600  |
| C | 1.36460200  | -2.13497800 | 1.63839000  |
| H | 0.69969400  | -2.67231600 | 2.31414500  |
| H | 0.77013700  | -1.36650200 | 1.14162400  |
| C | 2.49001400  | -1.45561500 | 2.43524300  |
| C | 3.34702900  | -0.73998800 | 1.38780700  |
| C | 3.84274900  | 0.53087800  | 1.47492700  |
| C | 4.56129500  | 1.17106200  | 0.34010600  |
| C | 5.22492800  | 0.18914200  | -0.54415400 |
| H | 6.01153600  | 0.57115800  | -1.17623700 |
| C | 4.86693600  | -1.09508800 | -0.59514700 |
| C | 3.71492800  | -1.50636600 | 0.22021400  |
| C | 6.42771200  | -3.01808600 | -0.47857000 |
| H | 7.21496800  | -2.42026800 | -0.01866500 |
| H | 6.89248200  | -3.83303800 | -1.03636100 |
| H | 5.83237600  | -3.45374200 | 0.32422300  |
| C | 6.49975600  | -1.53026400 | -2.48575100 |
| H | 7.31065600  | -0.95571800 | -2.03725100 |
| H | 5.94789300  | -0.87875800 | -3.16480600 |
| H | 6.95056200  | -2.32929100 | -3.07574800 |
| C | 3.36179800  | -2.49906800 | 3.16117900  |
| H | 4.12503900  | -1.99539400 | 3.75520900  |
| H | 3.87077300  | -3.17562300 | 2.47482600  |
| H | 2.74513500  | -3.09898500 | 3.83368800  |
| C | 1.82368800  | -0.57484100 | 3.49816100  |
| H | 1.24417500  | 0.22878800  | 3.05132600  |
| H | 1.14583200  | -1.20461600 | 4.07540100  |
| H | 2.54682500  | -0.14047900 | 4.18187900  |
| C | 4.26414000  | 2.49348600  | 2.83443500  |
| H | 3.94436900  | 3.25267100  | 2.12355500  |
| H | 5.34914600  | 2.39133000  | 2.81963000  |
| H | 2.62771700  | -3.91437600 | -1.64656400 |
| H | 3.98095200  | -2.35476300 | -2.84521300 |
| H | 4.96357800  | -3.79848100 | -2.67632000 |
| H | 5.32709000  | 1.84027300  | 0.73267700  |
| O | 4.39280700  | 2.88523500  | -1.40331800 |
| C | 4.99138100  | 4.05715200  | -0.84973200 |



|   |             |             |             |
|---|-------------|-------------|-------------|
| H | 4.20638200  | 4.70203600  | -0.43923200 |
| H | 5.66756700  | 3.78754800  | -0.03052100 |
| C | 5.75528700  | 4.76294200  | -1.94637400 |
| H | 6.53968700  | 4.11878400  | -2.34595100 |
| H | 5.08748300  | 5.04597400  | -2.76091000 |
| H | 6.22047000  | 5.66692700  | -1.55091600 |
| C | -3.13839300 | -0.50860600 | 1.32218700  |
| C | -2.45274400 | 0.25443700  | 2.26076700  |
| C | -3.13926500 | -1.89876300 | 1.45076200  |
| C | -1.79065500 | -0.34921200 | 3.32480800  |
| H | -2.42303700 | 1.33000500  | 2.17224100  |
| C | -2.48777400 | -2.51824300 | 2.50515800  |
| H | -3.65870500 | -2.50723600 | 0.72313700  |
| C | -1.82928900 | -1.72363100 | 3.42726300  |
| H | -1.25566100 | 0.23700000  | 4.05753400  |
| H | -2.48753300 | -3.59350000 | 2.61626700  |
| C | -4.03877000 | 1.61938100  | 0.22767600  |
| C | -4.80443700 | 2.14287300  | 1.27325100  |
| C | -3.48049600 | 2.49213100  | -0.69888700 |
| C | -4.99830000 | 3.50879200  | 1.40324200  |
| H | -5.25732600 | 1.47546300  | 1.99283900  |
| C | -3.65964100 | 3.86751500  | -0.58200900 |
| H | -2.90010100 | 2.10882500  | -1.52335900 |
| C | -4.41317400 | 4.34651200  | 0.46926700  |
| H | -5.58999700 | 3.92115000  | 2.20850700  |
| H | -3.22691600 | 4.55228600  | -1.29783700 |
| F | -1.19036000 | -2.32307000 | 4.46237400  |
| F | -4.59346900 | 5.68431500  | 0.59137800  |
| H | 3.94086400  | 2.77927100  | 3.83059600  |

#### FP-TS-I-B

|    |             |             |             |
|----|-------------|-------------|-------------|
| Cl | -0.28076300 | -1.82901700 | 1.31128000  |
| O  | 5.64876400  | 0.31347100  | 0.27747000  |
| N  | 8.71244600  | 1.78131300  | 0.84877000  |
| N  | 9.03177500  | -0.11359000 | -3.07129200 |
| N  | 5.88902000  | -1.79771300 | -3.98331800 |
| C  | 8.20364400  | 1.16015700  | 0.01302000  |
| C  | 8.37072100  | 0.11133300  | -2.14684100 |
| C  | 5.71925500  | -1.30847600 | -2.94680700 |
| C  | 7.59757000  | 0.40609600  | -1.01004700 |
| C  | 6.26469400  | -0.02015400 | -0.87176300 |
| C  | 5.41882100  | -0.75585100 | -1.69686500 |
| C  | 4.14628800  | -0.92552100 | -1.04359000 |
| C  | 4.22307700  | -0.07990400 | 0.22858400  |
| C  | 3.09871200  | -1.67400800 | -1.46912200 |
| H  | 3.21570400  | -2.18334300 | -2.41819100 |
| C  | 1.86068200  | -1.79136600 | -0.76381200 |
| H  | 1.84591300  | -1.36728500 | 0.22727500  |
| C  | 0.69618200  | -2.32686300 | -1.20182500 |
| C  | 0.50472600  | -2.92051200 | -2.57398500 |
| H  | 0.51831900  | -4.01425900 | -2.50102900 |
| H  | 1.32799600  | -2.63694700 | -3.22731900 |
| C  | -0.82687300 | -2.47877100 | -3.17908200 |
| H  | -0.81741500 | -1.39357900 | -3.30762600 |
| C  | -1.98738900 | -2.86969800 | -2.27261300 |
| H  | -2.13198500 | -3.95537200 | -2.31386800 |
| H  | -2.92349600 | -2.44490800 | -2.63354700 |
| C  | -1.76227200 | -2.46534200 | -0.83574800 |
| C  | -0.50936200 | -2.27254200 | -0.38647400 |
| C  | -2.97877500 | -2.18200500 | 0.02700300  |
| H  | -2.75345300 | -2.47729200 | 1.05149700  |
| H  | -0.95928600 | -2.92116900 | -4.16773700 |
| O  | -3.06890500 | -0.54049700 | 2.42587700  |
| N  | -2.03281000 | 3.33394700  | -0.12904200 |
| C  | -2.88432200 | 2.10456200  | -2.59682100 |
| C  | -1.85558100 | 3.23518800  | -2.59078400 |
| C  | -1.99393300 | 4.10825200  | -1.36828900 |
| H  | -2.89429400 | 4.72777200  | -1.42868900 |
| C  | -1.84593500 | 4.12748600  | 1.08084800  |

|   |             |             |             |
|---|-------------|-------------|-------------|
| H | -1.23637600 | 4.98888900  | 0.81697800  |
| H | -2.81559500 | 4.50477700  | 1.42124700  |
| C | -1.16462800 | 3.30142700  | 2.13837700  |
| H | -1.01734500 | 3.89993900  | 3.03839300  |
| H | -0.17605500 | 3.01760400  | 1.77168500  |
| C | -1.95567300 | 2.03648400  | 2.49566500  |
| C | -2.42117800 | 1.35231400  | 1.19952300  |
| C | -2.92668600 | 0.06609400  | 1.22155700  |
| C | -3.29482100 | -0.66848000 | 0.03300100  |
| C | -3.10634200 | 0.04236300  | -1.19945700 |
| H | -3.36773100 | -0.48308300 | -2.10471400 |
| C | -2.76581100 | 1.34780000  | -1.27937000 |
| C | -2.38186300 | 2.03681900  | -0.06552700 |
| C | -4.31520100 | 2.66903200  | -2.69919700 |
| H | -5.03497600 | 1.85134300  | -2.75488500 |
| H | -4.41919300 | 3.28480500  | -3.59534700 |
| H | -4.57820400 | 3.27723600  | -1.83331600 |
| C | -2.61037400 | 1.21646300  | -3.81469800 |
| H | -3.35772300 | 0.43261900  | -3.93565400 |
| H | -1.62740200 | 0.74884000  | -3.74645000 |
| H | -2.63402000 | 1.82764100  | -4.71840200 |
| C | -3.16958200 | 2.41169600  | 3.36335700  |
| H | -3.72866700 | 1.52518600  | 3.65496300  |
| H | -3.85014200 | 3.07934200  | 2.83341200  |
| H | -2.83461300 | 2.91741500  | 4.27185000  |
| C | -0.98138900 | 1.16257000  | 3.30986900  |
| H | -0.16335600 | 0.81388000  | 2.67902900  |
| H | -0.55412000 | 1.76888600  | 4.11150000  |
| H | -1.46474700 | 0.29825300  | 3.75143100  |
| C | -4.30984700 | -1.18634800 | 2.73892800  |
| H | -4.63434900 | -1.87400100 | 1.96071900  |
| H | -5.08411600 | -0.43490600 | 2.90464300  |
| H | -1.14659300 | 4.79014600  | -1.29239800 |
| H | -0.85486800 | 2.79915600  | -2.62568500 |
| H | -1.96730100 | 3.85463400  | -3.48178500 |
| H | -4.63424100 | -0.58572400 | 0.03306100  |
| O | -4.13072200 | -2.89117800 | -0.41372700 |
| C | -4.10549100 | -4.27663300 | -0.06981500 |
| H | -3.21216300 | -4.75118500 | -0.48839700 |
| H | -4.04791100 | -4.37291000 | 1.02124600  |
| C | -5.35868800 | -4.92960900 | -0.60582000 |
| H | -6.25007200 | -4.47994600 | -0.16589300 |
| H | -5.41407700 | -4.82524700 | -1.69050900 |
| H | -5.35745900 | -5.99315500 | -0.36318200 |
| C | -6.46375400 | 0.82014000  | 0.40528100  |
| C | -7.77908500 | 1.20692600  | 0.21451300  |
| C | -8.62731200 | 0.35439600  | -0.48278800 |
| C | -8.13424700 | -0.85097200 | -0.96746800 |
| C | -6.80514100 | -1.16733700 | -0.73766600 |
| N | -6.00502200 | -0.34306800 | -0.06045300 |
| H | -9.66050300 | 0.62805700  | -0.64804500 |
| H | -5.75375700 | 1.44155700  | 0.93564600  |
| H | -8.12662300 | 2.15335800  | 0.60253700  |
| H | -8.76525600 | -1.53629800 | -1.51471100 |
| H | -6.35054300 | -2.08383000 | -1.08576900 |
| C | 3.44080900  | 1.22746200  | 0.15907300  |
| C | 3.77073600  | 2.24514100  | 1.05849400  |
| C | 2.41241600  | 1.44410300  | -0.75078200 |
| C | 3.08440600  | 3.44985700  | 1.06127700  |
| H | 4.57416500  | 2.09544800  | 1.76557600  |
| C | 1.71044300  | 2.64533500  | -0.75990800 |
| H | 2.14727700  | 0.67907000  | -1.46307800 |
| C | 2.06027300  | 3.62258200  | 0.14728300  |
| H | 3.33445100  | 4.24056900  | 1.75463100  |
| H | 0.91156800  | 2.81960700  | -1.46438200 |
| C | 3.95851300  | -0.88153100 | 1.49583300  |
| C | 4.72021300  | -2.02848500 | 1.72645600  |
| C | 2.96941900  | -0.53532200 | 2.41003000  |
| C | 4.50634100  | -2.81325400 | 2.84830300  |
| H | 5.48803100  | -2.31556800 | 1.02082100  |
| C | 2.73386000  | -1.31397800 | 3.53827300  |

|   |             |             |            |
|---|-------------|-------------|------------|
| H | 2.35597700  | 0.33704800  | 2.24445100 |
| C | 3.51020400  | -2.43686700 | 3.73377100 |
| H | 5.09235900  | -3.70197900 | 3.03649500 |
| H | 1.95782800  | -1.05630900 | 4.24519100 |
| F | 1.37849800  | 4.79566100  | 0.14290800 |
| F | 3.28953700  | -3.20452800 | 4.82907200 |
| H | -4.13259400 | -1.73575700 | 3.65901900 |

**FP-INT-I-C**

|    |             |             |             |
|----|-------------|-------------|-------------|
| Cl | -0.08508300 | -1.08082800 | -1.99559200 |
| O  | -5.70807600 | 0.88452200  | 0.46980400  |
| N  | -8.47020900 | 2.83656900  | 1.12644100  |
| N  | -9.08440500 | -0.85590000 | 3.37035200  |
| N  | -6.25476200 | -3.16314600 | 2.91649500  |
| C  | -8.07426600 | 1.78741500  | 1.41921100  |
| C  | -8.40348600 | -0.25174200 | 2.65369200  |
| C  | -6.03001500 | -2.22706700 | 2.27163600  |
| C  | -7.60461700 | 0.51111300  | 1.78389000  |
| C  | -6.37649300 | 0.04510300  | 1.28139500  |
| C  | -5.67180200 | -1.14139700 | 1.46471100  |
| C  | -4.44238900 | -1.08534900 | 0.71688900  |
| C  | -4.49106500 | 0.22960200  | -0.06152600 |
| C  | -3.42404900 | -1.97942100 | 0.74060700  |
| H  | -3.53981200 | -2.83423900 | 1.39571500  |
| C  | -2.21607600 | -1.83751800 | -0.01165200 |
| H  | -2.20544400 | -1.04809600 | -0.74492200 |
| C  | -1.06930100 | -2.54578500 | 0.11659700  |
| C  | -0.87547000 | -3.66043900 | 1.11270200  |
| H  | -0.90009600 | -4.62378100 | 0.59011900  |
| H  | -1.68907400 | -3.67016900 | 1.83511500  |
| C  | 0.46594700  | -3.51676000 | 1.82958300  |
| H  | 0.47097500  | -2.57564000 | 2.38605800  |
| C  | 1.61486700  | -3.52377700 | 0.82846000  |
| H  | 1.76667500  | -4.54319000 | 0.45594600  |
| H  | 2.55325100  | -3.25420200 | 1.31461100  |
| C  | 1.37285300  | -2.60120600 | -0.34137400 |
| C  | 0.12472100  | -2.20118000 | -0.64063800 |
| C  | 2.57266900  | -2.03569300 | -1.07510500 |
| H  | 2.36470600  | -2.00944000 | -2.14453900 |
| H  | 0.59839300  | -4.32172200 | 2.55420600  |
| O  | 3.30924300  | 0.09495200  | -2.85059700 |
| N  | 3.61844200  | 3.25913800  | 0.79089700  |
| C  | 2.86222800  | 1.19839200  | 2.73401100  |
| C  | 2.90288800  | 2.70127500  | 3.03985800  |
| C  | 3.93979200  | 3.41086300  | 2.19788200  |
| H  | 4.94926400  | 3.02916500  | 2.41213000  |
| C  | 4.19651900  | 4.23479200  | -0.10809300 |
| H  | 4.13199600  | 5.21229600  | 0.37014500  |
| H  | 5.26313200  | 4.03089900  | -0.28613500 |
| C  | 3.41599900  | 4.21925000  | -1.39901900 |
| H  | 3.76910400  | 5.00282600  | -2.07119000 |
| H  | 2.37149400  | 4.43690600  | -1.16294800 |
| C  | 3.51237100  | 2.86244400  | -2.11693500 |
| C  | 3.36723800  | 1.72378300  | -1.09023500 |
| C  | 3.20484800  | 0.39403000  | -1.50636900 |
| C  | 2.87834700  | -0.63085100 | -0.61093000 |
| C  | 2.76171100  | -0.30043300 | 0.73188100  |
| H  | 2.47843000  | -1.07471500 | 1.42803600  |
| C  | 2.99762900  | 0.96621600  | 1.22606400  |
| C  | 3.33372100  | 1.99666000  | 0.31019500  |
| C  | 4.00983300  | 0.48815300  | 3.47399800  |
| H  | 4.02547700  | -0.57726600 | 3.23991300  |
| H  | 3.88507600  | 0.59631200  | 4.55391600  |
| H  | 4.97942500  | 0.90349700  | 3.20036100  |
| C  | 1.52318900  | 0.64377400  | 3.24915500  |
| H  | 1.47712400  | -0.44313200 | 3.18493000  |
| H  | 0.68753300  | 1.05290800  | 2.68109000  |
| H  | 1.39142400  | 0.91596500  | 4.29864200  |
| C  | 4.85915000  | 2.79743900  | -2.85872600 |

|   |             |             |             |
|---|-------------|-------------|-------------|
| H | 4.92468900  | 1.91657700  | -3.48989300 |
| H | 5.69895100  | 2.78256100  | -2.16285400 |
| H | 4.96622000  | 3.67480300  | -3.50088500 |
| C | 2.36247700  | 2.83353100  | -3.14207700 |
| H | 1.39777300  | 2.83723900  | -2.63178300 |
| H | 2.41445600  | 3.72863800  | -3.76659600 |
| H | 2.40947500  | 1.95928500  | -3.78371900 |
| C | 4.48585200  | -0.61652100 | -3.24226200 |
| H | 4.53810700  | -1.59975900 | -2.77756500 |
| H | 5.38570000  | -0.05631100 | -2.97864600 |
| H | 3.94700300  | 4.47737000  | 2.42229000  |
| H | 1.92851400  | 3.14410600  | 2.82621900  |
| H | 3.10887500  | 2.85345100  | 4.10120600  |
| H | 5.02690100  | -2.10984300 | 0.01935800  |
| O | 3.74765900  | -2.85103300 | -0.87319500 |
| C | 3.78393700  | -4.04494800 | -1.66653700 |
| H | 2.88666700  | -4.63697400 | -1.47135000 |
| H | 3.77425900  | -3.76463700 | -2.72506800 |
| C | 5.03203300  | -4.82173500 | -1.31991400 |
| H | 5.92843200  | -4.23376300 | -1.52421100 |
| H | 5.03072200  | -5.11128800 | -0.26793800 |
| H | 5.07929700  | -5.73024300 | -1.92118100 |
| C | 6.05068100  | -0.37098300 | 0.40736400  |
| C | 7.02408400  | 0.23648500  | 1.17016600  |
| C | 7.68930600  | -0.51091700 | 2.13465900  |
| C | 7.36604000  | -1.85163100 | 2.31596800  |
| C | 6.39019400  | -2.41471200 | 1.52257700  |
| N | 5.76982700  | -1.66804500 | 0.59774100  |
| H | 8.45126600  | -0.05030300 | 2.74767800  |
| H | 5.47379800  | 0.14277300  | -0.34505000 |
| H | 7.24348600  | 1.28176700  | 1.01551300  |
| H | 7.86110700  | -2.45468000 | 3.06143400  |
| H | 6.07927900  | -3.44489400 | 1.59847500  |
| C | -3.32164100 | 1.14455700  | 0.28428800  |
| C | -2.35993300 | 1.51297500  | -0.65063600 |
| C | -3.17904200 | 1.57690500  | 1.60362500  |
| C | -1.27189300 | 2.29955700  | -0.28767000 |
| H | -2.43850400 | 1.17791600  | -1.67374900 |
| C | -2.10800200 | 2.37154300  | 1.98313800  |
| H | -3.91082400 | 1.29127700  | 2.34675200  |
| C | -1.17394900 | 2.71906700  | 1.02224700  |
| H | -0.51423300 | 2.57737400  | -1.00628000 |
| H | -1.99282000 | 2.71558300  | 3.00142700  |
| C | -4.73866200 | 0.07539700  | -1.55519400 |
| C | -5.06518400 | 1.21532500  | -2.29466400 |
| C | -4.68475700 | -1.15346300 | -2.20201000 |
| C | -5.31931900 | 1.13618100  | -3.65460200 |
| H | -5.12351400 | 2.17602300  | -1.80229800 |
| C | -4.93145200 | -1.25262400 | -3.56827400 |
| H | -4.44886900 | -2.04715100 | -1.64467100 |
| C | -5.24135300 | -0.10366900 | -4.26571300 |
| H | -5.57298000 | 2.01283300  | -4.23407800 |
| H | -4.88830700 | -2.20439300 | -4.07902300 |
| F | -0.12613900 | 3.49923900  | 1.38394200  |
| F | -5.48329500 | -0.18933600 | -5.59682400 |
| H | 4.43302700  | -0.72545800 | -4.32304900 |

#### FP-TS-I-C

|    |            |             |             |
|----|------------|-------------|-------------|
| Cl | 0.32249300 | -1.97802300 | 1.72804400  |
| O  | 5.54442000 | 1.07520300  | -0.15398400 |
| N  | 8.00377900 | 3.48616200  | -0.28206500 |
| N  | 8.51412600 | 1.09114700  | -3.89687800 |
| N  | 6.04887900 | -1.62229700 | -4.04574500 |
| C  | 7.64419500 | 2.59507200  | -0.92935600 |
| C  | 7.91767600 | 1.26799900  | -2.91995500 |
| C  | 5.83560900 | -1.03122600 | -3.07273900 |
| C  | 7.21655600 | 1.51466500  | -1.72572100 |
| C  | 6.12640600 | 0.73025100  | -1.31554600 |
| C  | 5.50039300 | -0.38099400 | -1.87909300 |

|   |             |             |             |
|---|-------------|-------------|-------------|
| C | 4.40543700  | -0.78667400 | -1.04358800 |
| C | 4.40161800  | 0.18344400  | 0.14062700  |
| C | 3.53255000  | -1.80316200 | -1.26773400 |
| H | 3.65932600  | -2.36841300 | -2.18260700 |
| C | 2.39175900  | -2.03986100 | -0.44317800 |
| H | 2.41146800  | -1.56909100 | 0.52549300  |
| C | 1.22772100  | -2.64708600 | -0.78272200 |
| C | 0.96841700  | -3.28807500 | -2.12098700 |
| H | 0.86034100  | -4.37047700 | -1.99153700 |
| H | 1.81450800  | -3.13108900 | -2.78653400 |
| C | -0.31152800 | -2.73124000 | -2.74654200 |
| H | -0.18596100 | -1.65965800 | -2.92481100 |
| C | -1.49970400 | -2.96113900 | -1.82198800 |
| H | -1.75246600 | -4.02656100 | -1.80224000 |
| H | -2.39357700 | -2.46719500 | -2.19635300 |
| C | -1.21862900 | -2.52987000 | -0.40001700 |
| C | 0.05342500  | -2.48961400 | 0.05584500  |
| C | -2.28305800 | -2.00619200 | 0.47145900  |
| H | -2.24992800 | -2.35913100 | 1.49167800  |
| H | -0.49708900 | -3.20237500 | -3.71284700 |
| O | -3.13790700 | -0.54157400 | 2.69250000  |
| N | -3.58506800 | 3.41865400  | 0.02448200  |
| C | -3.03880900 | 1.98126300  | -2.41824600 |
| C | -2.70572500 | 3.46886300  | -2.27085500 |
| C | -3.59012800 | 4.13616400  | -1.24410700 |
| H | -4.61805000 | 4.22657400  | -1.61177700 |
| C | -4.06903200 | 4.15863400  | 1.17873500  |
| H | -3.99782400 | 5.21987400  | 0.94837900  |
| H | -5.12714900 | 3.93378500  | 1.35376900  |
| C | -3.22129000 | 3.80892000  | 2.37623400  |
| H | -3.52480500 | 4.39812300  | 3.24255400  |
| H | -2.18635200 | 4.06922300  | 2.14655600  |
| C | -3.31647300 | 2.31547800  | 2.72532200  |
| C | -3.23801200 | 1.48114000  | 1.43297500  |
| C | -3.07563500 | 0.10226100  | 1.48040100  |
| C | -2.72220600 | -0.65712600 | 0.33364900  |
| C | -2.65869700 | 0.02290700  | -0.89605200 |
| H | -2.38946000 | -0.53617000 | -1.77501100 |
| C | -2.96482300 | 1.34415700  | -1.03528100 |
| C | -3.26625300 | 2.10839000  | 0.14063500  |
| C | -4.46518000 | 1.79608300  | -2.97049700 |
| H | -4.67954400 | 0.73573900  | -3.10803400 |
| H | -4.56746700 | 2.29798700  | -3.93549600 |
| H | -5.22035900 | 2.19455700  | -2.29464000 |
| C | -2.04795800 | 1.35845900  | -3.40874900 |
| H | -2.29102800 | 0.32138700  | -3.63941900 |
| H | -1.02515700 | 1.39338400  | -3.03120400 |
| H | -2.07973000 | 1.91396100  | -4.34744500 |
| C | -4.63081300 | 2.07085600  | 3.48672700  |
| H | -4.67760000 | 1.06150600  | 3.88379200  |
| H | -5.50182600 | 2.22720600  | 2.84913000  |
| H | -4.69865300 | 2.76171500  | 4.32996000  |
| C | -2.11954900 | 2.01275900  | 3.64780100  |
| H | -1.18091200 | 2.13968400  | 3.10595400  |
| H | -2.12419000 | 2.71714600  | 4.48280900  |
| H | -2.15610000 | 1.00424900  | 4.04756300  |
| C | -4.30320700 | -1.34032400 | 2.92475700  |
| H | -4.43798200 | -2.08799000 | 2.14617800  |
| H | -5.19703100 | -0.71666800 | 2.97691900  |
| H | -3.23570800 | 5.14891600  | -1.04747100 |
| H | -1.66035900 | 3.57581500  | -1.97093100 |
| H | -2.82412900 | 3.97819300  | -3.22848900 |
| H | -4.58223500 | -2.56041600 | -0.25500000 |
| O | -3.74227700 | -3.13166200 | -0.07660400 |
| C | -3.98413900 | -4.36817300 | 0.60880500  |
| H | -3.00258000 | -4.80395900 | 0.79680800  |
| H | -4.46056300 | -4.17593100 | 1.57348800  |
| C | -4.83180200 | -5.29131400 | -0.24313200 |
| H | -5.81902700 | -4.86329700 | -0.42301800 |
| H | -4.35020400 | -5.47900400 | -1.20324600 |
| H | -4.96567700 | -6.24491100 | 0.27077700  |

|   |             |             |             |
|---|-------------|-------------|-------------|
| C | -6.14619300 | -0.47585300 | -0.24643100 |
| C | -7.09474000 | 0.35230100  | -0.82393900 |
| C | -7.67919800 | -0.03822800 | -2.02131800 |
| C | -7.29211300 | -1.24181500 | -2.59593200 |
| C | -6.33910500 | -2.01133800 | -1.94614900 |
| N | -5.77893800 | -1.63833800 | -0.79198800 |
| H | -8.41834900 | 0.58787900  | -2.50259000 |
| H | -5.65495700 | -0.19599200 | 0.67427800  |
| H | -7.35838200 | 1.28528900  | -0.34662900 |
| H | -7.71610800 | -1.58126100 | -3.53020900 |
| H | -6.00611600 | -2.95528400 | -2.35976800 |
| C | 3.18723900  | 1.09576800  | 0.24947100  |
| C | 3.16356000  | 2.05365700  | 1.26680100  |
| C | 2.11098800  | 1.02898300  | -0.63014900 |
| C | 2.07873600  | 2.90223800  | 1.42848900  |
| H | 3.99880900  | 2.13418000  | 1.94853700  |
| C | 1.00703100  | 1.86031100  | -0.47434200 |
| H | 2.11394400  | 0.31503600  | -1.43779600 |
| C | 1.01175000  | 2.77700000  | 0.55603200  |
| H | 2.05299000  | 3.64137200  | 2.21683800  |
| H | 0.15486300  | 1.79036500  | -1.13366000 |
| C | 4.74639400  | -0.54915700 | 1.43529900  |
| C | 6.02419500  | -1.09326100 | 1.57834100  |
| C | 3.81608500  | -0.74624000 | 2.45112600  |
| C | 6.37224300  | -1.81247900 | 2.71142200  |
| H | 6.76198000  | -0.95624800 | 0.80051400  |
| C | 4.14352500  | -1.47153900 | 3.59164800  |
| H | 2.82094000  | -0.33699600 | 2.36728800  |
| C | 5.41822300  | -1.98850800 | 3.69827300  |
| H | 7.36160700  | -2.23130800 | 2.83121200  |
| H | 3.42301600  | -1.62891900 | 4.38190900  |
| F | -0.06251200 | 3.58674500  | 0.71648400  |
| F | 5.74998500  | -2.69256100 | 4.80797500  |
| H | -4.14852300 | -1.83428500 | 3.88038400  |

**Type-I product (TCF5-based)**

|    |             |             |             |
|----|-------------|-------------|-------------|
| CI | -0.01719400 | -1.18963600 | 0.54376900  |
| O  | 6.39246800  | -0.25964800 | -0.01809400 |
| N  | 9.83541800  | -0.66175700 | -0.00629300 |
| N  | 9.11246300  | 3.47422200  | -1.21612900 |
| N  | 5.60178900  | 4.20308700  | -1.47432100 |
| C  | 9.07058400  | 0.17420000  | -0.23273100 |
| C  | 8.65588800  | 2.46016100  | -0.90297100 |
| C  | 5.66209500  | 3.11503100  | -1.09309600 |
| C  | 8.14185700  | 1.20379300  | -0.51332100 |
| C  | 6.78399800  | 0.95517700  | -0.39730400 |
| C  | 5.65214200  | 1.78641500  | -0.62731900 |
| C  | 4.48965800  | 1.06883900  | -0.35140100 |
| C  | 4.91564100  | -0.31420100 | 0.12653800  |
| C  | 3.18524700  | 1.53076700  | -0.52668800 |
| H  | 3.08857500  | 2.53693300  | -0.91242000 |
| C  | 2.05339800  | 0.79135000  | -0.25115500 |
| H  | 2.18692100  | -0.20915400 | 0.12483900  |
| C  | 0.72904500  | 1.22179000  | -0.43581900 |
| C  | 0.47547500  | 2.62710400  | -0.94136900 |
| H  | 0.74334900  | 2.67176100  | -2.00243900 |
| H  | 1.15004000  | 3.31303300  | -0.42637500 |
| C  | -0.96558000 | 3.08159600  | -0.76234300 |
| H  | -1.16306700 | 3.29729000  | 0.29116900  |
| C  | -1.90471900 | 1.98430200  | -1.23942200 |
| H  | -1.67571600 | 1.75406200  | -2.28678200 |
| H  | -2.93741800 | 2.30797200  | -1.22173100 |
| C  | -1.70998000 | 0.71313000  | -0.44166300 |
| C  | -0.35009300 | 0.38278500  | -0.17392000 |
| C  | -2.73292100 | -0.13160900 | -0.08199400 |
| H  | -2.43775400 | -1.10988200 | 0.27067500  |
| H  | -1.13465800 | 4.00336400  | -1.32014000 |
| O  | -4.41112200 | -2.30102700 | -0.36889800 |
| N  | -8.31863800 | 0.43515800  | 0.16846000  |

|   |              |             |             |
|---|--------------|-------------|-------------|
| C | -6.71212400  | 2.85794300  | 0.39938000  |
| C | -8.13738100  | 2.74149600  | 0.94656800  |
| C | -8.95507000  | 1.74284700  | 0.16242200  |
| H | -9.11120100  | 2.08322400  | -0.86843900 |
| C | -9.18242800  | -0.69686900 | -0.11544400 |
| H | -10.17837300 | -0.45592700 | 0.25365000  |
| H | -9.26737600  | -0.84994400 | -1.19841700 |
| C | -8.64053900  | -1.92260700 | 0.57464200  |
| H | -9.30286600  | -2.77333500 | 0.40772000  |
| H | -8.62302100  | -1.72869600 | 1.65013400  |
| C | -7.22734900  | -2.28301200 | 0.09236000  |
| C | -6.37165000  | -1.00635200 | 0.02049500  |
| C | -4.99602500  | -1.07545100 | -0.15394500 |
| C | -4.14843500  | 0.06150600  | -0.09942400 |
| C | -4.77319800  | 1.30321500  | 0.10613400  |
| H | -4.15071900  | 2.17237000  | 0.23752000  |
| C | -6.12976200  | 1.45519900  | 0.22163400  |
| C | -6.96454200  | 0.29517200  | 0.13985800  |
| C | -6.72075700  | 3.57581200  | -0.96377500 |
| H | -5.70338700  | 3.68305000  | -1.34238400 |
| H | -7.15739300  | 4.57247000  | -0.86481600 |
| H | -7.29244000  | 3.02351800  | -1.70986400 |
| C | -5.89250900  | 3.69465100  | 1.39287700  |
| H | -4.89492800  | 3.92347400  | 1.01869900  |
| H | -5.79088600  | 3.17816000  | 2.34859000  |
| H | -6.39827300  | 4.64590200  | 1.56986900  |
| C | -7.32839100  | -2.96402000 | -1.28411400 |
| H | -6.35871200  | -3.31872100 | -1.62181600 |
| H | -7.72243900  | -2.28480500 | -2.04075200 |
| H | -7.99656600  | -3.82594600 | -1.21911500 |
| C | -6.67080200  | -3.28582000 | 1.12149500  |
| H | -6.52728700  | -2.80053400 | 2.08873600  |
| H | -7.39230800  | -4.09511600 | 1.25587400  |
| H | -5.72531600  | -3.71487600 | 0.80658100  |
| C | -3.85307100  | -2.51294000 | -1.67238800 |
| H | -2.96181900  | -1.90564500 | -1.83326300 |
| H | -4.58878000  | -2.28263200 | -2.44513000 |
| H | -9.94203000  | 1.62777100  | 0.61039200  |
| H | -8.09973800  | 2.42309900  | 1.99175400  |
| H | -8.62647600  | 3.71661200  | 0.91894600  |
| C | 4.67430700   | -0.58687700 | 1.60157400  |
| C | 5.21038800   | -1.75608100 | 2.14824900  |
| C | 4.00088900   | 0.30144900  | 2.43285400  |
| C | 5.06117200   | -2.04577400 | 3.49428100  |
| H | 5.75158500   | -2.44702500 | 1.51722200  |
| C | 3.83686300   | 0.02383400  | 3.78610100  |
| H | 3.59251600   | 1.21942700  | 2.03989700  |
| C | 4.36844100   | -1.14644800 | 4.28722200  |
| H | 5.47112500   | -2.94787600 | 3.92604400  |
| H | 3.31034400   | 0.70601400  | 4.43841100  |
| C | 4.42082000   | -1.40484700 | -0.81474600 |
| C | 4.87135500   | -1.40914600 | -2.13554200 |
| C | 3.48502700   | -2.35355700 | -0.41560600 |
| C | 4.40563200   | -2.34782200 | -3.04264000 |
| H | 5.59442500   | -0.67715100 | -2.46750100 |
| C | 2.99999700   | -3.29712300 | -1.31356600 |
| H | 3.11693800   | -2.36525200 | 0.59921800  |
| C | 3.47343600   | -3.27505200 | -2.60980000 |
| H | 4.75264700   | -2.36319500 | -4.06614700 |
| H | 2.26966500   | -4.03441000 | -1.01195900 |
| F | 4.21292400   | -1.42555400 | 5.60180000  |
| F | 3.01029300   | -4.19136900 | -3.49107200 |
| H | -3.58801300  | -3.56657200 | -1.72023200 |

**TCF5-based (Path II)**

**FP-INT-II-A**

|    |             |             |            |
|----|-------------|-------------|------------|
| Cl | -0.01775400 | -2.31888300 | 1.45886800 |
| O  | 5.14518200  | 1.39463400  | 0.15223000 |

|   |             |             |             |
|---|-------------|-------------|-------------|
| N | 7.85545500  | 3.54513800  | 0.39041800  |
| N | 7.48409800  | 2.54189800  | -3.84565000 |
| N | 4.65240600  | 0.43026700  | -4.48386700 |
| C | 7.28827600  | 2.96873700  | -0.43415800 |
| C | 7.06814100  | 2.40585200  | -2.77692000 |
| C | 4.67768200  | 0.56582200  | -3.33831600 |
| C | 6.59826600  | 2.26626700  | -1.45147500 |
| C | 5.51259000  | 1.47673100  | -1.12271000 |
| C | 4.64297200  | 0.68575800  | -1.93430200 |
| C | 3.71055100  | 0.05457700  | -1.12498800 |
| C | 4.01727400  | 0.44163600  | 0.31555000  |
| C | 2.66855200  | -0.76996100 | -1.57093700 |
| H | 2.61790600  | -0.92958500 | -2.63951900 |
| C | 1.75437500  | -1.37146300 | -0.74252400 |
| H | 1.83432800  | -1.18303900 | 0.31530200  |
| C | 0.71934300  | -2.24182300 | -1.14577600 |
| C | 0.56489100  | -2.60059700 | -2.60818100 |
| H | 1.31295900  | -3.35792300 | -2.86581300 |
| H | 0.79343400  | -1.72449500 | -3.21534100 |
| C | -0.82867700 | -3.10554000 | -2.95358100 |
| H | -1.53815800 | -2.27695900 | -2.90288200 |
| C | -1.26064000 | -4.20284800 | -1.99121500 |
| H | -0.62337900 | -5.08320100 | -2.12615500 |
| H | -2.28094800 | -4.52229800 | -2.19790700 |
| C | -1.16539500 | -3.74031200 | -0.55634900 |
| C | -0.14799600 | -2.79736700 | -0.22454000 |
| C | -2.03395700 | -4.20943600 | 0.37877200  |
| H | -1.99317900 | -3.89566500 | 1.41371000  |
| O | -2.98549500 | -5.07198000 | 0.05480500  |
| C | -3.85619900 | -5.51455000 | 1.12922900  |
| H | -3.25951100 | -6.10994200 | 1.82244100  |
| H | -4.23156300 | -4.63275100 | 1.65065000  |
| C | -4.97476800 | -6.32024200 | 0.51992600  |
| H | -5.55757800 | -5.71455100 | -0.17462100 |
| H | -4.58383500 | -7.18780300 | -0.01222700 |
| H | -5.63830000 | -6.67159700 | 1.31088100  |
| H | -2.87705200 | -1.04479900 | 0.52285300  |
| O | -6.27427000 | 4.22882500  | 0.68242600  |
| N | -3.12318800 | 0.79848000  | -0.47996100 |
| C | -5.27538100 | -1.15545400 | -0.89885700 |
| C | -3.83614900 | -1.33549200 | -1.39152700 |
| C | -2.85183300 | -0.62498700 | -0.49381600 |
| C | -2.06832600 | 1.60268500  | 0.10372400  |
| H | -1.11277400 | 1.21325100  | -0.24961000 |
| H | -2.06443300 | 1.51555300  | 1.20060700  |
| C | -2.25256300 | 3.03513800  | -0.32785300 |
| H | -1.43484600 | 3.65672100  | 0.03872100  |
| H | -2.21880800 | 3.06309000  | -1.42004500 |
| C | -3.58524400 | 3.62390400  | 0.16372900  |
| C | -4.70660200 | 2.57775700  | 0.04089900  |
| C | -6.04450500 | 2.94207900  | 0.28125400  |
| C | -7.08733600 | 2.03405800  | 0.13140000  |
| H | -8.11038000 | 2.32035500  | 0.31557000  |
| C | -6.79550200 | 0.73874100  | -0.26345200 |
| H | -7.61669800 | 0.04494800  | -0.38446400 |
| C | -5.50189300 | 0.30156400  | -0.48920200 |
| C | -4.43834300 | 1.22552200  | -0.30423400 |
| C | -5.53104900 | -2.08375300 | 0.30282700  |
| H | -6.54442000 | -1.95327600 | 0.68431700  |
| H | -5.41199400 | -3.12734900 | 0.00287100  |
| H | -4.83976500 | -1.87970100 | 1.12116800  |
| C | -6.21745300 | -1.56651700 | -2.04192000 |
| H | -7.26289400 | -1.56868400 | -1.73381000 |
| H | -6.11343900 | -0.88978400 | -2.89162400 |
| H | -5.97093200 | -2.57692000 | -2.37685200 |
| C | -3.41934800 | 4.06063600  | 1.63210800  |
| H | -4.34917800 | 4.46053100  | 2.02952000  |
| H | -3.11183900 | 3.22166300  | 2.25710100  |
| H | -2.64915800 | 4.83207700  | 1.70488900  |
| C | -3.85072300 | 4.86202400  | -0.71599300 |
| H | -4.05844300 | 4.56045000  | -1.74474500 |



|   |             |             |             |
|---|-------------|-------------|-------------|
| H | -2.95718100 | 5.49142600  | -0.72530900 |
| H | -4.68499200 | 5.45491000  | -0.35539100 |
| C | -7.60775800 | 4.64756000  | 0.92612600  |
| H | -8.06677300 | 4.07245400  | 1.73426400  |
| H | -1.83502200 | -0.75878800 | -0.86092500 |
| H | -3.74114600 | -0.92674100 | -2.40110000 |
| H | -3.60047000 | -2.39883300 | -1.44639900 |
| H | -7.54157000 | 5.69218200  | 1.22048900  |
| C | 2.87267300  | 1.22381600  | 0.94744000  |
| C | 2.13126300  | 0.71378000  | 2.00867700  |
| C | 2.53207100  | 2.46879000  | 0.41713700  |
| C | 1.07284600  | 1.43402100  | 2.54834800  |
| H | 2.37096200  | -0.25100900 | 2.42945800  |
| C | 1.48655700  | 3.20606300  | 0.95035900  |
| H | 3.08961400  | 2.87995200  | -0.41281800 |
| C | 0.77992400  | 2.67230700  | 2.01397100  |
| H | 0.49209800  | 1.04531800  | 3.37258100  |
| H | 1.22406600  | 4.17739500  | 0.55613300  |
| C | 4.57421300  | -0.68048700 | 1.17553600  |
| C | 4.69693300  | -1.98995000 | 0.72329800  |
| C | 5.04261600  | -0.35532900 | 2.45162900  |
| C | 5.25234600  | -2.97323100 | 1.53538100  |
| H | 4.36149100  | -2.26562700 | -0.26420400 |
| C | 5.60307000  | -1.32061700 | 3.27121700  |
| H | 4.97122800  | 0.66230700  | 2.80889900  |
| C | 5.69070800  | -2.61764600 | 2.79426400  |
| H | 5.34667200  | -3.99431700 | 1.19407500  |
| H | 5.96688500  | -1.07894900 | 4.25987500  |
| F | -0.23280900 | 3.39011600  | 2.54691400  |
| F | 6.23077000  | -3.56746100 | 3.59121300  |
| H | -8.22436400 | 4.56276500  | 0.02783400  |
| H | -0.84416500 | -3.47731000 | -3.97848600 |

#### FP-TS-II-A

|    |             |             |             |
|----|-------------|-------------|-------------|
| Cl | -0.42744700 | -1.26164400 | 1.22774400  |
| O  | 5.58696900  | 1.03193100  | 0.20077600  |
| N  | 8.54297900  | 2.78708200  | 0.50813900  |
| N  | 9.24328800  | -0.16975200 | -2.62753300 |
| N  | 6.23444900  | -2.12336400 | -3.30475200 |
| C  | 8.12651700  | 1.91674800  | -0.13132200 |
| C  | 8.50096200  | 0.28096500  | -1.86268000 |
| C  | 5.97175000  | -1.41228900 | -2.43061000 |
| C  | 7.62958500  | 0.85581200  | -0.91710800 |
| C  | 6.31645900  | 0.41210900  | -0.73682600 |
| C  | 5.56415100  | -0.58845300 | -1.37127700 |
| C  | 4.26522100  | -0.63900100 | -0.79563800 |
| C  | 4.24758700  | 0.40971200  | 0.31357100  |
| C  | 3.22570800  | -1.43566600 | -1.19310600 |
| H  | 3.41802100  | -2.08873000 | -2.03457000 |
| C  | 1.95819500  | -1.47374500 | -0.57428500 |
| H  | 1.82414600  | -0.86300000 | 0.30329000  |
| C  | 0.88623300  | -2.23346100 | -0.96601900 |
| C  | 0.94973800  | -3.12494700 | -2.18681600 |
| H  | 1.36700000  | -4.09745400 | -1.90142100 |
| H  | 1.63385600  | -2.69516700 | -2.91715100 |
| C  | -0.42005400 | -3.32957800 | -2.82107500 |
| H  | -0.78398500 | -2.37520800 | -3.21215700 |
| C  | -1.40859600 | -3.86496300 | -1.79686100 |
| H  | -1.15385500 | -4.89654000 | -1.53006600 |
| H  | -2.41466000 | -3.90945100 | -2.21504600 |
| C  | -1.42488800 | -3.02472200 | -0.54186000 |
| C  | -0.33601900 | -2.25611500 | -0.22403000 |
| C  | -2.62802400 | -3.03747600 | 0.25038100  |
| H  | -2.55695600 | -2.69970100 | 1.28099200  |
| O  | -3.44972800 | -4.10258700 | 0.04749700  |
| C  | -3.94429400 | -4.75719600 | 1.23660800  |
| H  | -3.09847600 | -5.24117300 | 1.73064500  |
| H  | -4.35644500 | -4.00854300 | 1.91505500  |
| C  | -4.98681100 | -5.76382900 | 0.81874700  |

|   |             |             |             |
|---|-------------|-------------|-------------|
| H | -5.82770700 | -5.27560100 | 0.32492200  |
| H | -4.56147200 | -6.49968100 | 0.13576400  |
| H | -5.36073500 | -6.28725400 | 1.69953000  |
| H | -3.34618800 | -1.96830500 | -0.23505200 |
| O | -5.55529400 | 4.35891800  | 0.66784200  |
| N | -3.80859800 | 0.14986400  | -0.82733200 |
| C | -6.28369000 | -1.20148800 | -0.24174500 |
| C | -5.32019400 | -1.69449400 | -1.32758800 |
| C | -3.93556300 | -1.15945800 | -1.16478500 |
| C | -2.46862100 | 0.72808700  | -0.84439500 |
| H | -1.83181500 | 0.07522500  | -1.43854500 |
| H | -2.07055600 | 0.72956100  | 0.17270100  |
| C | -2.52908900 | 2.11740700  | -1.42070000 |
| H | -1.52388900 | 2.53392900  | -1.48609100 |
| H | -2.92067600 | 2.05322800  | -2.43899100 |
| C | -3.41193300 | 3.05367000  | -0.58356000 |
| C | -4.69932900 | 2.32559100  | -0.17235000 |
| C | -5.76923300 | 3.04280100  | 0.40212900  |
| C | -6.98229800 | 2.42681700  | 0.68488100  |
| H | -7.80276800 | 2.98623200  | 1.10526500  |
| C | -7.14265500 | 1.07588300  | 0.42422400  |
| H | -8.09527900 | 0.61902100  | 0.64892100  |
| C | -6.11455600 | 0.30229700  | -0.08126500 |
| C | -4.88163500 | 0.93562200  | -0.35258300 |
| C | -5.98191300 | -1.87046100 | 1.11018900  |
| H | -6.67376000 | -1.50285200 | 1.86820800  |
| H | -6.10318400 | -2.95103800 | 1.03549500  |
| H | -4.97218200 | -1.64970600 | 1.45641600  |
| C | -7.70348700 | -1.58890900 | -0.67520100 |
| H | -8.43819300 | -1.38214400 | 0.10179800  |
| H | -7.99795100 | -1.05510900 | -1.57977200 |
| H | -7.74076900 | -2.66014800 | -0.88130900 |
| C | -2.63899300 | 3.50562500  | 0.66998100  |
| H | -3.25823100 | 4.14035800  | 1.29921600  |
| H | -2.31625400 | 2.65132000  | 1.26711900  |
| H | -1.75535100 | 4.07175900  | 0.37276200  |
| C | -3.69573600 | 4.27330600  | -1.48406800 |
| H | -4.34686300 | 3.99325400  | -2.31426200 |
| H | -2.75073900 | 4.62662100  | -1.90210100 |
| H | -4.15860700 | 5.09042600  | -0.94203700 |
| C | -6.61074600 | 5.13633400  | 1.21897000  |
| H | -6.91389000 | 4.75718200  | 2.19747600  |
| H | -3.21412400 | -1.46064100 | -1.92228700 |
| H | -5.67947000 | -1.36518300 | -2.30963500 |
| H | -5.28737500 | -2.78360400 | -1.35051200 |
| H | -6.21000600 | 6.14048900  | 1.32843000  |
| C | 3.22989100  | 1.50320800  | 0.01217200  |
| C | 2.07376400  | 1.66815500  | 0.76719500  |
| C | 3.43141500  | 2.31840800  | -1.10258700 |
| C | 1.12801400  | 2.62823600  | 0.42534400  |
| H | 1.89205100  | 1.04704000  | 1.63141900  |
| C | 2.50326500  | 3.28534500  | -1.45612800 |
| H | 4.32088600  | 2.20255800  | -1.70578800 |
| C | 1.36538800  | 3.41917200  | -0.68030200 |
| H | 0.22853100  | 2.75898200  | 1.00802500  |
| H | 2.65366200  | 3.92444700  | -2.31485400 |
| C | 4.18517000  | -0.14125700 | 1.72834000  |
| C | 4.07554900  | -1.50048900 | 1.99965600  |
| C | 4.30660600  | 0.75486800  | 2.79366000  |
| C | 4.06040400  | -1.96659700 | 3.31047000  |
| H | 3.99783000  | -2.21143000 | 1.19142300  |
| C | 4.29885800  | 0.30892900  | 4.10539200  |
| H | 4.40993000  | 1.81296000  | 2.59735500  |
| C | 4.16913900  | -1.05006600 | 4.33590700  |
| H | 3.97029800  | -3.02107200 | 3.53028000  |
| H | 4.39125300  | 0.99483100  | 4.93573400  |
| F | 0.45295200  | 4.36130500  | -1.02212000 |
| F | 4.15306400  | -1.49376300 | 5.61536000  |
| H | -7.47582600 | 5.16021200  | 0.55258400  |
| H | -0.34446200 | -4.01641200 | -3.66485400 |

## FP-INT-II-B

|    |             |             |             |
|----|-------------|-------------|-------------|
| Cl | 1.46207800  | 0.35963100  | 1.48988000  |
| O  | -4.99571200 | -0.61760500 | -0.09514500 |
| N  | -8.19303000 | -1.87430600 | -0.37209400 |
| N  | -7.70036800 | 0.84959700  | -3.75043800 |
| N  | -4.32608300 | 2.32301500  | -3.77766700 |
| C  | -7.51127300 | -1.13501000 | -0.94769300 |
| C  | -7.22972200 | 0.36787500  | -2.80794700 |
| C  | -4.39221200 | 1.64188600  | -2.84284900 |
| C  | -6.69211900 | -0.23520100 | -1.65678700 |
| C  | -5.38825300 | 0.03084500  | -1.20560400 |
| C  | -4.36986600 | 0.84551700  | -1.69256000 |
| C  | -3.21806200 | 0.73486900  | -0.83552800 |
| C  | -3.64377500 | -0.17209600 | 0.31493300  |
| C  | -2.03436300 | 1.37436200  | -0.99766600 |
| H  | -1.98853000 | 2.07143100  | -1.82610500 |
| C  | -0.87423400 | 1.25108300  | -0.16635100 |
| H  | -0.80255900 | 0.36508700  | 0.44737900  |
| C  | 0.12243800  | 2.16978600  | -0.07293500 |
| C  | -0.00277200 | 3.52831000  | -0.73599700 |
| H  | -0.65844200 | 4.14299200  | -0.10859500 |
| H  | -0.51379000 | 3.42877300  | -1.69322400 |
| C  | 1.32013200  | 4.25737200  | -0.93647300 |
| H  | 1.88605900  | 3.79403700  | -1.74681900 |
| C  | 2.16342600  | 4.23953800  | 0.32871000  |
| H  | 1.71384900  | 4.88934200  | 1.09034200  |
| H  | 3.15800600  | 4.63807000  | 0.13206700  |
| C  | 2.30063000  | 2.85565200  | 0.91002500  |
| C  | 1.31987100  | 1.95250900  | 0.72196800  |
| C  | 3.53380500  | 2.60875800  | 1.72128600  |
| H  | 3.49898000  | 3.22034900  | 2.63675900  |
| H  | 1.12695400  | 5.28525800  | -1.24695300 |
| O  | 4.67335400  | 2.97692500  | 0.95384900  |
| C  | 5.89017400  | 2.75294100  | 1.65216300  |
| H  | 5.87699400  | 3.30626400  | 2.60039400  |
| H  | 5.98194500  | 1.68668000  | 1.89516800  |
| C  | 7.04219200  | 3.20849300  | 0.78508700  |
| H  | 7.06363200  | 2.65706300  | -0.15552900 |
| H  | 6.95809900  | 4.27229600  | 0.55810000  |
| H  | 7.98827300  | 3.04068500  | 1.30208200  |
| H  | 3.61132800  | 1.56354000  | 2.02333900  |
| O  | 5.22272500  | -2.68644700 | 1.43422100  |
| N  | 1.87893900  | -1.14901600 | -1.63478600 |
| C  | 3.64246300  | 0.80183400  | -2.75943700 |
| C  | 2.12746300  | 1.00302900  | -2.72534400 |
| C  | 1.37500500  | -0.19440000 | -2.33707500 |
| C  | 0.97520800  | -2.21910400 | -1.15506000 |
| H  | 0.16641200  | -2.30812600 | -1.87353900 |
| H  | 0.55952700  | -1.87525900 | -0.20909200 |
| C  | 1.74972300  | -3.49616700 | -0.99806400 |
| H  | 1.06860900  | -4.29529500 | -0.71095000 |
| H  | 2.18253200  | -3.77155600 | -1.96286200 |
| C  | 2.85895700  | -3.36742400 | 0.05504400  |
| C  | 3.64362100  | -2.07945800 | -0.20813300 |
| C  | 4.87049800  | -1.82828700 | 0.44645200  |
| C  | 5.66069800  | -0.74483100 | 0.08682700  |
| H  | 6.60291400  | -0.56542700 | 0.57957400  |
| C  | 5.26105300  | 0.10458200  | -0.93427000 |
| H  | 5.91710200  | 0.90948900  | -1.22430100 |
| C  | 4.04332300  | -0.04990300 | -1.56351100 |
| C  | 3.22670300  | -1.11214600 | -1.13495900 |
| C  | 4.31344300  | 2.17806200  | -2.75695000 |
| H  | 5.38341400  | 2.09979600  | -2.94680100 |
| H  | 3.88677100  | 2.79394000  | -3.55008600 |
| H  | 4.17098800  | 2.68518300  | -1.80259800 |
| C  | 4.02792300  | 0.04095300  | -4.04310100 |
| H  | 5.10345800  | -0.13473900 | -4.06629200 |
| H  | 3.52667600  | -0.92665400 | -4.10419200 |
| H  | 3.75266000  | 0.62427600  | -4.92402200 |
| C  | 2.25062500  | -3.36546100 | 1.46857100  |

|   |             |             |             |
|---|-------------|-------------|-------------|
| H | 3.03020100  | -3.28191600 | 2.22144900  |
| H | 1.55858300  | -2.53641900 | 1.60915500  |
| H | 1.70449700  | -4.29507000 | 1.63452300  |
| C | 3.75572300  | -4.60950500 | -0.12173900 |
| H | 4.27432500  | -4.57664300 | -1.08138000 |
| H | 3.12379200  | -5.49976600 | -0.11010600 |
| H | 4.49258200  | -4.69980500 | 0.66879700  |
| C | 6.46255400  | -2.49431300 | 2.10861900  |
| H | 6.48791100  | -1.52935300 | 2.61900800  |
| H | 0.32596400  | -0.28297700 | -2.58560400 |
| H | 1.74737400  | 1.37820300  | -3.67649700 |
| H | 1.85875400  | 1.75689200  | -1.97667100 |
| H | 6.52482500  | -3.29423500 | 2.84084600  |
| H | 7.30328900  | -2.56618100 | 1.41553000  |
| C | -2.81614800 | -1.44577700 | 0.43673700  |
| C | -2.04868000 | -1.73180200 | 1.56145000  |
| C | -2.86407900 | -2.37602800 | -0.60289200 |
| C | -1.36991800 | -2.94077200 | 1.67401100  |
| H | -1.98309700 | -1.02069300 | 2.37113800  |
| C | -2.19692400 | -3.58779100 | -0.50790200 |
| H | -3.44698500 | -2.16562600 | -1.48878700 |
| C | -1.47382000 | -3.85084600 | 0.64228100  |
| H | -0.78443100 | -3.17553900 | 2.55092100  |
| H | -2.24252700 | -4.32139300 | -1.30051100 |
| C | -3.84891300 | 0.55127200  | 1.64103100  |
| C | -4.53069800 | -0.12495800 | 2.65701000  |
| C | -3.41783000 | 1.85204800  | 1.87245300  |
| C | -4.76593000 | 0.47530600  | 3.88335900  |
| H | -4.88495700 | -1.13204400 | 2.48755500  |
| C | -3.63946800 | 2.46982200  | 3.10011700  |
| H | -2.90452100 | 2.39902800  | 1.09799200  |
| C | -4.30703300 | 1.76650100  | 4.08078200  |
| H | -5.29383600 | -0.04095800 | 4.67289600  |
| H | -3.30473300 | 3.48050200  | 3.28741500  |
| F | -0.83791100 | -5.04273000 | 0.75317200  |
| F | -4.52794500 | 2.35975100  | 5.27906100  |

#### FP-TS-II-B

|    |             |             |             |
|----|-------------|-------------|-------------|
| Cl | -0.95146400 | -0.19631900 | 1.18537400  |
| O  | 5.35112900  | 0.73350700  | -0.16936000 |
| N  | 8.49252600  | 2.13178300  | -0.53057500 |
| N  | 8.77269500  | -1.88277500 | -2.22800100 |
| N  | 5.59327500  | -3.62193600 | -2.07459800 |
| C  | 7.96666000  | 1.13112000  | -0.77499100 |
| C  | 8.10852000  | -1.09010600 | -1.71063600 |
| C  | 5.41834500  | -2.59532600 | -1.57304000 |
| C  | 7.33445900  | -0.09499500 | -1.07875100 |
| C  | 5.99327300  | -0.28004200 | -0.75625400 |
| C  | 5.11957300  | -1.37273000 | -0.94861700 |
| C  | 3.84400700  | -1.04270000 | -0.45016100 |
| C  | 3.96735900  | 0.33473100  | 0.19079800  |
| C  | 2.70996100  | -1.82526200 | -0.53457000 |
| H  | 2.83949200  | -2.79913200 | -0.98817100 |
| C  | 1.44982700  | -1.45386800 | -0.06544400 |
| H  | 1.34592700  | -0.46011900 | 0.34167300  |
| C  | 0.31843400  | -2.26021900 | -0.04724900 |
| C  | 0.39431900  | -3.69636400 | -0.52740200 |
| H  | 0.87292700  | -4.29098600 | 0.25829400  |
| H  | 1.05064700  | -3.75532100 | -1.39566200 |
| C  | -0.95926400 | -4.30138400 | -0.87824100 |
| H  | -1.29563400 | -3.89804900 | -1.83483200 |
| C  | -2.00538000 | -4.01250800 | 0.18851700  |
| H  | -1.75466200 | -4.53721300 | 1.11742600  |
| H  | -2.98071700 | -4.38241400 | -0.12154800 |
| C  | -2.11069900 | -2.52199200 | 0.48097200  |
| C  | -0.89155900 | -1.81932600 | 0.50884300  |
| C  | -3.17559400 | -2.11520600 | 1.48883700  |
| H  | -2.75270800 | -2.16742500 | 2.50322200  |
| H  | -0.85385500 | -5.37856400 | -1.01562100 |

|   |             |             |             |
|---|-------------|-------------|-------------|
| O | -4.28705300 | -2.98009500 | 1.39882800  |
| C | -5.29729400 | -2.65885900 | 2.34743800  |
| H | -4.89715200 | -2.78602100 | 3.36174900  |
| H | -5.58266400 | -1.60674400 | 2.23390200  |
| C | -6.48614300 | -3.56467400 | 2.11926700  |
| H | -6.89689600 | -3.42041500 | 1.11913600  |
| H | -6.20182900 | -4.61239900 | 2.22820800  |
| H | -7.26819600 | -3.34364300 | 2.84726700  |
| H | -3.49474800 | -1.08250200 | 1.32133500  |
| O | -5.57915400 | 2.90651300  | 1.40663500  |
| N | -2.71637900 | 0.73630000  | -1.76361400 |
| C | -4.51609200 | -1.42921900 | -2.11060500 |
| C | -3.00760100 | -1.60451600 | -2.13216000 |
| C | -2.26667200 | -0.43259300 | -2.22006600 |
| C | -1.77050500 | 1.85404000  | -1.69996900 |
| H | -1.14182000 | 1.80592700  | -2.58630100 |
| H | -1.12986900 | 1.70957900  | -0.82742800 |
| C | -2.52012100 | 3.15542600  | -1.62662200 |
| H | -1.80849200 | 3.98017700  | -1.61180200 |
| H | -3.12652200 | 3.26683100  | -2.52908700 |
| C | -3.42501400 | 3.24022700  | -0.38888300 |
| C | -4.24857400 | 1.95132200  | -0.29025200 |
| C | -5.36912100 | 1.86175200  | 0.56283800  |
| C | -6.20163300 | 0.74925600  | 0.54287400  |
| H | -7.06587900 | 0.69571000  | 1.18562700  |
| C | -5.92868900 | -0.30401100 | -0.31807700 |
| H | -6.60398900 | -1.14601600 | -0.33855200 |
| C | -4.80568600 | -0.30795000 | -1.12028300 |
| C | -3.94662600 | 0.81284400  | -1.05952900 |
| C | -5.20298700 | -2.75146300 | -1.76414700 |
| H | -6.28564900 | -2.67335500 | -1.86883800 |
| H | -4.86476600 | -3.52177300 | -2.45974800 |
| H | -4.97230400 | -3.06784600 | -0.75009400 |
| C | -4.99445100 | -0.98568200 | -3.51349500 |
| H | -6.07689800 | -0.84589200 | -3.50986500 |
| H | -4.52895500 | -0.04718100 | -3.81629800 |
| H | -4.74592800 | -1.74730200 | -4.25558300 |
| C | -2.57374600 | 3.44373900  | 0.87704600  |
| H | -3.20733000 | 3.50410900  | 1.75949300  |
| H | -1.87024300 | 2.62466000  | 1.02472600  |
| H | -2.00488000 | 4.37266200  | 0.79654800  |
| C | -4.32028100 | 4.47617700  | -0.61125100 |
| H | -5.01804100 | 4.30253500  | -1.43244600 |
| H | -3.68665000 | 5.32345600  | -0.88192100 |
| H | -4.88772800 | 4.73997200  | 0.27431200  |
| C | -6.71102500 | 2.88242000  | 2.26768100  |
| H | -6.66528800 | 2.03743400  | 2.95841700  |
| H | -1.24326900 | -0.42931400 | -2.57086800 |
| H | -2.62861600 | -2.44091400 | -2.70829200 |
| H | -2.57863800 | -2.01967800 | -0.78348300 |
| H | -6.67350300 | 3.81173500  | 2.82954200  |
| H | -7.64173300 | 2.83820600  | 1.69771700  |
| C | 3.05224900  | 1.37130000  | -0.44678400 |
| C | 2.13467300  | 2.11325300  | 0.28924000  |
| C | 3.14514800  | 1.58028200  | -1.82415500 |
| C | 1.33521700  | 3.06988400  | -0.32742900 |
| H | 2.03109400  | 1.95600400  | 1.35204900  |
| C | 2.35554400  | 2.52696500  | -2.45612000 |
| H | 3.84642600  | 1.00503600  | -2.41325100 |
| C | 1.46884300  | 3.26077300  | -1.68704100 |
| H | 0.62714100  | 3.65696800  | 0.23928000  |
| H | 2.42511300  | 2.70151800  | -3.52052300 |
| C | 3.94241200  | 0.32399200  | 1.71351400  |
| C | 4.41042600  | 1.45901900  | 2.38211700  |
| C | 3.50374200  | -0.76397000 | 2.45968700  |
| C | 4.42433800  | 1.51716200  | 3.76604200  |
| H | 4.77039200  | 2.30627700  | 1.81599200  |
| C | 3.50626900  | -0.72135300 | 3.85065200  |
| H | 3.15590500  | -1.65966300 | 1.97033000  |
| C | 3.96378500  | 0.42052000  | 4.47450400  |
| H | 4.78442400  | 2.39128900  | 4.29008000  |

|   |            |             |             |
|---|------------|-------------|-------------|
| H | 3.16520100 | -1.56281300 | 4.43708400  |
| F | 0.69988400 | 4.19444400  | -2.29596500 |
| F | 3.96970600 | 0.47085900  | 5.82732800  |

#### TCF-A6(+2H)

|    |             |             |             |
|----|-------------|-------------|-------------|
| Cl | 3.05344000  | -0.69001700 | 1.53655700  |
| O  | -3.22796800 | 0.43598700  | 0.19229700  |
| N  | -6.55958000 | 1.41152300  | 0.32367700  |
| N  | -5.92877000 | -0.19977000 | -3.68934500 |
| N  | -2.60949000 | -1.43132200 | -4.14474200 |
| C  | -5.83449800 | 0.93636200  | -0.43832100 |
| C  | -5.46888700 | 0.03882600  | -2.65793900 |
| C  | -2.61744800 | -0.99143100 | -3.07924200 |
| C  | -4.95054800 | 0.35158200  | -1.37938300 |
| C  | -3.64066100 | 0.11223500  | -1.02641300 |
| C  | -2.55653000 | -0.47110000 | -1.76805100 |
| C  | -1.42408000 | -0.47197400 | -0.98741800 |
| C  | -1.77511500 | 0.16509100  | 0.34919900  |
| C  | -0.16645300 | -0.99924100 | -1.36623800 |
| H  | -0.10969100 | -1.41851800 | -2.36188900 |
| C  | 0.93437600  | -0.96667400 | -0.57067500 |
| H  | 0.84096100  | -0.54357900 | 0.41581900  |
| C  | 2.24844600  | -1.39077200 | -0.94894600 |
| C  | 2.46569300  | -1.99089200 | -2.32083100 |
| H  | 2.40711400  | -1.19715500 | -3.07263900 |
| H  | 1.64391500  | -2.67723700 | -2.53270200 |
| C  | 3.79580300  | -2.72368100 | -2.43585900 |
| H  | 3.75908900  | -3.64381600 | -1.84497500 |
| C  | 4.92148000  | -1.83376500 | -1.93748100 |
| H  | 4.94288500  | -0.91388600 | -2.52599900 |
| H  | 5.89170800  | -2.31783100 | -2.05767000 |
| C  | 4.74349500  | -1.46966800 | -0.45715400 |
| C  | 3.30124000  | -1.22460300 | -0.11079400 |
| C  | 5.61878200  | -0.27054600 | -0.08411900 |
| H  | 5.65678100  | -0.13911200 | 1.00133800  |
| H  | 3.96666800  | -3.01541800 | -3.47292200 |
| O  | 5.08263200  | 0.88581800  | -0.69581600 |
| C  | 5.77640000  | 2.07826400  | -0.35282600 |
| H  | 5.78939400  | 2.19140400  | 0.73877300  |
| H  | 6.81847900  | 2.00822200  | -0.69052900 |
| C  | 5.07593500  | 3.24989600  | -1.00420600 |
| H  | 5.07060500  | 3.14249300  | -2.09000700 |
| H  | 4.04374900  | 3.32188600  | -0.65739400 |
| H  | 5.58901200  | 4.17958500  | -0.75345300 |
| H  | 6.64065500  | -0.45763400 | -0.43673600 |
| H  | 5.08556700  | -2.30724900 | 0.16280800  |
| C  | -1.62953000 | -0.83615900 | 1.48877300  |
| C  | -0.66197700 | -0.68658900 | 2.47755000  |
| C  | -2.44443400 | -1.96891100 | 1.50024800  |
| C  | -0.50436000 | -1.64716300 | 3.46894500  |
| H  | -0.01580500 | 0.17817100  | 2.48566200  |
| C  | -2.30736900 | -2.93257900 | 2.48672800  |
| H  | -3.19889400 | -2.10862400 | 0.73878700  |
| C  | -1.33371200 | -2.75071300 | 3.45351400  |
| H  | 0.24632600  | -1.53977500 | 4.23886100  |
| H  | -2.93804300 | -3.80998400 | 2.50855400  |
| C  | -1.14354800 | 1.52297700  | 0.60292900  |
| C  | -1.54418900 | 2.22769500  | 1.74132700  |
| C  | -0.24112200 | 2.11338100  | -0.27619600 |
| C  | -1.03603400 | 3.48687100  | 2.01307900  |
| H  | -2.26026800 | 1.79025000  | 2.42267000  |
| C  | 0.28448200  | 3.37398300  | -0.01473600 |
| H  | 0.07114900  | 1.60351400  | -1.17388800 |
| C  | -0.12167200 | 4.03241700  | 1.12775600  |
| H  | -1.33769200 | 4.03887400  | 2.89192600  |
| H  | 0.99307100  | 3.83586600  | -0.68743000 |
| F  | -1.19069100 | -3.68887800 | 4.41625100  |
| F  | 0.38608600  | 5.25706400  | 1.39188900  |

FP-INT-II-C

|    |             |             |             |
|----|-------------|-------------|-------------|
| Cl | -1.66811000 | -0.98891600 | 0.92208100  |
| O  | 4.75731800  | 0.19121400  | 0.78576900  |
| N  | 7.92455800  | 1.30739200  | 1.64847400  |
| N  | 8.46451600  | -2.72007600 | 0.04229300  |
| N  | 5.33518100  | -4.25412200 | -0.81840600 |
| C  | 7.44339800  | 0.36002000  | 1.19550500  |
| C  | 7.72652100  | -1.87167700 | 0.30613500  |
| C  | 5.06574700  | -3.18590100 | -0.47472900 |
| C  | 6.86207100  | -0.80529000 | 0.64063400  |
| C  | 5.49434900  | -0.86154500 | 0.44379100  |
| C  | 4.65920500  | -1.89825300 | -0.07170600 |
| C  | 3.33985300  | -1.46530800 | -0.07441500 |
| C  | 3.33918300  | -0.01054100 | 0.38027200  |
| C  | 2.23203600  | -2.23288200 | -0.45688400 |
| H  | 2.45758600  | -3.20513700 | -0.87646200 |
| C  | 0.91977000  | -1.86920300 | -0.26816700 |
| H  | 0.71999500  | -0.94543100 | 0.24913100  |
| C  | -0.20175600 | -2.63616000 | -0.64405500 |
| C  | -0.04347700 | -3.82684400 | -1.56324500 |
| H  | 0.18082700  | -4.72201700 | -0.97299300 |
| H  | 0.81125000  | -3.66230700 | -2.21901000 |
| C  | -1.29901200 | -4.05680700 | -2.39584700 |
| H  | -1.44722500 | -3.20258100 | -3.06212200 |
| C  | -2.51574900 | -4.22132900 | -1.49743300 |
| H  | -2.45340700 | -5.17476100 | -0.96237300 |
| H  | -3.43065200 | -4.26100100 | -2.08898300 |
| C  | -2.63072400 | -3.09987700 | -0.48896200 |
| C  | -1.46796700 | -2.34130500 | -0.17046300 |
| C  | -3.82063800 | -2.86203800 | 0.12854600  |
| H  | -3.94262900 | -2.08985100 | 0.87520500  |
| H  | -1.17625700 | -4.93942200 | -3.02431400 |
| O  | -4.89141100 | -3.57816000 | -0.16797200 |
| C  | -6.08600100 | -3.37533300 | 0.63014700  |
| H  | -6.12750900 | -4.19680700 | 1.34639200  |
| H  | -5.98710200 | -2.43544500 | 1.17202900  |
| C  | -7.28856000 | -3.36925900 | -0.28076000 |
| H  | -7.24251500 | -2.53662500 | -0.98296600 |
| H  | -7.35587000 | -4.30063500 | -0.84348600 |
| H  | -8.19399500 | -3.26480300 | 0.31881800  |
| O  | -0.37868500 | 3.50217000  | -0.19305000 |
| N  | -4.11641200 | 0.67665700  | -1.19113200 |
| C  | -5.33613800 | 1.19733100  | 1.42363900  |
| C  | -5.89677700 | 0.28711200  | 0.36733400  |
| C  | -5.29398700 | 0.07308200  | -0.80099400 |
| C  | -3.44867400 | 0.19777200  | -2.38851400 |
| H  | -4.19970800 | -0.25702500 | -3.03296800 |
| H  | -2.72150000 | -0.58163800 | -2.13744800 |
| C  | -2.77992200 | 1.36014100  | -3.07721500 |
| H  | -2.30465000 | 1.02798900  | -4.00206000 |
| H  | -3.54753200 | 2.09024500  | -3.34714000 |
| C  | -1.72200700 | 2.02891800  | -2.18561000 |
| C  | -2.27409100 | 2.20729600  | -0.76296000 |
| C  | -1.59606700 | 3.00338000  | 0.17712000  |
| C  | -2.12817800 | 3.25158100  | 1.43748900  |
| H  | -1.61372200 | 3.88170000  | 2.14563400  |
| C  | -3.33658300 | 2.67027600  | 1.78635200  |
| H  | -3.73951100 | 2.87639200  | 2.76890200  |
| C  | -4.02390400 | 1.82168500  | 0.93591100  |
| C  | -3.46961000 | 1.57555500  | -0.34316600 |
| C  | -5.09684400 | 0.37806700  | 2.71064700  |
| H  | -4.77370000 | 1.01457600  | 3.53587900  |
| H  | -6.01905300 | -0.12320400 | 3.01377100  |
| H  | -4.33021900 | -0.37994200 | 2.54820600  |
| C  | -6.37119200 | 2.30143600  | 1.72886200  |
| H  | -6.02918200 | 2.95778500  | 2.53085600  |
| H  | -6.55443200 | 2.90855100  | 0.84154500  |
| H  | -7.31788400 | 1.85280200  | 2.03969600  |
| C  | -0.45922400 | 1.15346500  | -2.16069000 |
| H  | 0.30995400  | 1.60086300  | -1.53853900 |

|   |             |             |             |
|---|-------------|-------------|-------------|
| H | -0.66988300 | 0.15686200  | -1.77564000 |
| H | -0.05730800 | 1.04895200  | -3.17023800 |
| C | -1.39333100 | 3.37724600  | -2.85764000 |
| H | -2.24314300 | 4.05894600  | -2.78609300 |
| H | -1.18912100 | 3.20421300  | -3.91691000 |
| H | -0.52648800 | 3.85761700  | -2.41660800 |
| C | 0.24730600  | 4.47217000  | 0.63517100  |
| H | -0.41167200 | 5.32442200  | 0.81393400  |
| H | 0.55664400  | 4.04536900  | 1.59189800  |
| H | -5.71154800 | -0.59653400 | -1.54051400 |
| H | -6.84131100 | -0.20060100 | 0.56990600  |
| C | 3.12714300  | 0.97260800  | -0.76022300 |
| C | 3.21828100  | 2.33969600  | -0.48695900 |
| C | 2.96745700  | 0.55693900  | -2.07859800 |
| C | 3.12803800  | 3.27501600  | -1.50434300 |
| H | 3.36733900  | 2.67941100  | 0.52809900  |
| C | 2.87898500  | 1.48208300  | -3.11152300 |
| H | 2.89909900  | -0.49268600 | -2.31955500 |
| C | 2.95413400  | 2.82354500  | -2.80099000 |
| H | 3.19700900  | 4.33476900  | -1.30436200 |
| H | 2.74312600  | 1.16705100  | -4.13621900 |
| C | 2.49191300  | 0.21945600  | 1.62078800  |
| C | 2.85107800  | -0.43134300 | 2.80220600  |
| C | 1.33401700  | 0.99166900  | 1.59668400  |
| C | 2.07639600  | -0.31007000 | 3.94479300  |
| H | 3.74367300  | -1.04040600 | 2.83769200  |
| C | 0.54030300  | 1.11582700  | 2.73081200  |
| H | 1.02271000  | 1.49021800  | 0.69137600  |
| C | 0.93043000  | 0.46379500  | 3.88216700  |
| H | 2.34793100  | -0.80687600 | 4.86549400  |
| F | 2.85616400  | 3.73280300  | -3.79754800 |
| F | 0.16238800  | 0.57862900  | 4.99023900  |
| H | -0.37105800 | 1.69588100  | 2.71160700  |
| H | 1.12766700  | 4.80182100  | 0.09127300  |

#### FP-TS-II-C

|    |             |             |             |
|----|-------------|-------------|-------------|
| Cl | -1.71631500 | -1.07287100 | 1.20273600  |
| O  | 4.76977900  | -0.64685700 | 0.75436000  |
| N  | 8.08040300  | -0.53295300 | 1.72513000  |
| N  | 7.99822400  | -2.94128800 | -1.91767600 |
| N  | 4.58953200  | -3.30738900 | -3.18805200 |
| C  | 7.45494800  | -0.99663300 | 0.86775600  |
| C  | 7.39921000  | -2.32485100 | -1.14201700 |
| C  | 4.52097300  | -2.62995900 | -2.25160400 |
| C  | 6.70496600  | -1.56620800 | -0.18097900 |
| C  | 5.31897300  | -1.36848000 | -0.23639300 |
| C  | 4.33977800  | -1.80366000 | -1.13498900 |
| C  | 3.05674300  | -1.34759500 | -0.69229100 |
| C  | 3.34459700  | -0.37068600 | 0.44627900  |
| C  | 1.85176300  | -1.72589300 | -1.20746700 |
| H  | 1.89904700  | -2.39608300 | -2.05736800 |
| C  | 0.57246000  | -1.41736000 | -0.67693100 |
| H  | 0.54566100  | -0.84114900 | 0.23312500  |
| C  | -0.62515900 | -1.85166100 | -1.16946100 |
| C  | -0.74454000 | -2.60868600 | -2.47052400 |
| H  | -0.71047000 | -3.68598700 | -2.27023900 |
| H  | 0.10256100  | -2.38037700 | -3.11494700 |
| C  | -2.04575800 | -2.27172000 | -3.18940900 |
| H  | -2.03250200 | -1.21601200 | -3.46927300 |
| C  | -3.24993200 | -2.55942300 | -2.30439500 |
| H  | -3.43571700 | -3.63715300 | -2.26135000 |
| H  | -4.15570900 | -2.13068600 | -2.74090100 |
| C  | -3.08645600 | -2.04702000 | -0.89410500 |
| C  | -1.85452200 | -1.68276000 | -0.43697600 |
| C  | -4.26972800 | -2.04151700 | -0.05719800 |
| H  | -4.11212800 | -1.96072700 | 1.01002200  |
| H  | -2.12447200 | -2.84091900 | -4.11641900 |
| O  | -5.19749700 | -2.94376700 | -0.43867200 |
| C  | -6.16526500 | -3.34324500 | 0.55150100  |



|   |             |             |             |
|---|-------------|-------------|-------------|
| H | -5.63453200 | -3.60392700 | 1.47013900  |
| H | -6.82741900 | -2.50081300 | 0.76413300  |
| C | -6.94031400 | -4.51564000 | 0.00253700  |
| H | -7.45675900 | -4.24115000 | -0.91781400 |
| H | -6.27801300 | -5.35691500 | -0.20286500 |
| H | -7.68533700 | -4.83235600 | 0.73336500  |
| O | -0.15786900 | 3.32087200  | 0.62826900  |
| N | -3.89916100 | 1.15007000  | -1.44906900 |
| C | -5.16578000 | 0.67655700  | 1.07274600  |
| C | -5.33081900 | -0.23767900 | -0.13058300 |
| C | -4.87219500 | 0.26586200  | -1.34615600 |
| C | -3.40857000 | 1.47156100  | -2.80209400 |
| H | -4.26939700 | 1.48099600  | -3.46663200 |
| H | -2.74343100 | 0.67197500  | -3.12348100 |
| C | -2.69759900 | 2.79432700  | -2.80444200 |
| H | -2.31941900 | 2.98279700  | -3.80971500 |
| H | -3.40612100 | 3.59195100  | -2.56737500 |
| C | -1.53262600 | 2.83540800  | -1.80603400 |
| C | -2.06700200 | 2.42427100  | -0.43138600 |
| C | -1.39308000 | 2.77017400  | 0.75710300  |
| C | -1.96648200 | 2.53415500  | 2.00006900  |
| H | -1.46410200 | 2.84068100  | 2.90414200  |
| C | -3.18451000 | 1.88127600  | 2.08604400  |
| H | -3.60714200 | 1.70579100  | 3.06393800  |
| C | -3.83430400 | 1.40970100  | 0.96070200  |
| C | -3.25544800 | 1.68472500  | -0.29289600 |
| C | -5.31021100 | -0.09454300 | 2.39159800  |
| H | -5.43232400 | 0.58891900  | 3.23061700  |
| H | -6.20077600 | -0.72274800 | 2.35747400  |
| H | -4.44616500 | -0.72341300 | 2.60002500  |
| C | -6.30537400 | 1.72581400  | 1.00591900  |
| H | -6.21917700 | 2.41811700  | 1.84442100  |
| H | -6.25838700 | 2.29971100  | 0.07976300  |
| H | -7.27926300 | 1.23490500  | 1.05860100  |
| C | -0.41264400 | 1.87373500  | -2.23107600 |
| H | 0.39611900  | 1.90843800  | -1.50757600 |
| H | -0.75470000 | 0.84163400  | -2.28515000 |
| H | -0.01470300 | 2.16045700  | -3.20716600 |
| C | -1.00643500 | 4.28455600  | -1.84315900 |
| H | -1.70804300 | 4.96757400  | -1.36083300 |
| H | -0.90458000 | 4.58886000  | -2.88678100 |
| H | -0.04052400 | 4.38664800  | -1.36256400 |
| C | 0.43255800  | 3.96486400  | 1.75235700  |
| H | -0.24023700 | 4.71580200  | 2.17107300  |
| H | 0.70707100  | 3.24856600  | 2.52937200  |
| H | -5.24706900 | -0.12194300 | -2.28360100 |
| H | -6.29037900 | -0.73348400 | -0.19272300 |
| C | 3.33249600  | 1.08664900  | 0.00014000  |
| C | 3.80222000  | 2.05633400  | 0.89085300  |
| C | 2.95923900  | 1.47354900  | -1.28020900 |
| C | 3.88208800  | 3.38770700  | 0.51829600  |
| H | 4.11433400  | 1.76755800  | 1.88467400  |
| C | 3.03155600  | 2.80701800  | -1.67269600 |
| H | 2.59967200  | 0.73784300  | -1.98371600 |
| C | 3.48799600  | 3.73601500  | -0.76289200 |
| H | 4.24173600  | 4.14458500  | 1.20117800  |
| H | 2.73185800  | 3.11742100  | -2.66344500 |
| C | 2.56315400  | -0.64623200 | 1.71761100  |
| C | 2.77761400  | -1.84856800 | 2.39150700  |
| C | 1.59931800  | 0.23520600  | 2.19776300  |
| C | 2.05361600  | -2.16488000 | 3.53094100  |
| H | 3.51774600  | -2.54663600 | 2.02558800  |
| C | 0.86098400  | -0.06623200 | 3.33610700  |
| H | 1.39745700  | 1.15514400  | 1.67032200  |
| C | 1.10694900  | -1.26096200 | 3.98055100  |
| H | 2.21422500  | -3.09238600 | 4.06243400  |
| F | 3.55426500  | 5.03832600  | -1.13166800 |
| F | 0.39033100  | -1.56564300 | 5.08954600  |
| H | 0.09989800  | 0.60480600  | 3.70759900  |
| H | 1.33263300  | 4.44304100  | 1.37843800  |

## FP-INT-II-D

|    |             |             |             |
|----|-------------|-------------|-------------|
| Cl | -1.68399900 | -1.20159100 | 1.24083200  |
| O  | 4.79972600  | -0.66602200 | 0.68214700  |
| N  | 8.12677800  | -0.52955000 | 1.58423400  |
| N  | 8.02089800  | -2.70276600 | -2.20200700 |
| N  | 4.58458600  | -3.02334900 | -3.44764200 |
| C  | 7.49292900  | -0.95244800 | 0.71120100  |
| C  | 7.42536300  | -2.15034100 | -1.37617100 |
| C  | 4.52572600  | -2.42411800 | -2.45786400 |
| C  | 6.73484700  | -1.47157400 | -0.35612300 |
| C  | 5.33995600  | -1.30410500 | -0.37263700 |
| C  | 4.35394300  | -1.69364900 | -1.27667700 |
| C  | 3.06412600  | -1.30040500 | -0.76980700 |
| C  | 3.36470500  | -0.39537900 | 0.42334500  |
| C  | 1.85820100  | -1.66414800 | -1.27585600 |
| H  | 1.89239800  | -2.27809800 | -2.16812400 |
| C  | 0.57737600  | -1.39608900 | -0.70228300 |
| H  | 0.56799800  | -0.89673500 | 0.25257900  |
| C  | -0.62178700 | -1.77795900 | -1.21069900 |
| C  | -0.77190300 | -2.42594600 | -2.56529900 |
| H  | -0.79982500 | -3.51579900 | -2.44878300 |
| H  | 0.08902600  | -2.19598900 | -3.19016500 |
| C  | -2.05242200 | -1.96774500 | -3.25556800 |
| H  | -1.99096300 | -0.89298300 | -3.44356100 |
| C  | -3.26648900 | -2.27794000 | -2.39301600 |
| H  | -3.46630500 | -3.35360800 | -2.40589500 |
| H  | -4.16470300 | -1.82512900 | -2.81889200 |
| C  | -3.09729600 | -1.85347200 | -0.95310900 |
| C  | -1.86258500 | -1.62814100 | -0.46202200 |
| C  | -4.35103000 | -1.80187600 | -0.11862800 |
| H  | -4.08957700 | -1.91549100 | 0.93081800  |
| H  | -2.15378500 | -2.45293300 | -4.22726800 |
| O  | -5.15892600 | -2.88869200 | -0.52656700 |
| C  | -6.09054700 | -3.35023100 | 0.45003600  |
| H  | -5.55915100 | -3.55871100 | 1.38506500  |
| H  | -6.83817700 | -2.57605300 | 0.65718900  |
| C  | -6.76146700 | -4.59479300 | -0.08454800 |
| H  | -7.29216600 | -4.37894300 | -1.01287400 |
| H  | -6.02646200 | -5.37725300 | -0.27689000 |
| H  | -7.48213500 | -4.96873500 | 0.64410200  |
| O  | -0.18706400 | 3.20545700  | 0.84672700  |
| N  | -3.93657000 | 1.23876600  | -1.42418300 |
| C  | -5.17921200 | 0.51345800  | 1.00315000  |
| C  | -5.20462900 | -0.44110100 | -0.21536200 |
| C  | -4.82500500 | 0.30437800  | -1.42194900 |
| C  | -3.55155800 | 1.81277700  | -2.74370700 |
| H  | -4.47091100 | 1.97388800  | -3.30047300 |
| H  | -2.96759900 | 1.05200800  | -3.25633000 |
| C  | -2.76614000 | 3.08038600  | -2.57970400 |
| H  | -2.42375000 | 3.38897700  | -3.56777100 |
| H  | -3.41162600 | 3.87356400  | -2.19644400 |
| C  | -1.55830900 | 2.91678900  | -1.64488100 |
| C  | -2.08759300 | 2.40864400  | -0.30276700 |
| C  | -1.42373900 | 2.65729800  | 0.91633200  |
| C  | -2.01876300 | 2.33156900  | 2.12908300  |
| H  | -1.52633000 | 2.56861800  | 3.05911400  |
| C  | -3.23530000 | 1.67044700  | 2.15836200  |
| H  | -3.66334700 | 1.41754400  | 3.11612800  |
| C  | -3.86707300 | 1.28036000  | 0.99373300  |
| C  | -3.27579900 | 1.66424800  | -0.22159800 |
| C  | -5.41162200 | -0.24923200 | 2.31088700  |
| H  | -5.60285300 | 0.44731100  | 3.12601500  |
| H  | -6.29203100 | -0.88475100 | 2.21859000  |
| H  | -4.56283400 | -0.86805300 | 2.59525800  |
| C  | -6.33726000 | 1.52455900  | 0.83579400  |
| H  | -6.33359500 | 2.22626700  | 1.66919700  |
| H  | -6.25357500 | 2.10049200  | -0.08667000 |
| H  | -7.29591200 | 1.00261100  | 0.82632600  |
| C  | -0.54444500 | 1.90754200  | -2.20564100 |
| H  | 0.29016200  | 1.80871800  | -1.51768400 |

|   |             |             |             |
|---|-------------|-------------|-------------|
| H | -0.97265200 | 0.91487700  | -2.33306700 |
| H | -0.16047400 | 2.24832400  | -3.16936200 |
| C | -0.90440300 | 4.31025800  | -1.56879400 |
| H | -1.51756500 | 5.00252200  | -0.98960000 |
| H | -0.81886200 | 4.70395800  | -2.58327700 |
| H | 0.08586600  | 4.27829000  | -1.13105100 |
| C | 0.38563900  | 3.77468900  | 2.02111900  |
| H | -0.29192400 | 4.50253100  | 2.47128700  |
| H | 0.64015700  | 3.00939300  | 2.75654200  |
| H | -5.25931900 | 0.06189500  | -2.38243600 |
| H | -6.22973700 | -0.78119000 | -0.35640700 |
| C | 3.31423300  | 1.08787000  | 0.07381800  |
| C | 3.81295500  | 2.00717100  | 1.00122500  |
| C | 2.86697300  | 1.55021200  | -1.15677400 |
| C | 3.84945500  | 3.36177500  | 0.71411800  |
| H | 4.18179600  | 1.66070900  | 1.95645900  |
| C | 2.89362200  | 2.90772700  | -1.46317200 |
| H | 2.48889000  | 0.85209300  | -1.88825800 |
| C | 3.38156100  | 3.78477300  | -0.51874600 |
| H | 4.23145400  | 4.07997600  | 1.42609400  |
| H | 2.53887400  | 3.27568800  | -2.41530000 |
| C | 2.61788400  | -0.76579500 | 1.69150100  |
| C | 2.85035800  | -2.01501100 | 2.26712600  |
| C | 1.66919400  | 0.07535800  | 2.26416500  |
| C | 2.15848800  | -2.41716300 | 3.39939400  |
| H | 3.57870400  | -2.68252000 | 1.82774900  |
| C | 0.96282000  | -0.31125900 | 3.39718200  |
| H | 1.45545300  | 1.03220400  | 1.81299700  |
| C | 1.22550400  | -1.55089500 | 3.94231800  |
| H | 2.33257000  | -3.38200400 | 3.85476700  |
| F | 3.40502500  | 5.10988600  | -0.80350700 |
| F | 0.54011700  | -1.93934800 | 5.04530500  |
| H | 0.21475800  | 0.32967400  | 3.84147600  |
| H | 1.29513300  | 4.26857400  | 1.69430000  |

#### FP-TS-II-D

|    |             |             |             |
|----|-------------|-------------|-------------|
| CI | 0.39388700  | -1.37567200 | 1.70416100  |
| O  | 6.10904100  | 1.14029300  | -0.13205300 |
| N  | 8.99165000  | 3.03152600  | -0.17377800 |
| N  | 9.48757900  | 0.06750100  | -3.33764400 |
| N  | 6.51366000  | -2.08131600 | -3.61474300 |
| C  | 8.54976800  | 2.13039400  | -0.75296400 |
| C  | 8.81384000  | 0.49217200  | -2.49641900 |
| C  | 6.32098700  | -1.35144500 | -2.73601300 |
| C  | 8.02529400  | 1.03515300  | -1.46624700 |
| C  | 6.75737500  | 0.52590800  | -1.13763300 |
| C  | 5.99508300  | -0.51558000 | -1.66175800 |
| C  | 4.75411700  | -0.60883700 | -0.94119200 |
| C  | 4.82198600  | 0.46419500  | 0.14545500  |
| C  | 3.71352900  | -1.43730100 | -1.20622900 |
| H  | 3.82357600  | -2.09687100 | -2.05810300 |
| C  | 2.50607600  | -1.49114200 | -0.44438800 |
| H  | 2.49076700  | -0.91652400 | 0.46724900  |
| C  | 1.37879900  | -2.18338600 | -0.73777400 |
| C  | 1.20575700  | -3.01579000 | -1.98333500 |
| H  | 1.31367000  | -4.07712300 | -1.73077400 |
| H  | 1.98249800  | -2.78077800 | -2.70799800 |
| C  | -0.17487700 | -2.78512800 | -2.59434900 |
| H  | -0.26705500 | -1.73215300 | -2.87528800 |
| C  | -1.27085000 | -3.14759100 | -1.60013000 |
| H  | -1.37875400 | -4.23555000 | -1.54217400 |
| H  | -2.23795500 | -2.78049400 | -1.95020300 |
| C  | -1.01618100 | -2.60111300 | -0.21743200 |
| C  | 0.20384400  | -2.14463300 | 0.11787800  |
| C  | -2.20839900 | -2.53562300 | 0.71089200  |
| H  | -1.85786200 | -2.62523700 | 1.74251700  |
| H  | -0.29081600 | -3.37238200 | -3.50652900 |
| O  | -3.09169700 | -3.62565900 | 0.44708700  |
| C  | -2.65553900 | -4.85690000 | 1.01568200  |

|   |             |             |             |
|---|-------------|-------------|-------------|
| H | -1.64334100 | -5.09385600 | 0.66907900  |
| H | -2.61238500 | -4.75433600 | 2.10719000  |
| C | -3.62796000 | -5.94194300 | 0.61290600  |
| H | -4.63675200 | -5.70122300 | 0.95169600  |
| H | -3.64485700 | -6.06426300 | -0.47130500 |
| H | -3.33284500 | -6.89267900 | 1.05896800  |
| O | -6.73012200 | 3.85229700  | 0.19408100  |
| N | -2.81331300 | 1.10003200  | 0.03768000  |
| C | -3.92291500 | -0.84023000 | 1.77766300  |
| C | -3.01737900 | -1.23607600 | 0.59083600  |
| C | -2.36247700 | -0.14230300 | 0.01635500  |
| C | -2.12243000 | 2.09812400  | -0.79748200 |
| H | -1.05567600 | 1.89771800  | -0.73176700 |
| H | -2.43201800 | 1.95620500  | -1.83454200 |
| C | -2.45622200 | 3.48015700  | -0.31001900 |
| H | -1.91616400 | 4.21095000  | -0.91061300 |
| H | -2.10600000 | 3.58716000  | 0.71966200  |
| C | -3.96187900 | 3.77729600  | -0.37412900 |
| C | -4.72497100 | 2.61242200  | 0.26425200  |
| C | -6.09378500 | 2.72308200  | 0.59648900  |
| C | -6.74606200 | 1.70841500  | 1.28428400  |
| H | -7.78910400 | 1.80005300  | 1.54258300  |
| C | -6.05254500 | 0.56670400  | 1.66266600  |
| H | -6.57809700 | -0.18829500 | 2.22655300  |
| C | -4.72899600 | 0.37563900  | 1.31678400  |
| C | -4.10116600 | 1.39222400  | 0.56831200  |
| C | -4.82490500 | -1.99413200 | 2.22115900  |
| H | -5.42731500 | -1.69686100 | 3.07922000  |
| H | -4.22222300 | -2.84482800 | 2.52911200  |
| H | -5.49045600 | -2.32391100 | 1.42471100  |
| C | -3.05971400 | -0.40893400 | 2.98476400  |
| H | -3.70718200 | -0.08853400 | 3.80234600  |
| H | -2.39920100 | 0.41933500  | 2.72805500  |
| H | -2.44440900 | -1.23507200 | 3.34220700  |
| C | -4.40224300 | 3.97741400  | -1.83532400 |
| H | -5.46419100 | 4.20835100  | -1.88657500 |
| H | -4.22362300 | 3.08475400  | -2.43578500 |
| H | -3.84639400 | 4.80523400  | -2.28056900 |
| C | -4.16248300 | 5.08863300  | 0.41203800  |
| H | -3.96483700 | 4.93404100  | 1.47429900  |
| H | -3.45151400 | 5.83040300  | 0.04237500  |
| H | -5.16486300 | 5.48720600  | 0.30133000  |
| C | -8.10187000 | 4.02997900  | 0.52903500  |
| H | -8.24705500 | 4.03318100  | 1.61136200  |
| H | -8.72272700 | 3.25240400  | 0.07875100  |
| H | -1.46080800 | -0.28276000 | -0.56365900 |
| H | -3.92658600 | -1.48585700 | -0.41886800 |
| C | -5.60502700 | -0.67945100 | -1.81670100 |
| C | -6.62008900 | -0.85056200 | -2.74142700 |
| C | -6.93584000 | -2.13999400 | -3.15313300 |
| C | -6.22773300 | -3.21407400 | -2.62819100 |
| C | -5.22340300 | -2.96504500 | -1.70790300 |
| N | -4.93069000 | -1.72066700 | -1.32356300 |
| H | -7.72567700 | -2.30523400 | -3.87324300 |
| H | -5.32570400 | 0.29945000  | -1.45127400 |
| H | -7.15001500 | 0.00923000  | -3.12482600 |
| H | -6.44736300 | -4.22986900 | -2.92348200 |
| H | -4.63248300 | -3.74600600 | -1.25183600 |
| C | 3.72991300  | 1.51106000  | -0.04794600 |
| C | 2.65786800  | 1.63938300  | 0.82911400  |
| C | 3.77229800  | 2.32146200  | -1.18345500 |
| C | 1.64028200  | 2.55676200  | 0.58748900  |
| H | 2.59834700  | 1.02120200  | 1.71211300  |
| C | 2.77186800  | 3.24688700  | -1.43868800 |
| H | 4.59411600  | 2.23327800  | -1.88003300 |
| C | 1.72194800  | 3.34425000  | -0.54268100 |
| H | 0.80566300  | 2.66018700  | 1.26662600  |
| H | 2.80052100  | 3.88234400  | -2.31273300 |
| C | 4.94596700  | -0.05826400 | 1.56768100  |
| C | 5.15633000  | 0.86144900  | 2.59831500  |
| C | 4.91642600  | -1.41450800 | 1.87124100  |

|   |             |             |             |
|---|-------------|-------------|-------------|
| C | 5.31645300  | 0.44115300  | 3.90904200  |
| H | 5.19730200  | 1.91854300  | 2.37524300  |
| C | 5.06962400  | -1.85593800 | 3.18192700  |
| H | 4.76966100  | -2.14046100 | 1.08598300  |
| C | 5.26370200  | -0.91671900 | 4.17362200  |
| H | 5.47919900  | 1.14566500  | 4.71263600  |
| H | 5.04240500  | -2.90840900 | 3.42705000  |
| F | 0.73929100  | 4.24615900  | -0.78655200 |
| F | 5.41230200  | -1.33613100 | 5.45371200  |
| H | -8.38097100 | 4.99782500  | 0.12183300  |

**FP-INT-II-E**

|    |             |             |             |
|----|-------------|-------------|-------------|
| Cl | 0.70206600  | 1.47711600  | -1.08200800 |
| O  | 6.62185900  | -1.11297100 | -0.34146600 |
| N  | 9.65858900  | -2.58889200 | -1.02803100 |
| N  | 9.76660300  | -1.60808600 | 3.22294600  |
| N  | 6.59078800  | -0.09521600 | 4.30930300  |
| C  | 9.11638600  | -2.13270100 | -0.11105100 |
| C  | 9.16512200  | -1.58994900 | 2.23303300  |
| C  | 6.50086200  | -0.28375100 | 3.16968200  |
| C  | 8.46809700  | -1.58333600 | 1.01189500  |
| C  | 7.17162100  | -1.05488600 | 0.88453600  |
| C  | 6.29647200  | -0.47242500 | 1.79803900  |
| C  | 5.07689100  | -0.10948700 | 1.12569500  |
| C  | 5.30051900  | -0.44512500 | -0.34823200 |
| C  | 3.95013300  | 0.39069400  | 1.69123400  |
| H  | 3.97480800  | 0.53785200  | 2.76395000  |
| C  | 2.76220000  | 0.73921500  | 0.97757300  |
| H  | 2.80090300  | 0.63972900  | -0.09477000 |
| C  | 1.59563700  | 1.18890900  | 1.50259400  |
| C  | 1.37836200  | 1.37919400  | 2.98451700  |
| H  | 1.56881500  | 2.42666100  | 3.24701000  |
| H  | 2.08969000  | 0.77937500  | 3.54893300  |
| C  | -0.04770200 | 1.01755600  | 3.38729800  |
| H  | -0.22114200 | -0.04280800 | 3.18227600  |
| C  | -1.04786700 | 1.85888400  | 2.60750700  |
| H  | -1.02952500 | 2.88924600  | 2.97847500  |
| H  | -2.06421600 | 1.50874800  | 2.78695200  |
| C  | -0.77353700 | 1.85430900  | 1.12350800  |
| C  | 0.45103000  | 1.52679000  | 0.67109800  |
| C  | -1.91494700 | 2.19506600  | 0.19031400  |
| H  | -1.50873000 | 2.71675200  | -0.67444800 |
| H  | -0.18871500 | 1.16696900  | 4.45881500  |
| O  | -2.84469800 | 3.10421200  | 0.84419500  |
| C  | -2.38023600 | 4.45402000  | 1.01308000  |
| H  | -2.93923900 | 4.84682900  | 1.86256100  |
| H  | -1.32302400 | 4.43659900  | 1.28820800  |
| C  | -2.60138900 | 5.31099900  | -0.21800900 |
| H  | -2.02542600 | 4.95057500  | -1.07033200 |
| H  | -3.65601900 | 5.32947100  | -0.49404800 |
| H  | -2.28191500 | 6.33368900  | -0.00845000 |
| O  | -8.15405500 | -2.16083200 | -0.98892300 |
| N  | -3.61769300 | -1.16508500 | 0.18059000  |
| C  | -3.47233800 | 1.01316700  | -1.60335100 |
| C  | -2.71720500 | 1.01023500  | -0.27539600 |
| C  | -2.77216000 | -0.10923200 | 0.45595100  |
| C  | -3.60532900 | -2.28433500 | 1.11659800  |
| H  | -2.56659800 | -2.52178800 | 1.34136900  |
| H  | -4.08976600 | -1.99740600 | 2.05702100  |
| C  | -4.30251800 | -3.46473300 | 0.49037500  |
| H  | -4.25403100 | -4.32250700 | 1.16286500  |
| H  | -3.76927000 | -3.73726600 | -0.42400500 |
| C  | -5.77429600 | -3.16814900 | 0.15652800  |
| C  | -5.86795800 | -1.79939900 | -0.53048100 |
| C  | -7.05454300 | -1.37319500 | -1.15900500 |
| C  | -7.10035800 | -0.19532500 | -1.89620400 |
| H  | -8.00951400 | 0.11981600  | -2.38273200 |
| C  | -5.95491800 | 0.57773700  | -2.02453600 |
| H  | -6.00549100 | 1.46673600  | -2.63537300 |

|   |              |             |             |
|---|--------------|-------------|-------------|
| C | -4.77362800  | 0.24089000  | -1.38897000 |
| C | -4.76210500  | -0.92758700 | -0.59012800 |
| C | -3.71862300  | 2.42066100  | -2.15179700 |
| H | -4.20231600  | 2.37277700  | -3.12639600 |
| H | -2.77370200  | 2.94047500  | -2.29877100 |
| H | -4.33519600  | 3.02545000  | -1.48928100 |
| C | -2.61849700  | 0.24488600  | -2.64335600 |
| H | -3.14593300  | 0.19572800  | -3.59839300 |
| H | -2.41925200  | -0.77180600 | -2.30515100 |
| H | -1.66237700  | 0.74786500  | -2.79403800 |
| C | -6.61028400  | -3.20651000 | 1.44783700  |
| H | -7.64730000  | -2.94508200 | 1.24862600  |
| H | -6.22235300  | -2.51324400 | 2.19330600  |
| H | -6.58253900  | -4.21084000 | 1.87692300  |
| C | -6.23451300  | -4.29933400 | -0.78480300 |
| H | -5.71851700  | -4.23174200 | -1.74439700 |
| H | -5.98257200  | -5.26193000 | -0.33397400 |
| H | -7.30422000  | -4.27329800 | -0.96561900 |
| C | -9.38000800  | -1.76957000 | -1.59102700 |
| H | -9.29384700  | -1.72611500 | -2.67916000 |
| H | -9.71486100  | -0.80003500 | -1.21445900 |
| H | -2.16038800  | -0.25464200 | 1.33408300  |
| H | -4.31543500  | 2.46109100  | 1.38597100  |
| C | -6.26424600  | 2.08540600  | 0.85397100  |
| C | -7.39172400  | 1.32648800  | 1.08982700  |
| C | -7.37404800  | 0.40487400  | 2.12727400  |
| C | -6.23734000  | 0.27579900  | 2.91999100  |
| C | -5.14004400  | 1.05823800  | 2.64279800  |
| N | -5.18216000  | 1.93350200  | 1.62777700  |
| H | -8.23993900  | -0.21286100 | 2.31865400  |
| H | -6.19144200  | 2.81147800  | 0.06110000  |
| H | -8.25678100  | 1.44769600  | 0.45787800  |
| H | -6.19759100  | -0.42704900 | 3.73775100  |
| H | -4.21721900  | 1.00619800  | 3.19780900  |
| C | 4.29717100   | -1.47611300 | -0.84987100 |
| C | 3.34362000   | -1.17899100 | -1.81756100 |
| C | 4.29539300   | -2.74460700 | -0.26770900 |
| C | 2.39715400   | -2.12251200 | -2.20304300 |
| H | 3.31855300   | -0.20184200 | -2.27597400 |
| C | 3.36603200   | -3.70187100 | -0.64433000 |
| H | 5.02574800   | -2.99135500 | 0.49042500  |
| C | 2.43021600   | -3.36645300 | -1.60763900 |
| H | 1.64822500   | -1.89421300 | -2.94820800 |
| H | 3.36016400   | -4.68799100 | -0.20138500 |
| C | 5.46710000   | 0.76000700  | -1.26166700 |
| C | 5.89780500   | 0.54300500  | -2.57329000 |
| C | 5.24915900   | 2.06368900  | -0.83202200 |
| C | 6.09311600   | 1.60185600  | -3.44555400 |
| H | 6.08487200   | -0.46479200 | -2.91708200 |
| C | 5.43450300   | 3.13998900  | -1.69478800 |
| H | 4.93050100   | 2.25210300  | 0.18169400  |
| C | 5.85037300   | 2.88471300  | -2.98496900 |
| H | 6.42639500   | 1.44308300  | -4.46159800 |
| H | 5.26358100   | 4.15656200  | -1.36926800 |
| F | 1.51332100   | -4.29480400 | -1.97641800 |
| F | 6.03310900   | 3.92599800  | -3.83334100 |
| H | -10.10223900 | -2.53370100 | -1.31569900 |

#### FP-TS-II-E

|    |              |             |             |
|----|--------------|-------------|-------------|
| Cl | -0.87226200  | 1.02200700  | 1.24602600  |
| O  | -7.06360000  | -0.74842800 | 0.30499600  |
| N  | -10.38594200 | -1.50607800 | 0.84613100  |
| N  | -9.85135000  | -1.57972500 | -3.48523400 |
| N  | -6.36106400  | -0.91768700 | -4.40061700 |
| C  | -9.67152600  | -1.38208200 | -0.05716400 |
| C  | -9.36590000  | -1.42155200 | -2.44586300 |
| C  | -6.42576500  | -0.83167100 | -3.24767600 |
| C  | -8.81364300  | -1.23406400 | -1.16524800 |
| C  | -7.46465900  | -0.90511000 | -0.96695700 |

|   |             |             |             |
|---|-------------|-------------|-------------|
| C | -6.40306100 | -0.70768800 | -1.85276800 |
| C | -5.22093200 | -0.38050300 | -1.11342300 |
| C | -5.64478900 | -0.32628600 | 0.35316100  |
| C | -3.97152300 | -0.19055200 | -1.61797700 |
| H | -3.86763300 | -0.29330300 | -2.69074600 |
| C | -2.82480400 | 0.15212400  | -0.84968800 |
| H | -2.97696700 | 0.29703200  | 0.20714100  |
| C | -1.56066900 | 0.33961300  | -1.31921800 |
| C | -1.20992800 | 0.15992300  | -2.77914300 |
| H | -1.35028400 | 1.11119000  | -3.30559300 |
| H | -1.89276000 | -0.55373400 | -3.23705600 |
| C | 0.22902000  | -0.30561300 | -2.96796400 |
| H | 0.35114800  | -1.30224500 | -2.53460200 |
| C | 1.18333900  | 0.66495800  | -2.29060000 |
| H | 1.16304300  | 1.62067300  | -2.82629700 |
| H | 2.20824500  | 0.31142200  | -2.36240500 |
| C | 0.81572000  | 0.90476200  | -0.84308400 |
| C | -0.47509600 | 0.74770100  | -0.45535000 |
| C | 1.84484100  | 1.34359300  | 0.11282600  |
| H | 1.43272300  | 1.93243300  | 0.91806300  |
| H | 0.46385800  | -0.38118700 | -4.03040600 |
| O | 2.63409700  | 2.73226300  | -0.67937400 |
| C | 1.82037700  | 3.82179000  | -1.15858000 |
| H | 2.32235500  | 4.22649200  | -2.03845600 |
| H | 0.85353700  | 3.42349200  | -1.47184800 |
| C | 1.65385000  | 4.86570100  | -0.07727100 |
| H | 1.15605700  | 4.44603000  | 0.79770200  |
| H | 2.62059300  | 5.26485200  | 0.22989100  |
| H | 1.04070100  | 5.68690200  | -0.45219300 |
| O | 9.05201700  | -1.13407800 | 0.87370300  |
| N | 4.33829600  | -1.38721000 | 0.06995300  |
| C | 3.77733100  | 0.80663400  | 1.76585900  |
| C | 2.95177900  | 0.51305900  | 0.51314900  |
| C | 3.23812800  | -0.63378200 | -0.15355600 |
| C | 4.53854800  | -2.54884800 | -0.79983800 |
| H | 3.58095900  | -3.05531700 | -0.90440900 |
| H | 4.84887500  | -2.20761800 | -1.79202000 |
| C | 5.56935300  | -3.46072400 | -0.19022700 |
| H | 5.68904400  | -4.34635300 | -0.81560500 |
| H | 5.20771200  | -3.79704800 | 0.78493100  |
| C | 6.93270200  | -2.77199000 | -0.02213100 |
| C | 6.72084800  | -1.39501800 | 0.61817000  |
| C | 7.80523700  | -0.64149900 | 1.11097200  |
| C | 7.60236600  | 0.55820600  | 1.78250200  |
| H | 8.43553200  | 1.12587100  | 2.16508300  |
| C | 6.31162500  | 1.02550300  | 1.98450900  |
| H | 6.18167500  | 1.94071800  | 2.54189600  |
| C | 5.21040700  | 0.35679600  | 1.48277600  |
| C | 5.44125100  | -0.82581600 | 0.74747600  |
| C | 3.71033300  | 2.27231700  | 2.20531100  |
| H | 4.24564900  | 2.41066800  | 3.14353200  |
| H | 2.67956300  | 2.57077600  | 2.39186900  |
| H | 4.12736100  | 2.94795800  | 1.46135100  |
| C | 3.21155900  | -0.06089900 | 2.91770800  |
| H | 3.79509800  | 0.09317800  | 3.82741000  |
| H | 3.24543800  | -1.11999200 | 2.66202400  |
| H | 2.17261600  | 0.20978000  | 3.11763200  |
| C | 7.61928600  | -2.64055100 | -1.39326900 |
| H | 8.57721200  | -2.13351500 | -1.29919300 |
| H | 7.00639500  | -2.07412000 | -2.09395400 |
| H | 7.79266400  | -3.63227500 | -1.81738300 |
| C | 7.76601700  | -3.69832500 | 0.88568100  |
| H | 7.34868000  | -3.72349900 | 1.89406300  |
| H | 7.73220200  | -4.71271400 | 0.48197200  |
| H | 8.80340200  | -3.38755000 | 0.94911700  |
| C | 10.18066700 | -0.40741800 | 1.34133900  |
| H | 10.17032700 | -0.31342800 | 2.42957100  |
| H | 10.22635600 | 0.58678500  | 0.89060200  |
| H | 2.58831800  | -1.02211900 | -0.92151400 |
| H | 3.39212200  | 2.41435000  | -1.34700300 |
| C | 5.75901900  | 2.05711800  | -1.32942300 |

|   |             |             |             |
|---|-------------|-------------|-------------|
| C | 6.96146800  | 1.47834100  | -1.70108900 |
| C | 7.00870400  | 0.74659500  | -2.87886300 |
| C | 5.85625500  | 0.62939100  | -3.64656800 |
| C | 4.69594300  | 1.24235000  | -3.20288400 |
| N | 4.64720900  | 1.93789800  | -2.06203600 |
| H | 7.92776900  | 0.27141700  | -3.19326100 |
| H | 5.67217000  | 2.62258200  | -0.41272100 |
| H | 7.82914300  | 1.58686300  | -1.06788900 |
| H | 5.85139900  | 0.07079500  | -4.57150700 |
| H | 3.77722200  | 1.17542300  | -3.76968400 |
| C | -4.90855700 | -1.36962100 | 1.18440400  |
| C | -3.98968000 | -1.02212400 | 2.16890000  |
| C | -5.11644600 | -2.72026000 | 0.90083200  |
| C | -3.28292200 | -1.99771700 | 2.86372500  |
| H | -3.80680500 | 0.01608300  | 2.40199400  |
| C | -4.42805200 | -3.70789800 | 1.58829300  |
| H | -5.82288400 | -3.00976400 | 0.13538500  |
| C | -3.51959200 | -3.32233400 | 2.55877300  |
| H | -2.56347900 | -1.73367600 | 3.62592100  |
| H | -4.58651700 | -4.75644200 | 1.37842200  |
| C | -5.66557800 | 1.06487600  | 0.96714600  |
| C | -6.21815600 | 1.21702900  | 2.24168000  |
| C | -5.20607700 | 2.19075500  | 0.29374200  |
| C | -6.29580500 | 2.46320400  | 2.84232100  |
| H | -6.59376500 | 0.35245700  | 2.77105400  |
| C | -5.27048000 | 3.45001600  | 0.88266100  |
| H | -4.79037900 | 2.09674700  | -0.69767500 |
| C | -5.81185200 | 3.55814900  | 2.14682200  |
| H | -6.72120900 | 2.58985600  | 3.82798200  |
| H | -4.91134900 | 4.32981200  | 0.36740300  |
| F | -2.83875200 | -4.28180300 | 3.23176400  |
| F | -5.87767200 | 4.77967800  | 2.72951700  |
| H | 11.05008600 | -0.98354800 | 1.03596100  |

**Type-II product (TCF5-based)**

|    |              |             |             |
|----|--------------|-------------|-------------|
| Cl | -0.27070500  | 1.38975500  | 0.32652400  |
| O  | -6.61038500  | 0.18701500  | -0.34850600 |
| N  | -10.01319800 | 0.51470000  | -0.87918300 |
| N  | -9.34361100  | -3.71384700 | -0.02113900 |
| N  | -5.85637600  | -4.39526600 | 0.70127700  |
| C  | -9.26302700  | -0.32686200 | -0.62288700 |
| C  | -8.87829400  | -2.66297000 | -0.14568700 |
| C  | -5.91292800  | -3.27031700 | 0.44382100  |
| C  | -8.35455800  | -1.36300800 | -0.30879900 |
| C  | -7.00159800  | -1.07663400 | -0.17321600 |
| C  | -5.89162300  | -1.89706900 | 0.14301800  |
| C  | -4.72410500  | -1.11828900 | 0.14725200  |
| C  | -5.13460700  | 0.29754100  | -0.24274300 |
| C  | -3.45275800  | -1.55684900 | 0.47961700  |
| H  | -3.36794300  | -2.60085900 | 0.75081700  |
| C  | -2.31541100  | -0.75716500 | 0.46894600  |
| H  | -2.43771800  | 0.27396600  | 0.18231000  |
| C  | -1.02019400  | -1.17436700 | 0.76569900  |
| C  | -0.75721700  | -2.61313600 | 1.15148200  |
| H  | -0.74524500  | -3.23232600 | 0.24757300  |
| H  | -1.58234600  | -2.97705600 | 1.76380700  |
| C  | 0.55061100   | -2.77250400 | 1.90612000  |
| H  | 0.46857700   | -2.29177900 | 2.88471000  |
| C  | 1.69501300   | -2.13714000 | 1.13081300  |
| H  | 1.85971700   | -2.70054600 | 0.20496400  |
| H  | 2.61483800   | -2.20708400 | 1.71205500  |
| C  | 1.42689600   | -0.68318500 | 0.81457600  |
| C  | 0.07583100   | -0.30134700 | 0.68014800  |
| C  | 2.44731800   | 0.25849200  | 0.69883300  |
| H  | 2.10437100   | 1.27945400  | 0.66242200  |
| H  | 0.75932100   | -3.82862200 | 2.08082000  |
| O  | 9.99616800   | 0.64088900  | -1.11893500 |
| N  | 5.75981700   | -1.23443800 | 0.09401700  |
| C  | 4.76214700   | 1.28299200  | 1.02163900  |



|   |             |             |             |
|---|-------------|-------------|-------------|
| C | 3.84505600  | 0.11667400  | 0.64598900  |
| C | 4.44691600  | -1.07062400 | 0.29112200  |
| C | 6.21683000  | -2.54051600 | -0.39326100 |
| H | 5.54062300  | -3.29550000 | 0.00023800  |
| H | 6.14586400  | -2.55564700 | -1.48387400 |
| C | 7.63030100  | -2.77173700 | 0.06932600  |
| H | 7.95555600  | -3.76878600 | -0.22977800 |
| H | 7.65074000  | -2.73621900 | 1.16148600  |
| C | 8.60037100  | -1.72815700 | -0.50403300 |
| C | 7.97810600  | -0.33191600 | -0.37592400 |
| C | 8.73664700  | 0.82634400  | -0.64223900 |
| C | 8.20481200  | 2.09293100  | -0.43635000 |
| H | 8.78912900  | 2.97652400  | -0.63831700 |
| C | 6.91796100  | 2.23231200  | 0.06274700  |
| H | 6.55724900  | 3.23033300  | 0.25678700  |
| C | 6.11077600  | 1.13833200  | 0.31761700  |
| C | 6.64336800  | -0.13636600 | 0.03005300  |
| C | 4.11635500  | 2.64614700  | 0.74665100  |
| H | 4.77238900  | 3.45377100  | 1.06285400  |
| H | 3.19751900  | 2.76335700  | 1.31848700  |
| H | 3.88919900  | 2.77734700  | -0.31205700 |
| C | 5.02229200  | 1.16878400  | 2.54689100  |
| H | 5.68283300  | 1.97252700  | 2.87646400  |
| H | 5.49183300  | 0.21565500  | 2.79243300  |
| H | 4.07959100  | 1.23902600  | 3.09329200  |
| C | 8.89888000  | -2.06061900 | -1.97785200 |
| H | 9.58476000  | -1.33478300 | -2.40795900 |
| H | 7.98930000  | -2.06311000 | -2.57972900 |
| H | 9.35486700  | -3.05070500 | -2.04678300 |
| C | 9.89385300  | -1.84627400 | 0.32675100  |
| H | 9.71898300  | -1.52497100 | 1.35517600  |
| H | 10.20438700 | -2.89319700 | 0.34944500  |
| H | 10.70416400 | -1.25585600 | -0.08741600 |
| C | 10.81643100 | 1.77645900  | -1.36566000 |
| H | 10.97591800 | 2.35526900  | -0.45322800 |
| H | 10.38302800 | 2.41942200  | -2.13490400 |
| H | 3.86277200  | -1.94739700 | 0.07178000  |
| C | -4.84877300 | 1.28945600  | 0.87750600  |
| C | -3.90996000 | 2.30677800  | 0.74214400  |
| C | -5.50543700 | 1.13058200  | 2.09871300  |
| C | -3.62383600 | 3.15838400  | 1.80303700  |
| H | -3.38427500 | 2.44448200  | -0.19066000 |
| C | -5.23943000 | 1.97495000  | 3.16502900  |
| H | -6.23465000 | 0.34259900  | 2.22570500  |
| C | -4.29769400 | 2.97485700  | 2.99321900  |
| H | -2.89231800 | 3.94807300  | 1.70660200  |
| H | -5.74671000 | 1.86329800  | 4.11293700  |
| C | -4.67283500 | 0.74408500  | -1.62020000 |
| C | -5.17244700 | 1.94920400  | -2.12150600 |
| C | -3.82670500 | -0.01955300 | -2.41661500 |
| C | -4.81999800 | 2.39625100  | -3.38421000 |
| H | -5.84523000 | 2.54468400  | -1.52042400 |
| C | -3.45771400 | 0.41636400  | -3.68525000 |
| H | -3.44187600 | -0.96215400 | -2.05975000 |
| C | -3.96024600 | 1.61775700  | -4.14050300 |
| H | -5.20045800 | 3.32742900  | -3.77979900 |
| H | -2.79664400 | -0.16869200 | -4.30886400 |
| F | -4.02900400 | 3.80062900  | 4.03158800  |
| F | -3.60561200 | 2.05091900  | -5.37272000 |
| H | 11.76646400 | 1.38261400  | -1.71656600 |

#### TCF5-based (Path II-c)

##### FP-INT-II-A(c)

|    |             |             |             |
|----|-------------|-------------|-------------|
| Cl | 0.61148300  | 2.90164300  | 0.46795900  |
| O  | -5.01472700 | -0.39155200 | 0.38190600  |
| N  | -8.16834100 | -1.64211100 | 1.09761300  |
| N  | -6.86163800 | -3.68187900 | -2.53921800 |

|   |             |             |             |
|---|-------------|-------------|-------------|
| N | -3.53877800 | -2.70172400 | -3.51161400 |
| C | -7.34966000 | -1.78878800 | 0.29616200  |
| C | -6.61199900 | -2.91061000 | -1.71656400 |
| C | -3.78904300 | -2.06501100 | -2.58235800 |
| C | -6.35114700 | -1.97562300 | -0.68971300 |
| C | -5.17452400 | -1.25288500 | -0.61878100 |
| C | -4.01711000 | -1.25327400 | -1.45326700 |
| C | -3.10187200 | -0.32851900 | -0.96885500 |
| C | -3.71360300 | 0.31506000  | 0.26867300  |
| C | -1.83863500 | -0.07863300 | -1.51570100 |
| H | -1.58472500 | -0.65953700 | -2.39183000 |
| C | -0.93782800 | 0.82668000  | -1.01099100 |
| H | -1.23001300 | 1.39696600  | -0.14473500 |
| C | 0.34767300  | 1.08710000  | -1.52630800 |
| C | 0.85856300  | 0.33593100  | -2.73672800 |
| H | 0.51407500  | 0.84266100  | -3.64473900 |
| H | 0.42028300  | -0.66027700 | -2.75927900 |
| C | 2.37676300  | 0.22817500  | -2.74302500 |
| H | 2.70031300  | -0.38626100 | -1.89994700 |
| C | 3.00249300  | 1.61042500  | -2.64007300 |
| H | 2.80280800  | 2.17810000  | -3.55509500 |
| H | 4.08619000  | 1.54085700  | -2.55065500 |
| C | 2.46240300  | 2.37732600  | -1.45454800 |
| C | 1.17023600  | 2.04123200  | -0.95614700 |
| C | 3.21294200  | 3.35927700  | -0.88524700 |
| H | 2.87247700  | 3.92715600  | -0.02911900 |
| H | 2.71189100  | -0.26829000 | -3.65419700 |
| O | 4.41274300  | 3.65198200  | -1.35891900 |
| C | 5.17657600  | 4.65466700  | -0.63894700 |
| H | 4.70554300  | 5.62413500  | -0.81033200 |
| H | 5.13135300  | 4.41987900  | 0.42559900  |
| C | 6.59217200  | 4.61810200  | -1.15546100 |
| H | 7.04329500  | 3.64167900  | -0.97731100 |
| H | 6.62158100  | 4.83132100  | -2.22433100 |
| H | 7.18510600  | 5.37297400  | -0.63772700 |
| O | 6.71066900  | -1.57755600 | 0.11633100  |
| N | 2.03538800  | -1.11270500 | 1.09215000  |
| C | 1.38439300  | -3.50153300 | -0.47405600 |
| C | 0.35932200  | -2.43229100 | -0.09578400 |
| C | 0.72272200  | -1.72018800 | 1.18180800  |
| H | 0.66483100  | -2.40573500 | 2.04006500  |
| C | 2.35351500  | -0.25016000 | 2.21084800  |
| H | 1.45664400  | 0.31911000  | 2.45664000  |
| H | 2.61334500  | -0.84150400 | 3.10226900  |
| C | 3.47138800  | 0.68151700  | 1.82347100  |
| H | 3.69795600  | 1.36730200  | 2.64272700  |
| H | 3.12791200  | 1.28350300  | 0.98334200  |
| C | 4.75436600  | -0.06089100 | 1.42231000  |
| C | 4.40793000  | -1.29509000 | 0.57177100  |
| C | 5.42868900  | -2.00938000 | -0.08213800 |
| C | 5.15367900  | -3.11398700 | -0.88026200 |
| H | 5.94024400  | -3.65013100 | -1.38645300 |
| C | 3.84064500  | -3.53883100 | -1.00337700 |
| H | 3.64197700  | -4.40836600 | -1.61471600 |
| C | 2.79064900  | -2.91281400 | -0.35624100 |
| C | 3.07480600  | -1.77492100 | 0.44798800  |
| C | 1.25712700  | -4.71483000 | 0.46595500  |
| H | 1.98012300  | -5.48546400 | 0.19418000  |
| H | 0.25451900  | -5.14578800 | 0.39971400  |
| H | 1.44332800  | -4.43853200 | 1.50411200  |
| C | 1.07103000  | -3.95502300 | -1.90816200 |
| H | 1.67758000  | -4.80621900 | -2.21661100 |
| H | 1.23697300  | -3.14376600 | -2.61887900 |
| H | 0.02390900  | -4.25841900 | -1.97564100 |
| C | 5.49947400  | -0.49598500 | 2.69881600  |
| H | 6.40327100  | -1.05062200 | 2.45494200  |
| H | 4.86893900  | -1.13033800 | 3.32352900  |
| H | 5.78099800  | 0.38404900  | 3.28340700  |
| C | 5.60761200  | 0.97025100  | 0.65564900  |
| H | 5.16972000  | 1.18228400  | -0.31984800 |
| H | 5.62835600  | 1.90443700  | 1.22260800  |

|   |             |             |             |
|---|-------------|-------------|-------------|
| H | 6.62917200  | 0.63761100  | 0.50710700  |
| C | 7.77387600  | -2.24847600 | -0.54089700 |
| H | 7.66507500  | -2.20274200 | -1.62739500 |
| H | 7.84175900  | -3.29378300 | -0.22915800 |
| H | 0.00787100  | -0.92087300 | 1.37425500  |
| H | 0.30488600  | -1.69783100 | -0.89666800 |
| H | -0.63329300 | -2.87709800 | -0.00017900 |
| C | -2.92415400 | -0.02805000 | 1.52840000  |
| C | -2.19326800 | 0.93236100  | 2.22098700  |
| C | -2.90635900 | -1.34868400 | 1.97938900  |
| C | -1.46223100 | 0.59159900  | 3.35279100  |
| H | -2.18672500 | 1.95981000  | 1.88984500  |
| C | -2.19254700 | -1.70391600 | 3.11312600  |
| H | -3.45802500 | -2.11400700 | 1.45239500  |
| C | -1.48330100 | -0.72093300 | 3.77939800  |
| H | -0.88966100 | 1.33156100  | 3.89349100  |
| H | -2.17621600 | -2.72335000 | 3.47124600  |
| C | -4.07398100 | 1.78318500  | 0.12451300  |
| C | -4.74987700 | 2.40034400  | 1.18062000  |
| C | -3.82623200 | 2.50871700  | -1.03613200 |
| C | -5.15145000 | 3.72278300  | 1.09231000  |
| H | -4.96697900 | 1.84320800  | 2.08106800  |
| C | -4.21692600 | 3.83944900  | -1.13956400 |
| H | -3.32371000 | 2.05150800  | -1.87418700 |
| C | -4.86858700 | 4.41929300  | -0.07046800 |
| H | -5.67331700 | 4.20912300  | 1.90428800  |
| H | -4.02245400 | 4.41267400  | -2.03490600 |
| F | -0.77434400 | -1.06171000 | 4.87900700  |
| F | -5.25028600 | 5.71348600  | -0.16112100 |
| H | 8.68110200  | -1.72580900 | -0.24737900 |

#### FP-TS-II-A(c)

|    |             |             |             |
|----|-------------|-------------|-------------|
| Cl | 0.84038100  | 2.80651200  | 0.84630800  |
| O  | -4.87838700 | -0.06296700 | 0.09941500  |
| N  | -8.26131100 | -0.72123400 | 0.29399600  |
| N  | -6.94722400 | -2.36604800 | -3.53561600 |
| N  | -3.33934100 | -1.97418300 | -3.98228900 |
| C  | -7.39522700 | -0.90399600 | -0.45151900 |
| C  | -6.65857700 | -1.80932400 | -2.56329200 |
| C  | -3.60990700 | -1.45792500 | -2.98289700 |
| C  | -6.34648600 | -1.13386800 | -1.36700600 |
| C  | -5.05377500 | -0.69872200 | -1.06772000 |
| C  | -3.83853400 | -0.80943100 | -1.76090500 |
| C  | -2.80721200 | -0.18812400 | -1.00379000 |
| C  | -3.47774900 | 0.39110200  | 0.23921300  |
| C  | -1.48629100 | -0.12199400 | -1.33042000 |
| H  | -1.19570800 | -0.56007100 | -2.27586100 |
| C  | -0.46660300 | 0.46354400  | -0.50415400 |
| H  | -0.83040800 | 1.08473600  | 0.30111800  |
| C  | 0.77090800  | 0.94798700  | -1.10770600 |
| C  | 1.30422800  | 0.21663800  | -2.31803600 |
| H  | 0.74428600  | 0.53619700  | -3.20378300 |
| H  | 1.10709100  | -0.85118700 | -2.20381800 |
| C  | 2.79414600  | 0.43712100  | -2.53296800 |
| H  | 3.34842700  | -0.09930400 | -1.76103500 |
| C  | 3.13613500  | 1.92069100  | -2.47161000 |
| H  | 2.65938200  | 2.44016500  | -3.31016100 |
| H  | 4.20885000  | 2.07674200  | -2.57657800 |
| C  | 2.66766500  | 2.53863800  | -1.17536500 |
| C  | 1.45575100  | 2.00482100  | -0.60221000 |
| C  | 3.37038300  | 3.52345100  | -0.58036800 |
| H  | 3.05939200  | 3.97356100  | 0.35327000  |
| H  | 3.09670400  | 0.01879700  | -3.49370000 |
| O  | 4.50586700  | 3.99201800  | -1.11724400 |
| C  | 5.24259100  | 4.93318600  | -0.30740900 |
| H  | 4.59554800  | 5.78601100  | -0.08753400 |
| H  | 5.51055100  | 4.44591500  | 0.63331800  |
| C  | 6.46973000  | 5.35527200  | -1.07665800 |
| H  | 7.10575300  | 4.49631800  | -1.29357400 |

|   |             |             |             |
|---|-------------|-------------|-------------|
| H | 6.19310000  | 5.83357500  | -2.01692500 |
| H | 7.04440600  | 6.06803900  | -0.48383300 |
| O | 6.21877600  | -1.81956400 | -0.42533800 |
| N | 1.71209000  | -1.55407200 | 1.21500700  |
| C | 0.92644800  | -3.81947300 | -0.22703100 |
| C | -0.10974600 | -2.71727200 | 0.01423800  |
| C | 0.38037400  | -1.64259100 | 0.94803100  |
| H | -0.22825000 | -1.44531300 | 1.82200600  |
| C | 2.15077400  | -0.78377000 | 2.37616300  |
| H | 1.28869900  | -0.25235800 | 2.77247000  |
| H | 2.49769400  | -1.48108600 | 3.14310400  |
| C | 3.23839700  | 0.17915200  | 1.96735900  |
| H | 3.55702500  | 0.75863200  | 2.83514100  |
| H | 2.82258400  | 0.87992800  | 1.24632200  |
| C | 4.46324200  | -0.51420400 | 1.35169000  |
| C | 4.00997000  | -1.61331800 | 0.38076500  |
| C | 4.92743400  | -2.23868600 | -0.49063200 |
| C | 4.52282900  | -3.23676000 | -1.36880500 |
| H | 5.22411200  | -3.68327200 | -2.05555500 |
| C | 3.21487900  | -3.70152700 | -1.33690700 |
| H | 2.94072100  | -4.51588200 | -1.99122500 |
| C | 2.28640100  | -3.17685300 | -0.46010400 |
| C | 2.68826800  | -2.10066200 | 0.36052000  |
| C | 1.02755500  | -4.72009100 | 1.02162600  |
| H | 1.76848500  | -5.50397100 | 0.86143300  |
| H | 0.06365500  | -5.19128700 | 1.22527300  |
| H | 1.32251000  | -4.15205300 | 1.90465100  |
| C | 0.45196400  | -4.66177300 | -1.41338500 |
| H | 1.07886800  | -5.54098700 | -1.56122700 |
| H | 0.44838000  | -4.07902800 | -2.33584800 |
| H | -0.56488800 | -5.01187700 | -1.22828000 |
| C | 5.30652500  | -1.15790600 | 2.47010500  |
| H | 6.17558700  | -1.66508700 | 2.05537000  |
| H | 4.72751800  | -1.88740800 | 3.03790500  |
| H | 5.65426800  | -0.38584500 | 3.16028700  |
| C | 5.28286200  | 0.60420000  | 0.67708300  |
| H | 4.78712200  | 0.96532400  | -0.22213800 |
| H | 5.36095100  | 1.44577300  | 1.36909200  |
| H | 6.28379300  | 0.28104100  | 0.41434700  |
| C | 7.18108100  | -2.40147500 | -1.29560200 |
| H | 6.92689900  | -2.22482200 | -2.34308700 |
| H | 7.27722200  | -3.47523400 | -1.11950600 |
| H | -0.00523900 | -0.52724500 | 0.26811000  |
| H | -0.39669100 | -2.27664300 | -0.94313000 |
| H | -1.02444900 | -3.14401800 | 0.42570700  |
| C | -2.94717700 | -0.23850900 | 1.52244400  |
| C | -2.21302300 | 0.48655400  | 2.45675800  |
| C | -3.17872200 | -1.59581100 | 1.75123900  |
| C | -1.72044800 | -0.12183100 | 3.60598300  |
| H | -2.01525000 | 1.53651900  | 2.30076900  |
| C | -2.69872000 | -2.21959400 | 2.89280200  |
| H | -3.74290400 | -2.17718600 | 1.03566500  |
| C | -1.97714600 | -1.46495100 | 3.80185100  |
| H | -1.15056400 | 0.43560600  | 4.33578200  |
| H | -2.87611900 | -3.26944800 | 3.07823600  |
| C | -3.54832700 | 1.91078700  | 0.27337000  |
| C | -4.31134200 | 2.50929000  | 1.27995400  |
| C | -2.93105800 | 2.71882400  | -0.67464200 |
| C | -4.44077600 | 3.88640100  | 1.35339800  |
| H | -4.81125500 | 1.89349100  | 2.01456200  |
| C | -3.04402800 | 4.10407600  | -0.61293400 |
| H | -2.35264200 | 2.27934400  | -1.47248000 |
| C | -3.79458900 | 4.65856200  | 0.40280600  |
| H | -5.02821400 | 4.35761700  | 2.12879700  |
| H | -2.56087300 | 4.73875000  | -1.34229300 |
| F | -1.50349600 | -2.06543700 | 4.91660100  |
| F | -3.90928200 | 6.00565100  | 0.47264800  |
| H | 8.12240500  | -1.91039400 | -1.06391500 |

|    |             |             |             |
|----|-------------|-------------|-------------|
| Cl | 2.41815800  | 1.02866900  | 1.57409800  |
| O  | -2.96538000 | 2.80871700  | 0.16585200  |
| N  | -5.54276300 | 5.09234800  | 0.22618700  |
| N  | -5.85753600 | 3.07294000  | -3.63019700 |
| N  | -3.12837600 | 0.62609200  | -4.06237300 |
| C  | -5.11766400 | 4.30003700  | -0.50577300 |
| C  | -5.28311100 | 3.18349900  | -2.62965600 |
| C  | -3.01428700 | 1.08455200  | -3.00375900 |
| C  | -4.61420400 | 3.34124900  | -1.40408000 |
| C  | -3.48806500 | 2.56898900  | -1.05343700 |
| C  | -2.78573900 | 1.57529600  | -1.71581000 |
| C  | -1.68520000 | 1.12093400  | -0.88035300 |
| C  | -1.79507300 | 1.93969900  | 0.41132700  |
| C  | -0.77379100 | 0.19203100  | -1.19453600 |
| H  | -0.87126200 | -0.27172700 | -2.16967900 |
| C  | 0.39868900  | -0.25828000 | -0.37054500 |
| H  | 0.28770200  | 0.03564800  | 0.66371400  |
| C  | 1.72526100  | 0.21661600  | -0.90471000 |
| C  | 1.97198700  | -0.04321400 | -2.37045100 |
| H  | 1.42247700  | 0.69629700  | -2.96455000 |
| H  | 1.53565800  | -1.01235100 | -2.62670500 |
| C  | 3.44836400  | -0.00981800 | -2.73716700 |
| H  | 3.94814500  | -0.88341600 | -2.30879400 |
| C  | 4.09739700  | 1.25742800  | -2.19315900 |
| H  | 3.64074900  | 2.13011000  | -2.67534900 |
| H  | 5.15978600  | 1.28865900  | -2.43131500 |
| C  | 3.91322900  | 1.36400600  | -0.69781800 |
| C  | 2.67121200  | 0.82034700  | -0.16837600 |
| C  | 4.82806700  | 1.97484600  | 0.07075000  |
| H  | 4.71173600  | 2.08111500  | 1.14087000  |
| H  | 3.56996800  | -0.06530200 | -3.82025000 |
| O  | 5.94862000  | 2.51971200  | -0.46138700 |
| C  | 6.86692600  | 3.08526000  | 0.48876600  |
| H  | 6.34533500  | 3.84739100  | 1.07507100  |
| H  | 7.20316400  | 2.29781400  | 1.16976300  |
| C  | 8.02770600  | 3.68199000  | -0.27001800 |
| H  | 8.54407000  | 2.91830400  | -0.85315400 |
| H  | 7.68616200  | 4.46664700  | -0.94642400 |
| H  | 8.73966700  | 4.11855800  | 0.43183900  |
| O  | 2.98226700  | -4.15793400 | -1.27814200 |
| N  | -1.04617600 | -3.60192700 | 1.28059400  |
| C  | -2.65096600 | -3.42331400 | -1.03274900 |
| C  | -2.93180600 | -2.56099500 | 0.20797300  |
| C  | -2.22083100 | -3.08634500 | 1.38224200  |
| H  | -2.66199000 | -3.07842900 | 2.36845200  |
| C  | -0.34560300 | -4.12406400 | 2.46681600  |
| H  | -0.94859300 | -3.88768800 | 3.33870200  |
| H  | -0.28714700 | -5.20683200 | 2.36094700  |
| C  | 1.01577300  | -3.47652800 | 2.51211800  |
| H  | 1.52554800  | -3.77437600 | 3.42810600  |
| H  | 0.88295700  | -2.39301900 | 2.55350100  |
| C  | 1.88382600  | -3.85716900 | 1.30136100  |
| C  | 1.04007900  | -3.83287200 | 0.02008800  |
| C  | 1.64530600  | -3.95174200 | -1.25181200 |
| C  | 0.88874500  | -3.85005400 | -2.41337200 |
| H  | 1.36315800  | -3.91441100 | -3.37972100 |
| C  | -0.48357600 | -3.65892900 | -2.35035600 |
| H  | -1.03907000 | -3.57866900 | -3.27239200 |
| C  | -1.13933600 | -3.57276000 | -1.13841700 |
| C  | -0.35403200 | -3.67567800 | 0.02421900  |
| C  | -3.28617800 | -4.81735000 | -0.86742800 |
| H  | -3.08774200 | -5.42145300 | -1.75257500 |
| H  | -4.36713900 | -4.72859200 | -0.74496400 |
| H  | -2.88699600 | -5.35076200 | -0.00306600 |
| C  | -3.26550800 | -2.72580500 | -2.24698900 |
| H  | -3.18199300 | -3.33846300 | -3.14390700 |
| H  | -2.79273700 | -1.76434300 | -2.43885200 |
| H  | -4.32737200 | -2.55280500 | -2.06743500 |
| C  | 2.45830000  | -5.27189200 | 1.51136400  |
| H  | 3.07118200  | -5.57103600 | 0.66471100  |
| H  | 1.66717400  | -6.01279600 | 1.63476000  |

|   |             |             |             |
|---|-------------|-------------|-------------|
| H | 3.07965500  | -5.28343100 | 2.40871800  |
| C | 3.02966900  | -2.82753200 | 1.25727400  |
| H | 2.65732200  | -1.84103300 | 0.98467800  |
| H | 3.47115800  | -2.75550600 | 2.25322300  |
| H | 3.80727600  | -3.10904800 | 0.55613900  |
| C | 3.65095500  | -4.23801400 | -2.53407900 |
| H | 3.53094100  | -3.31474600 | -3.10381300 |
| H | 3.28696100  | -5.08350300 | -3.12099500 |
| H | 0.41790900  | -1.35078100 | -0.38347600 |
| H | -2.57291300 | -1.53583100 | 0.03640900  |
| H | -3.99645900 | -2.49258700 | 0.42403800  |
| C | -2.16640600 | 1.04681600  | 1.59172900  |
| C | -1.21956700 | 0.61238000  | 2.51693200  |
| C | -3.48193300 | 0.59995400  | 1.72102900  |
| C | -1.56529300 | -0.25787400 | 3.54343900  |
| H | -0.19919600 | 0.95709900  | 2.45390100  |
| C | -3.84992200 | -0.26076500 | 2.74630100  |
| H | -4.23601300 | 0.92432200  | 1.01960100  |
| C | -2.87820100 | -0.67565600 | 3.63754200  |
| H | -0.83258000 | -0.59754700 | 4.26188200  |
| H | -4.86856600 | -0.60691200 | 2.85163400  |
| C | -0.63430100 | 2.88753400  | 0.65847400  |
| C | -0.54439600 | 3.57243300  | 1.87179300  |
| C | 0.29578600  | 3.16499100  | -0.33885200 |
| C | 0.47330400  | 4.48570000  | 2.10272200  |
| H | -1.27273200 | 3.39208900  | 2.64984600  |
| C | 1.32522200  | 4.07306300  | -0.12606300 |
| H | 0.23344200  | 2.65827900  | -1.28903400 |
| C | 1.39638500  | 4.70792600  | 1.09654100  |
| H | 0.55599100  | 5.01338600  | 3.04256100  |
| H | 2.06539000  | 4.27214900  | -0.88791200 |
| F | -3.22376500 | -1.53034300 | 4.63257400  |
| F | 2.40678200  | 5.58376500  | 1.32210400  |
| H | 4.70067300  | -4.38429800 | -2.29673100 |

#### FP-TS-II-B(c)

|    |             |             |             |
|----|-------------|-------------|-------------|
| Cl | 1.45307200  | 2.02297200  | 1.62941200  |
| O  | -4.04707400 | 0.79166500  | 0.18065600  |
| N  | -7.41292300 | 1.57064200  | 0.04941600  |
| N  | -6.42854300 | -0.11836700 | -3.85495600 |
| N  | -2.95247900 | -1.08115500 | -4.05668600 |
| C  | -6.61030400 | 1.11719200  | -0.64844800 |
| C  | -6.05249300 | 0.17977100  | -2.80321200 |
| C  | -3.08964900 | -0.64404500 | -2.99613500 |
| C  | -5.63771100 | 0.55974600  | -1.50927000 |
| C  | -4.33079300 | 0.40277700  | -1.06405300 |
| C  | -3.17505900 | -0.12047900 | -1.69374700 |
| C  | -2.08672800 | -0.03973300 | -0.81342600 |
| C  | -2.59939000 | 0.62470500  | 0.45918100  |
| C  | -0.81886600 | -0.59685100 | -1.01113900 |
| H  | -0.62430100 | -0.84721400 | -2.04955100 |
| C  | 0.42480700  | -0.19113000 | -0.23537100 |
| H  | 0.18377800  | 0.00959600  | 0.80025900  |
| C  | 1.20769600  | 0.94527600  | -0.82948100 |
| C  | 1.50288000  | 0.83802800  | -2.30572600 |
| H  | 0.61909800  | 1.14317600  | -2.87874400 |
| H  | 1.66738200  | -0.21600400 | -2.54818300 |
| C  | 2.70493100  | 1.67038600  | -2.72868700 |
| H  | 3.61617500  | 1.21637900  | -2.32877800 |
| C  | 2.57418300  | 3.09374700  | -2.19984200 |
| H  | 1.69928900  | 3.56907600  | -2.65966200 |
| H  | 3.43800500  | 3.69667100  | -2.47683000 |
| C  | 2.41414100  | 3.10530900  | -0.69812100 |
| C  | 1.70205300  | 1.97490000  | -0.12408900 |
| C  | 2.85746100  | 4.13663200  | 0.03745300  |
| H  | 2.73825600  | 4.17913500  | 1.11174200  |
| H  | 2.79556000  | 1.67556600  | -3.81607500 |
| O  | 3.46168900  | 5.20365100  | -0.53603000 |
| C  | 3.95241700  | 6.19846200  | 0.37874700  |

|   |             |             |             |
|---|-------------|-------------|-------------|
| H | 3.12161600  | 6.55217100  | 0.99609600  |
| H | 4.69810400  | 5.73988100  | 1.03470300  |
| C | 4.55293900  | 7.32636700  | -0.42515500 |
| H | 5.37971900  | 6.96762800  | -1.03964000 |
| H | 3.80437500  | 7.77949800  | -1.07643900 |
| H | 4.93358900  | 8.09531300  | 0.24854700  |
| O | 5.17555800  | -2.30605400 | -0.94047000 |
| N | 0.98711700  | -3.36621300 | 1.14716000  |
| C | -0.22248200 | -4.05946400 | -1.30729200 |
| C | -0.98070200 | -3.33716200 | -0.19624900 |
| C | -0.33927400 | -3.31763000 | 1.03527900  |
| H | -0.88252600 | -3.21244800 | 1.96258800  |
| C | 1.62781300  | -3.33117200 | 2.45961200  |
| H | 0.84640800  | -3.26024800 | 3.21201600  |
| H | 2.15857900  | -4.27257100 | 2.61215100  |
| C | 2.56227600  | -2.14736900 | 2.50574400  |
| H | 3.01250700  | -2.06675500 | 3.49590200  |
| H | 1.97644200  | -1.23969800 | 2.34342100  |
| C | 3.68110600  | -2.24398700 | 1.45252600  |
| C | 3.11418600  | -2.75655900 | 0.11932900  |
| C | 3.88031900  | -2.69450600 | -1.06619200 |
| C | 3.32202500  | -3.00838700 | -2.29909300 |
| H | 3.90565400  | -2.92996600 | -3.20255800 |
| C | 1.99945200  | -3.42107400 | -2.38065000 |
| H | 1.58402500  | -3.63938700 | -3.35331500 |
| C | 1.22065100  | -3.56789700 | -1.24981800 |
| C | 1.80696100  | -3.25806600 | -0.00491700 |
| C | -0.24677500 | -5.57975700 | -1.02701900 |
| H | 0.30191500  | -6.11163100 | -1.80636400 |
| H | -1.27533300 | -5.94622900 | -1.01541300 |
| H | 0.21144000  | -5.81381500 | -0.06560700 |
| C | -0.88694700 | -3.81025500 | -2.66307200 |
| H | -0.45408100 | -4.44261700 | -3.43804500 |
| H | -0.80038400 | -2.77467500 | -2.98365700 |
| H | -1.94825800 | -4.05358900 | -2.59728000 |
| C | 4.77626600  | -3.19961300 | 1.96105800  |
| H | 5.57447700  | -3.30037100 | 1.22914800  |
| H | 4.37471700  | -4.19363200 | 2.16357000  |
| H | 5.20384300  | -2.81000400 | 2.88744000  |
| C | 4.25250700  | -0.81745900 | 1.31657700  |
| H | 3.53099600  | -0.15603800 | 0.83551900  |
| H | 4.45331700  | -0.42319800 | 2.31491000  |
| H | 5.17503000  | -0.79594800 | 0.74685300  |
| C | 5.95014100  | -2.08842600 | -2.11400700 |
| H | 5.49015900  | -1.33212200 | -2.75395000 |
| H | 6.08497900  | -3.01331700 | -2.67888500 |
| H | 1.09336100  | -1.05209900 | -0.23843700 |
| H | -0.99490900 | -1.91417600 | -0.54874500 |
| H | -2.05377500 | -3.49434200 | -0.15979100 |
| C | -2.49289300 | -0.31170400 | 1.65839000  |
| C | -1.51480600 | -0.15361200 | 2.63757600  |
| C | -3.38275100 | -1.38155800 | 1.76330900  |
| C | -1.43602000 | -1.02522700 | 3.71718700  |
| H | -0.80988900 | 0.66100600  | 2.57827400  |
| C | -3.32353300 | -2.25839700 | 2.83715000  |
| H | -4.14427600 | -1.53177900 | 1.01210700  |
| C | -2.35219100 | -2.05532600 | 3.80101800  |
| H | -0.68267100 | -0.90154100 | 4.48221900  |
| H | -4.01721800 | -3.08204800 | 2.92901000  |
| C | -2.07675200 | 2.03440700  | 0.66762800  |
| C | -2.34179000 | 2.70697300  | 1.86157600  |
| C | -1.43926500 | 2.71737100  | -0.36439500 |
| C | -1.93938600 | 4.02135700  | 2.04093000  |
| H | -2.86770500 | 2.20642600  | 2.66178500  |
| C | -1.02578700 | 4.03283200  | -0.20258800 |
| H | -1.24898400 | 2.22710000  | -1.30660400 |
| C | -1.27639100 | 4.65336800  | 1.00396300  |
| H | -2.13139100 | 4.54866700  | 2.96469400  |
| H | -0.50691000 | 4.56003300  | -0.98986900 |
| F | -2.29076600 | -2.90167400 | 4.85446100  |
| F | -0.86182700 | 5.93027600  | 1.18004000  |

H 6.91650400 -1.73281600 -1.76706500

**TCF-A6(+2H, c)**

Cl 2.47126200 -2.26149400 -0.98993100  
O -2.39588900 0.75679700 1.18786500  
N -3.73806300 2.69320100 3.74814500  
N -2.93368000 5.43730200 0.44221900  
N -1.67334300 3.77958400 -2.42075100  
C -3.34739200 2.84348900 2.67351800  
C -2.89583000 4.35115800 0.82834000  
C -1.77919300 2.94038500 -1.63987800  
C -2.86899300 3.03453300 1.35058900  
C -2.40372400 1.96031100 0.63752100  
C -1.88058500 1.87241300 -0.71387900  
C -1.53360600 0.58934000 -0.97348600  
C -1.82221800 -0.24623100 0.26483200  
C -1.08679200 0.06355600 -2.28987500  
H -1.05595500 0.89122400 -2.99595000  
C 0.23137500 -0.73321300 -2.34288300  
H 0.15357100 -1.61928600 -1.72023100  
C 1.47476700 0.03115700 -1.98351900  
C 1.54585600 1.48017600 -2.39995600  
H 0.93490100 2.08886000 -1.72342600  
H 1.08837700 1.58662900 -3.38730100  
C 2.96691100 2.02695800 -2.42275100  
H 3.50798900 1.59249000 -3.26768900  
C 3.69258000 1.67897100 -1.12864600  
H 3.18969100 2.17234600 -0.28798300  
H 4.71614700 2.05072600 -1.14102800  
C 3.70050000 0.18705500 -0.90063400  
C 2.52188100 -0.53115300 -1.35600500  
C 4.71465400 -0.41382900 -0.25823300  
H 4.73266800 -1.47886200 -0.06925800  
O 5.76653200 0.29160100 0.21506200  
C 6.81532400 -0.49155600 0.81250000  
H 6.39219700 -1.08476800 1.62812900  
H 7.21741700 -1.17626500 0.06041100  
C 7.88068400 0.45041300 1.31859900  
H 8.29797100 1.03986400 0.50117500  
H 7.47304400 1.13053200 2.06765600  
H 8.68837900 -0.12194600 1.77689500  
H 0.31557200 -1.09320000 -3.37387600  
H -1.87868000 -0.60510300 -2.64040900  
C -2.89876200 -1.27761900 -0.04457400  
C -2.57378100 -2.43062900 -0.76019000  
C -4.22331900 -1.06071500 0.32613100  
C -3.54877500 -3.35641500 -1.09887700  
H -1.55261700 -2.62901600 -1.04866000  
C -5.21117000 -1.98119000 -0.00240300  
H -4.49670900 -0.17819900 0.88282300  
C -4.85332700 -3.11082700 -0.71093600  
H -3.30306200 -4.25378000 -1.64860700  
H -6.24034700 -1.82416800 0.28791000  
C -0.58384300 -0.77047500 0.97918100  
C -0.57363800 -2.00985800 1.61291600  
C 0.51629800 0.07639800 1.12397100  
C 0.52685100 -2.41496300 2.35736700  
H -1.42537000 -2.66853500 1.54161400  
C 1.61785700 -0.30758100 1.87017700  
H 0.52096100 1.05277500 0.66187000  
C 1.60212600 -1.55534800 2.46495000  
H 0.54882200 -3.37785400 2.84761300  
H 2.47946400 0.33498300 1.97441400  
F -5.80906000 -4.01041400 -1.03448900  
F 2.68132500 -1.94711500 3.17890700  
H 2.94789700 3.10765200 -2.57092700
